# Supplementary material for: Transcriptomic and microRNAomic profiling reveals molecular mechanisms to cope with silver nanoparticle exposure in the ciliate Euplotes vannus
Source: Royal Society of Chemistry journal article supplement (doi:10.1039/c8en00924d), 2018-01-01
Supplement: c8en00924d2.xlsx [file c8en00924d2.xlsx]

## Sheet: Sheet1
microRNA ID	microRNA name	Pre_sequence	Mature_sequence	Length
c20367.graph_c0_57139	eva-miR-N1	auuaaaaggugaagacacuccuugagagggagagaugcucuaagaauauauccagcuauagucuucaaaggcagacuauugcuuugaucaauaauuuuucgaguauuaacuu	gcagacuauugcuuugaucaau	22
c47163.graph_c0_505280	eva-miR-N2	aguucuuuugugaaucagaaaaggaguaugaaaaucuuggcaauaacacaaagccguguuugacgaauaaagauuuucagaguauuccagaucuucagcagguuauagagcc	aaggaguaugaaaaucuuggcaaua	25
c48045.graph_c0_535709	eva-miR-N3	aggcuaauucugaaaagaaaaucauucaggaaguauagauuugcaauuauuucuaaacauuauccugagaaaauaaauuuugcugcaauauaacugcaccgcauuaauccaucuu	aucauucaggaaguauagauuugca	25
c21755.graph_c0_79525	eva-miR-N4	gaagacuccucaagaccuugaaacuugacgaucucuauaaaggcguggaagaaguugacgguaacguaugggaugucuaugaacaagacaagguugaugagaagagaa	gaaacuugacgaucucuau	19
c43072.graph_c0_388197	eva-miR-N5	uuuuucuucaggaaugaguaaaaacuaggccuuuggcgaccauagauauuuucuguuauccuaccccucuggggucuaguaucagaaaucuucauaaauuuuaguuagaaa	ggggucuaguaucagaaaucu	21
c32909.graph_c0_192175	eva-miR-N6	ccugcaggcgucagggcacguggagaaguucucugaccugauggugaaggacaccaagacaggcgagugcuuccgcgccgacaagcuccuggaagacaccauugacaacc	uggagaaguucucugaccug	20
c55731.graph_c0_831650	eva-miR-N7	cggcgagucugcaggcauggugaaggugcucacugacaaggccaccgaccgcauccugggcgugcacaucaugggccccaacgccggcgagcucauugccgaggcugu	ugaaggugcucacugaca	18
c71490.graph_c0_854897	eva-miR-N8	gcggguaaagcccggggaaaagauuccuguggauggugugguuauggaaggucagaccgccauagacgaguccaugaucacgggcgaacccauuccugugaacaaggaa	uccaugaucacgggcgaacc	20
c36281.graph_c0_248209	eva-miR-N9	aucacacucgcuuuggcuccuauccgucucugacuuuagugagacaucuucacuguuaucagaguuagagucuagguccucuucgggaacgaagucgucgucaucuucuucau	uauccgucucugacuuuagugag	23
c18677.graph_c0_9490	eva-miR-N10	caaugccugauuccccuuccagcauugcuguccaugauguugagagaucagggccuauaggagacacagcuccuagcccugucacuacaacucuucuuccuuuuugugac	uccuagcccugucacuacaacuc	23
c18974.graph_c0_17327	eva-miR-N11	uccuugcuguacauauaacuuauauggauagcaaggcuacucaauuuuuguaagugaaauuuauguguuauuccuugauuauuugaguuuuauuucauauuaauuucu	uauauggauagcaaggcu	18
c50193.graph_c1_622246	eva-miR-N12	ucaggagaauucuguacgccaugaucauuguguucuugaaggacuuccccacaaugcaaguguucagcuuuguaaugaucuguauuccuaucuucucucuccauguugugau	uuguaaugaucuguauuccuauc	23
c33354.graph_c0_198513	eva-miR-N13	gaucaugaucaaacuuggugucuauacuggcccuaggauuaaucggcuccucgcugaaacucuucgucaguuguauauuaaacuugaugaucauuacaagaaagauugaauu	uuguauauuaaacuugaugauc	22
c48207.graph_c0_540855	eva-miR-N14	cugaagucagagcuuacagaacauaaggaaucaauugagaagacuaagaaaguccucacacuuggaaagaaauauguagacucgugaguaagacaguucagaagagacaaaaag	aauauguagacucgugaguaagac	24
c35019.graph_c1_222576	eva-miR-N15	uaaaugagucgagccuucauuccaacagcgcguuuugcaugggugaccgcuuguguguguguguguugccuuuggcgugauuuuggcucggcuguuuuuuu	uuuggcgugauuuuggcucggcugu	25
c51799.graph_c2_712076	eva-miR-N16	acacauuuuaugacaugcugggccagaucggaggcuuucuuggaauuuugcuaucagcuggaaaucuucuuuccggacuaguaucaaaaaauauuuuuaugaugacccuucu	uuccggacuaguaucaaaaaau	22
c18073.graph_c0_3692	eva-miR-N17	gcccagagggcucaucccuauuacuucaauaauugugcucucucaauucugcucuuccugccaguaagcagggaagaaguauugagacucacagagaaguggagaagggga	uuacuucaauaauugugcucu	21
c18104.graph_c0_3826	eva-miR-N18	guuaagagugccuuccgaagguaggacgcauucuucccaagcccaggaauaaugcagaucuucgucaaggcacuuucgggcaagacccu	augcagaucuucgucaag	18
c18245.graph_c0_4358	eva-miR-N19	gcuccuaaauuuguacugccucagaucguuggaaaucuccugggcaucuuggugccuccuuggcauuauuuuuguucuguuuugcuuguaucugauaaauucaggagaagga	uuuuguucuguuuugcuuguauc	23
c18486.graph_c0_5802	eva-miR-N20	ucguuaacgauuguuuacguguaaauauagagacaaaagaaggcaaaucaagauauguagagccggaacuuaguauaaguagacgugaguaaaggcgacgccguaccauua	uaguauaaguagacgugagua	21
c18748.graph_c0_11502	eva-miR-N21	cucugugaaguaaaauucucuuuguucaccaagaaaaagagacacuguaaaagaugcagucggugcaucugcaacgacugcgguaguaacagaagaauccucuccagaauagaca	gcaacgacugcgguaguaacagaag	25
c18801.graph_c0_12770	eva-miR-N22	cuccucauucgugaaggguuugcacccaaguacaaacucgccuuugauucagcagaagagggagaagcauaaggagcugaaugaaagaguuaaaagaauuagagagaaaga	aaggagcugaaugaaagaguu	21
c19130.graph_c0_21535	eva-miR-N23	aauugagucuuucuguugauagcuucaaggcugccuuaaucgaugauacaggacucuaucaucagcuucuaauaggcuuugacguugaaaauaucaaggcuaaaauuua	auugagucuuucuguugaua	20
c19335.graph_c0_25319	eva-miR-N24	uccuuuguggagcauuucuaaugucuuagagucaaucacaagaauuagcacaaaagugcuagauaggauguggaucuuuaacuuuagaauugaugcuaagcaguuuaaga	auguggaucuuuaacuuuaga	21
c19354.graph_c0_25653	eva-miR-N25	caacuauugacucuccaucaguggagguuucccacugacuucacugggcuugaugacuagcagccucuucuagcucugcuggucucauaauuuucaaaucacccgucauau	uagcucugcuggucucauaau	21
c19394.graph_c0_26467	eva-miR-N26	gaguaaauuugaugagcaaaaucuuaaggauucuggagacacgaaucuccagaguucuacaagucaaaaucugcauaaaaauggcgguaauuucgcccauccaugcgauccca	ucuuaaggauucuggagacac	21
c19656.graph_c0_33509	eva-miR-N27	caucaauaaggguuugaucuuagaacucaagcagagccuguaucacaugcuuauucugaagaacaagaaaaggaaaaguuuaaagggcuugagugccucuaggagaaaacca	uuagaacucaagcagagcc	19
c19886.graph_c0_41162	eva-miR-N28	auagaagguaauggcuccucuacucagucguguuuguagcuuuugcuccaagcacagcucuguguagagguguuauuagucacuaaaguuccaaacuuuugugaccuag	ucuacucagucguguuuguag	21
c19904.graph_c0_41820	eva-miR-N29	aauacccauaaggguuaacucucacauuauggacagucuuguggcaauuacagguuggauaguauugccuuggcuguucauaaucuuugucuucuucauaauguucauuau	uuggcuguucauaaucuuugu	21
c20053.graph_c0_47190	eva-miR-N30	uuccuaaugauuucaucuuucugcgccagaguggccccauugagcuggucauaguugccauugggcuccuugacuggcucuuuauguaaggauuccuccucuucuucagau	ugacuggcucuuuauguaagg	21
c20174.graph_c0_51077	eva-miR-N31	uaacagucauucuauguauaaauauaauauaaaauccucuaauuaugaaguuuguagaauuccaguuaaaauaccugcaaauuucaugagcauugagacugaugauggcag	auaccugcaaauuucaugagc	21
c20294.graph_c0_54886	eva-miR-N32	augauugguucaugaccuggucauugucuggcuauaacuuaguugguuacuguuguggccuaacuucauugaguuaugaacaucuccgaggucguccaccagaugaagaccuu	ucauugucuggcuauaacuuagu	23
c20447.graph_c0_59899	eva-miR-N33	cugaaagccaaccagaaauaaauaucacaaaguccacugagauauugaguuagaggauuuugugauuaaauaaaauuucucuuuuuacagucaacggagauaaaaucaaau	aauaucacaaaguccacugag	21
c20450.graph_c0_60002	eva-miR-N34	uccaaucaaaggcuuugucuucugcuguuucuguacaacaaugguuucaugucucuuuucuucacgaggcuucaugaugcucggagacugcuucugagaacccagguccauga	ucugcuguuucuguacaacaaug	23
c20467.graph_c0_60569	eva-miR-N35	cuuugcuccagucuaacuagugcaaauuaugguaccuuauaaugaauuaguuagacuggagcaaagcggaaagucuuu	uuauaaugaauuaguuagacug	20
c20467.graph_c0_60574	eva-miR-N36	ugaucaauguuccgucuuuuuggaacauuacaauuuugagaagagagcuuagagcguucucaguagcaaaauuguuuucuucagacauuggaucugggacacugauaacu	uggaacauuacaauuuugag	22
c20635.graph_c0_66628	eva-miR-N37	agaucuuuggaagagucgaacuugaggaguaccagaaaaaggcggaaaaagagcgccuaauucugcuuaaaaagcaaguucgggcacaagagaaucauauugcucgcaaggguaa	aaagcaaguucgggcacaagagaau	25
c20637.graph_c0_66679	eva-miR-N38	cgcauugauacuauccugcuuggacgaagacuuuauuugaauuuuguuaagaauguaggaaacuacuuggucacugaauucuuggaagucuuuuggguccaugaaguuuagg	uggacgaagacuuuauuugaau	22
c21029.graph_c0_73670	eva-miR-N39	uggagguagucauuauggucgaucauguucucacagaauugacauaguuuaggcuucuugucgcaauucucuucgugaucaccaaacucgugcuucauugcuuugaaugagc	ucuucgugaucaccaaacucgug	23
c21335.graph_c0_77179	eva-miR-N40	cgaugcacuccaguauccugccuauugugaggaaaucaagccugaagguuucuucccgugguggauaaucuuuggaaaaggaggaaauggaguagauggugauuacug	uuuggaaaaggaggaaau	18
c23356.graph_c0_85436	eva-miR-N41	gagagagacuagaaagccaaacugcuuauagaaauguucugaaccaucaacagagauuuaagaaugagcacccugagucuucucuuaagguuaaugaaccaaugcagaagccaau	acugcuuauagaaauguucugaacc	25
c25494.graph_c0_106992	eva-miR-N42	uaucaucagagguuuucuaaugacucugaguaucauaauucuucuaauugguuggcuggucauccugauuggaaguauuuaugaaucagagaucaaugaugcugcuaaaga	ugacucugaguaucauaauuc	21
c25587.graph_c0_108318	eva-miR-N43	uuccuacuccucaaaggauuaugaauauaacaacagggaguugucuaggucgcaccucagcaagcugaggugcuccgaucgugacaaaucuugagauaaauccggaaaccgag	ugcuccgaucgugacaaaucuug	23
c25934.graph_c0_113586	eva-miR-N44	gaggaucuuuguagacuccuuuuccguuuuucauguucuguuuccacucuccuguguauacagagccgucugagccguagaaggugccuauuccauccauuuugccuugcuuc	uuuccguuuuucauguucuguuu	23
c26061.graph_c1_115407	eva-miR-N45	ugagaagaagguauacauacacauuucugacuucuuacaugaaauugauaacccagaucuuauuggaggagacuccaaucucuguguugagaagagggaugacaaugaccuca	uacacauuucugacuucuuacaug	24
c26446.graph_c0_121832	eva-miR-N46	ccaucuugguucccucucuuugcuggagauuaugacgacuuuucaagugauugguacaacgaaguugguacagcaauuaucuugacaauguucuuguccaucuuugguccacau	ugcuggagauuaugacgacuuuuc	24
c26577.graph_c0_123625	eva-miR-N47	gaaauuuugucuggaaaauuaagauucugggaaauucugaaauuuuuauauugaaauuuuacggguuuuuggaauuuuuaagugggaauagguugauuaaaaaaccaaagcga	aagauucugggaaauucugaaau	23
c26742.graph_c0_125824	eva-miR-N48	agcuauuccuaagauaucccuauaauuuggggcggaggcaugcucaaguguccuuauccgaagaggaaaagagauagucucugcaacaaauuccugaaauuuuggccuguuugu	gagauagucucugcaacaaauucc	24
c26840.graph_c0_127607	eva-miR-N49	uggcuucaugggguuaaaugagaccucucaaguccuuuuggcuucaaugaaaaugaagcacuucgagaccuagacggucuuaaagauaacuucaugguccaagcaaggagag	uagacggucuuaaagauaacuu	22
c27970.graph_c0_146653	eva-miR-N50	ucacagccucaaaauggaaaaacucuacgaucucaccuucaaacaacucuucagggguauucucaagaacgucagggucuauccuuccacuaacagggaacuuuu	auggaaaaacucuacgaucuca	22
c28137.graph_c0_149623	eva-miR-N51	cuccaauuucguuugagcuuucucucugaacucuguuuucaagugauaaaguaggauuaacuccuuuguuuaagucgaaccugaaaauucuaguuaagagagcagcuccaauu	ucucucugaacucuguuuucaag	23
c29527.graph_c0_157588	eva-miR-N52	cgugagccggacgaucgcugcuguggagaucuccgugauugaagcaggggaggaaaguccgggcuucauagggcaaggugccag	ggggaggaaaguccgggc	18
c30857.graph_c0_162895	eva-miR-N53	uaauguuguaaaaauuugggauacuaacaguacaucagacccuuuaacuaaaauuaucgaggaggguaauaccggaguauacucaguagacuacaaucuuuccggaggaguc	accggaguauacucaguagacuac	24
c31447.graph_c0_168217	eva-miR-N54	gaggaggaauuuggaguuuuggggguuugggguuuuggaaaugaguuacuaaucucccauaggccaucaagauacgaauccucaccaccuuaauucucuucguccuca	uuuggggguuugggguuuugg	21
c31881.graph_c0_175545	eva-miR-N55	gauuuaugcacaguuggaaaacuccaagcauugccugaaguuaacuuagagaaagcuuugguucaaccaagaacuaauauuucucugagauuccauaauuucugggaggcua	gaacuaauauuucucugagauu	22
c32076.graph_c1_178465	eva-miR-N56	gaaggcaucacaauguuacauaacuugguuggaaaugaacacagagagcaggaaacccagagcaauauugcuagcuucgggcucaaccaggaccaccgucuucgcaaauaugcu	cuagcuucgggcucaaccaggacc	24
c32460.graph_c0_184229	eva-miR-N57	aaggagggagugggcguggacaugccgugguguagcuggacugcugucgguggucaaugcauucgggaugugccgggcacaauccacagccuccgac	caugccgugguguagcuggacugc	24
c32861.graph_c0_191294	eva-miR-N58	ucuugccuugaguucaacuguugugcucugaaaaucacugucuuuccugaucuucuggauuuuaauccauuuuucauagagugcaauaccgagguucuugacuuucuuuuuc	uugugcucugaaaaucacugucu	23
c33151.graph_c0_195476	eva-miR-N59	agcauccugagaaaauaaguaacgaagaggcucugaucaggcuaaauuuaauccaugaaaacacaucuauguucccugaguuugaaaaagacaguuuuagguacuuuuucccc	aacgaagaggcucugaucaggcu	23
c33417.graph_c1_199873	eva-miR-N60	aaugcucuuuccuccauuaacgauaguuccuuugaugauucuaauagucaauaugacagcaauguuguaaagacaccucaaaaugucagaagagcuauuaaagagaacaa	uaacgauaguuccuuugaugauu	23
c33727.graph_c0_203526	eva-miR-N61	uauauucgauggagguuuaaauauuggaaaguucaugcugagucuuauuagcauaauuuuuaacuugauauuuauguuccagcauuacugccuuuacaggaauaaugcuccccc	auuggaaaguucaugcugagu	21
c33946.graph_c0_206481	eva-miR-N62	accaacuccuugccaaagagagcaagaugggucauuucuacgcaaauaggagaaaauccaacccugugaaugauucauacaacuuuggcaagaguuucaagaagaauacc	ugauucauacaacuuuggca	20
c34026.graph_c0_207403	eva-miR-N63	aaauaaaaagacuccuagguuggauuuuaacucuuugaguacucaaaguaguaaucagagguuuccaaagaggguuaucaggaagagcuugagacccuaauaccgauuuug	uuggauuuuaacucuuugagua	22
c34316.graph_c1_211163	eva-miR-N64	agcaauacccauuguaagaaaggaaauugugucuugagagugguucagauauuucauaagagguuuuaccucuucugauucuuugaauucuucacuuucacucaagaauu	ucuucugauucuuugaauucuuc	23
c34471.graph_c1_213762	eva-miR-N65	caucauucucuucauauugcccauugacgaucuccugaauugggucuagcuugcacauagcuauauuucaggagugucgucuguaguaauaacuguugauggcauuuuguuu	ccauugacgaucuccugaauug	22
c34669.graph_c0_216644	eva-miR-N66	aagacugaucaacuuccuuacugacugcugcaacuuugagaaaucaaauaugaucaucguuagucgcaagcagggcgcugagguagccauccagauggcugcagagcacaacugugc	gacugcugcaacuuugagaaaucaa	25
c35651.graph_c0_234733	eva-miR-N67	uaacauuaagcaagaaaauggagauauugaugaagaaaaggauaaagaguuugaaaaaguucuuaacaugcauuuugagacugaaaaccuucuucauugauuuucaagauac	cauuuugagacugaaaaccuuc	22
c35667.graph_c0_235079	eva-miR-N68	acuuguaucugcaggagauagaggcuuagaauagggagauuccagaggauaucuaugagccaccggcucauagaacugcuuaggaucuccuauguucucacaagacucucc	uagaacugcuuaggaucuccua	22
c35778.graph_c0_237635	eva-miR-N69	cgagagcuugaucucucgaaaaaaugaaaauaaaguugugaaaucuaaggucagaaucucaagggauauuaccagugggacuccagacuuuaauaagacagaguuggacaagau	accagugggacuccagacuuuaau	24
c35872.graph_c0_240159	eva-miR-N70	augaagucaggaagagauucaagauuagugagcuugaagaacagucuauugaucauaucaauucaaguacuaauaacccucauaacucuucacaugauauuucaggcuccuuc	aagauuagugagcuugaagaaca	23
c36181.graph_c0_246109	eva-miR-N71	guucguggugucgaguagccaauacugagacuauacuagcucuccauaugaggaguaugggguaucauguaugucccaugacucugaaugugauacugaagaaggcuacaua	augucccaugacucugaaugugau	24
c36585.graph_c0_255739	eva-miR-N72	ggguggguguugcaguguguguuuggcauggugcuggagggucacgcgcagcagggucugacagugcccauguucuucaaaugcacucugugaacgcuuaaaaaaaaaaaaa	uguucuucaaaugcacucugugaac	25
c37702.graph_c0_272112	eva-miR-N73	acagcuauauuugauuauagucuugauaugggggaaugcaucuuagaaguaucaaaggcuguaggaaagcuuccugacaaaauagacuauaaauucuuugaguccuuauc	uuccugacaaaauagacuau	20
c37869.graph_c1_274562	eva-miR-N74	agcucagccaccuccugagccuacuaagaagccaaguaagccugaaguuccugagucuaaaccuucuucagaagguuuagacucugagcccaguaaaguaguuucaucuggaacu	gaagguuuagacucugagcccagua	25
c38045.graph_c1_277177	eva-miR-N75	cucaugguaaaaaugcuuaucacucauggucuuaaugauaguguagcagauacuugcauaaagagacacaucagugauuagagcaaagauuuuaccugauuuuguagacuc	ucagugauuagagcaaagauuu	22
c38506.graph_c0_286647	eva-miR-N76	uguuuagaguuuuagaaaguuuccagaaacccaaauccacaaccaguucaaaucuagacgauucucaauuagagaauucugauuuaaacacaauugaugcacuuaaaaauu	agagaauucugauuuaaacacaauu	25
c38543.graph_c0_287283	eva-miR-N77	cacuuuagguaguguaaagacagcuaauagcucccaugcuccuaauucucaguguagaaaccucagcgggaugagaucuaucacugcgaaugucucuaauaggagccagaa	augagaucuaucacugcgaaugu	23
c38640.graph_c1_289261	eva-miR-N78	gagccaaacagugaaguguucagacguggagcugcagucauuaaggaccacgaagaagccaaggccagacaacuuggucaugaagacgaaaagcagcaccaagaugagca	cagacguggagcugcaguca	20
c38858.graph_c1_292794	eva-miR-N79	cagugaaaggauucaguaacuucucaugaucaaaguugaacuuuccagugucaacaucuugagugagaaguuuaccaguuccauguccaagaagcucaugaagagcaaccauu	uucucaugaucaaaguugaacuu	23
c39730.graph_c0_310127	eva-miR-N80	auaaggaucccuccaagucacagaaggacauauuuagacaauagagguuugcucugauccuuagugacugcuucauuggcuuuuggaugguuuccauuaacuugauuacuau	cagaaggacauauuuagacaau	22
c39761.graph_c0_310813	eva-miR-N81	ugucuuuagaugacuuugagaaccugucucuucuaggggauggggcuuauucaacuguguauaaagucaggaggauuucugacggucagauuuaugcccuca	gaugacuuugagaaccugucucuuc	25
c39825.graph_c1_312009	eva-miR-N82	gaggcucauaaaauguuugccaaaaucagagacauuaaaaucauucagaaacucauuugucuugccaaaauauuugaucucgaugauauuggagagauuuuaguaagccaa	uauuugaucucgaugauauug	21
c39993.graph_c0_315742	eva-miR-N83	ucauuaauauugagucaaacuaugaugaaguagcucaagaucuaggagcuaagguagaucaugauacuacuaagggaauuccagagucugagguuacuccauucaguuugug	uaugaugaaguagcucaagauc	22
c40147.graph_c0_318792	eva-miR-N84	ccagcuaauuucggauuuuaacccuggguacuggucgaaugaucugugcuaauucgaccaguaccaggugguuccccugguagguauauaagccgguua	acccuggguacuggucgaaugauc	24
c40362.graph_c0_323516	eva-miR-N85	cgauuucaacaaggaaaaccuugaacuguggggaaagauguucuuaaggaucaaacccauuaggaaaauugagaaagaacugacagauaagguucaaaugguccucaugaaag	uugaacuguggggaaagauguuc	23
c40556.graph_c0_328051	eva-miR-N86	uggagaguggauuuaggaucuuugggguuuugggguuuuuggaauuugaaauuuacgaguuuuagaggggauuuuagaggguuuagauuguuuuuaucggcuuuuguga	uugggguuuugggguuuu	18
c40787.graph_c0_333134	eva-miR-N87	agucuugucaaaggaguaauuguauaucauacugaacauggggaagaaccugaucuuccucucuaugaauuggucuaguaugaagguauacucuugcucgaacaauacauggcc	uggucuaguaugaagguauacucu	24
c40976.graph_c0_337399	eva-miR-N88	cuggguuuuggugauccguaaggaccuugugcucuuguugauguagucauugaagauggaugaauccaucuccaucuucuuaaugaacucuucagcacccaucgauucuga	uccaucuucuuaaugaacucu	21
c41003.graph_c0_338090	eva-miR-N89	gguuauacaauaacauuaguucuucuuugaggaauucucaguuguuccuuggcacagccagauggggcuuugacuguugcucaaagaugcgagagauauggauuuggauau	ugacuguugcucaaagaugcg	21
c41466.graph_c0_348986	eva-miR-N90	ccugccugaggguuugaaauauuagaccccuaagccaggaacucgagagccagccucugcuaaggaaauuucuuaguagaaccagguucaucgaggucuggaagggcaggauc	uucuuaguagaaccagguucaucg	24
c42127.graph_c0_366960	eva-miR-N91	uugaggugauaauuuagaaauagauuucuuacuaaaacuugagcuagcagucaucaugagcuuucucugcucacugugugcaugcucaacgcuagaagaucucuggguuguc	cugcucacugugugcaugcuc	21
c42138.graph_c0_367247	eva-miR-N92	ucccagaagccagacuuguucuaacuauuuguaguaauaaauuagcaaauauugcugagaaggagccccuucucagaauuaguggaaauuuguucuaaaauucuggugcuga	ucucagaauuaguggaaauuug	22
c42159.graph_c0_367724	eva-miR-N93	ccccagauucucuuucauuggguagcuuuuugucagaaagagaggcaguagcugcccugagugguaaaauuuacgaggcugguagauuugccucuuuuccuucaauaaagaa	gaggcaguagcugcccugaguggua	25
c42327.graph_c0_371935	eva-miR-N94	caucauucuugggaagaucuugcugggaagaauucaaguguugaggaaggugagcauuccugcucaagcugcucauauucgaacgauuccaagcaggaucuugagcauuuug	ugcugggaagaauucaaguguu	22
c42814.graph_c0_383048	eva-miR-N95	caaagaaucaucggcugugaggucgauuguaguggguucaaaguuuacacaccuaaaggaaaacuugaaaaaucuguagaucuugagcaagcuaaucauuugaaguacaccaaa	aaucuguagaucuugagcaagcua	24
c43307.graph_c0_394598	eva-miR-N96	auugucuuuguacuagggaugaaauuuuagggcucuucuuuaguuauuuagagagauggccagaggugacuucucugguagaucgacuuugaaggauuuaacuaagcuugg	uucucugguagaucgacuuug	21
c43835.graph_c0_408432	eva-miR-N97	ugcuucuagggaaacacaacuucuuacugagagcgauguaucuccaguuuccaagaaugaccuuggagaugaugcuagcagugaagaugauauugaagaaacucaagauuugu	uucuuacugagagcgauguaucu	23
c44679.graph_c0_430772	eva-miR-N98	gcuucugccuugguggaaagagcacuaaucuuucaauuugcaauacuggugacucgaugaucagagcaauugggauuccgacuauuaaacaaaucaggaaaguagguagugcgu	ugggauuccgacuauuaaacaaau	24
c45109.graph_c0_443002	eva-miR-N99	uuaccaugagauauucaagcagagaauugaugauagaugaagggacugcguauaacaaaauagugaauagucccuguacgaauuuaucuuuguuucuuuggaugaucccgugca	ucccuguacgaauuuaucuuuguu	24
c45339.graph_c0_449649	eva-miR-N100	uaucucaaucaagcagucguauuccccuggggaugguuuugcugacaaagcccagaaguuacucuuaaaagaggagaacucuagcuuuccagcuccauccucgccuacaagcc	gaggagaacucuagcuuuccagc	23
c45379.graph_c0_450773	eva-miR-N101	acagaucugagaaguugccuaccuaucucagcugcauugaauuccuccaaagcaaaggcgaaaauguaaccaaaaugagagaggaagcaucccuugcagaaaugacuuauga	cagaucugagaaguugccua	20
c45932.graph_c0_466218	eva-miR-N102	cccaaucucauuguucacagccauugcugugaccaacaaagucuugucacugauggccuccuugagaaggucaagauuuauaagaccuguugguucaacagggagaauuuu	ucaagauuuauaagaccuguu	21
c45953.graph_c0_466970	eva-miR-N103	aucuuauccauuaauucacgagugauuggagaauagagagcuguuccagaguaaucaugagguguaagcaucaaaguuuuccaauauuccugaaugucuguugaaggaucaaga	agugauuggagaauagagagcugu	24
c46035.graph_c0_469218	eva-miR-N104	aucacauauuuuccauaagucaaauauuucuuaaguccugaugcugcaagauagcucaauaaugagcacauagggacaagaaaucugacuucuuuaugagagaucaaacuca	uagggacaagaaaucugacuucu	23
c46309.graph_c0_478203	eva-miR-N105	cauuacguucuggagaguuggucugugaagaggagcucaguauugaugaagguaauagccauaaucaucauggaaaagaugcuuaugucacagaauccgugagaggugagc	gucugugaagaggagcucagu	21
c46311.graph_c0_478229	eva-miR-N106	caacaucauccccaacguccacuugcacaaggacuggaagaaccgaguuaagacuugguucaaccaaccuggucgcaagcagacccgccgacgaaugagaaacgagaaggccgc	acuugcacaaggacuggaagaacc	24
c46783.graph_c0_493025	eva-miR-N107	guccuaucaaguaguaauacgaagaagcuaauaaacucagaugauuauguagaucuuauagagaaaaguucuaucuauaaggcuaugaauauaauugauuccugcaaucu	cuaucuauaaggcuaugaauau	22
c46804.graph_c0_493665	eva-miR-N108	gcuugagagagagccaaggagugaaacaacuuauggucauucagaaauggaagcugcaagaaagcaaaaauguaaaucuguagaucuauuacucucuugguguucuagcagu	uguaaaucuguagaucuauuac	22
c46890.graph_c0_496337	eva-miR-N109	ccuccugguccuugagaaggguugucagaucgucaaggaugugguuugaagcgauuuucuuaccaaauccuuugaugaucugguuaaucugcuuagcaauacagugucugau	uugaugaucugguuaaucugc	21
c46988.graph_c0_500111	eva-miR-N110	auaucgugaugugggagaguuuggugucuugauugugcucuggagcauaugaagauggacaauaagugcucucauugaagagcugauauuaauacugggcuuuucagcgac	uuggugucuugauugugcucu	21
c47064.graph_c0_502416	eva-miR-N111	accaacuguuguauacaucauaauauucaucaugggagauuauacuguaaacgaaugcuucucucuugaauggguaaucgauguagacagcuucucucuuucuugacacaaa	uggguaaucgauguagacagcu	22
c47119.graph_c0_503941	eva-miR-N112	aaacaaugaacucuccuauuaauccuuuagccaagaaaggagcuucagcuucuuucuuggcucccuccuuuaagauuaguaggaagaacauuucugcaguuuccacuccucaaaa	uaagauuaguaggaagaacauuucu	25
c47130.graph_c0_504369	eva-miR-N113	uuuagcacuaaggauucugcuucuguugaucuccaagggauucuggaaauuagauucagaauaaauaugcacacucuuuugcuuugccaggagcaagaguccguuuacccugu	gcuucuguugaucuccaagggau	23
c47173.graph_c0_505636	eva-miR-N114	gcaagaaaucaacuaagauaaagaguagguucuuuguucguaacaagaagaacuccucuaccaagaagcugaugcuuagcaaaauuaacuugauagucccaaaagacaa	aagaguagguucuuuguuc	19
c47243.graph_c0_507582	eva-miR-N115	caaagauuuucuugaaauaacagaagaaaccaaaauggcguauuccaccuuuaucuccauauucuuugaucaaugguauaaaggugggguugguagcuuauuggaugaaaaugau	caaugguauaaaggugggguuggua	25
c47388.graph_c0_512337	eva-miR-N116	cagcugcccacucaguuggaucugugacugagauucucuguuggagagaaucagaagggaagucccucaugauuuuacuagaguaaucuccaagcagaucccagucuuccuca	ucugugacugagauucucuguug	23
c47577.graph_c0_519134	eva-miR-N117	auucucuugauaggcuucuaauauggauaggauuuuggauuugaagcuugaaaauaacguuuucaucacauuuuuaccccaacuccuagacauaagucucaucagagagaac	uuuuuaccccaacuccuagaca	22
c47673.graph_c0_522321	eva-miR-N118	guauauuugugaaaugaauuaaauaauaguaugguguugcuccuuaauuauaggucuuccaggagcaaacuccuugaaagaucuguacauccagcaacucauuggacucau	uccuugaaagaucuguacauc	21
c47678.graph_c0_522523	eva-miR-N119	guacagauccaccuuuccgucaggugacauuuagauucuugauaauggucaguuacuaccugaccuaccauaaggaucucaauaucugauugcacagggaggaauaugagaa	uaaggaucucaauaucugauug	22
c47906.graph_c0_530575	eva-miR-N120	cucuacacgguuguaaaccuucugacuuucaaaaggaauauuuuucucuggaucaaacuuuugacaauauuuagagcugagcauauucuuugaacagucaaccucuuccucu	ucugacuuucaaaaggaauauu	22
c47955.graph_c0_532447	eva-miR-N121	ucaaagguacagccagagaguucauggagaaagaggaucagccuauuccaauaauuaagagacaagggaaccaauaugggaagcucuauuuugauaaauuuaagaugguccaca	augggaagcucuauuuugauaaau	24
c48043.graph_c0_535594	eva-miR-N122	aagcauuguauccugcugucuuuaacaaguagucguauccaaccccaccaauguugggcucggcgacuacuaaguuccagaauccaauguucuuaagccuaguaucaucugca	uuuaacaaguagucguauccaac	23
c48394.graph_c0_548171	eva-miR-N123	gaucucugugagcaauaucuuugcuguguaaguacucaauuccguugaguaugcuugcagcaaagaauuugauaauuuugugguugacuggaugcucucucucaagauagu	uuugcuguguaaguacucaau	21
c48499.graph_c0_552065	eva-miR-N124	uagugaauaccugaagggauugaacaguugcugaaccaaauuccaaaaugaaugcuuuauuuuccaauuggugaucugguucuggcucuuucucuucaacuuugucaccuucc	ugaacaguugcugaaccaaauuc	23
c48550.graph_c0_553871	eva-miR-N125	cgaagauauuucagaagaaucauuagaaguaguauaugauauaaugagacagaucgccauuggcuucaauaagcuaguguucgacgaaucugaagaaucgucuagugaaagu	aagcuaguguucgacgaaucugaag	25
c48558.graph_c0_554121	eva-miR-N126	uucaaucucuguguauccuuucuugauuuuagagcuucucuucuuguugaacucacuaguaaggugagccagaucucugcagagaagcuuuccaauuugaccgucuacucc	uucuugauuuuagagcuucucu	22
c48819.graph_c0_564206	eva-miR-N127	aggugauugaagaugaugagcaagaagaacuugaagagauagaguucgaagauaugcucucugaugucucuuuagaauacccuuccuuaucaucucuaauaagccugauc	gcaagaagaacuugaagagaua	22
c49200.graph_c0_580321	eva-miR-N128	aagaggcgauacaaagcauguggacugaccaaauuuuuggauuuucuaauuucagaaaugcaaaguuuuggggagacauuugugaaggaaggcuuccauucggaagaacau	uggacugaccaaauuuuugga	21
c49358.graph_c0_586428	eva-miR-N129	gacccugaaaucggauuacccggagaugaggguugcaaagcuggaauaguguauguuuuuauuuuagauacaaauagaagcgcucgcgacgguccuugaaaauccgagugagg	acaaauagaagcgcucgcgacggu	24
c49614.graph_c0_597047	eva-miR-N130	uuggaaagacagaugucuaaaccuaucaggcuuggagacuaugacauugccccuaugagacaaaauucugaaagcaguuuaauuuuugaggccaauaaacuuagacuuagugc	accuaucaggcuuggagacuaug	23
c49615.graph_c0_597065	eva-miR-N131	aagaguauggguccagaagacauuugcuuaccauaugagcaucucacgagugaucuuucaucugcuaauauugaucacucugacgauaaacuuccaagagaagacuuaaagc	uaauauugaucacucugacgau	22
c49637.graph_c0_597936	eva-miR-N132	ugaguaccucaagcauaaauacccuuuuggauguagucaaaauuuucgagaagcuccauuuggagauucuauggugacuaauguaccaaaaaccauucuuucuaugcuuga	cccuuuuggauguagucaaaauu	23
c49786.graph_c0_604257	eva-miR-N133	ucuccauguccagagagagcucgaagacgaauggaaggcugcaguuccccaugagccguaaggaagcagcuauccuucuagagaacuaucugugggagaacgagcagcuug	acuaucugugggagaacgagcagcu	25
c50081.graph_c0_616798	eva-miR-N134	guccuuucaggacuagagaaaaaggaacucaacgcaaagcauuaagaauaaaauaccucgacuccagagguaaacgguuuuacaguacugcagacggagaacuccuuuacaaa	aaaggaacucaacgcaaagcauu	23
c50213.graph_c0_623181	eva-miR-N135	cuaaagcuuugucugauaaacuuuucuggcaaacaagaauugauaagaaugaaauaaaguuugaugcuucuagugaucuuuuuaauucuugaucugucauugucaggaauuu	uagugaucuuuuuaauucuugau	23
c50454.graph_c0_634008	eva-miR-N136	uucccacuggucuucgaagauucugagaucuuugauauacacauaaucucuuguuguguaucaacuaucucuguaucaccgguauucuaugagcucaccaucugggucaauaug	uucugagaucuuugauauacacau	24
c50576.graph_c0_639547	eva-miR-N137	aagacuccuuugauuaugaaucugagcugaguauucccauugagaauguugaugggcauuuuuaauaccuaauuccugcuaauauucugauuaccaaaaaaaaaaaaaaa	aauuccugcuaauauucugauu	22
c50598.graph_c0_640697	eva-miR-N138	uauuuuucaacaacuuuuaauuuucguuuucugaucugaauaucuucuuuucgaaucggaacaugaaauuuguaaaauauuuccuugaauuucuuuucaagaguuguguaaa	uuucguuuucugaucugaauauc	23
c50663.graph_c0_643668	eva-miR-N139	ccuaggaagcaugcuuccguucuucacagaacuaauuccuuugagaagaaaaagaaguggccuaaaaccacuacucaggauagaucuaugaagaagacaacuaagcagccaaa	ucuucacagaacuaauuccuuug	23
c50685.graph_c0_644822	eva-miR-N140	ucagcucauaucuuugggaaaauguguacugugagcucugaaaagacaauuuuacagagaacgucacaacucaauuuggaguagucaauauccuaggaauugagacuccaacaag	aauguguacugugagcucugaaaag	25
c50758.graph_c0_648460	eva-miR-N141	augagguucaauuuggagauaaccugaguguagcuagaucuagaagaucugcuuacucgcgagcuggauccagagugacuccgguaaacauuaauguugaaagcguuagucauu	aaccugaguguagcuagaucuag	23
c50796.graph_c0_650817	eva-miR-N142	gauagaugccaugaaguucuacagagcuauguagaugucuauggagauuuccagacaccugcucugauagcuugcuauuacaugaaauaugucagagagaaaaacccaagaguu	acagagcuauguagaugucuaugg	24
c50943.graph_c0_658518	eva-miR-N143	uacuggcuuccgucagcaagaauccaccucuuccucauaguccaaucaaggagaaacagagccucccccuuagagaugaggaagaaggacuuugaaacauggaagaaagcaaac	uagagaugaggaagaaggacuuug	24
c50966.graph_c0_659780	eva-miR-N144	aacuucuuuggcaacaagguguaucaacaauuggucaaggcgaaguccaaggaguccacaguggaguuaauugcugcuaaagacuuuuuugauacacucaaacaagagguuguca	ugcugcuaaagacuuuuuugau	22
c50981.graph_c0_660551	eva-miR-N145	gaagugcauuuccucuucuuuugcaagauuucugaauacagcaccugcuaugaggagggaaagagaaaucauugcacagaggaagaggguaaucuguucccaagacucaca	uugcaagauuucugaauacag	21
c51059.graph_c1_664335	eva-miR-N146	aaguuuuaauaucuuuuucaaggauuugaaaaugaacaggaaacuugucaugauggaucauuuccuguucauuaucagaagacuugcucuuucauuacugcuaaucuuuagaug	uucauuaucagaagacuugcucu	23
c51252.graph_c0_674929	eva-miR-N147	gucgauuccuuugagaauaaagguuuugaucaguuggcaauaagccucgacucuuccgaggaggcucuuguauucaauugaucuuugagcagaucuuucauagcaucuaa	uauucaauugaucuuugagc	20
c51286.graph_c0_677409	eva-miR-N148	cacaucuugaugaugauccaucgaucuguagcuuauugcuugacucaaacagagauacugaucuugauaccaauaagcuuagaucaaaccuuaaaaagcaccuauacgaacg	ucgaucuguagcuuauugcuug	22
c51359.graph_c0_681630	eva-miR-N149	ccucgcaaaagagguccuaaauacuaugaagaaguaaguauggacagggagcuacauuccagauccaagauggauuuuaggaaugaaauaucccaauccccagaggau	uggauuuuaggaaugaaa	18
c51656.graph_c0_700956	eva-miR-N150	caacucacgggagagauauuaagagaugauuugagcuuguuccaaaagggcuauucagauuucaaagagaagguugaugccauugaaauaacaccucucucuacuuaucuaaa	uaagagaugauuugagcuuguucc	24
c51810.graph_c0_713141	eva-miR-N151	cucguuggcaaguccucauuaauguccguggcaagaagaaguacaucggaaccuucggaagcgagaaagaagccgcuauugugcacgacuucuaugccaucggacuuaaugg	aauguccguggcaagaagaagu	22
c51816.graph_c0_713634	eva-miR-N152	cagacugacugucucaauauuuuauucaggauucaaucauuagaagcuaaaguuaguuaucuccuauacaaagauccugaauauaauucaaaauacugguaaguccuuc	acaaagauccugaauauaauuc	22
c52048.graph_c0_733767	eva-miR-N153	uucauucuuguauucuaucuuaauaauguacgugacucuuucaggaacugagagcucagagugcauuacgaaguacugauccuuuugguugcauaggaaugaaaggcaguuu	uaauaauguacgugacucuuuc	22
c52124.graph_c0_740564	eva-miR-N154	ggaauacaaagagaaugccuacaauuugaucgcuaguauuacugauaaugcuagcagucaucaaagcgauacuagcagugaagaaaagcuagcauauggaucaagucacucaa	aauuugaucgcuaguauuacu	21
c52565.graph_c0_758253	eva-miR-N155	gcuugagaucuaaggagcagauauucuaauugauuucuaagaaaguagaaguacucacuuuuaauuuaauauuuaagauccuggauuuacccugaa	cuugagaucuaaggagcagauauuc	25
c52591.graph_c0_758933	eva-miR-N156	aggagguaaauccgcagccaggaaggccaaagauagcccucucaagaaagaagucguugaagaaugcaaagcaugcuucuaugaguucuuugaagaaaugaaaauugaugacgu	gcaugcuucuaugaguucuuugaa	24
c52635.graph_c0_760100	eva-miR-N157	gaacaagaagauaagugcuuuccugaacuuuuugauauauuucuugagaauugggauacuugccauuucaacagaaggcuuuuuauuaucaagaaggucuccaggaagcag	uccugaacuuuuugauauauu	21
c52796.graph_c0_764527	eva-miR-N158	gugccugaaaauaauauuuuugauguugaagucuuugaguuuggaaguuuugucgaucuucuuuggcuguacuuugccaaaguugcugaacccuucaaucuuggaaguaaucu	uuugauguugaagucuuugaguuu	24
c53002.graph_c0_770307	eva-miR-N159	guaacaguugucaauauuguuauggcacuaggauucaguguugaguucuguguccauauugcuauugcauucaacagauuccauggaaccaagcuuucaagagccaaga	auuguuauggcacuaggauucagu	24
c53043.graph_c0_771662	eva-miR-N160	acccagcucugcugcuaaaauccuucugaauucgaacaaguuucugaaaaaauagguacuuucuucuggaaaggaggcucuuauugggauuuggggggguuugaacuggaauu	uccuucugaauucgaacaaguuu	23
c53118.graph_c0_773782	eva-miR-N161	acucuacauuggagguacuuauauagaugaaccauggauauugauccugguaauucauuggauuauaaugguauuaauacccuggauuuuuguggaaguuuuccauuucuac	auacccuggauuuuuguggaaguu	24
c53144.graph_c0_774375	eva-miR-N162	caaccuuguaggagcccagauuugggauacagccggugaagagagauaucagucccucggaguguccuucuaccgaggagcugacugaugaggaaucguauuugauagaaguaa	uaccgaggagcugacugaugagga	24
c53277.graph_c0_777940	eva-miR-N163	guagcuuuuagcuuaguuuuucuggauuuuugcucuauagcacgauauuuccucaaccgcuguaaacucugcugaggguaaaauauugagcugugaauauagcauauagcu	ucuggauuuuugcucuauagc	21
c53393.graph_c0_781209	eva-miR-N164	auucacuaaauacacuuaaugugucuuuccuugugagucuggccuucaaaauauuucuaaucagcuuaagaaguuguuggaaauguuuaauaaauaugaaaauauagcc	aaguuguuggaaauguuuaaua	22
c53447.graph_c0_782728	eva-miR-N165	ugguucuucagcuugagguucaagcucuucaugaggcucuucgucagcucuggcaagaucaacaucuucuugcucuggcucuugauaauucuugacuuugcucuuuucuuc	uucuugcucuggcucuugauaauuc	25
c53530.graph_c0_784983	eva-miR-N166	uccaaugaucuccaaaaaguauuuggggauucaucuguucaacucaugauggucacccucuugauuacuauggcauuugacuuaugcggcaucuuccaaauaguuuuugga	uauuuggggauucaucuguucaacu	25
c53609.graph_c0_786843	eva-miR-N167	uagauuuccucaugagguccugggcaugaggugaagacgacuucggagucaccgaggccuuucaaaaguccuuuaaucaauucugagguguucucagcagugccuacuucagaa	ugggcaugaggugaagacgacuuc	24
c53656.graph_c0_788077	eva-miR-N168	gggaaauaguguuuugguaaauaaauucuaaacagcuauuugaugggcuuagaguguggaauuuggugcucaaagaauaguguuuagauaaucuuuuaggcaau	uggugcucaaagaauaguguuu	22
c53831.graph_c0_792673	eva-miR-N169	uuacuucucucuucacagccugaucugugggaaauagcaugcauucuagaaauagaaaugugagcacucuacaacagaacccguguuauucagauuuccccaaaucaggccu	ccugaucugugggaaauagcaug	23
c54145.graph_c0_800541	eva-miR-N170	agagcaauguuccccaacuacugaugaucccugaaacugacaacaauauuuuuggccuugcuuguaaccccagagauccugacagaacuccugguggcucaaguggagggga	cugaugaucccugaaacugaca	22
c54217.graph_c0_802364	eva-miR-N171	ucucaccauagacacuaaauggagaguuuaaauggauguuguagcauccauuuaugaugaacaugaagcauuccauguagaacauugaugguaagauaccccuuccugaucuu	uuccauguagaacauugauggua	23
c54334.graph_c0_805112	eva-miR-N172	gccacccgacuaaggcugucaagcggauaugcuucuugaaggcgccacagaaccuugucaucaacaucaagagguuuguccacucaucauucaaugucagaaaagacucugcu	acaucaagagguuuguccacucauc	25
c54753.graph_c0_814725	eva-miR-N173	gggcucaggguggucccugaucucugcggccagagccaccgguuggaggagcagugccucauugguguguuugcacucauguccacucuggucucguuagccauaguagauua	uugcacucauguccacucugguc	23
c55508.graph_c0_828741	eva-miR-N174	gaagugauagggaguacacuuuuuguauuauaggaucuggcccagcaggauuuuauacagcaaaaagcuugcucaagucugaaaauggaaguauuaaggucgauauuuugga	uuuuguauuauaggaucuggcc	22
c5554.graph_c0_829182	eva-miR-N175	caaaauuggagccgugguugacgcaggccuuauccccuuccaaaaagccacggaagcaggggucgauuuccucaucguccaccacggccucuucugggguucacaaacucc	uuuccucaucguccaccacggccuc	25
c55899.graph_c0_833070	eva-miR-N176	gacaacuucgaggaccucgugggcagcggcaccccugcgcugguggaguucuacgcgccuugguguggacacugcaaggcccucgagcccgaguacacccgugugggu	ugguguggacacugcaaggcccu	23
c56648.graph_c0_837503	eva-miR-N177	uacggagaguaucuaagggaugacccacaaacccuccacugauuccagcuauaacaccagcaguaaaaucucuggcugguuuugaaaccucaaaucggggagagggagaug	ucuggcugguuuugaaaccuc	21
c56895.graph_c0_838358	eva-miR-N178	acccguggcgcgaguucgacacugugcagaaccugcucgaguacacucagcgggagcuugacgagaaggccgagcucgacggcgaggcuugguucgccaacgguggcg	acugugcagaaccugcuc	18
c57266.graph_c0_839455	eva-miR-N179-1	ggcugcgcugccguggugaucgggcacgugacucugcacccucaggcugggagcaagcagaacacggcguggaacuaugcggaagugcagaaaguucugcacgcucacgcguc	aucgggcacgugacucugcacccuc	25
c57266.graph_c0_839456	eva-miR-N179-2	cugcgcaacuggcguggcugcacgcggagcuggcggcugcagacgccgauggcugcgcugccguggugaucgggcacgugacucugcacccucaggcugggagcaagcagaac	aucgggcacgugacucugcacccuc	25
c59139.graph_c0_843396	eva-miR-N180	uccuugacucuuucagaagguauuugcaaguucuugagacuuucucaaaguucaagacuauugggaugucugaagaucuggcucaaaaauacaugaagauaaaaauagaggc	ugaagaucuggcucaaaaauac	22
c59561.graph_c0_844010	eva-miR-N181	acugcgcacuguagcggagggcguuuucuucgaagcauaaaacuccucuuguugagcuaggaggaguuguucuucuagaucggccuccuccaacccaaaaggaccggg	ucuucuagaucggccucc	18
c60703.graph_c0_845679	eva-miR-N182	agaggagaugaucauuggaaauguggcucugguauugugaaacaguaaacaacacauuuauaacaucaaauagcccccaauuucacuccucaaaccccccucaacaaucaccca	auguggcucugguauugugaaaca	24
c77798.graph_c0_858674	eva-miR-N183	ugcccucacugcgauggcgcuucauggacugggugugccugcuguuucuaggacagggccucagguuggaaucguuacggagggaccucauugcgaugcucgcauugcuuaua	uucauggacugggugugccugcu	23
c79048.graph_c0_859406	eva-miR-N184	agcgccaggccguucugaggaggaggcggcggaggaggagggaaggaggagaacggagucacgacgcccuccggagcucccaucguguccugugaacccuguccggug	aggaggaggcggcggaggagga	22
c81623.graph_c0_860659	eva-miR-N185	gccauagagcgaacggacuggaucuuccaccaacugucgcgugagugggcacacuaaugaggcggguggaggugggucuuuugucaucucguucccacgccgcgugug	gaucuuccaccaacuguc	18
c86597.graph_c0_862716	eva-miR-N186	uuuuagaugcgauaggugacuuuuauguuggggguuauaucuuagggcacuuuaauugcuuuaagucuggccacacccuuaauaauaagcuucuacaugcaaucuucgcagau	uuuuauguuggggguuauaucuu	23
c88989.graph_c0_863736	eva-miR-N187	gugcagguccucgcuuaguguaguccagagugccggcguggccgguaaggagggcucuugggcauggugguuuuuuuauucuccugcagggaguuguauaaucucuccg	uuaguguaguccagagugccggcgu	25
c92663.graph_c0_865117	eva-miR-N188	gcuaagauuuaguauauucuagagaccucugcagaaauugauuuuuguaaaggucucuccugaacccugaa	auucuagagaccucugcagaaauu	24
c92771.graph_c0_865167	eva-miR-N189	ucuuccucuuuugcgaggcaugagccaguuuaccucgagaccucucgagccaagggaucaaaaaaucaucaacaggucucgagguaaacuaguggccuguagacaugcg	aacaggucucgagguaaacu	20
