# Supplementary material for: Transcriptomic and microRNAomic profiling reveals molecular mechanisms to cope with silver nanoparticle exposure in the ciliate Euplotes vannus
Source: Royal Society of Chemistry journal article supplement (doi:10.1039/c8en00924d), 2018-01-01
Supplement: c8en00924d3.xlsx [file c8en00924d3.xlsx]

## Sheet: Sheet1
ID	T1 vs.T0			T12 vs.T0			T12 vs.T1			NR_ID	Nr_annotation	Swissprot_annotation	KOG_class_annotation	GO_annotation	GO_second_level_annotation	KEGG_annotation	KEGG_pathway_annotation
	FDR	log2FC	Regulate	FDR	log2FC	Regulate	FDR	log2FC	Regulate
c33990.graph_c0	1.31898e-06	-1.42421	down	2.88782e-06	-1.25317	down	0.658025	0.177199	normal	gi|428697035|gb|AFZ61876.1|	methionine-R-sulfoxide reductase type B [Euplotes nobilii]	Methionine-R-sulfoxide reductase B1 GN=SelR OS=Drosophila melanogaster (Fruit fly) PE=1 SV=3	Posttranslational modification, protein turnover, chaperones	Molecular Function: zinc ion binding (GO:0008270);; Biological Process: peptidyl-methionine modification (GO:0018206);; Molecular Function: peptide-methionine (R)-S-oxide reductase activity (GO:0033743);;	molecular function: binding (GO:0005488);; biological process: metabolic process (GO:0008152);; biological process: cellular process (GO:0009987);; biological process: single-organism process (GO:0044699);; molecular function: catalytic activity (GO:0003824)	K07305|3.17176e-42|dme:Dmel_CG6584|SelR; Selenoprotein R (EC:1.8.4.- 1.8.4.12); K07305 peptide-methionine (R)-S-oxide reductase [EC:1.8.4.12] (A)	--
c26782.graph_c0	0.129273	1.11999	normal	2.59356e-06	2.11877	up	0.147089	1.00955	normal	gi|281210185|gb|EFA84353.1|	LIM-type zinc finger-containing protein [Polysphondylium pallidum PN500]	LIM domain-containing protein E GN=limE OS=Dictyostelium discoideum (Slime mold) PE=1 SV=1	--	Molecular Function: zinc ion binding (GO:0008270);;	molecular function: binding (GO:0005488)	--	--
c47782.graph_c0	--	--	--	0.00423995	1.39788	up	0.226206	0.809102	normal	gi|470420858|ref|XP_004337340.1|	LIM domain containing protein [Acanthamoeba castellanii str. Neff]	LIM domain-containing protein D GN=limD OS=Dictyostelium discoideum (Slime mold) PE=2 SV=1	--	Molecular Function: zinc ion binding (GO:0008270);;	molecular function: binding (GO:0005488)	--	--
c20993.graph_c0	0.770725	-0.135671	normal	0.001905	0.977898	normal	0.00061212	1.12152	up	gi|678341754|emb|CDW73277.1|	UNKNOWN [Stylonychia lemnae]	Ubiquitin-conjugating enzyme E2-17 kDa GN=eff OS=Drosophila melanogaster (Fruit fly) PE=2 SV=1	Posttranslational modification, protein turnover, chaperones	Molecular Function: ubiquitin-protein transferase activity (GO:0004842);; Biological Process: protein ubiquitination (GO:0016567);;	molecular function: catalytic activity (GO:0003824);; biological process: metabolic process (GO:0008152);; biological process: cellular process (GO:0009987)	K06689|6.96914e-73|lgi:LOTGIDRAFT_205254|hypothetical protein; K06689 ubiquitin-conjugating enzyme E2 D/E [EC:6.3.2.19] (A)	Ubiquitin mediated proteolysis (ko04120);; Protein processing in endoplasmic reticulum (ko04141)
c38187.graph_c0	0.000383373	1.3948	up	3.41195e-10	2.20666	up	0.0630394	0.819592	normal	gi|678341754|emb|CDW73277.1|	UNKNOWN [Stylonychia lemnae]	Ubiquitin-conjugating enzyme E2-17 kDa GN=eff OS=Drosophila melanogaster (Fruit fly) PE=2 SV=1	Posttranslational modification, protein turnover, chaperones	Molecular Function: ubiquitin-protein transferase activity (GO:0004842);; Biological Process: protein ubiquitination (GO:0016567);;	molecular function: catalytic activity (GO:0003824);; biological process: metabolic process (GO:0008152);; biological process: cellular process (GO:0009987)	K06689|3.05644e-60|xma:102234039|ubiquitin-conjugating enzyme E2 D2-like; K06689 ubiquitin-conjugating enzyme E2 D/E [EC:6.3.2.19] (A)	Ubiquitin mediated proteolysis (ko04120);; Protein processing in endoplasmic reticulum (ko04141)
c39130.graph_c0	0.060485	-0.768484	normal	0.000133943	-1.14148	down	0.495958	-0.366942	normal	gi|684410161|ref|XP_009175982.1|	hypothetical protein T265_11140 [Opisthorchis viverrini]	Alpha-tubulin N-acetyltransferase {ECO:0000255|HAMAP-Rule:MF_03130} OS=Leishmania braziliensis PE=3 SV=1	Function unknown	Molecular Function: tubulin N-acetyltransferase activity (GO:0019799);; Biological Process: regulation of microtubule cytoskeleton organization (GO:0070507);;	molecular function: catalytic activity (GO:0003824);; biological process: metabolic process (GO:0008152);; biological process: biological regulation (GO:0065007)	--	--
c52856.graph_c0	0.564539	0.238151	normal	7.87205e-05	1.00331	up	0.010265	0.767939	normal	gi|678314298|emb|CDW87411.1|	alpha-tubulin n-acetyltransferase [Stylonychia lemnae]	Alpha-tubulin N-acetyltransferase {ECO:0000255|HAMAP-Rule:MF_03130} GN=TTHERM_00355780 OS=Tetrahymena thermophila (strain SB210) PE=3 SV=2	Function unknown	Molecular Function: tubulin N-acetyltransferase activity (GO:0019799);; Biological Process: regulation of microtubule cytoskeleton organization (GO:0070507);;	molecular function: catalytic activity (GO:0003824);; biological process: metabolic process (GO:0008152);; biological process: biological regulation (GO:0065007)	--	--
c53246.graph_c0	6.76134e-06	-1.19469	down	6.08767e-13	-1.64702	down	0.183739	-0.448979	normal	gi|678342703|emb|CDW72820.1|	cytoplasmic trna 2-thiolation protein 1-like [Stylonychia lemnae]	Cytoplasmic tRNA 2-thiolation protein 1 {ECO:0000255|HAMAP-Rule:MF_03053} GN=CG8078 OS=Drosophila melanogaster (Fruit fly) PE=1 SV=1	General function prediction only	Molecular Function: tRNA binding (GO:0000049);; Molecular Function: ATP binding (GO:0005524);; Cellular Component: cytoplasm (GO:0005737);; Biological Process: tRNA thio-modification (GO:0034227);;	molecular function: binding (GO:0005488);; cellular component: cell (GO:0005623);; cellular component: cell part (GO:0044464);; biological process: metabolic process (GO:0008152);; biological process: cellular process (GO:0009987)	K14168|1.29913e-162|xtr:548460|ctu1, atpbd3, ncs6; cytosolic thiouridylase subunit 1; K14168 cytoplasmic tRNA 2-thiolation protein 1 [EC:2.7.7.-] (A)	Sulfur relay system (ko04122)
c33534.graph_c0	0.111667	1.07911	normal	5.26875e-07	1.83371	up	0.226503	0.765202	normal	gi|167525373|ref|XP_001747021.1|	hypothetical protein [Monosiga brevicollis MX1]	ADP,ATP carrier protein 1 GN=AGAP006782 OS=Anopheles gambiae (African malaria mosquito) PE=2 SV=2	Energy production and conversion	Molecular Function: transporter activity (GO:0005215);; Cellular Component: mitochondrial inner membrane (GO:0005743);; Cellular Component: integral component of membrane (GO:0016021);; Biological Process: transmembrane transport (GO:0055085);;	molecular function: transporter activity (GO:0005215);; biological process: localization (GO:0051179);; cellular component: cell (GO:0005623);; cellular component: membrane (GO:0016020);; cellular component: organelle (GO:0043226);; cellular component: organelle part (GO:0044422);; cellular component: cell part (GO:0044464);; cellular component: membrane part (GO:0044425);; biological process: ce…	K05863|1.0925e-121|nve:NEMVE_v1g246069|hypothetical protein; K05863 solute carrier family 25 (mitochondrial adenine nucleotide translocator), member 4/5/6/31 (A)	--
c42101.graph_c0	7.87691e-05	-1.0942	down	2.21302e-53	-3.55476	down	3.48012e-23	-2.45641	down	gi|22506699|gb|AAM97613.1|AF480923_1	ADP/ATP carrier [Euplotes sp.]	ADP,ATP carrier protein 1 GN=AGAP006782 OS=Anopheles gambiae (African malaria mosquito) PE=2 SV=2	Energy production and conversion	Molecular Function: transporter activity (GO:0005215);; Cellular Component: mitochondrial inner membrane (GO:0005743);; Cellular Component: integral component of membrane (GO:0016021);; Biological Process: transmembrane transport (GO:0055085);;	molecular function: transporter activity (GO:0005215);; biological process: localization (GO:0051179);; cellular component: cell (GO:0005623);; cellular component: membrane (GO:0016020);; cellular component: organelle (GO:0043226);; cellular component: organelle part (GO:0044422);; cellular component: cell part (GO:0044464);; cellular component: membrane part (GO:0044425);; biological process: ce…	K05863|1.06819e-128|aga:AgaP_AGAP006782|ADT1_ANOGA; AGAP006782-PA; K05863 solute carrier family 25 (mitochondrial adenine nucleotide translocator), member 4/5/6/31 (A)	--
c54734.graph_c0	0.250996	0.831194	normal	3.44107e-06	1.64502	up	0.205783	0.824617	normal	gi|449685376|ref|XP_002165574.2|	PREDICTED: eukaryotic translation initiation factor 5A-like [Hydra vulgaris]	Eukaryotic translation initiation factor 5A GN=eIF-5A OS=Drosophila melanogaster (Fruit fly) PE=2 SV=2	Translation, ribosomal structure and biogenesis	Molecular Function: translation initiation factor activity (GO:0003743);; Molecular Function: translation elongation factor activity (GO:0003746);; Biological Process: translational initiation (GO:0006413);; Biological Process: translational frameshifting (GO:0006452);; Biological Process: peptidyl-lysine modification to peptidyl-hypusine (GO:0008612);; Molecular Function: ribosome binding (GO:00…	molecular function: binding (GO:0005488);; biological process: metabolic process (GO:0008152);; biological process: cellular process (GO:0009987);; biological process: single-organism process (GO:0044699);; biological process: biological regulation (GO:0065007)	K03263|1.02765e-58|hmg:100200771|eukaryotic translation initiation factor 5A-like; K03263 translation initiation factor 5A (A)	--
c48361.graph_c1	0.268065	0.946837	normal	0.006035	1.30092	up	0.64427	0.364131	normal	gi|390352968|ref|XP_787081.3|	PREDICTED: eukaryotic translation initiation factor 2 subunit 3-like [Strongylocentrotus purpuratus]	Eukaryotic translation initiation factor 2 subunit 3 GN=eif2s3 OS=Dictyostelium discoideum (Slime mold) PE=2 SV=1	Translation, ribosomal structure and biogenesis	Molecular Function: translation initiation factor activity (GO:0003743);; Molecular Function: GTPase activity (GO:0003924);; Molecular Function: GTP binding (GO:0005525);; Biological Process: GTP catabolic process (GO:0006184);; Biological Process: translational initiation (GO:0006413);; Molecular Function: histone-lysine N-methyltransferase activity (GO:0018024);; Biological Process: histone lys…	molecular function: binding (GO:0005488);; biological process: metabolic process (GO:0008152);; biological process: cellular process (GO:0009987);; molecular function: catalytic activity (GO:0003824);; biological process: single-organism process (GO:0044699);; biological process: cellular component organization or biogenesis (GO:0071840)	K03242|0|spu:582011|eukaryotic translation initiation factor 2 subunit 3-like; K03242 translation initiation factor 2 subunit 3 (A)	RNA transport (ko03013)
c19365.graph_c0	0.216507	1.00613	normal	2.30377e-06	1.78291	up	0.261933	0.78706	normal	gi|734562006|gb|KHN88002.1|	Eukaryotic initiation factor 4A [Toxocara canis]	Eukaryotic initiation factor 4A-III {ECO:0000303|PubMed:22961380} OS=Drosophila melanogaster (Fruit fly) PE=1 SV=1	Translation, ribosomal structure and biogenesis	Molecular Function: translation initiation factor activity (GO:0003743);; Molecular Function: ATP binding (GO:0005524);; Biological Process: translational initiation (GO:0006413);; Molecular Function: ATP-dependent helicase activity (GO:0008026);;	molecular function: binding (GO:0005488);; biological process: metabolic process (GO:0008152);; biological process: cellular process (GO:0009987);; molecular function: catalytic activity (GO:0003824);; biological process: single-organism process (GO:0044699)	K03257|0|hro:HELRODRAFT_112831|hypothetical protein; K03257 translation initiation factor 4A (A)	RNA transport (ko03013)
c39100.graph_c0	1.26145e-07	-1.61931	down	3.76859e-12	-1.71415	down	0.890356	-0.0892684	normal	gi|403352700|gb|EJY75867.1|	Eukaryotic translation initiation factor, putative [Oxytricha trifallax]	Eukaryotic translation initiation factor 6 {ECO:0000255|HAMAP-Rule:MF_03132} OS=Tetrahymena thermophila (strain SB210) PE=1 SV=1	Translation, ribosomal structure and biogenesis	Molecular Function: translation initiation factor activity (GO:0003743);; Cellular Component: nucleolus (GO:0005730);; Cellular Component: cytoplasm (GO:0005737);; Biological Process: translational initiation (GO:0006413);; Biological Process: mature ribosome assembly (GO:0042256);; Biological Process: ribosomal large subunit biogenesis (GO:0042273);; Molecular Function: ribosome binding (GO:0043…	molecular function: binding (GO:0005488);; biological process: metabolic process (GO:0008152);; biological process: cellular process (GO:0009987);; cellular component: cell (GO:0005623);; cellular component: membrane-enclosed lumen (GO:0031974);; cellular component: organelle (GO:0043226);; cellular component: organelle part (GO:0044422);; cellular component: cell part (GO:0044464);; biological p…	K03264|1.46362e-110|lgi:LOTGIDRAFT_206392|hypothetical protein; K03264 translation initiation factor 6 (A)	Ribosome biogenesis in eukaryotes (ko03008)
c55403.graph_c0	0.0206576	0.755441	normal	0.0312224	-0.682793	normal	3.61998e-06	-1.43394	down	gi|74039744|gb|AAZ94901.1|	elongation factor Tu-like protein [Moneuplotes crassus]	Elongation factor Tu, mitochondrial GN=TUFA OS=Reclinomonas americana PE=3 SV=1	Translation, ribosomal structure and biogenesis	Molecular Function: translation elongation factor activity (GO:0003746);; Molecular Function: GTPase activity (GO:0003924);; Molecular Function: GTP binding (GO:0005525);; Cellular Component: intracellular (GO:0005622);; Biological Process: GTP catabolic process (GO:0006184);; Biological Process: translational elongation (GO:0006414);; Molecular Function: transferase activity (GO:0016740);;	molecular function: binding (GO:0005488);; biological process: metabolic process (GO:0008152);; biological process: cellular process (GO:0009987);; molecular function: catalytic activity (GO:0003824);; biological process: single-organism process (GO:0044699);; cellular component: cell (GO:0005623);; cellular component: cell part (GO:0044464)	--	--
c46923.graph_c0	0.0268403	-0.910148	normal	0.00247347	-1.02304	down	0.852815	-0.113368	normal	gi|403375081|gb|EJY87510.1|	Serine/threonine protein kinase [Oxytricha trifallax]	--	General function prediction only	Molecular Function: transferase activity, transferring phosphorus-containing groups (GO:0016772);; Biological Process: regulation of biological process (GO:0050789);; Biological Process: response to stimulus (GO:0050896);;	molecular function: catalytic activity (GO:0003824);; biological process: metabolic process (GO:0008152);; biological process: biological regulation (GO:0065007);; biological process: response to stimulus (GO:0050896)	K08867|3.44057e-15|mcc:706493|WNK1, HSN2; WNK lysine deficient protein kinase 1; K08867 WNK lysine deficient protein kinase [EC:2.7.11.1] (A)	--
c46008.graph_c0	0.602927	-0.187559	normal	3.03008e-12	-1.48653	down	2.16649e-07	-1.29606	down	gi|678323781|emb|CDW82524.1|	chaperone protein [Stylonychia lemnae]	DnaJ protein homolog 1 GN=DnaJ-1 OS=Drosophila melanogaster (Fruit fly) PE=1 SV=3	Posttranslational modification, protein turnover, chaperones	Molecular Function: transferase activity, transferring phosphorus-containing groups (GO:0016772);; Biological Process: cellular metabolic process (GO:0044237);;	molecular function: catalytic activity (GO:0003824);; biological process: metabolic process (GO:0008152);; biological process: cellular process (GO:0009987)	K09520|2.44686e-12|ggo:101142238|DNAJB14; dnaJ homolog subfamily B member 14 isoform 1; K09520 DnaJ homolog subfamily B member 14 (A)	--
c21193.graph_c0	0.960914	0.0263096	normal	1.56928e-10	1.38142	up	4.08596e-08	1.35945	up	gi|678325567|emb|CDW81614.1|	alpha beta fold family protein [Stylonychia lemnae]	Uncharacterized abhydrolase domain-containing protein DDB_G0269086 GN=DDB_G0269086 OS=Dictyostelium discoideum (Slime mold) PE=1 SV=2	--	Molecular Function: transferase activity, transferring phosphorus-containing groups (GO:0016772);;	molecular function: catalytic activity (GO:0003824);; biological process: metabolic process (GO:0008152)	--	--
c53120.graph_c0	0.960196	-0.0330107	normal	1.57763e-05	-1.15079	down	0.000610396	-1.11553	down	gi|145551765|ref|XP_001461559.1|	hypothetical protein [Paramecium tetraurelia strain d4-2]	Phosphatidate cytidylyltransferase, photoreceptor-specific GN=CdsA OS=Drosophila melanogaster (Fruit fly) PE=1 SV=2	Lipid transport and metabolism	Molecular Function: transferase activity, transferring phosphorus-containing groups (GO:0016772);;	molecular function: catalytic activity (GO:0003824);; biological process: metabolic process (GO:0008152)	K00981|1.83982e-77|nve:NEMVE_v1g235152|hypothetical protein; K00981 phosphatidate cytidylyltransferase [EC:2.7.7.41] (A)	Glycerophospholipid metabolism (ko00564);; Phosphatidylinositol signaling system (ko04070)
c20580.graph_c0	0.996521	0.0294625	normal	7.03281e-06	1.6505	up	0.000164126	1.62107	up	gi|403343169|gb|EJY70909.1|	Bifunctional 3-phosphoadenosine 5-phosphosulfate synthetase 2 [Oxytricha trifallax]	Adenylyl-sulfate kinase OS=Urechis caupo (Innkeeper worm) PE=2 SV=1	Nucleotide transport and metabolism	Molecular Function: transferase activity, transferring phosphorus-containing groups (GO:0016772);;	molecular function: catalytic activity (GO:0003824);; biological process: metabolic process (GO:0008152)	K13811|0|dre:777719|papss2a, zgc:153748; 3'-phosphoadenosine 5'-phosphosulfate synthase 2a; K13811 3'-phosphoadenosine 5'-phosphosulfate synthase [EC:2.7.7.4 2.7.1.25] (A)	Purine metabolism (ko00230);; Selenocompound metabolism (ko00450);; Sulfur metabolism (ko00920)
c46647.graph_c0	2.74707e-07	-1.5484	down	1.55432e-26	-3.33407	down	0.000278399	-1.76977	down	gi|403364806|gb|EJY82178.1|	ABC1 family protein [Oxytricha trifallax]	Probable serine/threonine-protein kinase abkD GN=abkD OS=Dictyostelium discoideum (Slime mold) PE=2 SV=1	General function prediction only	Molecular Function: transferase activity, transferring phosphorus-containing groups (GO:0016772);;	molecular function: catalytic activity (GO:0003824);; biological process: metabolic process (GO:0008152)	K08869|5.88706e-71|myb:102250175|ADCK1; aarF domain containing kinase 1; K08869 aarF domain-containing kinase (A)	--
c34542.graph_c0	0.241602	-0.446614	normal	3.6661e-09	-1.92996	down	4.33967e-05	-1.48595	down	gi|118399712|ref|XP_001032180.1|	Zinc carboxypeptidase family protein [Tetrahymena thermophila]	Cytosolic carboxypeptidase 6 GN=ccpp-6 OS=Caenorhabditis elegans PE=2 SV=2	Amino acid transport and metabolism	Molecular Function: transferase activity, transferring phosphorus-containing groups (GO:0016772);;	molecular function: catalytic activity (GO:0003824);; biological process: metabolic process (GO:0008152)	--	--
c18706.graph_c0	0.143441	0.58372	normal	9.32551e-05	-0.982728	normal	3.25496e-06	-1.56304	down	gi|403340960|gb|EJY69775.1|	Phosphoinositide-dependent protein kinase I [Oxytricha trifallax]	Protein kinase 3 GN=pkgC OS=Dictyostelium discoideum (Slime mold) PE=3 SV=2	Signal transduction mechanisms	Molecular Function: transferase activity, transferring phosphorus-containing groups (GO:0016772);;	molecular function: catalytic activity (GO:0003824);; biological process: metabolic process (GO:0008152)	K06276|1.95179e-53|aqu:100634673|3-phosphoinositide-dependent protein kinase 1-like; K06276 3-phosphoinositide dependent protein kinase-1 [EC:2.7.11.1] (A)	FoxO signaling pathway (ko04068);; mTOR signaling pathway (ko04150)
c19550.graph_c0	0.0488294	-0.753711	normal	0.000368691	-1.00754	down	0.661949	-0.247435	normal	gi|470253012|ref|XP_004359603.1|	p34-cdc2 protein [Dictyostelium fasciculatum]	Cyclin-dependent kinase 7 GN=cdk7 OS=Dictyostelium discoideum (Slime mold) PE=2 SV=2	--	Molecular Function: transferase activity, transferring phosphorus-containing groups (GO:0016772);;	molecular function: catalytic activity (GO:0003824);; biological process: metabolic process (GO:0008152)	K02202|1.04474e-70|aag:AaeL_AAEL001038|cak1; K02202 cyclin-dependent kinase 7 [EC:2.7.11.22 2.7.11.23] (A)	Basal transcription factors (ko03022);; Nucleotide excision repair (ko03420)
c19992.graph_c0	0.483857	-0.303794	normal	6.83965e-10	-1.45436	down	0.000107577	-1.14803	down	gi|678319179|emb|CDW84880.1|	protein kinase domain containing protein [Stylonychia lemnae]	Probable serine/threonine-protein kinase MARK-B GN=mrkB OS=Dictyostelium discoideum (Slime mold) PE=3 SV=1	Signal transduction mechanisms	Molecular Function: transferase activity, transferring phosphorus-containing groups (GO:0016772);;	molecular function: catalytic activity (GO:0003824);; biological process: metabolic process (GO:0008152)	K08796|1.9786e-31|cin:100181650|brsk2; serine/threonine-protein kinase BRSK2; K08796 BR serine/threonine kinase [EC:2.7.11.1] (A)	--
c20225.graph_c0	0.0633511	0.672267	normal	8.69409e-19	2.18451	up	2.4191e-08	1.5149	up	gi|470299603|ref|XP_004346659.1|	calcium/calmodulin-dependent protein kinase I [Capsaspora owczarzaki ATCC 30864]	Probable myosin light chain kinase DDB_G0275057 GN=DDB_G0275057 OS=Dictyostelium discoideum (Slime mold) PE=3 SV=1	Signal transduction mechanisms	Molecular Function: transferase activity, transferring phosphorus-containing groups (GO:0016772);;	molecular function: catalytic activity (GO:0003824);; biological process: metabolic process (GO:0008152)	K08794|1.1212e-54|aqu:100635387|calcium/calmodulin-dependent protein kinase type 1D-like; K08794 calcium/calmodulin-dependent protein kinase I [EC:2.7.11.17] (A)	--
c20678.graph_c0	0.840922	0.095205	normal	1.4572e-08	-1.28826	down	5.89076e-07	-1.37898	down	gi|403358338|gb|EJY78811.1|	Asparagine rich protein, putative [Oxytricha trifallax]	Probable myosin light chain kinase DDB_G0271550 GN=DDB_G0271550 OS=Dictyostelium discoideum (Slime mold) PE=3 SV=1	Signal transduction mechanisms	Molecular Function: transferase activity, transferring phosphorus-containing groups (GO:0016772);;	molecular function: catalytic activity (GO:0003824);; biological process: metabolic process (GO:0008152)	K08794|6.88434e-45|mze:101477929|calcium/calmodulin-dependent protein kinase type 1-like; K08794 calcium/calmodulin-dependent protein kinase I [EC:2.7.11.17] (A)	--
c24729.graph_c0	0.0983392	-0.563014	normal	2.82271e-05	-1.02085	down	0.161469	-0.454714	normal	gi|678319179|emb|CDW84880.1|	protein kinase domain containing protein [Stylonychia lemnae]	Serine/threonine kinase SAD-1 {ECO:0000312|EMBL:AAG50270.1} OS=Caenorhabditis elegans PE=1 SV=2	Signal transduction mechanisms	Molecular Function: transferase activity, transferring phosphorus-containing groups (GO:0016772);;	molecular function: catalytic activity (GO:0003824);; biological process: metabolic process (GO:0008152)	K16311|5.79031e-36|hmg:100213733|serine/threonine-protein kinase SIK2-like; K16311 serine/threonine-protein kinase SIK2 [EC:2.7.11.1] (A)	--
c26522.graph_c0	0.000129047	-1.26165	down	1.36874e-09	1.30155	up	3.40832e-18	2.56642	up	gi|672272702|gb|KFG44883.1|	calcium dependent protein kinase CDPK7, partial [Toxoplasma gondii GAB2-2007-GAL-DOM2]	Myosin light chain kinase A GN=mlkA OS=Dictyostelium discoideum (Slime mold) PE=1 SV=2	Signal transduction mechanisms	Molecular Function: transferase activity, transferring phosphorus-containing groups (GO:0016772);;	molecular function: catalytic activity (GO:0003824);; biological process: metabolic process (GO:0008152)	K08803|8.23969e-33|xla:431807|dapk1-b, dapk; death-associated protein kinase 1; K08803 death-associated protein kinase [EC:2.7.11.1] (A)	--
c27946.graph_c0	0.029447	-0.626341	normal	0.131867	0.372216	normal	0.000135491	1.00046	up	gi|403334506|gb|EJY66413.1|	Protein kinase domain containing protein [Oxytricha trifallax]	RAC family serine/threonine-protein kinase homolog GN=pkbA OS=Dictyostelium discoideum (Slime mold) PE=1 SV=1	--	Molecular Function: transferase activity, transferring phosphorus-containing groups (GO:0016772);;	molecular function: catalytic activity (GO:0003824);; biological process: metabolic process (GO:0008152)	K13303|1.12833e-68|xtr:100036607|sgk2, h-sgk2; serum/glucocorticoid regulated kinase 2; K13303 serum/glucocorticoid-regulated kinase 2 [EC:2.7.11.1] (A)	FoxO signaling pathway (ko04068)
c30594.graph_c0	9.67167e-05	1.24866	up	1.91714e-07	1.47367	up	0.533033	0.229665	normal	gi|403366577|gb|EJY83091.1|	Wee1 kinase [Oxytricha trifallax]	Membrane-associated tyrosine- and threonine-specific cdc2-inhibitory kinase wee-1.3 OS=Caenorhabditis briggsae PE=3 SV=1	Cell cycle control, cell division, chromosome partitioning	Molecular Function: transferase activity, transferring phosphorus-containing groups (GO:0016772);;	molecular function: catalytic activity (GO:0003824);; biological process: metabolic process (GO:0008152)	K06633|1.29761e-30|cjc:100411457|PKMYT1; protein kinase, membrane associated tyrosine/threonine 1; K06633 membrane-associated tyrosine- and threonine-specific cdc2-inhibitory kinase [EC:2.7.11.1] (A)	Cell cycle (ko04110);; Oocyte meiosis (ko04114);; Progesterone-mediated oocyte maturation (ko04914)
c33965.graph_c0	0.30264	-0.407038	normal	9.95317e-06	-1.23242	down	0.028899	-0.824926	normal	gi|145506731|ref|XP_001439326.1|	hypothetical protein [Paramecium tetraurelia strain d4-2]	Calcium-dependent protein kinase 1 GN=CPK1 OS=Plasmodium falciparum (isolate K1 / Thailand) PE=1 SV=2	Signal transduction mechanisms	Molecular Function: transferase activity, transferring phosphorus-containing groups (GO:0016772);;	molecular function: catalytic activity (GO:0003824);; biological process: metabolic process (GO:0008152)	K08794|6.91254e-27|tad:TRIADDRAFT_49758|hypothetical protein; K08794 calcium/calmodulin-dependent protein kinase I [EC:2.7.11.17] (A)	--
c33967.graph_c0	0.000760798	-0.990215	normal	2.71167e-11	1.841	up	4.44456e-21	2.83316	up	gi|672272702|gb|KFG44883.1|	calcium dependent protein kinase CDPK7, partial [Toxoplasma gondii GAB2-2007-GAL-DOM2]	Calcium/calmodulin-dependent protein kinase type 1 {ECO:0000303|PubMed:10428833} GN=cmk-1 OS=Caenorhabditis elegans PE=1 SV=1	Signal transduction mechanisms	Molecular Function: transferase activity, transferring phosphorus-containing groups (GO:0016772);;	molecular function: catalytic activity (GO:0003824);; biological process: metabolic process (GO:0008152)	K08795|8.10154e-42|xla:398621|pnck, bstk3, camk1b; pregnancy up-regulated nonubiquitous CaM kinase; K08795 pregnancy upregulated non-ubiquitously expressed CaM kinase [EC:2.7.11.17] (A)	--
c35111.graph_c0	0.720358	0.157019	normal	8.56276e-07	-1.10966	down	1.23119e-05	-1.26223	down	gi|403366754|gb|EJY83182.1|	Protein kinase domain containing protein [Oxytricha trifallax]	Serine/threonine kinase SAD-1 {ECO:0000312|EMBL:AAG50270.1} OS=Caenorhabditis elegans PE=1 SV=2	Signal transduction mechanisms	Molecular Function: transferase activity, transferring phosphorus-containing groups (GO:0016772);;	molecular function: catalytic activity (GO:0003824);; biological process: metabolic process (GO:0008152)	K08798|4.81839e-24|ocu:100340551|serine/threonine-protein kinase MARK2-like; K08798 MAP/microtubule affinity-regulating kinase [EC:2.7.11.1] (A)	--
c35882.graph_c0	0.0592383	-0.810833	normal	8.56179e-08	-1.41291	down	0.127961	-0.599145	normal	gi|123499371|ref|XP_001327610.1|	AGC family protein kinase [Trichomonas vaginalis G3]	RAC family serine/threonine-protein kinase homolog GN=pkbA OS=Dictyostelium discoideum (Slime mold) PE=1 SV=1	Signal transduction mechanisms	Molecular Function: transferase activity, transferring phosphorus-containing groups (GO:0016772);;	molecular function: catalytic activity (GO:0003824);; biological process: metabolic process (GO:0008152)	K04345|1.20064e-34|cjc:100408115|cAMP-dependent protein kinase catalytic subunit gamma-like; K04345 protein kinase A [EC:2.7.11.11] (A)	MAPK signaling pathway (ko04010);; Ras signaling pathway (ko04014);; Calcium signaling pathway (ko04020);; cAMP signaling pathway (ko04024);; Chemokine signaling pathway (ko04062);; Oocyte meiosis (ko04114);; Apoptosis (ko04210);; Adrenergic signaling in cardiomyocytes (ko04261);; Vascular smooth muscle contraction (ko04270);; Wnt signaling pathway (ko04310);; Hedgehog signaling pathway (ko04340)…
c36648.graph_c0	0.399822	-0.311446	normal	2.38048e-06	-1.30647	down	0.00361335	-0.991933	normal	gi|403340844|gb|EJY69716.1|	Serine/threonine protein kinase [Oxytricha trifallax]	Dual specificity tyrosine-phosphorylation-regulated kinase 2 GN=smi35A OS=Drosophila melanogaster (Fruit fly) PE=1 SV=1	General function prediction only	Molecular Function: transferase activity, transferring phosphorus-containing groups (GO:0016772);;	molecular function: catalytic activity (GO:0003824);; biological process: metabolic process (GO:0008152)	K18669|2.62443e-74|lcm:102354211|DYRK4; dual-specificity tyrosine-(Y)-phosphorylation regulated kinase 4; K18669 dual specificity tyrosine-phosphorylation-regulated kinase 2/3/4 [EC:2.7.12.1] (A)	--
c38371.graph_c0	0.637308	-0.210974	normal	5.27584e-05	-1.61594	down	0.00482916	-1.39664	down	gi|403344995|gb|EJY71852.1|	Kelch motif family protein [Oxytricha trifallax]	--	--	Molecular Function: transferase activity, transferring phosphorus-containing groups (GO:0016772);;	molecular function: catalytic activity (GO:0003824);; biological process: metabolic process (GO:0008152)	--	--
c40447.graph_c0	1.62707e-07	1.34487	up	0.000493821	0.877815	normal	0.131964	-0.463853	normal	gi|145513524|ref|XP_001442673.1|	hypothetical protein [Paramecium tetraurelia strain d4-2]	Probable serine/threonine-protein kinase fhkC GN=fhkC OS=Dictyostelium discoideum (Slime mold) PE=3 SV=2	Signal transduction mechanisms	Molecular Function: transferase activity, transferring phosphorus-containing groups (GO:0016772);;	molecular function: catalytic activity (GO:0003824);; biological process: metabolic process (GO:0008152)	K08794|2.17302e-34|ngi:103751418|Camk1; calcium/calmodulin-dependent protein kinase I; K08794 calcium/calmodulin-dependent protein kinase I [EC:2.7.11.17] (A)	Oxytocin signaling pathway (ko04921)
c41448.graph_c0	0.931854	-0.0652939	normal	0.000957307	-1.13205	down	0.0221314	-1.06778	normal	gi|403332065|gb|EJY65022.1|	hypothetical protein OXYTRI_14830 [Oxytricha trifallax]	Dual specificity tyrosine-phosphorylation-regulated kinase 2 GN=smi35A OS=Drosophila melanogaster (Fruit fly) PE=1 SV=1	General function prediction only	Molecular Function: transferase activity, transferring phosphorus-containing groups (GO:0016772);;	molecular function: catalytic activity (GO:0003824);; biological process: metabolic process (GO:0008152)	K18669|8.86081e-89|aag:AaeL_AAEL001504|Dual specificity tyrosine-phosphorylation-regulated kinase; K18669 dual specificity tyrosine-phosphorylation-regulated kinase 2/3/4 [EC:2.7.12.1] (A)	--
c41496.graph_c0	0.165629	0.643887	normal	1.63908e-08	1.75326	up	0.00178655	1.11528	up	gi|403347958|gb|EJY73408.1|	Protein kinase domain containing protein [Oxytricha trifallax]	Serine/threonine-protein kinase par-1 {ECO:0000250|UniProtKB:Q9TW45, ECO:0000312|EMBL:CAP25402.1} GN=par-1 OS=Caenorhabditis briggsae PE=3 SV=1	Signal transduction mechanisms	Molecular Function: transferase activity, transferring phosphorus-containing groups (GO:0016772);;	molecular function: catalytic activity (GO:0003824);; biological process: metabolic process (GO:0008152)	K08796|2.33419e-30|lcm:102356995|serine/threonine-protein kinase BRSK2-like; K08796 BR serine/threonine kinase [EC:2.7.11.1] (A)	--
c41874.graph_c0	0.000607018	-1.20446	down	0.146531	-0.494897	normal	0.121043	0.717102	normal	gi|403340037|gb|EJY69285.1|	Serine/threonine protein kinase [Oxytricha trifallax]	Casein kinase I isoform alpha GN=kin-19 OS=Caenorhabditis elegans PE=3 SV=1	Signal transduction mechanisms	Molecular Function: transferase activity, transferring phosphorus-containing groups (GO:0016772);;	molecular function: catalytic activity (GO:0003824);; biological process: metabolic process (GO:0008152)	--	--
c43380.graph_c0	0.663195	-0.191223	normal	7.93184e-21	-2.88065	down	2.54498e-18	-2.68562	down	gi|678317104|emb|CDW85970.1|	protein kinase domain containing protein [Stylonychia lemnae]	Serine/threonine-protein kinase kin-29 OS=Caenorhabditis briggsae PE=3 SV=2	Signal transduction mechanisms	Molecular Function: transferase activity, transferring phosphorus-containing groups (GO:0016772);;	molecular function: catalytic activity (GO:0003824);; biological process: metabolic process (GO:0008152)	K08802|1.42948e-33|pbi:103068097|SNF-related serine/threonine-protein kinase-like; K08802 SNF related kinase [EC:2.7.11.1] (A)	--
c43821.graph_c0	0.0425349	-0.805965	normal	0.000109808	-1.26984	down	0.404702	-0.466262	normal	gi|403331728|gb|EJY64829.1|	3-phosphoinositide-dependent protein kinase 1 [Oxytricha trifallax]	3-phosphoinositide-dependent protein kinase 1 GN=Pdk1 OS=Drosophila melanogaster (Fruit fly) PE=1 SV=4	Signal transduction mechanisms	Molecular Function: transferase activity, transferring phosphorus-containing groups (GO:0016772);;	molecular function: catalytic activity (GO:0003824);; biological process: metabolic process (GO:0008152)	K06276|1.08457e-39|api:100159966|3-phosphoinositide-dependent protein kinase 1; K06276 3-phosphoinositide dependent protein kinase-1 [EC:2.7.11.1] (A)	FoxO signaling pathway (ko04068);; mTOR signaling pathway (ko04150)
c44108.graph_c0	0.678107	0.215237	normal	3.16666e-05	1.13066	up	0.00500568	0.919199	normal	gi|118400568|ref|XP_001032606.1|	Protein kinase domain containing protein [Tetrahymena thermophila]	Serine/threonine-protein kinase PLK4 GN=v1g246408 OS=Nematostella vectensis (Starlet sea anemone) PE=3 SV=1	Signal transduction mechanisms	Molecular Function: transferase activity, transferring phosphorus-containing groups (GO:0016772);;	molecular function: catalytic activity (GO:0003824);; biological process: metabolic process (GO:0008152)	--	--
c44760.graph_c0	6.72407e-09	-1.84085	down	0.723747	-0.1098	normal	3.90973e-08	1.7346	up	gi|403366754|gb|EJY83182.1|	Protein kinase domain containing protein [Oxytricha trifallax]	Serine/threonine-protein kinase par-1 {ECO:0000250|UniProtKB:Q9TW45, ECO:0000312|EMBL:CAP25402.1} GN=par-1 OS=Caenorhabditis briggsae PE=3 SV=1	Signal transduction mechanisms	Molecular Function: transferase activity, transferring phosphorus-containing groups (GO:0016772);;	molecular function: catalytic activity (GO:0003824);; biological process: metabolic process (GO:0008152)	K08798|5.86241e-32|ngi:103727828|sperm motility kinase 2B-like; K08798 MAP/microtubule affinity-regulating kinase [EC:2.7.11.1] (A)	--
c45078.graph_c0	4.89472e-06	-1.24132	down	0.0145491	-0.621892	normal	0.0626804	0.620895	normal	gi|403374494|gb|EJY87202.1|	Calcium-dependent protein kinase, putative [Oxytricha trifallax]	Calcium-dependent protein kinase 2 GN=CPK2 OS=Plasmodium falciparum (isolate K1 / Thailand) PE=1 SV=3	Signal transduction mechanisms	Molecular Function: transferase activity, transferring phosphorus-containing groups (GO:0016772);;	molecular function: catalytic activity (GO:0003824);; biological process: metabolic process (GO:0008152)	K13412|7.38459e-50|mcc:100425952|calcium-dependent protein kinase 2-like; K13412 calcium-dependent protein kinase [EC:2.7.11.1] (A)	Toxoplasmosis (ko05145)
c46662.graph_c0	0.000168052	-1.15331	down	1.04876e-06	-1.30554	down	0.783428	-0.146574	normal	gi|586724010|gb|EAS07533.2|	kinase domain protein [Tetrahymena thermophila SB210]	Casein kinase I OS=Eimeria tenella (Coccidian parasite) PE=2 SV=1	Signal transduction mechanisms	Molecular Function: transferase activity, transferring phosphorus-containing groups (GO:0016772);;	molecular function: catalytic activity (GO:0003824);; biological process: metabolic process (GO:0008152)	K08957|3.50966e-16|dgr:Dgri_GH10150|GH10150 gene product from transcript GH10150-RA; K08957 casein kinase 1, alpha [EC:2.7.11.1] (A)	Wnt signaling pathway (ko04310);; Hedgehog signaling pathway (ko04340)
c47165.graph_c0	0.139838	0.665186	normal	3.33217e-20	2.47904	up	7.36087e-09	1.81679	up	gi|260799939|ref|XP_002594908.1|	hypothetical protein BRAFLDRAFT_110776 [Branchiostoma floridae]	Serine/threonine-protein kinase par-1 {ECO:0000303|PubMed:7758115, ECO:0000312|EMBL:CAB54263.1} OS=Caenorhabditis elegans PE=1 SV=1	--	Molecular Function: transferase activity, transferring phosphorus-containing groups (GO:0016772);;	molecular function: catalytic activity (GO:0003824);; biological process: metabolic process (GO:0008152)	K08269|1.17794e-41|bfo:BRAFLDRAFT_110776|hypothetical protein; K08269 serine/threonine-protein kinase ULK/ATG1 [EC:2.7.11.1] (A)	Regulation of autophagy (ko04140);; mTOR signaling pathway (ko04150)
c48095.graph_c0	3.75364e-10	4.05808	up	--	--	--	5.82451e-07	-3.34627	down	gi|557151767|emb|CDJ44450.1|	CAM kinase, CDPK family, putative, partial [Eimeria tenella]	Calcium-dependent protein kinase 3 GN=CPK3 OS=Plasmodium falciparum (isolate 3D7) PE=1 SV=1	Signal transduction mechanisms	Molecular Function: transferase activity, transferring phosphorus-containing groups (GO:0016772);;	molecular function: catalytic activity (GO:0003824);; biological process: metabolic process (GO:0008152)	K13412|3.5861e-13|mcc:100425952|calcium-dependent protein kinase 2-like; K13412 calcium-dependent protein kinase [EC:2.7.11.1] (A)	Toxoplasmosis (ko05145)
c48176.graph_c1	0.106397	-0.489515	normal	3.29215e-24	-2.35147	down	9.24491e-12	-1.85834	down	gi|145531062|ref|XP_001451303.1|	hypothetical protein [Paramecium tetraurelia strain d4-2]	Serine/threonine-protein kinase par-1 {ECO:0000250|UniProtKB:Q9TW45, ECO:0000312|EMBL:CAP25402.1} GN=par-1 OS=Caenorhabditis briggsae PE=3 SV=1	Signal transduction mechanisms	Molecular Function: transferase activity, transferring phosphorus-containing groups (GO:0016772);;	molecular function: catalytic activity (GO:0003824);; biological process: metabolic process (GO:0008152)	K08798|5.73507e-14|hro:HELRODRAFT_86903|hypothetical protein; K08798 MAP/microtubule affinity-regulating kinase [EC:2.7.11.1] (A)	--
c48453.graph_c0	0.000135145	-1.09715	down	7.80194e-07	-1.23217	down	0.786844	-0.130576	normal	gi|685830350|emb|CEF65272.1|	Protein kinase domain and Serine/threonine-/dual specificity protein kinase, catalytic domain and Protein kinase-like domain-containing protein [Strongyloides ratti]	Probable serine/threonine-protein kinase DDB_G0292354 GN=DDB_G0292354 OS=Dictyostelium discoideum (Slime mold) PE=3 SV=1	Signal transduction mechanisms	Molecular Function: transferase activity, transferring phosphorus-containing groups (GO:0016772);;	molecular function: catalytic activity (GO:0003824);; biological process: metabolic process (GO:0008152)	--	--
c48748.graph_c0	0.0143974	-1.00231	normal	8.03765e-05	-1.12735	down	0.844515	-0.124861	normal	gi|678320044|emb|CDW84444.1|	male germ cell-associated kinase [Stylonychia lemnae]	Probable serine/threonine-protein kinase DDB_G0268078 GN=DDB_G0268078 OS=Dictyostelium discoideum (Slime mold) PE=3 SV=1	Signal transduction mechanisms	Molecular Function: transferase activity, transferring phosphorus-containing groups (GO:0016772);;	molecular function: catalytic activity (GO:0003824);; biological process: metabolic process (GO:0008152)	K08829|2.97108e-48|cbr:CBG22182|Cbr-dyf-5; C. briggsae CBR-DYF-5 protein; K08829 male germ cell-associated kinase [EC:2.7.11.22] (A)	--
c50403.graph_c0	0.00234963	-1.11396	down	0.000415467	-1.11643	down	1	0.000194146	normal	gi|145486363|ref|XP_001429188.1|	hypothetical protein [Paramecium tetraurelia strain d4-2]	Casein kinase I OS=Toxoplasma gondii PE=2 SV=1	Signal transduction mechanisms	Molecular Function: transferase activity, transferring phosphorus-containing groups (GO:0016772);;	molecular function: catalytic activity (GO:0003824);; biological process: metabolic process (GO:0008152)	K08958|1.0051e-38|shr:100913453|CSNK1G1; casein kinase 1, gamma 1; K08958 casein kinase 1, gamma [EC:2.7.11.1] (A)	Hedgehog signaling pathway (ko04340)
c50429.graph_c0	0.291959	0.413573	normal	6.29307e-08	1.24633	up	0.006003	0.835801	normal	gi|586741019|gb|EAR92758.3|	phosphatidylinositol 3- and 4-kinase [Tetrahymena thermophila SB210]	Phosphatidylinositol 3-kinase 2 GN=pikB OS=Dictyostelium discoideum (Slime mold) PE=2 SV=2	Signal transduction mechanisms	Molecular Function: transferase activity, transferring phosphorus-containing groups (GO:0016772);;	molecular function: catalytic activity (GO:0003824);; biological process: metabolic process (GO:0008152)	K00922|3.75121e-32|rno:298947|Pik3cg, Pi3k; phosphatidylinositol-4,5-bisphosphate 3-kinase, catalytic subunit gamma; K00922 phosphatidylinositol-4,5-bisphosphate 3-kinase [EC:2.7.1.153] (A)	Inositol phosphate metabolism (ko00562);; ErbB signaling pathway (ko04012);; Ras signaling pathway (ko04014);; Rap1 signaling pathway (ko04015);; cGMP-PKG signaling pathway (ko04022);; cAMP signaling pathway (ko04024);; Chemokine signaling pathway (ko04062);; HIF-1 signaling pathway (ko04066);; FoxO signaling pathway (ko04068);; Phosphatidylinositol signaling system (ko04070);; Sphingolipid signa…
c50814.graph_c1	0.500708	-0.310897	normal	0.00074689	-1.06664	down	0.0682705	-0.756635	normal	gi|678329696|emb|CDW79520.1|	protein kinase domain containing protein [Stylonychia lemnae]	5&apos;-AMP-activated protein kinase catalytic subunit alpha-2 GN=aak-2 OS=Caenorhabditis elegans PE=1 SV=2	Signal transduction mechanisms	Molecular Function: transferase activity, transferring phosphorus-containing groups (GO:0016772);;	molecular function: catalytic activity (GO:0003824);; biological process: metabolic process (GO:0008152)	K07198|3.52736e-53|lgi:LOTGIDRAFT_233053|hypothetical protein; K07198 5'-AMP-activated protein kinase, catalytic alpha subunit [EC:2.7.11.11] (A)	FoxO signaling pathway (ko04068);; Regulation of autophagy (ko04140);; mTOR signaling pathway (ko04150)
c50899.graph_c0	0.817825	0.109203	normal	0.00266341	-0.904986	normal	0.00622443	-1.0114	down	gi|678315234|emb|CDW86934.1|	protein kinase domain containing protein [Stylonychia lemnae]	Probable serine/threonine-protein kinase nek2 GN=nek2 OS=Dictyostelium discoideum (Slime mold) PE=1 SV=1	Cell cycle control, cell division, chromosome partitioning	Molecular Function: transferase activity, transferring phosphorus-containing groups (GO:0016772);;	molecular function: catalytic activity (GO:0003824);; biological process: metabolic process (GO:0008152)	K08857|6.54665e-35|bmy:Bm1_31880|Serine/threonine-protein kinase Nek7; K08857 NIMA (never in mitosis gene a)-related kinase [EC:2.7.11.1] (A)	--
c50935.graph_c0	0.00271902	-1.02055	down	0.0127927	-0.701475	normal	0.492585	0.328861	normal	gi|675367596|gb|KFM60498.1|	Protein kinase DC2, partial [Stegodyphus mimosarum]	Protein kinase DC2 GN=Pka-C3 OS=Drosophila melanogaster (Fruit fly) PE=2 SV=2	Signal transduction mechanisms	Molecular Function: transferase activity, transferring phosphorus-containing groups (GO:0016772);;	molecular function: catalytic activity (GO:0003824);; biological process: metabolic process (GO:0008152)	K04345|2.34334e-60|ngi:103747214|Prkx; protein kinase, X-linked; K04345 protein kinase A [EC:2.7.11.11] (A)	MAPK signaling pathway (ko04010);; Ras signaling pathway (ko04014);; Calcium signaling pathway (ko04020);; cAMP signaling pathway (ko04024);; Chemokine signaling pathway (ko04062);; Oocyte meiosis (ko04114);; Apoptosis (ko04210);; Adrenergic signaling in cardiomyocytes (ko04261);; Vascular smooth muscle contraction (ko04270);; Wnt signaling pathway (ko04310);; Hedgehog signaling pathway (ko04340)…
c51139.graph_c1	1.28026e-05	1.90951	up	1.95672e-05	1.73246	up	0.698959	-0.177626	normal	gi|403368372|gb|EJY84018.1|	Protein kinase domain containing protein [Oxytricha trifallax]	Probable serine/threonine-protein kinase nek2 GN=nek2 OS=Dictyostelium discoideum (Slime mold) PE=1 SV=1	General function prediction only	Molecular Function: transferase activity, transferring phosphorus-containing groups (GO:0016772);;	molecular function: catalytic activity (GO:0003824);; biological process: metabolic process (GO:0008152)	--	--
c51546.graph_c0	0.497635	0.342125	normal	0.000266538	1.16427	up	0.0334762	0.825509	normal	gi|678307687|emb|CDW90798.1|	protein kinase domain containing protein [Stylonychia lemnae]	--	General function prediction only	Molecular Function: transferase activity, transferring phosphorus-containing groups (GO:0016772);;	molecular function: catalytic activity (GO:0003824);; biological process: metabolic process (GO:0008152)	K08857|3.50179e-07|phi:102103915|NEK2; NIMA-related kinase 2; K08857 NIMA (never in mitosis gene a)-related kinase [EC:2.7.11.1] (A)	--
c51828.graph_c0	0.581366	-0.305049	normal	0.00196077	1.02836	up	1.24863e-06	1.33457	up	gi|403375869|gb|EJY87911.1|	DNA-dependent protein kinase subunit [Oxytricha trifallax]	DNA-dependent protein kinase catalytic subunit GN=dnapkcs OS=Dictyostelium discoideum (Slime mold) PE=3 SV=2	Replication, recombination and repair	Molecular Function: transferase activity, transferring phosphorus-containing groups (GO:0016772);;	molecular function: catalytic activity (GO:0003824);; biological process: metabolic process (GO:0008152)	K06642|3.15188e-109|aqu:100633457|Prkdc; protein kinase, DNA-activated, catalytic polypeptide; K06642 DNA-dependent protein kinase catalytic subunit [EC:2.7.11.1] (A)	Non-homologous end-joining (ko03450)
c52342.graph_c0	0.33663	-0.324857	normal	1.31099e-08	-1.33306	down	0.0001638	-1.00373	down	gi|678330635|emb|CDW79030.1|	serine threonine protein kinase [Stylonychia lemnae]	Serine/threonine-protein kinase pakA GN=pakA OS=Dictyostelium discoideum (Slime mold) PE=1 SV=1	Signal transduction mechanisms	Molecular Function: transferase activity, transferring phosphorus-containing groups (GO:0016772);;	molecular function: catalytic activity (GO:0003824);; biological process: metabolic process (GO:0008152)	K04409|5.52623e-51|cin:100178153|serine/threonine-protein kinase PAK 1; K04409 p21-activated kinase 1 [EC:2.7.11.1] (A)	--
c52663.graph_c0	0.244062	0.455836	normal	0.00100018	-0.827942	normal	4.6769e-05	-1.28259	down	gi|678319179|emb|CDW84880.1|	protein kinase domain containing protein [Stylonychia lemnae]	Serine/threonine-protein kinase par-1 {ECO:0000250|UniProtKB:Q9TW45, ECO:0000312|EMBL:CAP25402.1} GN=par-1 OS=Caenorhabditis briggsae PE=3 SV=1	Signal transduction mechanisms	Molecular Function: transferase activity, transferring phosphorus-containing groups (GO:0016772);;	molecular function: catalytic activity (GO:0003824);; biological process: metabolic process (GO:0008152)	K08798|1.20236e-36|dsi:Dsim_GD20665|GD20665 gene product from transcript GD20665-RA; K08798 MAP/microtubule affinity-regulating kinase [EC:2.7.11.1] (A)	--
c52722.graph_c0	1.30482e-07	-1.41594	down	0.000157393	-0.853899	normal	0.0616376	0.567327	normal	gi|678319241|emb|CDW84848.1|	mitogen-activated protein kinase kinase kinase 3-like [Stylonychia lemnae]	Mitogen-activated protein kinase kinase kinase A {ECO:0000303|PubMed:9832508} OS=Dictyostelium discoideum (Slime mold) PE=1 SV=2	Signal transduction mechanisms	Molecular Function: transferase activity, transferring phosphorus-containing groups (GO:0016772);;	molecular function: catalytic activity (GO:0003824);; biological process: metabolic process (GO:0008152)	K17533|7.20653e-46|lgi:LOTGIDRAFT_64389|hypothetical protein; K17533 mitogen-activated protein kinase kinase kinase 19 [EC:2.7.11.1] (A)	--
c52943.graph_c0	0.00115141	1.1048	up	1.78303e-08	1.63475	up	0.0690731	0.535962	normal	gi|586737434|gb|EAR96626.2|	MORN motif protein [Tetrahymena thermophila SB210]	--	General function prediction only	Molecular Function: transferase activity, transferring phosphorus-containing groups (GO:0016772);;	molecular function: catalytic activity (GO:0003824);; biological process: metabolic process (GO:0008152)	--	--
c53108.graph_c0	0.998136	-0.00593042	normal	3.76773e-11	-1.63049	down	1.89636e-11	-1.61945	down	gi|294715514|gb|ADF30848.1|	testis-specific serine kinase 1 [Euplotes aediculatus]	Probable serine/threonine-protein kinase MARK-C GN=mrkC OS=Dictyostelium discoideum (Slime mold) PE=3 SV=1	Signal transduction mechanisms	Molecular Function: transferase activity, transferring phosphorus-containing groups (GO:0016772);;	molecular function: catalytic activity (GO:0003824);; biological process: metabolic process (GO:0008152)	K07359|1.77021e-26|clv:102093372|CAMKK1; calcium/calmodulin-dependent protein kinase kinase 1, alpha; K07359 calcium/calmodulin-dependent protein kinase kinase [EC:2.7.11.17] (A)	Adipocytokine signaling pathway (ko04920)
c54016.graph_c0	0.633258	-0.226293	normal	4.72546e-31	-3.40023	down	3.1762e-24	-3.16911	down	gi|678317104|emb|CDW85970.1|	protein kinase domain containing protein [Stylonychia lemnae]	Probable serine/threonine-protein kinase MARK-C GN=mrkC OS=Dictyostelium discoideum (Slime mold) PE=3 SV=1	Signal transduction mechanisms	Molecular Function: transferase activity, transferring phosphorus-containing groups (GO:0016772);;	molecular function: catalytic activity (GO:0003824);; biological process: metabolic process (GO:0008152)	K08798|7.06624e-30|cge:100752318|sperm motility kinase Z; K08798 MAP/microtubule affinity-regulating kinase [EC:2.7.11.1] (A)	--
c54516.graph_c0	5.38386e-06	-1.23444	down	0.0064627	-0.613768	normal	0.0370714	0.622861	normal	gi|403366754|gb|EJY83182.1|	Protein kinase domain containing protein [Oxytricha trifallax]	Serine/threonine-protein kinase par-1 {ECO:0000250|UniProtKB:Q9TW45, ECO:0000312|EMBL:CAP25402.1} GN=par-1 OS=Caenorhabditis briggsae PE=3 SV=1	Signal transduction mechanisms	Molecular Function: transferase activity, transferring phosphorus-containing groups (GO:0016772);;	molecular function: catalytic activity (GO:0003824);; biological process: metabolic process (GO:0008152)	K08798|6.44247e-37|acs:100553482|mark4; MAP/microtubule affinity-regulating kinase 4; K08798 MAP/microtubule affinity-regulating kinase [EC:2.7.11.1] (A)	--
c54853.graph_c0	1.06066e-06	1.24366	up	0.020371	0.535655	normal	0.00828004	-0.704033	normal	gi|403344404|gb|EJY71545.1|	Protein kinase domain containing protein [Oxytricha trifallax]	RAC serine/threonine-protein kinase GN=Akt1 OS=Drosophila melanogaster (Fruit fly) PE=1 SV=3	Signal transduction mechanisms	Molecular Function: transferase activity, transferring phosphorus-containing groups (GO:0016772);;	molecular function: catalytic activity (GO:0003824);; biological process: metabolic process (GO:0008152)	K04456|8.72175e-81|dpo:Dpse_GA17848|GA17848 gene product from transcript GA17848-RB (EC:2.7.11.-); K04456 RAC serine/threonine-protein kinase [EC:2.7.11.1] (A)	FoxO signaling pathway (ko04068);; mTOR signaling pathway (ko04150);; Jak-STAT signaling pathway (ko04630)
c54886.graph_c0	0.0087584	-0.738974	normal	1.40372e-09	-1.30098	down	0.0361505	-0.557507	normal	gi|678324259|emb|CDW82279.1|	protein kinase domain containing protein [Stylonychia lemnae]	Serine/threonine-protein kinase par-1 {ECO:0000250|UniProtKB:Q9TW45, ECO:0000312|EMBL:CAP25402.1} GN=par-1 OS=Caenorhabditis briggsae PE=3 SV=1	General function prediction only	Molecular Function: transferase activity, transferring phosphorus-containing groups (GO:0016772);;	molecular function: catalytic activity (GO:0003824);; biological process: metabolic process (GO:0008152)	K08798|3.91663e-36|ngi:103727828|sperm motility kinase 2B-like; K08798 MAP/microtubule affinity-regulating kinase [EC:2.7.11.1] (A)	--
c54301.graph_c0	2.60612e-09	-1.53958	down	5.41626e-25	-2.50175	down	0.00492654	-0.958209	normal	gi|403342865|gb|EJY70757.1|	Phosphoribosyl transferase domain containing protein [Oxytricha trifallax]	Uracil phosphoribosyltransferase GN=uprt OS=Dictyostelium discoideum (Slime mold) PE=3 SV=1	--	Molecular Function: transferase activity, transferring glycosyl groups (GO:0016757);;	molecular function: catalytic activity (GO:0003824);; biological process: metabolic process (GO:0008152)	K00761|1.91802e-44|hmg:100202696|uracil phosphoribosyltransferase-like; K00761 uracil phosphoribosyltransferase [EC:2.4.2.9] (A)	Pyrimidine metabolism (ko00240)
c31767.graph_c0	0.00284213	0.833113	normal	2.84607e-06	1.04455	up	0.475575	0.214565	normal	gi|118380071|ref|XP_001023200.1|	Zinc finger, ZZ type family protein [Tetrahymena thermophila]	Protein ref(2)P GN=ref(2)P OS=Drosophila simulans (Fruit fly) PE=3 SV=1	Function unknown	Molecular Function: transferase activity, transferring acyl groups (GO:0016746);; Molecular Function: nucleotidyltransferase activity (GO:0016779);; Molecular Function: hydrolase activity (GO:0016787);; Molecular Function: metal ion binding (GO:0046872);;	molecular function: catalytic activity (GO:0003824);; biological process: metabolic process (GO:0008152);; molecular function: binding (GO:0005488)	--	--
c48353.graph_c0	6.99228e-09	1.46567	up	2.39841e-05	0.948983	normal	0.0584433	-0.513007	normal	gi|471218664|ref|XP_004023870.1|	zinc ZZ type family protein, putative [Ichthyophthirius multifiliis]	Protein ref(2)P GN=ref(2)P OS=Drosophila melanogaster (Fruit fly) PE=1 SV=2	Function unknown	Molecular Function: transferase activity, transferring acyl groups (GO:0016746);; Molecular Function: nucleotidyltransferase activity (GO:0016779);; Molecular Function: hydrolase activity (GO:0016787);; Molecular Function: metal ion binding (GO:0046872);;	molecular function: catalytic activity (GO:0003824);; biological process: metabolic process (GO:0008152);; molecular function: binding (GO:0005488)	--	--
c45909.graph_c0	0.734191	-0.147403	normal	0.000243423	0.893659	normal	0.000166238	1.0443	up	gi|403361920|gb|EJY80674.1|	Glycylpeptide N-tetradecanoyltransferase [Oxytricha trifallax]	Glycylpeptide N-tetradecanoyltransferase GN=nmt OS=Dictyostelium discoideum (Slime mold) PE=3 SV=2	Lipid transport and metabolism	Molecular Function: transferase activity, transferring acyl groups (GO:0016746);;	molecular function: catalytic activity (GO:0003824);; biological process: metabolic process (GO:0008152)	K00671|9.47464e-114|aqu:100637114|glycylpeptide N-tetradecanoyltransferase 2-like; K00671 glycylpeptide N-tetradecanoyltransferase [EC:2.3.1.97] (A)	--
c26809.graph_c0	0.253022	-0.732637	normal	6.63262e-11	2.02837	up	2.70706e-14	2.76691	up	gi|403350390|gb|EJY74655.1|	ATPase, AAA family protein [Oxytricha trifallax]	Probable replication factor C subunit 4 GN=rfc4 OS=Dictyostelium discoideum (Slime mold) PE=3 SV=1	Replication, recombination and repair	Molecular Function: transferase activity (GO:0016740);; Molecular Function: organic cyclic compound binding (GO:0097159);; Molecular Function: heterocyclic compound binding (GO:1901363);;	molecular function: catalytic activity (GO:0003824);; biological process: metabolic process (GO:0008152);; molecular function: binding (GO:0005488)	K10755|8.13459e-98|spu:582287|replication factor C subunit 4-like; K10755 replication factor C subunit 2/4 (A)	DNA replication (ko03030);; Nucleotide excision repair (ko03420);; Mismatch repair (ko03430)
c49893.graph_c0	0.400037	-0.397783	normal	4.73903e-11	1.56331	up	3.60023e-09	1.96309	up	gi|678308463|emb|CDW90396.1|	dna polymerase delta catalytic subunit-like [Stylonychia lemnae]	DNA polymerase delta catalytic subunit GN=pold1 OS=Dictyostelium discoideum (Slime mold) PE=3 SV=1	Replication, recombination and repair	Molecular Function: transferase activity (GO:0016740);; Molecular Function: organic cyclic compound binding (GO:0097159);; Molecular Function: heterocyclic compound binding (GO:1901363);;	molecular function: catalytic activity (GO:0003824);; biological process: metabolic process (GO:0008152);; molecular function: binding (GO:0005488)	K02327|0|tru:101069965|DNA polymerase delta catalytic subunit-like; K02327 DNA polymerase delta subunit 1 [EC:2.7.7.7] (A)	Purine metabolism (ko00230);; Pyrimidine metabolism (ko00240);; DNA replication (ko03030);; Base excision repair (ko03410);; Nucleotide excision repair (ko03420);; Mismatch repair (ko03430);; Homologous recombination (ko03440)
c51127.graph_c0	0.895988	0.0885779	normal	6.78281e-07	1.59776	up	4.21365e-06	1.509	up	gi|71841808|gb|AAZ43187.1|	DNA polymerase alpha [Euplotes octocarinatus]	DNA polymerase alpha catalytic subunit OS=Sterkiella nova (Ciliate) PE=3 SV=1	Replication, recombination and repair	Molecular Function: transferase activity (GO:0016740);; Molecular Function: organic cyclic compound binding (GO:0097159);; Molecular Function: heterocyclic compound binding (GO:1901363);;	molecular function: catalytic activity (GO:0003824);; biological process: metabolic process (GO:0008152);; molecular function: binding (GO:0005488)	K02320|0|spu:584095|DNA polymerase alpha catalytic subunit-like; K02320 DNA polymerase alpha subunit A [EC:2.7.7.7] (A)	Purine metabolism (ko00230);; Pyrimidine metabolism (ko00240);; DNA replication (ko03030)
c20201.graph_c0	0.146269	0.526873	normal	4.3869e-07	1.28082	up	0.0111196	0.755292	normal	gi|403342859|gb|EJY70754.1|	Poly [ADP-ribose] polymerase 2 [Oxytricha trifallax]	Poly [ADP-ribose] polymerase OS=Sarcophaga peregrina (Flesh fly) PE=1 SV=1	--	Molecular Function: transferase activity (GO:0016740);; Molecular Function: organic cyclic compound binding (GO:0097159);; Molecular Function: heterocyclic compound binding (GO:1901363);;	molecular function: catalytic activity (GO:0003824);; biological process: metabolic process (GO:0008152);; molecular function: binding (GO:0005488)	K10798|4.0824e-88|mze:101468994|poly [ADP-ribose] polymerase 2-like; K10798 poly [ADP-ribose] polymerase [EC:2.4.2.30] (A)	Base excision repair (ko03410)
c41798.graph_c0	0.854018	-0.0775883	normal	4.58933e-07	-1.08233	down	3.91373e-05	-1.00119	down	gi|678319286|emb|CDW84823.1|	dynein intermediate chain [Stylonychia lemnae]	Dynein intermediate chain 3, ciliary OS=Heliocidaris crassispina (Sea urchin) PE=2 SV=1	Cytoskeleton	Molecular Function: transferase activity (GO:0016740);; Molecular Function: hydrolase activity (GO:0016787);;	molecular function: catalytic activity (GO:0003824);; biological process: metabolic process (GO:0008152)	K11143|3.57446e-149|tad:TRIADDRAFT_20628|hypothetical protein; K11143 dynein intermediate chain 2, axonemal (A)	--
c48918.graph_c0	0.585951	-0.393048	normal	0.00521585	-1.14776	down	0.247656	-0.75406	normal	gi|586734101|gb|EAS00133.2|	phospholipid-translocating P-type ATPase, flippase family protein [Tetrahymena thermophila SB210]	Hybrid signal transduction histidine kinase B GN=dhkB OS=Dictyostelium discoideum (Slime mold) PE=1 SV=1	Signal transduction mechanisms	Molecular Function: transferase activity (GO:0016740);; Biological Process: single-organism process (GO:0044699);; Biological Process: regulation of cellular process (GO:0050794);;	molecular function: catalytic activity (GO:0003824);; biological process: metabolic process (GO:0008152);; biological process: single-organism process (GO:0044699);; biological process: biological regulation (GO:0065007)	--	--
c22157.graph_c0	1.92164e-06	-1.22507	down	0.00112588	-0.768161	normal	0.163577	0.459333	normal	gi|260816181|ref|XP_002602850.1|	hypothetical protein BRAFLDRAFT_128944 [Branchiostoma floridae]	Katanin p80 WD40 repeat-containing subunit B1 {ECO:0000255|HAMAP-Rule:MF_03022} OS=Strongylocentrotus purpuratus (Purple sea urchin) PE=1 SV=1	Cell cycle control, cell division, chromosome partitioning	Molecular Function: transferase activity (GO:0016740);; Biological Process: single-organism cellular process (GO:0044763);;	molecular function: catalytic activity (GO:0003824);; biological process: metabolic process (GO:0008152);; biological process: cellular process (GO:0009987);; biological process: single-organism process (GO:0044699)	K18643|2.68827e-35|bfo:BRAFLDRAFT_128944|hypothetical protein; K18643 katanin p80 WD40 repeat-containing subunit B1 (A)	--
c38631.graph_c0	0.00150011	-1.15435	down	0.879322	0.0606833	normal	0.00165713	1.21584	up	gi|470240230|ref|XP_004354106.1|	histidine kinase [Dictyostelium fasciculatum]	Hybrid signal transduction histidine kinase K GN=dhkK OS=Dictyostelium discoideum (Slime mold) PE=1 SV=1	Signal transduction mechanisms	Molecular Function: transferase activity (GO:0016740);; Biological Process: regulation of cellular process (GO:0050794);;	molecular function: catalytic activity (GO:0003824);; biological process: metabolic process (GO:0008152);; biological process: biological regulation (GO:0065007)	--	--
c49114.graph_c0	0.00617061	-0.910858	normal	0.000429975	-1.0191	down	0.825933	-0.104213	normal	gi|403331778|gb|EJY64856.1|	Multi-sensor hybrid histidine kinase [Oxytricha trifallax]	Hybrid signal transduction histidine kinase B GN=dhkB OS=Dictyostelium discoideum (Slime mold) PE=1 SV=1	Signal transduction mechanisms	Molecular Function: transferase activity (GO:0016740);; Biological Process: regulation of cellular process (GO:0050794);;	molecular function: catalytic activity (GO:0003824);; biological process: metabolic process (GO:0008152);; biological process: biological regulation (GO:0065007)	--	--
c28047.graph_c0	0.16826	0.427059	normal	2.21612e-10	1.42296	up	0.000120359	1	up	gi|403361216|gb|EJY80306.1|	Bifunctional dihydrofolate reductase-thymidylate synthase 2 / DHFR-TS (ISS) [Oxytricha trifallax]	Thymidylate synthase OS=Plasmodium chabaudi PE=3 SV=1	Nucleotide transport and metabolism	Molecular Function: transferase activity (GO:0016740);; Biological Process: heterocycle biosynthetic process (GO:0018130);; Biological Process: aromatic compound biosynthetic process (GO:0019438);; Biological Process: primary metabolic process (GO:0044238);; Biological Process: cellular nitrogen compound biosynthetic process (GO:0044271);; Biological Process: small molecule metabolic process (GO:…	molecular function: catalytic activity (GO:0003824);; biological process: metabolic process (GO:0008152);; biological process: cellular process (GO:0009987);; biological process: single-organism process (GO:0044699)	K00560|1.07711e-133|acs:100559060|tyms; thymidylate synthetase; K00560 thymidylate synthase [EC:2.1.1.45] (A)	Pyrimidine metabolism (ko00240);; One carbon pool by folate (ko00670)
c47093.graph_c0	1.30876e-28	2.87548	up	0.00133266	0.733199	normal	1.42181e-17	-2.13714	down	gi|403343157|gb|EJY70902.1|	Serine hydroxymethyltransferase [Oxytricha trifallax]	Serine hydroxymethyltransferase 1 GN=shmt1 OS=Dictyostelium discoideum (Slime mold) PE=1 SV=1	Amino acid transport and metabolism	Molecular Function: transferase activity (GO:0016740);; Biological Process: alpha-amino acid metabolic process (GO:1901605);;	molecular function: catalytic activity (GO:0003824);; biological process: metabolic process (GO:0008152);; biological process: cellular process (GO:0009987);; biological process: single-organism process (GO:0044699)	K00600|5.97384e-166|bfo:BRAFLDRAFT_285686|hypothetical protein; K00600 glycine hydroxymethyltransferase [EC:2.1.2.1] (A)	Glycine, serine and threonine metabolism (ko00260);; Cyanoamino acid metabolism (ko00460);; Glyoxylate and dicarboxylate metabolism (ko00630);; One carbon pool by folate (ko00670);; Carbon metabolism (ko01200);; Biosynthesis of amino acids (ko01230)
c32669.graph_c0	0.0190422	-0.865799	normal	4.15974e-12	-2.45584	down	0.000749183	-1.59172	down	gi|678343593|emb|CDW72366.1|	s-adenosyl-l-methionine-dependent methyltransferases superfamily protein [Stylonychia lemnae]	tRNA (adenine(58)-N(1))-methyltransferase catalytic subunit trmt61a GN=trmt61a OS=Dictyostelium discoideum (Slime mold) PE=1 SV=1	Translation, ribosomal structure and biogenesis	Molecular Function: transferase activity (GO:0016740);;	molecular function: catalytic activity (GO:0003824);; biological process: metabolic process (GO:0008152)	K07442|7.94787e-49|lgi:LOTGIDRAFT_215674|hypothetical protein; K07442 tRNA (adenine57-N1/adenine58-N1)-methyltransferase [EC:2.1.1.219 2.1.1.220] (A)	--
c48717.graph_c0	0.102121	-0.671982	normal	0.000133122	-1.18877	down	0.241417	-0.51641	normal	gi|403353481|gb|EJY76278.1|	DNA-directed RNA polymerase [Oxytricha trifallax]	DNA-directed RNA polymerase I subunit rpa1 GN=polr1a OS=Dictyostelium discoideum (Slime mold) PE=3 SV=1	Transcription	Molecular Function: transferase activity (GO:0016740);;	molecular function: catalytic activity (GO:0003824);; biological process: metabolic process (GO:0008152)	K02999|5.36472e-129|pbi:103068112|POLR1A; polymerase (RNA) I polypeptide A, 194kDa; K02999 DNA-directed RNA polymerase I subunit RPA1 [EC:2.7.7.6] (A)	Purine metabolism (ko00230);; Pyrimidine metabolism (ko00240);; RNA polymerase (ko03020)
c18978.graph_c0	--	--	--	0.000669088	1.72087	up	0.0638488	1.09211	normal	gi|330812766|ref|XP_003291289.1|	hypothetical protein DICPUDRAFT_8477 [Dictyostelium purpureum]	Endonuclease III homolog {ECO:0000255|HAMAP-Rule:MF_03183} OS=Caenorhabditis elegans PE=1 SV=2	Replication, recombination and repair	Molecular Function: transferase activity (GO:0016740);;	molecular function: catalytic activity (GO:0003824);; biological process: metabolic process (GO:0008152)	K10773|1.324e-35|hro:HELRODRAFT_158200|hypothetical protein; K10773 endonuclease III [EC:4.2.99.18] (A)	Base excision repair (ko03410)
c52821.graph_c0	0.0419389	0.677319	normal	3.16247e-10	1.76468	up	0.000449719	1.08976	up	gi|678312185|emb|CDW88491.1|	arginyl-trna--protein transferase 1 [Stylonychia lemnae]	Arginyl-tRNA--protein transferase 1 GN=ate1 OS=Dictyostelium discoideum (Slime mold) PE=3 SV=1	Posttranslational modification, protein turnover, chaperones	Molecular Function: transferase activity (GO:0016740);;	molecular function: catalytic activity (GO:0003824);; biological process: metabolic process (GO:0008152)	K00685|1.01222e-16|lgi:LOTGIDRAFT_119331|hypothetical protein; K00685 arginine-tRNA-protein transferase [EC:2.3.2.8] (A)	--
c53087.graph_c0	0.43562	-0.490375	normal	0.0332889	0.785039	normal	0.00734037	1.2803	up	gi|678329166|emb|CDW79788.1|	thymidylate kinase [Stylonychia lemnae]	Thymidylate kinase GN=dtymk OS=Dictyostelium discoideum (Slime mold) PE=3 SV=1	Nucleotide transport and metabolism	Molecular Function: transferase activity (GO:0016740);;	molecular function: catalytic activity (GO:0003824);; biological process: metabolic process (GO:0008152)	K00943|2.91371e-57|spu:578930|thymidylate kinase-like; K00943 dTMP kinase [EC:2.7.4.9] (A)	Pyrimidine metabolism (ko00240)
c40537.graph_c0	5.05895e-08	1.50084	up	0.0807645	-0.627759	normal	2.61287e-11	-2.12443	down	gi|403338466|gb|EJY68473.1|	Acyl CoA:acetate/3-ketoacid CoA transferase, alpha subunit [Oxytricha trifallax]	Probable succinyl-CoA:3-ketoacid coenzyme A transferase, mitochondrial (Precursor) GN=oxct1 OS=Dictyostelium discoideum (Slime mold) PE=3 SV=1	Energy production and conversion	Molecular Function: transferase activity (GO:0016740);;	molecular function: catalytic activity (GO:0003824);; biological process: metabolic process (GO:0008152)	K01027|3.15593e-155|cin:100180566|oxct1; succinyl-CoA:3-ketoacid coenzyme A transferase 1, mitochondrial; K01027 3-oxoacid CoA-transferase [EC:2.8.3.5] (A)	Synthesis and degradation of ketone bodies (ko00072);; Valine, leucine and isoleucine degradation (ko00280);; Butanoate metabolism (ko00650)
c45298.graph_c0	0.0047397	-0.806735	normal	8.90044e-17	-1.80812	down	0.000100587	-0.997786	normal	gi|557770076|ref|XP_005184708.1|	PREDICTED: succinyl-CoA:3-ketoacid coenzyme A transferase 1, mitochondrial [Musca domestica]	Probable succinyl-CoA:3-ketoacid coenzyme A transferase, mitochondrial (Precursor) GN=oxct1 OS=Dictyostelium discoideum (Slime mold) PE=3 SV=1	Energy production and conversion	Molecular Function: transferase activity (GO:0016740);;	molecular function: catalytic activity (GO:0003824);; biological process: metabolic process (GO:0008152)	K01027|4.02421e-166|mde:101888363|succinyl-CoA:3-ketoacid coenzyme A transferase 1, mitochondrial-like; K01027 3-oxoacid CoA-transferase [EC:2.8.3.5] (A)	Synthesis and degradation of ketone bodies (ko00072);; Valine, leucine and isoleucine degradation (ko00280);; Butanoate metabolism (ko00650)
c45415.graph_c0	0.627305	0.264626	normal	7.64366e-05	-1.38243	down	6.20382e-05	-1.63784	down	gi|403354964|gb|EJY77042.1|	Acetyl-CoA acetyltransferase [Oxytricha trifallax]	Probable acetyl-CoA acetyltransferase GN=DDB_G0271544 OS=Dictyostelium discoideum (Slime mold) PE=2 SV=1	Lipid transport and metabolism	Molecular Function: transferase activity (GO:0016740);;	molecular function: catalytic activity (GO:0003824);; biological process: metabolic process (GO:0008152)	K00626|1.78153e-136|lgi:LOTGIDRAFT_105979|hypothetical protein; K00626 acetyl-CoA C-acetyltransferase [EC:2.3.1.9] (A)	Fatty acid degradation (ko00071);; Synthesis and degradation of ketone bodies (ko00072);; Valine, leucine and isoleucine degradation (ko00280);; Lysine degradation (ko00310);; Tryptophan metabolism (ko00380);; Pyruvate metabolism (ko00620);; Glyoxylate and dicarboxylate metabolism (ko00630);; Propanoate metabolism (ko00640);; Butanoate metabolism (ko00650);; Terpenoid backbone biosynthesis (ko009…
c35729.graph_c0	0.530039	-0.226215	normal	1.36163e-05	-1.01032	down	0.00621963	-0.781369	normal	gi|470440333|ref|XP_004339288.1|	WD repeat containing protein [Acanthamoeba castellanii str. Neff]	WD repeat domain-containing protein 83 homolog GN=morg1 OS=Dictyostelium discoideum (Slime mold) PE=3 SV=1	Function unknown	Molecular Function: transferase activity (GO:0016740);;	molecular function: catalytic activity (GO:0003824);; biological process: metabolic process (GO:0008152)	K13124|1.48603e-53|tad:TRIADDRAFT_21018|hypothetical protein; K13124 mitogen-activated protein kinase organizer 1 (A)	--
c43214.graph_c0	0.000506178	-1.01282	down	5.14631e-05	-0.98179	normal	0.950549	0.0345018	normal	gi|403348482|gb|EJY73678.1|	U4/U6 small nuclear ribonucleoprotein Prp4, putative [Oxytricha trifallax]	Lissencephaly-1 homolog {ECO:0000255|HAMAP-Rule:MF_03141} OS=Caenorhabditis briggsae PE=3 SV=2	RNA processing and modification	Molecular Function: transferase activity (GO:0016740);;	molecular function: catalytic activity (GO:0003824);; biological process: metabolic process (GO:0008152)	K12662|3.00684e-107|spu:590747|prpf4; PRP4 pre-mRNA processing factor 4 homolog (yeast); K12662 U4/U6 small nuclear ribonucleoprotein PRP4 (A)	Spliceosome (ko03040)
c44387.graph_c0	0.41716	-0.390423	normal	0.00195884	-1.10338	down	0.180168	-0.705248	normal	gi|403364408|gb|EJY81965.1|	hypothetical protein OXYTRI_20516 [Oxytricha trifallax]	--	General function prediction only	Molecular Function: transferase activity (GO:0016740);;	molecular function: catalytic activity (GO:0003824);; biological process: metabolic process (GO:0008152)	K02318|1.35708e-21|loa:LOAG_08818|hypothetical protein; K02318 phosphopantetheine adenylyltransferase / dephospho-CoA kinase [EC:2.7.7.3 2.7.1.24] (A)	Pantothenate and CoA biosynthesis (ko00770)
c49497.graph_c0	4.84195e-06	-1.24408	down	5.05256e-13	-1.74253	down	0.141905	-0.496644	normal	gi|403375645|gb|EJY87798.1|	hypothetical protein OXYTRI_23635 [Oxytricha trifallax]	Variant-silencing SET domain-containing protein GN=SETVS OS=Plasmodium falciparum (isolate 3D7) PE=2 SV=1	--	Molecular Function: transferase activity (GO:0016740);;	molecular function: catalytic activity (GO:0003824);; biological process: metabolic process (GO:0008152)	K15588|3.46718e-09|xtr:100145675|nsd1, ara267, kmt3b, sotos, sto; nuclear receptor binding SET domain protein 1; K15588 histone-lysine N-methyltransferase NSD1 [EC:2.1.1.43] (A)	Lysine degradation (ko00310)
c53845.graph_c0	0.00125286	1.05217	up	0.125276	0.444062	normal	0.087749	-0.601857	normal	gi|678322495|emb|CDW83183.1|	programmed cell death protein 5-like [Stylonychia lemnae]	Uncharacterized protein D2005.3 GN=D2005.3 OS=Caenorhabditis elegans PE=3 SV=2	Cell cycle control, cell division, chromosome partitioning	Molecular Function: transferase activity (GO:0016740);;	molecular function: catalytic activity (GO:0003824);; biological process: metabolic process (GO:0008152)	K06875|7.75464e-11|cbr:CBG08274|Hypothetical protein CBG08274; K06875 programmed cell death protein 5 (A)	--
c25192.graph_c0	0.000188924	1.14639	up	0.00393337	0.823069	normal	0.361368	-0.321489	normal	gi|294944379|ref|XP_002784226.1|	nexus protein 2, putative [Perkinsus marinus ATCC 50983]	--	General function prediction only	Molecular Function: transferase activity (GO:0016740);;	molecular function: catalytic activity (GO:0003824);; biological process: metabolic process (GO:0008152)	--	--
c34376.graph_c0	8.96766e-05	-1.14204	down	0.113917	-0.397224	normal	0.0138023	0.746244	normal	gi|678328874|emb|CDW79939.1|	morn repeat protein [Stylonychia lemnae]	--	General function prediction only	Molecular Function: transferase activity (GO:0016740);;	molecular function: catalytic activity (GO:0003824);; biological process: metabolic process (GO:0008152)	--	--
c38431.graph_c0	--	--	--	4.07841e-08	2.48786	up	0.00145137	1.70471	up	gi|403356333|gb|EJY77757.1|	Putative MORN repeat protein [Oxytricha trifallax]	--	General function prediction only	Molecular Function: transferase activity (GO:0016740);;	molecular function: catalytic activity (GO:0003824);; biological process: metabolic process (GO:0008152)	--	--
c42846.graph_c0	0.018601	-0.800857	normal	2.15776e-13	-2.06871	down	0.00138364	-1.26588	down	gi|290975389|ref|XP_002670425.1|	predicted protein [Naegleria gruberi]	--	Signal transduction mechanisms	Molecular Function: transferase activity (GO:0016740);;	molecular function: catalytic activity (GO:0003824);; biological process: metabolic process (GO:0008152)	--	--
c45070.graph_c0	1.34263e-09	1.54773	up	6.27803e-38	2.91696	up	4.11402e-08	1.37234	up	gi|145485064|ref|XP_001428541.1|	hypothetical protein [Paramecium tetraurelia strain d4-2]	--	General function prediction only	Molecular Function: transferase activity (GO:0016740);;	molecular function: catalytic activity (GO:0003824);; biological process: metabolic process (GO:0008152)	--	--
c51428.graph_c0	0.138991	-0.600229	normal	4.57739e-06	-1.24649	down	0.143107	-0.644352	normal	gi|678344421|emb|CDW71949.1|	UNKNOWN [Stylonychia lemnae]	--	Signal transduction mechanisms	Molecular Function: transferase activity (GO:0016740);;	molecular function: catalytic activity (GO:0003824);; biological process: metabolic process (GO:0008152)	--	--
c52863.graph_c0	0.317894	-0.347455	normal	1.81286e-18	2.10565	up	3.18162e-23	2.45834	up	gi|389602484|ref|XP_001567295.2|	phosphatidylinositol-4-phosphate 5-kinase-like protein [Leishmania braziliensis MHOM/BR/75/M2904]	--	Signal transduction mechanisms	Molecular Function: transferase activity (GO:0016740);;	molecular function: catalytic activity (GO:0003824);; biological process: metabolic process (GO:0008152)	--	--
c52999.graph_c0	0.340294	0.407195	normal	5.39643e-15	2.248	up	1.39876e-12	1.84471	up	gi|401411215|ref|XP_003885055.1|	hypothetical protein NCLIV_054520 [Neospora caninum Liverpool]	Histone-lysine N-methyltransferase SETD7 GN=setd7 OS=Halocynthia roretzi (Sea squirt) PE=2 SV=1	Signal transduction mechanisms	Molecular Function: transferase activity (GO:0016740);;	molecular function: catalytic activity (GO:0003824);; biological process: metabolic process (GO:0008152)	--	--
c54033.graph_c0	0.457186	0.344795	normal	0.00106746	-1.07581	down	0.000181109	-1.4156	down	gi|118358324|ref|XP_001012408.1|	ubiquinone biosynthesis O-methyltransferase family protein [Tetrahymena thermophila]	Hexaprenyldihydroxybenzoate methyltransferase, mitochondrial (Precursor) GN=coq3 OS=Dictyostelium discoideum (Slime mold) PE=3 SV=1	Coenzyme transport and metabolism	Molecular Function: transferase activity (GO:0016740);;	molecular function: catalytic activity (GO:0003824);; biological process: metabolic process (GO:0008152)	K00591|8.9247e-42|mgp:100550124|COQ3; coenzyme Q3 methyltransferase; K00591 polyprenyldihydroxybenzoate methyltransferase / 3-demethylubiquinol 3-O-methyltransferase [EC:2.1.1.114 2.1.1.64] (A)	Ubiquinone and other terpenoid-quinone biosynthesis (ko00130)
c33323.graph_c0	0.252962	0.670402	normal	1.64616e-19	2.7581	up	5.52831e-10	2.093	up	gi|678310892|emb|CDW89133.1|	chitin synthase 1 [Stylonychia lemnae]	--	Cell wall/membrane/envelope biogenesis	Molecular Function: transferase activity (GO:0016740);;	molecular function: catalytic activity (GO:0003824);; biological process: metabolic process (GO:0008152)	--	--
c43531.graph_c0	0.0026151	-1.39076	down	0.0430596	-0.795706	normal	0.143354	0.595666	normal	gi|678316641|emb|CDW86208.1|	UNKNOWN [Stylonychia lemnae]	--	Cell wall/membrane/envelope biogenesis	Molecular Function: transferase activity (GO:0016740);;	molecular function: catalytic activity (GO:0003824);; biological process: metabolic process (GO:0008152)	--	--
c43531.graph_c1	6.19445e-05	-1.19641	down	8.06441e-06	-1.16418	down	0.939686	0.0397084	normal	gi|403348670|gb|EJY73776.1|	Chitin synthase 1 [Oxytricha trifallax]	--	Cell wall/membrane/envelope biogenesis	Molecular Function: transferase activity (GO:0016740);;	molecular function: catalytic activity (GO:0003824);; biological process: metabolic process (GO:0008152)	K00698|2.23837e-18|lgi:LOTGIDRAFT_127716|hypothetical protein; K00698 chitin synthase [EC:2.4.1.16] (A)	Amino sugar and nucleotide sugar metabolism (ko00520)
c54838.graph_c0	0.0093937	1.21497	up	0.00530298	1.09234	up	0.838594	-0.120783	normal	gi|403353802|gb|EJY76444.1|	Chitin synthase 1 [Oxytricha trifallax]	--	Cell wall/membrane/envelope biogenesis	Molecular Function: transferase activity (GO:0016740);;	molecular function: catalytic activity (GO:0003824);; biological process: metabolic process (GO:0008152)	--	--
c48777.graph_c0	1.44152e-15	-2.13178	down	0.0104411	-0.634508	normal	5.70904e-08	1.50093	up	gi|403355152|gb|EJY77145.1|	putative 1,4-alpha-glucan branching enzyme from glycoside hydrolase family GH13 [Oxytricha trifallax]	1,4-alpha-glucan-branching enzyme GN=glgB OS=Dictyostelium discoideum (Slime mold) PE=3 SV=1	Carbohydrate transport and metabolism	Molecular Function: transferase activity (GO:0016740);;	molecular function: catalytic activity (GO:0003824);; biological process: metabolic process (GO:0008152)	K00700|0|mcf:101865907|uncharacterized LOC101865907; K00700 1,4-alpha-glucan branching enzyme [EC:2.4.1.18] (A)	Starch and sucrose metabolism (ko00500)
c48909.graph_c0	0.376199	-0.348166	normal	7.18745e-07	1.15177	up	2.44973e-08	1.50285	up	gi|678332230|emb|CDW78203.1|	pyrophosphate-dependent phosphofructokinase [Stylonychia lemnae]	Pyrophosphate--fructose 6-phosphate 1-phosphotransferase {ECO:0000255|HAMAP-Rule:MF_03185} GN=EHI_000730 OS=Entamoeba histolytica PE=1 SV=1	Carbohydrate transport and metabolism	Molecular Function: transferase activity (GO:0016740);;	molecular function: catalytic activity (GO:0003824);; biological process: metabolic process (GO:0008152)	--	--
c20015.graph_c0	0.873331	0.0771647	normal	2.95393e-05	-1.27304	down	4.09752e-05	-1.346	down	gi|403367101|gb|EJY83359.1|	Aminomethyltransferase [Oxytricha trifallax]	Aminomethyltransferase, mitochondrial (Precursor) GN=gcvT OS=Dictyostelium discoideum (Slime mold) PE=3 SV=1	Amino acid transport and metabolism	Molecular Function: transferase activity (GO:0016740);;	molecular function: catalytic activity (GO:0003824);; biological process: metabolic process (GO:0008152)	K00605|1.37916e-106|nve:NEMVE_v1g137645|hypothetical protein; K00605 aminomethyltransferase [EC:2.1.2.10] (A)	Glycine, serine and threonine metabolism (ko00260);; One carbon pool by folate (ko00670);; Carbon metabolism (ko01200)
c20054.graph_c1	0.0103247	0.760119	normal	1.18176e-08	-1.66821	down	1.13317e-15	-2.42535	down	gi|313232463|emb|CBY24131.1|	unnamed protein product [Oikopleura dioica]	Probable ornithine aminotransferase, mitochondrial (Precursor) GN=C16A3.10 OS=Caenorhabditis elegans PE=3 SV=3	Amino acid transport and metabolism	Molecular Function: transferase activity (GO:0016740);;	molecular function: catalytic activity (GO:0003824);; biological process: metabolic process (GO:0008152)	K00819|7.51741e-68|xma:102219617|ornithine aminotransferase, mitochondrial-like; K00819 ornithine--oxo-acid transaminase [EC:2.6.1.13] (A)	Arginine and proline metabolism (ko00330)
c25497.graph_c0	0.399394	0.670101	normal	0.00792427	1.195	up	0.428742	0.533621	normal	gi|66806533|ref|XP_636989.1|	ornithine-oxo-acid transaminase [Dictyostelium discoideum AX4]	Probable ornithine aminotransferase GN=oatA OS=Dictyostelium discoideum (Slime mold) PE=3 SV=1	Amino acid transport and metabolism	Molecular Function: transferase activity (GO:0016740);;	molecular function: catalytic activity (GO:0003824);; biological process: metabolic process (GO:0008152)	K00819|3.61513e-152|dmo:Dmoj_GI13506|GI13506 gene product from transcript GI13506-RA; K00819 ornithine--oxo-acid transaminase [EC:2.6.1.13] (A)	Arginine and proline metabolism (ko00330)
c52284.graph_c0	0.644987	-0.293105	normal	2.22948e-09	-1.97882	down	0.000288795	-1.67672	down	gi|25144271|ref|NP_741194.1|	Protein C16A3.10, isoform a [Caenorhabditis elegans]	Probable ornithine aminotransferase, mitochondrial (Precursor) GN=C16A3.10 OS=Caenorhabditis elegans PE=3 SV=3	Amino acid transport and metabolism	Molecular Function: transferase activity (GO:0016740);;	molecular function: catalytic activity (GO:0003824);; biological process: metabolic process (GO:0008152)	K00819|1.54834e-127|cbr:CBG09115|Hypothetical protein CBG09115; K00819 ornithine--oxo-acid transaminase [EC:2.6.1.13] (A)	Arginine and proline metabolism (ko00330)
c19457.graph_c1	7.11669e-07	-1.48972	down	3.15022e-13	-1.80522	down	0.509964	-0.311035	normal	gi|145535882|ref|XP_001453674.1|	hypothetical protein [Paramecium tetraurelia strain d4-2]	Probable serine/threonine-protein kinase DDB_G0277449 GN=DDB_G0277449 OS=Dictyostelium discoideum (Slime mold) PE=3 SV=1	General function prediction only	Molecular Function: transferase activity (GO:0016740);;	molecular function: catalytic activity (GO:0003824);; biological process: metabolic process (GO:0008152)	K07376|5.11775e-39|xtr:100498055|cGMP-dependent protein kinase 2-like; K07376 protein kinase, cGMP-dependent [EC:2.7.11.12] (A)	Gap junction (ko04540)
c21678.graph_c0	0.54075	0.22588	normal	0.000285037	-0.824082	normal	3.60923e-05	-1.04846	down	gi|678334677|emb|CDW76931.1|	tetratricopeptide repeat protein [Stylonychia lemnae]	--	--	Molecular Function: transferase activity (GO:0016740);;	molecular function: catalytic activity (GO:0003824);; biological process: metabolic process (GO:0008152)	--	--
c25369.graph_c0	0.0154202	1.00926	normal	0.00153833	1.24453	up	0.633617	0.23461	normal	gi|678343504|emb|CDW72404.1|	ubiquitin family protein [Stylonychia lemnae]	--	Posttranslational modification, protein turnover, chaperones	Molecular Function: transferase activity (GO:0016740);;	molecular function: catalytic activity (GO:0003824);; biological process: metabolic process (GO:0008152)	--	--
c26989.graph_c0	0.241045	-0.39809	normal	0.0135889	0.636916	normal	0.000477144	1.04058	up	gi|403336181|gb|EJY67279.1|	Ethanolaminephosphotransferase [Oxytricha trifallax]	Uncharacterized CDP-alcohol phosphatidyltransferase class-I family protein 2 GN=captB OS=Dictyostelium discoideum (Slime mold) PE=3 SV=1	Lipid transport and metabolism	Molecular Function: transferase activity (GO:0016740);;	molecular function: catalytic activity (GO:0003824);; biological process: metabolic process (GO:0008152)	K13644|1.43725e-37|xtr:549188|cept1, chpt1; choline/ethanolamine phosphotransferase 1 (EC:2.7.8.2 2.7.8.1); K13644 choline/ethanolamine phosphotransferase [EC:2.7.8.1 2.7.8.2] (A)	Glycerophospholipid metabolism (ko00564);; Ether lipid metabolism (ko00565)
c27454.graph_c0	--	--	--	0.00609433	1.27595	up	0.0639022	1.28548	normal	gi|343475990|emb|CCD12774.1|	unnamed protein product [Trypanosoma congolense IL3000]	Serine/threonine kinase SAD-1 {ECO:0000312|EMBL:AAG50270.1} OS=Caenorhabditis elegans PE=1 SV=2	Signal transduction mechanisms	Molecular Function: transferase activity (GO:0016740);;	molecular function: catalytic activity (GO:0003824);; biological process: metabolic process (GO:0008152)	K08799|3.70209e-45|rno:362510|Melk; maternal embryonic leucine zipper kinase (EC:2.7.11.1); K08799 maternal embryonic leucine zipper kinase [EC:2.7.11.1] (A)	--
c27673.graph_c0	0.420165	-0.336973	normal	0.00165018	0.780896	normal	0.000156122	1.1202	up	gi|678307102|emb|CDW91101.1|	phosphatidylinositol 3-kinase [Stylonychia lemnae]	Phosphatidylinositol 3-kinase VPS34-like GN=pikE OS=Dictyostelium discoideum (Slime mold) PE=3 SV=2	--	Molecular Function: transferase activity (GO:0016740);;	molecular function: catalytic activity (GO:0003824);; biological process: metabolic process (GO:0008152)	K00914|2.31834e-91|lcm:102353717|PIK3C3; phosphatidylinositol 3-kinase, catalytic subunit type 3; K00914 phosphatidylinositol 3-kinase [EC:2.7.1.137] (A)	Inositol phosphate metabolism (ko00562);; Phosphatidylinositol signaling system (ko04070);; Regulation of autophagy (ko04140);; Phagosome (ko04145)
c27851.graph_c0	0.010152	-0.828383	normal	0.459892	0.197548	normal	0.00081807	1.02782	up	gi|123473084|ref|XP_001319732.1|	CAMK family protein kinase [Trichomonas vaginalis G3]	G protein-coupled receptor kinase 2 GN=grk-2 OS=Caenorhabditis elegans PE=3 SV=2	Cell cycle control, cell division, chromosome partitioning	Molecular Function: transferase activity (GO:0016740);;	molecular function: catalytic activity (GO:0003824);; biological process: metabolic process (GO:0008152)	K11481|1.2227e-11|tad:TRIADDRAFT_30577|hypothetical protein; K11481 aurora kinase A [EC:2.7.11.1] (A)	--
c33109.graph_c0	0.0166184	1.42398	normal	7.89878e-21	3.09623	up	4.66499e-05	1.67699	up	gi|678320605|emb|CDW84158.1|	UNKNOWN [Stylonychia lemnae]	Serine/threonine-protein kinase unc-51 GN=unc-51 OS=Caenorhabditis elegans PE=1 SV=1	--	Molecular Function: transferase activity (GO:0016740);;	molecular function: catalytic activity (GO:0003824);; biological process: metabolic process (GO:0008152)	K08269|1.37048e-36|phu:Phum_PHUM233660|serine/threonine-protein kinase ULK2, putative (EC:2.7.11.1); K08269 serine/threonine-protein kinase ULK/ATG1 [EC:2.7.11.1] (A)	Regulation of autophagy (ko04140);; mTOR signaling pathway (ko04150)
c33249.graph_c0	0.0822671	0.619603	normal	6.32277e-05	1.04635	up	0.25889	0.426391	normal	gi|403356724|gb|EJY77963.1|	Protein kinase domain containing protein [Oxytricha trifallax]	Calcium-dependent protein kinase 2 GN=CPK2 OS=Plasmodium falciparum (isolate 3D7) PE=2 SV=3	--	Molecular Function: transferase activity (GO:0016740);;	molecular function: catalytic activity (GO:0003824);; biological process: metabolic process (GO:0008152)	K08794|1.9621e-37|tsp:Tsp_03226|calcium/calmodulin-dependent protein kinase type 1; K08794 calcium/calmodulin-dependent protein kinase I [EC:2.7.11.17] (A)	--
c35349.graph_c0	0.901642	-0.0898755	normal	0.000325125	-1.18798	down	0.028899	-1.08756	normal	gi|678344967|emb|CDW71669.1|	protein kinase domain containing protein [Stylonychia lemnae]	--	Cell cycle control, cell division, chromosome partitioning	Molecular Function: transferase activity (GO:0016740);;	molecular function: catalytic activity (GO:0003824);; biological process: metabolic process (GO:0008152)	K08807|2.80697e-06|pbi:103056707|serine/threonine-protein kinase pim-3-like; K08807 proto-oncogene serine/threonine-protein kinase Pim-3 [EC:2.7.11.1] (A)	--
c36358.graph_c0	0.0133654	-0.830103	normal	0.365352	0.258857	normal	0.000248341	1.09565	up	gi|145521588|ref|XP_001446649.1|	hypothetical protein [Paramecium tetraurelia strain d4-2]	Probable serine/threonine-protein kinase MARK-A GN=mrkA OS=Dictyostelium discoideum (Slime mold) PE=3 SV=1	Cell cycle control, cell division, chromosome partitioning	Molecular Function: transferase activity (GO:0016740);;	molecular function: catalytic activity (GO:0003824);; biological process: metabolic process (GO:0008152)	K08811|1.10069e-19|hgl:101717657|Tssk3; testis-specific serine kinase 3; K08811 testis-specific serine kinase [EC:2.7.11.1] (A)	--
c36977.graph_c0	0.00266919	-1.02893	down	1.92644e-12	-2.42412	down	0.00131422	-1.38632	down	gi|123389204|ref|XP_001299686.1|	CK1 family protein kinase [Trichomonas vaginalis G3]	Probable serine/threonine-protein kinase DDB_G0292354 GN=DDB_G0292354 OS=Dictyostelium discoideum (Slime mold) PE=3 SV=1	Signal transduction mechanisms	Molecular Function: transferase activity (GO:0016740);;	molecular function: catalytic activity (GO:0003824);; biological process: metabolic process (GO:0008152)	--	--
c38232.graph_c0	0.00225111	0.911958	normal	1.13678e-09	1.64803	up	0.0202609	0.739033	normal	gi|403343311|gb|EJY70981.1|	Protein kinase domain containing protein [Oxytricha trifallax]	Serine/threonine-protein kinase par-1 {ECO:0000250|UniProtKB:Q9TW45, ECO:0000312|EMBL:CAP25402.1} GN=par-1 OS=Caenorhabditis briggsae PE=3 SV=1	--	Molecular Function: transferase activity (GO:0016740);;	molecular function: catalytic activity (GO:0003824);; biological process: metabolic process (GO:0008152)	K08269|6.56322e-28|aqu:100640446|serine/threonine-protein kinase ULK2-like; K08269 serine/threonine-protein kinase ULK/ATG1 [EC:2.7.11.1] (A)	Regulation of autophagy (ko04140);; mTOR signaling pathway (ko04150)
c38674.graph_c0	0.712698	0.275466	normal	4.63244e-09	2.09215	up	5.85729e-05	1.82405	up	gi|470526454|ref|XP_004356761.1|	PB1 domain containing protein [Acanthamoeba castellanii str. Neff]	--	General function prediction only	Molecular Function: transferase activity (GO:0016740);;	molecular function: catalytic activity (GO:0003824);; biological process: metabolic process (GO:0008152)	K17987|5.30176e-10|spu:586642|next to BRCA1 gene 1 protein-like; K17987 next to BRCA1 gene 1 protein (A)	--
c38855.graph_c0	7.76358e-05	-1.10065	down	5.68581e-08	-1.18035	down	0.847464	-0.0755466	normal	gi|403336811|gb|EJY67601.1|	Protein kinase domain containing protein [Oxytricha trifallax]	Casein kinase I OS=Eimeria tenella (Coccidian parasite) PE=2 SV=1	Signal transduction mechanisms	Molecular Function: transferase activity (GO:0016740);;	molecular function: catalytic activity (GO:0003824);; biological process: metabolic process (GO:0008152)	K08957|3.80969e-30|chx:102183940|casein kinase I isoform alpha-like; K08957 casein kinase 1, alpha [EC:2.7.11.1] (A)	Wnt signaling pathway (ko04310);; Hedgehog signaling pathway (ko04340)
c39180.graph_c0	0.187434	1.07152	normal	0.00285108	1.77819	up	0.213783	0.708584	normal	gi|678320605|emb|CDW84158.1|	UNKNOWN [Stylonychia lemnae]	Serine/threonine-protein kinase atg1 {ECO:0000250|UniProtKB:P53104} GN=atg1 OS=Dictyostelium discoideum (Slime mold) PE=3 SV=1	--	Molecular Function: transferase activity (GO:0016740);;	molecular function: catalytic activity (GO:0003824);; biological process: metabolic process (GO:0008152)	K08269|1.94941e-33|bfo:BRAFLDRAFT_110776|hypothetical protein; K08269 serine/threonine-protein kinase ULK/ATG1 [EC:2.7.11.1] (A)	Regulation of autophagy (ko04140);; mTOR signaling pathway (ko04150)
c40515.graph_c0	0.0641082	0.731067	normal	1.32021e-12	1.85158	up	0.000562056	1.12231	up	gi|403331285|gb|EJY64581.1|	tubulin-tyrosine ligase family protein, putative [Oxytricha trifallax]	Tubulin glycylase 3D GN=TTLL3D OS=Tetrahymena thermophila (strain SB210) PE=3 SV=1	Posttranslational modification, protein turnover, chaperones	Molecular Function: transferase activity (GO:0016740);;	molecular function: catalytic activity (GO:0003824);; biological process: metabolic process (GO:0008152)	K06047|1.62305e-33|bfo:BRAFLDRAFT_65827|hypothetical protein; K06047 tubulin---tyrosine ligase [EC:6.3.2.25] (A)	--
c41832.graph_c0	0.817026	-0.113956	normal	3.54723e-11	1.62152	up	2.42051e-10	1.73898	up	gi|403365613|gb|EJY82595.1|	hypothetical protein OXYTRI_19792 [Oxytricha trifallax]	Methyltransferase-like protein 13 GN=GA15401 OS=Drosophila pseudoobscura pseudoobscura (Fruit fly) PE=3 SV=1	Amino acid transport and metabolism	Molecular Function: transferase activity (GO:0016740);;	molecular function: catalytic activity (GO:0003824);; biological process: metabolic process (GO:0008152)	--	--
c43297.graph_c1	0.0234299	0.923987	normal	0.000306053	1.34814	up	0.3569	0.431798	normal	gi|678327829|emb|CDW80468.1|	phosphatidylinositol-4-phosphate 5-kinase family protein [Stylonychia lemnae]	--	Intracellular trafficking, secretion, and vesicular transport	Molecular Function: transferase activity (GO:0016740);;	molecular function: catalytic activity (GO:0003824);; biological process: metabolic process (GO:0008152)	--	--
c44213.graph_c0	2.28263e-09	1.72569	up	3.82956e-06	1.36888	up	0.306818	-0.351042	normal	gi|678332056|emb|CDW78288.1|	zinc-binding dehydrogenase family protein [Stylonychia lemnae]	Probable quinone oxidoreductase OS=Leishmania amazonensis PE=3 SV=1	--	Molecular Function: transferase activity (GO:0016740);;	molecular function: catalytic activity (GO:0003824);; biological process: metabolic process (GO:0008152)	--	--
c46056.graph_c0	0.00173678	-1.13106	down	0.000240909	-1.0587	down	0.899199	0.0816234	normal	gi|678330651|emb|CDW79021.1|	morn repeat protein [Stylonychia lemnae]	--	General function prediction only	Molecular Function: transferase activity (GO:0016740);;	molecular function: catalytic activity (GO:0003824);; biological process: metabolic process (GO:0008152)	--	--
c47916.graph_c0	0.144465	0.871027	normal	7.97508e-14	2.24581	up	0.00169501	1.37594	up	gi|260806851|ref|XP_002598297.1|	hypothetical protein BRAFLDRAFT_204870 [Branchiostoma floridae]	Probable serine/threonine-protein kinase nek2 GN=nek2 OS=Dictyostelium discoideum (Slime mold) PE=1 SV=1	General function prediction only	Molecular Function: transferase activity (GO:0016740);;	molecular function: catalytic activity (GO:0003824);; biological process: metabolic process (GO:0008152)	K08857|1.71893e-30|bfo:BRAFLDRAFT_204870|hypothetical protein; K08857 NIMA (never in mitosis gene a)-related kinase [EC:2.7.11.1] (A)	--
c48312.graph_c0	5.67867e-09	1.60465	up	3.03731e-34	3.03912	up	7.01362e-09	1.43813	up	gi|678344675|emb|CDW71822.1|	phage head-tail family partial [Stylonychia lemnae]	--	--	Molecular Function: transferase activity (GO:0016740);;	molecular function: catalytic activity (GO:0003824);; biological process: metabolic process (GO:0008152)	--	--
c49470.graph_c0	0.00814352	1.0621	up	0.0122442	0.902545	normal	0.742767	-0.157341	normal	gi|678309128|emb|CDW90051.1|	protein kinase domain containing protein [Stylonychia lemnae]	Casein kinase I OS=Toxoplasma gondii PE=2 SV=1	Signal transduction mechanisms	Molecular Function: transferase activity (GO:0016740);;	molecular function: catalytic activity (GO:0003824);; biological process: metabolic process (GO:0008152)	K08957|3.05917e-31|dse:Dsec_GM17114|GM17114 gene product from transcript GM17114-RA; K08957 casein kinase 1, alpha [EC:2.7.11.1] (A)	Wnt signaling pathway (ko04310);; Hedgehog signaling pathway (ko04340)
c49907.graph_c0	0.482733	-0.3313	normal	0.000301686	-1.67368	down	0.0161279	-1.34244	normal	gi|403373406|gb|EJY86623.1|	Protein kinase domain containing protein [Oxytricha trifallax]	Myosin light chain kinase A GN=mlkA OS=Dictyostelium discoideum (Slime mold) PE=1 SV=2	Cell cycle control, cell division, chromosome partitioning	Molecular Function: transferase activity (GO:0016740);;	molecular function: catalytic activity (GO:0003824);; biological process: metabolic process (GO:0008152)	K17530|2.52462e-32|spu:578013|uncharacterized LOC578013; K17530 doublecortin-like kinase 3 [EC:2.7.11.1] (A)	--
c50656.graph_c0	1.19892e-06	1.26273	up	2.63589e-26	2.41076	up	1.38377e-06	1.1526	up	gi|403343311|gb|EJY70981.1|	Protein kinase domain containing protein [Oxytricha trifallax]	Probable serine/threonine-protein kinase tsuA GN=tsuA OS=Dictyostelium discoideum (Slime mold) PE=1 SV=1	--	Molecular Function: transferase activity (GO:0016740);;	molecular function: catalytic activity (GO:0003824);; biological process: metabolic process (GO:0008152)	K08269|3.21082e-30|fab:101820423|ULK3; unc-51 like kinase 3; K08269 serine/threonine-protein kinase ULK/ATG1 [EC:2.7.11.1] (A)	Regulation of autophagy (ko04140);; mTOR signaling pathway (ko04150)
c51194.graph_c0	2.49884e-05	-1.36559	down	0.00025133	-1.10877	down	0.60041	0.261663	normal	gi|123474475|ref|XP_001320420.1|	CK1 family protein kinase [Trichomonas vaginalis G3]	Casein kinase I isoform alpha GN=kin-19 OS=Caenorhabditis elegans PE=3 SV=1	Signal transduction mechanisms	Molecular Function: transferase activity (GO:0016740);;	molecular function: catalytic activity (GO:0003824);; biological process: metabolic process (GO:0008152)	K08957|1.7912e-08|dgr:Dgri_GH17562|GH17562 gene product from transcript GH17562-RA; K08957 casein kinase 1, alpha [EC:2.7.11.1] (A)	Wnt signaling pathway (ko04310);; Hedgehog signaling pathway (ko04340)
c51216.graph_c0	0.00923851	1.033	up	2.10762e-11	2.10571	up	0.000726095	1.07411	up	gi|403336874|gb|EJY67635.1|	hypothetical protein OXYTRI_11855 [Oxytricha trifallax]	--	--	Molecular Function: transferase activity (GO:0016740);;	molecular function: catalytic activity (GO:0003824);; biological process: metabolic process (GO:0008152)	--	--
c51781.graph_c1	0.121208	0.546081	normal	0.0215287	-0.713964	normal	0.000112881	-1.26109	down	gi|678337366|emb|CDW75516.1|	wd repeat-containing protein 52 [Stylonychia lemnae]	77 kDa echinoderm microtubule-associated protein GN=EMAP OS=Strongylocentrotus purpuratus (Purple sea urchin) PE=2 SV=1	Function unknown	Molecular Function: transferase activity (GO:0016740);;	molecular function: catalytic activity (GO:0003824);; biological process: metabolic process (GO:0008152)	--	--
c51880.graph_c1	0.156444	0.701659	normal	0.00011736	-1.45677	down	6.03536e-10	-2.15926	down	gi|403371295|gb|EJY85526.1|	hypothetical protein OXYTRI_16611 [Oxytricha trifallax]	Inositol 1,4,5-trisphosphate receptor itr-1 {ECO:0000303|PubMed:10499793} OS=Caenorhabditis elegans PE=1 SV=1	Signal transduction mechanisms	Molecular Function: transferase activity (GO:0016740);;	molecular function: catalytic activity (GO:0003824);; biological process: metabolic process (GO:0008152)	K04958|4.44169e-13|nve:NEMVE_v1g244707|hypothetical protein; K04958 inositol 1,4,5-triphosphate receptor type 1 (A)	Phosphatidylinositol signaling system (ko04070)
c52836.graph_c0	0.580339	0.202637	normal	4.69006e-06	1.1252	up	0.00149181	0.926931	normal	gi|403341789|gb|EJY70209.1|	Phosphatidylinositol-4-phosphate 5-Kinase family protein [Oxytricha trifallax]	--	Intracellular trafficking, secretion, and vesicular transport	Molecular Function: transferase activity (GO:0016740);;	molecular function: catalytic activity (GO:0003824);; biological process: metabolic process (GO:0008152)	--	--
c52840.graph_c0	0.76861	0.185126	normal	4.05952e-09	-1.44795	down	0.000121461	-1.6264	down	gi|403332546|gb|EJY65300.1|	Palmitoyl-protein thioesterase 1 [Oxytricha trifallax]	Palmitoyl-protein thioesterase 1 (Precursor) GN=ppt-1 OS=Caenorhabditis elegans PE=2 SV=2	--	Molecular Function: transferase activity (GO:0016740);;	molecular function: catalytic activity (GO:0003824);; biological process: metabolic process (GO:0008152)	K01074|5.07042e-42|api:100164869|palmitoyl-protein thioesterase 1; K01074 palmitoyl-protein thioesterase [EC:3.1.2.22] (A)	Fatty acid elongation (ko00062);; Fatty acid metabolism (ko01212);; Lysosome (ko04142)
c53110.graph_c0	1.96955e-05	-1.71987	down	8.24479e-25	-2.84757	down	0.062831	-1.12303	normal	gi|585673646|ref|XP_006818449.1|	PREDICTED: serine/threonine-protein kinase MARK1-like [Saccoglossus kowalevskii]	Serine/threonine kinase SAD-1 {ECO:0000312|EMBL:AAG50270.1} OS=Caenorhabditis elegans PE=1 SV=2	Cell cycle control, cell division, chromosome partitioning	Molecular Function: transferase activity (GO:0016740);;	molecular function: catalytic activity (GO:0003824);; biological process: metabolic process (GO:0008152)	K08811|2.62865e-30|lgi:LOTGIDRAFT_65840|hypothetical protein; K08811 testis-specific serine kinase [EC:2.7.11.1] (A)	--
c53436.graph_c0	0.281166	-0.463409	normal	2.39153e-15	-2.06942	down	1.57916e-08	-1.6031	down	gi|403356790|gb|EJY77999.1|	hypothetical protein OXYTRI_00358 [Oxytricha trifallax]	Glucosamine 6-phosphate N-acetyltransferase 1 GN=gna1 OS=Dictyostelium discoideum (Slime mold) PE=3 SV=1	Cell wall/membrane/envelope biogenesis	Molecular Function: transferase activity (GO:0016740);;	molecular function: catalytic activity (GO:0003824);; biological process: metabolic process (GO:0008152)	K00621|8.66455e-25|isc:IscW_ISCW009614|acetyltransferase, putative (EC:2.3.1.4); K00621 glucosamine-phosphate N-acetyltransferase [EC:2.3.1.4] (A)	Amino sugar and nucleotide sugar metabolism (ko00520)
c55264.graph_c0	0.0150128	1.02245	normal	0.945523	-0.0378465	normal	0.00453945	-1.05305	down	gi|678324096|emb|CDW82358.1|	UNKNOWN [Stylonychia lemnae]	--	--	Molecular Function: transferase activity (GO:0016740);;	molecular function: catalytic activity (GO:0003824);; biological process: metabolic process (GO:0008152)	--	--
c55517.graph_c0	0.849813	-0.0802805	normal	4.23318e-09	1.21847	up	4.91146e-08	1.30276	up	gi|403366754|gb|EJY83182.1|	Protein kinase domain containing protein [Oxytricha trifallax]	Aurora kinase GN=aurK OS=Dictyostelium discoideum (Slime mold) PE=1 SV=1	Signal transduction mechanisms	Molecular Function: transferase activity (GO:0016740);;	molecular function: catalytic activity (GO:0003824);; biological process: metabolic process (GO:0008152)	K08811|5.67318e-29|lgi:LOTGIDRAFT_177465|hypothetical protein; K08811 testis-specific serine kinase [EC:2.7.11.1] (A)	--
c52186.graph_c0	0.068184	0.808393	normal	0.176639	-0.502586	normal	0.000115558	-1.30486	down	gi|198437286|ref|XP_002131023.1|	PREDICTED: RING-box protein 1 [Ciona intestinalis]	RING-box protein 1 GN=rbx1 OS=Dictyostelium discoideum (Slime mold) PE=3 SV=1	Posttranslational modification, protein turnover, chaperones	Molecular Function: transcription cofactor activity (GO:0003712);; Molecular Function: histone acetyltransferase activity (GO:0004402);; Cellular Component: nucleus (GO:0005634);; Biological Process: regulation of transcription, DNA-templated (GO:0006355);; Molecular Function: zinc ion binding (GO:0008270);; Biological Process: histone acetylation (GO:0016573);; Molecular Function: ligase activit…	molecular function: protein binding transcription factor activity (GO:0000988);; biological process: biological regulation (GO:0065007);; molecular function: catalytic activity (GO:0003824);; biological process: metabolic process (GO:0008152);; biological process: cellular process (GO:0009987);; biological process: single-organism process (GO:0044699);; biological process: cellular component orga…	K03868|3.02352e-53|cin:100182516|RING-box protein 1; K03868 RING-box protein 1 (A)	Nucleotide excision repair (ko03420);; Ubiquitin mediated proteolysis (ko04120);; Protein processing in endoplasmic reticulum (ko04141);; Wnt signaling pathway (ko04310);; TGF-beta signaling pathway (ko04350)
c35986.graph_c0	--	--	--	3.49241e-10	3.21683	up	0.136346	1.01412	normal	gi|470517204|ref|XP_004353177.1|	alanineglyoxylate aminotransferase [Acanthamoeba castellanii str. Neff]	Alanine--glyoxylate aminotransferase 2-like GN=CG8745 OS=Drosophila melanogaster (Fruit fly) PE=2 SV=2	Amino acid transport and metabolism	Molecular Function: transaminase activity (GO:0008483);;	molecular function: catalytic activity (GO:0003824);; biological process: metabolic process (GO:0008152)	K00827|9.17587e-94|lcm:102356225|AGXT2; alanine--glyoxylate aminotransferase 2; K00827 alanine-glyoxylate transaminase / (R)-3-amino-2-methylpropionate-pyruvate transaminase [EC:2.6.1.44 2.6.1.40] (A)	Alanine, aspartate and glutamate metabolism (ko00250);; Glycine, serine and threonine metabolism (ko00260)
c39442.graph_c0	0.937205	0.0496124	normal	3.40791e-05	1.34177	up	0.000337211	1.29717	up	gi|212373999|emb|CAP19646.1|	thymidine kinase [Suberites domuncula]	Thymidine kinase 1 OS=Dictyostelium discoideum (Slime mold) PE=1 SV=1	Nucleotide transport and metabolism	Molecular Function: thymidine kinase activity (GO:0004797);; Molecular Function: ATP binding (GO:0005524);; Biological Process: DNA replication (GO:0006260);; Biological Process: phosphorylation (GO:0016310);;	molecular function: catalytic activity (GO:0003824);; biological process: metabolic process (GO:0008152);; biological process: cellular process (GO:0009987);; biological process: single-organism process (GO:0044699);; molecular function: binding (GO:0005488)	K00857|5.22318e-71|pbi:103065078|TK1; thymidine kinase 1, soluble; K00857 thymidine kinase [EC:2.7.1.21] (A)	Pyrimidine metabolism (ko00240);; Drug metabolism - other enzymes (ko00983)
c54147.graph_c0	--	--	--	0.00952986	1.29763	up	0.0582286	1.32744	normal	gi|735855585|dbj|GAM21853.1|	hypothetical protein SAMD00019534_050280, partial [Acytostelium subglobosum LB1]	Proteasome subunit beta type-6 (Precursor) GN=psmB6 OS=Dictyostelium discoideum (Slime mold) PE=1 SV=1	Posttranslational modification, protein turnover, chaperones	Molecular Function: threonine-type endopeptidase activity (GO:0004298);; Cellular Component: nucleus (GO:0005634);; Cellular Component: cytoplasm (GO:0005737);; Cellular Component: proteasome core complex (GO:0005839);; Biological Process: proteolysis involved in cellular protein catabolic process (GO:0051603);;	molecular function: catalytic activity (GO:0003824);; biological process: metabolic process (GO:0008152);; cellular component: cell (GO:0005623);; cellular component: organelle (GO:0043226);; cellular component: cell part (GO:0044464);; cellular component: macromolecular complex (GO:0032991);; biological process: cellular process (GO:0009987)	K02738|6.38488e-102|spu:575236|proteasome subunit beta type-6-like; K02738 20S proteasome subunit beta 1 [EC:3.4.25.1] (A)	Proteasome (ko03050)
c46643.graph_c0	0.382879	-0.289539	normal	4.08139e-16	-1.8065	down	1.22771e-09	-1.51209	down	gi|403360445|gb|EJY79900.1|	hypothetical protein OXYTRI_22821 [Oxytricha trifallax]	Succinate dehydrogenase [ubiquinone] flavoprotein subunit, mitochondrial (Precursor) GN=SdhA OS=Drosophila melanogaster (Fruit fly) PE=2 SV=3	Energy production and conversion	Molecular Function: succinate-CoA ligase (GDP-forming) activity (GO:0004776);; Cellular Component: mitochondrial respiratory chain complex II (GO:0005749);; Biological Process: tricarboxylic acid cycle (GO:0006099);; Molecular Function: succinate dehydrogenase (ubiquinone) activity (GO:0008177);; Biological Process: electron transport chain (GO:0022900);; Molecular Function: flavin adenine dinucl…	molecular function: catalytic activity (GO:0003824);; biological process: metabolic process (GO:0008152);; cellular component: cell (GO:0005623);; cellular component: membrane (GO:0016020);; cellular component: macromolecular complex (GO:0032991);; cellular component: organelle (GO:0043226);; cellular component: organelle part (GO:0044422);; cellular component: membrane part (GO:0044425);; cellul…	K00234|0|cqu:CpipJ_CPIJ006167|succinate dehydrogenase flavoprotein subunit, mitochondrial; K00234 succinate dehydrogenase (ubiquinone) flavoprotein subunit [EC:1.3.5.1] (A)	Citrate cycle (TCA cycle) (ko00020);; Oxidative phosphorylation (ko00190);; Carbon metabolism (ko01200)
c44133.graph_c0	--	--	--	0.00010619	1.9365	up	0.12239	1.14179	normal	gi|66819715|ref|XP_643516.1|	transmembrane protein [Dictyostelium discoideum AX4]	Phospholipid-transporting ATPase tat-1 GN=tat-1 OS=Caenorhabditis elegans PE=3 SV=3	General function prediction only	Molecular Function: substrate-specific transporter activity (GO:0022892);; Molecular Function: ion binding (GO:0043167);; Molecular Function: ATPase activity, coupled to movement of substances (GO:0043492);;	molecular function: transporter activity (GO:0005215);; biological process: localization (GO:0051179);; molecular function: binding (GO:0005488);; molecular function: catalytic activity (GO:0003824);; biological process: metabolic process (GO:0008152);; biological process: cellular process (GO:0009987);; biological process: single-organism process (GO:0044699)	K14802|0|dya:Dyak_GE13364|GE13364 gene product from transcript GE13364-RA; K14802 phospholipid-transporting ATPase [EC:3.6.3.1] (A)	--
c54300.graph_c0	0.110759	0.651794	normal	0.018715	-0.5956	normal	0.000150205	-1.24157	down	gi|332717325|gb|AEE99002.1|	acidic ribosomal protein P0 [Euplotes octocarinatus]	60S acidic ribosomal protein P0 GN=RpLP0 OS=Ceratitis capitata (Mediterranean fruit fly) PE=3 SV=1	Translation, ribosomal structure and biogenesis	Molecular Function: structural constituent of ribosome (GO:0003735);; Cellular Component: ribosome (GO:0005840);; Biological Process: translational elongation (GO:0006414);; Biological Process: ribosome biogenesis (GO:0042254);;	molecular function: structural molecule activity (GO:0005198);; cellular component: cell (GO:0005623);; cellular component: macromolecular complex (GO:0032991);; cellular component: organelle (GO:0043226);; cellular component: cell part (GO:0044464);; biological process: metabolic process (GO:0008152);; biological process: cellular process (GO:0009987);; biological process: cellular component org…	K02941|6.66717e-69|isc:IscW_ISCW007303|60S acidic ribosomal protein P0, putative (EC:4.2.99.18); K02941 large subunit ribosomal protein LP0 (A)	Ribosome (ko03010)
c37306.graph_c0	0.175789	0.755975	normal	0.252587	-0.468705	normal	0.00709888	-1.21515	down	gi|332717323|gb|AEE99001.1|	acidic ribosomal protein P2 [Euplotes octocarinatus]	60S acidic ribosomal protein P2 OS=Euplotes raikovi PE=3 SV=1	Translation, ribosomal structure and biogenesis	Molecular Function: structural constituent of ribosome (GO:0003735);; Cellular Component: ribosome (GO:0005840);; Biological Process: translational elongation (GO:0006414);;	molecular function: structural molecule activity (GO:0005198);; cellular component: cell (GO:0005623);; cellular component: macromolecular complex (GO:0032991);; cellular component: organelle (GO:0043226);; cellular component: cell part (GO:0044464);; biological process: metabolic process (GO:0008152);; biological process: cellular process (GO:0009987)	K02943|1.09253e-15|bmor:692692|RpLP2, Rpp2; ribosomal protein P2; K02943 large subunit ribosomal protein LP2 (A)	Ribosome (ko03010)
c43112.graph_c1	1	0.00442729	normal	0.00354093	1.33968	up	0.00585457	1.33696	up	gi|470393565|ref|XP_004334896.1|	ribosomal protein L6, putative [Acanthamoeba castellanii str. Neff]	60S ribosomal protein L9 GN=RpL9 OS=Spodoptera frugiperda (Fall armyworm) PE=2 SV=1	Translation, ribosomal structure and biogenesis	Molecular Function: structural constituent of ribosome (GO:0003735);; Cellular Component: ribosome (GO:0005840);; Biological Process: translation (GO:0006412);; Molecular Function: rRNA binding (GO:0019843);;	molecular function: structural molecule activity (GO:0005198);; cellular component: cell (GO:0005623);; cellular component: macromolecular complex (GO:0032991);; cellular component: organelle (GO:0043226);; cellular component: cell part (GO:0044464);; biological process: metabolic process (GO:0008152);; biological process: cellular process (GO:0009987);; molecular function: binding (GO:0005488)	K02940|2.82529e-49|ame:551107|RpL9, GB15648; ribosomal protein L9; K02940 large subunit ribosomal protein L9e (A)	Ribosome (ko03010)
c43918.graph_c0	0.225648	0.845775	normal	3.50796e-05	1.51957	up	0.303716	0.684523	normal	gi|61654708|gb|AAX48880.1|	S4 [Suberites domuncula]	40S ribosomal protein S4 GN=RpS4 OS=Lysiphlebus testaceipes (Greenbugs aphid parastoid) PE=2 SV=1	Translation, ribosomal structure and biogenesis	Molecular Function: structural constituent of ribosome (GO:0003735);; Cellular Component: ribosome (GO:0005840);; Biological Process: translation (GO:0006412);; Molecular Function: rRNA binding (GO:0019843);;	molecular function: structural molecule activity (GO:0005198);; cellular component: cell (GO:0005623);; cellular component: macromolecular complex (GO:0032991);; cellular component: organelle (GO:0043226);; cellular component: cell part (GO:0044464);; biological process: metabolic process (GO:0008152);; biological process: cellular process (GO:0009987);; molecular function: binding (GO:0005488)	K02987|7.80817e-119|xma:102233671|40S ribosomal protein S4-like; K02987 small subunit ribosomal protein S4e (A)	Ribosome (ko03010)
c52911.graph_c0	0.121358	1.06504	normal	5.98488e-05	1.52157	up	0.51803	0.467222	normal	gi|260829983|ref|XP_002609941.1|	hypothetical protein BRAFLDRAFT_114927 [Branchiostoma floridae]	40S ribosomal protein S18 GN=RPS18 OS=Branchiostoma belcheri (Amphioxus) PE=2 SV=1	Translation, ribosomal structure and biogenesis	Molecular Function: structural constituent of ribosome (GO:0003735);; Cellular Component: ribosome (GO:0005840);; Biological Process: translation (GO:0006412);; Molecular Function: rRNA binding (GO:0019843);;	molecular function: structural molecule activity (GO:0005198);; cellular component: cell (GO:0005623);; cellular component: macromolecular complex (GO:0032991);; cellular component: organelle (GO:0043226);; cellular component: cell part (GO:0044464);; biological process: metabolic process (GO:0008152);; biological process: cellular process (GO:0009987);; molecular function: binding (GO:0005488)	K02964|5.34692e-62|bfo:BRAFLDRAFT_114927|hypothetical protein; K02964 small subunit ribosomal protein S18e (A)	Ribosome (ko03010)
c53713.graph_c0	0.00235685	0.90295	normal	0.338093	-0.244825	normal	1.38545e-05	-1.1433	down	gi|196002451|ref|XP_002111093.1|	ribosomal protein L44 [Trichoplax adhaerens]	60S ribosomal protein L44 GN=RPL44 OS=Plasmodium falciparum (isolate 3D7) PE=1 SV=3	Translation, ribosomal structure and biogenesis	Molecular Function: structural constituent of ribosome (GO:0003735);; Cellular Component: ribosome (GO:0005840);; Biological Process: translation (GO:0006412);; Biological Process: transport (GO:0006810);; Biological Process: single-organism process (GO:0044699);;	molecular function: structural molecule activity (GO:0005198);; cellular component: cell (GO:0005623);; cellular component: macromolecular complex (GO:0032991);; cellular component: organelle (GO:0043226);; cellular component: cell part (GO:0044464);; biological process: metabolic process (GO:0008152);; biological process: cellular process (GO:0009987);; biological process: localization (GO:00511…	K02929|6.30183e-27|tad:TRIADDRAFT_35694|ribosomal protein L44; K02929 large subunit ribosomal protein L44e (A)	Ribosome (ko03010)
c20872.graph_c0	0.335434	0.695549	normal	0.000444165	1.43962	up	0.199103	0.753213	normal	gi|403348667|gb|EJY73774.1|	DEAD/DEAH box RNA helicase putative [Oxytricha trifallax]	60S ribosomal protein L35a GN=rpl-33 OS=Caenorhabditis elegans PE=1 SV=3	Translation, ribosomal structure and biogenesis	Molecular Function: structural constituent of ribosome (GO:0003735);; Cellular Component: ribosome (GO:0005840);; Biological Process: translation (GO:0006412);;	molecular function: structural molecule activity (GO:0005198);; cellular component: cell (GO:0005623);; cellular component: macromolecular complex (GO:0032991);; cellular component: organelle (GO:0043226);; cellular component: cell part (GO:0044464);; biological process: metabolic process (GO:0008152);; biological process: cellular process (GO:0009987)	K02917|1.1401e-40|ame:409599|RpL35A, GB12441; ribosomal protein L35A; K02917 large subunit ribosomal protein L35Ae (A)	Ribosome (ko03010)
c23612.graph_c0	0.000369654	1.02189	up	0.850534	0.0526942	normal	0.000456594	-0.964451	normal	gi|159145650|gb|ABW90362.1|	putative ribosomal protein L30 [Sipunculus nudus]	60S ribosomal protein L30 GN=RPL30 OS=Branchiostoma belcheri (Amphioxus) PE=3 SV=1	Translation, ribosomal structure and biogenesis	Molecular Function: structural constituent of ribosome (GO:0003735);; Cellular Component: ribosome (GO:0005840);; Biological Process: translation (GO:0006412);;	molecular function: structural molecule activity (GO:0005198);; cellular component: cell (GO:0005623);; cellular component: macromolecular complex (GO:0032991);; cellular component: organelle (GO:0043226);; cellular component: cell part (GO:0044464);; biological process: metabolic process (GO:0008152);; biological process: cellular process (GO:0009987)	K02908|5.93447e-41|hmg:100207455|60S ribosomal protein L30-like; K02908 large subunit ribosomal protein L30e (A)	Ribosome (ko03010)
c30033.graph_c0	0.304286	0.722064	normal	8.87474e-05	1.35435	up	0.286434	0.641761	normal	gi|470525984|ref|XP_004356682.1|	ribosomal protein S15, putative [Acanthamoeba castellanii str. Neff]	40S ribosomal protein S13 GN=RPS13 OS=Wuchereria bancrofti PE=3 SV=2	Translation, ribosomal structure and biogenesis	Molecular Function: structural constituent of ribosome (GO:0003735);; Cellular Component: ribosome (GO:0005840);; Biological Process: translation (GO:0006412);;	molecular function: structural molecule activity (GO:0005198);; cellular component: cell (GO:0005623);; cellular component: macromolecular complex (GO:0032991);; cellular component: organelle (GO:0043226);; cellular component: cell part (GO:0044464);; biological process: metabolic process (GO:0008152);; biological process: cellular process (GO:0009987)	K02953|3.82953e-76|phd:102332080|RPS13; ribosomal protein S13; K02953 small subunit ribosomal protein S13e (A)	Ribosome (ko03010)
c32628.graph_c0	0.2351	0.873968	normal	8.67971e-05	1.63454	up	0.212036	0.770063	normal	gi|167522202|ref|XP_001745439.1|	hypothetical protein [Monosiga brevicollis MX1]	60S ribosomal protein L18 GN=RpL18 OS=Diaphorina citri (Asian citrus psyllid) PE=2 SV=1	Translation, ribosomal structure and biogenesis	Molecular Function: structural constituent of ribosome (GO:0003735);; Cellular Component: ribosome (GO:0005840);; Biological Process: translation (GO:0006412);;	molecular function: structural molecule activity (GO:0005198);; cellular component: cell (GO:0005623);; cellular component: macromolecular complex (GO:0032991);; cellular component: organelle (GO:0043226);; cellular component: cell part (GO:0044464);; biological process: metabolic process (GO:0008152);; biological process: cellular process (GO:0009987)	K02883|1.57443e-79|hro:HELRODRAFT_156470|hypothetical protein; K02883 large subunit ribosomal protein L18e (A)	Ribosome (ko03010)
c32999.graph_c0	0.127082	0.914201	normal	7.66511e-06	1.48901	up	0.355209	0.584954	normal	gi|470459157|ref|XP_004341325.1|	ribosomal protein L3, putative [Acanthamoeba castellanii str. Neff]	60S ribosomal protein L3 GN=RpL3 OS=Drosophila melanogaster (Fruit fly) PE=1 SV=3	Translation, ribosomal structure and biogenesis	Molecular Function: structural constituent of ribosome (GO:0003735);; Cellular Component: ribosome (GO:0005840);; Biological Process: translation (GO:0006412);;	molecular function: structural molecule activity (GO:0005198);; cellular component: cell (GO:0005623);; cellular component: macromolecular complex (GO:0032991);; cellular component: organelle (GO:0043226);; cellular component: cell part (GO:0044464);; biological process: metabolic process (GO:0008152);; biological process: cellular process (GO:0009987)	K02925|0|ocu:100358512|RPL3; ribosomal protein L3; K02925 large subunit ribosomal protein L3e (A)	Ribosome (ko03010)
c33188.graph_c0	0.529051	0.586377	normal	0.00366097	1.28389	up	0.340739	0.7084	normal	gi|675384628|gb|KFM77525.1|	60S ribosomal protein L31, partial [Stegodyphus mimosarum]	60S ribosomal protein L31 GN=rpl31 OS=Dictyostelium discoideum (Slime mold) PE=3 SV=1	Translation, ribosomal structure and biogenesis	Molecular Function: structural constituent of ribosome (GO:0003735);; Cellular Component: ribosome (GO:0005840);; Biological Process: translation (GO:0006412);;	molecular function: structural molecule activity (GO:0005198);; cellular component: cell (GO:0005623);; cellular component: macromolecular complex (GO:0032991);; cellular component: organelle (GO:0043226);; cellular component: cell part (GO:0044464);; biological process: metabolic process (GO:0008152);; biological process: cellular process (GO:0009987)	K02910|1.29995e-45|nve:NEMVE_v1g235042|hypothetical protein; K02910 large subunit ribosomal protein L31e (A)	Ribosome (ko03010)
c34088.graph_c0	--	--	--	3.65766e-05	1.93155	up	0.458204	0.574457	normal	gi|470374500|ref|XP_004333102.1|	ribosomal protein L32, putative [Acanthamoeba castellanii str. Neff]	60S ribosomal protein L32 GN=RpL32 OS=Drosophila acanthoptera (Fruit fly) PE=2 SV=1	Translation, ribosomal structure and biogenesis	Molecular Function: structural constituent of ribosome (GO:0003735);; Cellular Component: ribosome (GO:0005840);; Biological Process: translation (GO:0006412);;	molecular function: structural molecule activity (GO:0005198);; cellular component: cell (GO:0005623);; cellular component: macromolecular complex (GO:0032991);; cellular component: organelle (GO:0043226);; cellular component: cell part (GO:0044464);; biological process: metabolic process (GO:0008152);; biological process: cellular process (GO:0009987)	K02912|4.95037e-51|oaa:100086217|RPL32; ribosomal protein L32; K02912 large subunit ribosomal protein L32e (A)	Ribosome (ko03010)
c34806.graph_c0	0.153365	1.00619	normal	4.42886e-05	1.44549	up	0.550661	0.451075	normal	gi|198435228|ref|XP_002131561.1|	PREDICTED: 60S ribosomal protein L12 [Ciona intestinalis]	60S ribosomal protein L12 GN=rpl-12 OS=Caenorhabditis elegans PE=3 SV=1	Translation, ribosomal structure and biogenesis	Molecular Function: structural constituent of ribosome (GO:0003735);; Cellular Component: ribosome (GO:0005840);; Biological Process: translation (GO:0006412);;	molecular function: structural molecule activity (GO:0005198);; cellular component: cell (GO:0005623);; cellular component: macromolecular complex (GO:0032991);; cellular component: organelle (GO:0043226);; cellular component: cell part (GO:0044464);; biological process: metabolic process (GO:0008152);; biological process: cellular process (GO:0009987)	K02870|1.31543e-82|cin:100184231|60S ribosomal protein L12; K02870 large subunit ribosomal protein L12e (A)	Ribosome (ko03010)
c34923.graph_c0	--	--	--	0.00227529	1.79351	up	0.458957	0.584472	normal	gi|694525039|ref|XP_009492324.1|	40S ribosomal protein [Fonticula alba]	40S ribosomal protein S26 GN=RpS26 OS=Drosophila melanogaster (Fruit fly) PE=1 SV=1	Translation, ribosomal structure and biogenesis	Molecular Function: structural constituent of ribosome (GO:0003735);; Cellular Component: ribosome (GO:0005840);; Biological Process: translation (GO:0006412);;	molecular function: structural molecule activity (GO:0005198);; cellular component: cell (GO:0005623);; cellular component: macromolecular complex (GO:0032991);; cellular component: organelle (GO:0043226);; cellular component: cell part (GO:0044464);; biological process: metabolic process (GO:0008152);; biological process: cellular process (GO:0009987)	K02976|3.13127e-25|ame:726789|RpS26, GB12691; ribosomal protein S26; K02976 small subunit ribosomal protein S26e (A)	Ribosome (ko03010)
c36159.graph_c0	0.28494	0.807513	normal	3.61159e-05	1.40201	up	0.406094	0.604649	normal	gi|501291082|dbj|BAN20296.1|	ribosomal protein L19 [Riptortus pedestris]	60S ribosomal protein L19 GN=RpL19 OS=Drosophila melanogaster (Fruit fly) PE=1 SV=2	Translation, ribosomal structure and biogenesis	Molecular Function: structural constituent of ribosome (GO:0003735);; Cellular Component: ribosome (GO:0005840);; Biological Process: translation (GO:0006412);;	molecular function: structural molecule activity (GO:0005198);; cellular component: cell (GO:0005623);; cellular component: macromolecular complex (GO:0032991);; cellular component: organelle (GO:0043226);; cellular component: cell part (GO:0044464);; biological process: metabolic process (GO:0008152);; biological process: cellular process (GO:0009987)	K02885|1.04804e-72|bmy:Bm1_34025|60S ribosomal protein L19; K02885 large subunit ribosomal protein L19e (A)	Ribosome (ko03010)
c36526.graph_c0	0.311784	0.714656	normal	8.78366e-05	1.38099	up	0.253211	0.675226	normal	gi|470441553|ref|XP_004339426.1|	ribosomal protein L10, putative [Acanthamoeba castellanii str. Neff]	60S ribosomal protein L10 GN=rpl10 OS=Dictyostelium discoideum (Slime mold) PE=1 SV=2	Translation, ribosomal structure and biogenesis	Molecular Function: structural constituent of ribosome (GO:0003735);; Cellular Component: ribosome (GO:0005840);; Biological Process: translation (GO:0006412);;	molecular function: structural molecule activity (GO:0005198);; cellular component: cell (GO:0005623);; cellular component: macromolecular complex (GO:0032991);; cellular component: organelle (GO:0043226);; cellular component: cell part (GO:0044464);; biological process: metabolic process (GO:0008152);; biological process: cellular process (GO:0009987)	K02866|1.32474e-103|cqu:CpipJ_CPIJ018688|60S ribosomal protein L10; K02866 large subunit ribosomal protein L10e (A)	Ribosome (ko03010)
c36999.graph_c0	0.320181	0.376354	normal	0.00181736	-0.769612	normal	2.73203e-05	-1.14027	down	gi|50787664|emb|CAH04404.1|	ribosomal protein S13 [Euplotes vannus]	40S ribosomal protein S13 GN=RPS13 OS=Wuchereria bancrofti PE=3 SV=2	Translation, ribosomal structure and biogenesis	Molecular Function: structural constituent of ribosome (GO:0003735);; Cellular Component: ribosome (GO:0005840);; Biological Process: translation (GO:0006412);;	molecular function: structural molecule activity (GO:0005198);; cellular component: cell (GO:0005623);; cellular component: macromolecular complex (GO:0032991);; cellular component: organelle (GO:0043226);; cellular component: cell part (GO:0044464);; biological process: metabolic process (GO:0008152);; biological process: cellular process (GO:0009987)	K02953|9.49704e-71|hro:HELRODRAFT_62947|hypothetical protein; K02953 small subunit ribosomal protein S13e (A)	Ribosome (ko03010)
c39042.graph_c0	0.041552	1.00636	normal	0.0821417	-0.570987	normal	0.000192915	-1.56945	down	gi|678329963|emb|CDW79386.1|	related to ssf1-nucleolar protein involved in the assembly of the large ribosomal subunit [Stylonychia lemnae]	40S ribosomal protein S14 GN=RPS14 OS=Podocoryne carnea PE=2 SV=1	Translation, ribosomal structure and biogenesis	Molecular Function: structural constituent of ribosome (GO:0003735);; Cellular Component: ribosome (GO:0005840);; Biological Process: translation (GO:0006412);;	molecular function: structural molecule activity (GO:0005198);; cellular component: cell (GO:0005623);; cellular component: macromolecular complex (GO:0032991);; cellular component: organelle (GO:0043226);; cellular component: cell part (GO:0044464);; biological process: metabolic process (GO:0008152);; biological process: cellular process (GO:0009987)	K02955|4.18986e-43|dre:336687|rps14, fa92e08, wu:fa92e08, zgc:73215; ribosomal protein S14; K02955 small subunit ribosomal protein S14e (A)	Ribosome (ko03010)
c39686.graph_c0	--	--	--	0.000612176	1.56152	up	0.0925258	1.07826	normal	gi|470416792|ref|XP_004336922.1|	ribosomal protein L44, putative [Acanthamoeba castellanii str. Neff]	60S ribosomal protein L44 GN=rpl-41 OS=Caenorhabditis elegans PE=3 SV=2	Translation, ribosomal structure and biogenesis	Molecular Function: structural constituent of ribosome (GO:0003735);; Cellular Component: ribosome (GO:0005840);; Biological Process: translation (GO:0006412);;	molecular function: structural molecule activity (GO:0005198);; cellular component: cell (GO:0005623);; cellular component: macromolecular complex (GO:0032991);; cellular component: organelle (GO:0043226);; cellular component: cell part (GO:0044464);; biological process: metabolic process (GO:0008152);; biological process: cellular process (GO:0009987)	K02929|5.52421e-44|hro:HELRODRAFT_157004|hypothetical protein; K02929 large subunit ribosomal protein L44e (A)	Ribosome (ko03010)
c40788.graph_c0	0.197105	0.898089	normal	9.26195e-07	1.54575	up	0.270691	0.654359	normal	gi|470529918|ref|XP_004368153.1|	ribosomal protein S17, putative [Acanthamoeba castellanii str. Neff]	40S ribosomal protein S11 GN=rps11 OS=Dictyostelium discoideum (Slime mold) PE=1 SV=1	Translation, ribosomal structure and biogenesis	Molecular Function: structural constituent of ribosome (GO:0003735);; Cellular Component: ribosome (GO:0005840);; Biological Process: translation (GO:0006412);;	molecular function: structural molecule activity (GO:0005198);; cellular component: cell (GO:0005623);; cellular component: macromolecular complex (GO:0032991);; cellular component: organelle (GO:0043226);; cellular component: cell part (GO:0044464);; biological process: metabolic process (GO:0008152);; biological process: cellular process (GO:0009987)	K02949|2.38165e-69|lcm:102352218|40S ribosomal protein S11-like; K02949 small subunit ribosomal protein S11e (A)	Ribosome (ko03010)
c41288.graph_c0	0.228097	0.873886	normal	0.00010555	1.55527	up	0.244999	0.689621	normal	gi|166240344|ref|XP_637982.2|	S60 ribosomal protein L18a [Dictyostelium discoideum AX4]	60S ribosomal protein L18a GN=rpl18a OS=Dictyostelium discoideum (Slime mold) PE=3 SV=2	Translation, ribosomal structure and biogenesis	Molecular Function: structural constituent of ribosome (GO:0003735);; Cellular Component: ribosome (GO:0005840);; Biological Process: translation (GO:0006412);;	molecular function: structural molecule activity (GO:0005198);; cellular component: cell (GO:0005623);; cellular component: macromolecular complex (GO:0032991);; cellular component: organelle (GO:0043226);; cellular component: cell part (GO:0044464);; biological process: metabolic process (GO:0008152);; biological process: cellular process (GO:0009987)	K02882|8.78638e-69|pbi:103050875|60S ribosomal protein L18a-like; K02882 large subunit ribosomal protein L18Ae (A)	Ribosome (ko03010)
c42071.graph_c0	0.266573	0.790431	normal	7.68337e-05	1.39371	up	0.355451	0.6129	normal	gi|156357144|ref|XP_001624083.1|	predicted protein [Nematostella vectensis]	60S ribosomal protein L15 GN=rpl15-2 OS=Dictyostelium discoideum (Slime mold) PE=1 SV=1	Translation, ribosomal structure and biogenesis	Molecular Function: structural constituent of ribosome (GO:0003735);; Cellular Component: ribosome (GO:0005840);; Biological Process: translation (GO:0006412);;	molecular function: structural molecule activity (GO:0005198);; cellular component: cell (GO:0005623);; cellular component: macromolecular complex (GO:0032991);; cellular component: organelle (GO:0043226);; cellular component: cell part (GO:0044464);; biological process: metabolic process (GO:0008152);; biological process: cellular process (GO:0009987)	K02877|5.16199e-98|nve:NEMVE_v1g194235|hypothetical protein; K02877 large subunit ribosomal protein L15e (A)	Ribosome (ko03010)
c52258.graph_c0	0.46497	0.651274	normal	0.00425822	1.40611	up	0.264539	0.765362	normal	gi|339251312|ref|XP_003373139.1|	40S ribosomal protein S16 [Trichinella spiralis]	40S ribosomal protein S16 GN=rps16 OS=Dictyostelium discoideum (Slime mold) PE=3 SV=1	Translation, ribosomal structure and biogenesis	Molecular Function: structural constituent of ribosome (GO:0003735);; Cellular Component: ribosome (GO:0005840);; Biological Process: translation (GO:0006412);;	molecular function: structural molecule activity (GO:0005198);; cellular component: cell (GO:0005623);; cellular component: macromolecular complex (GO:0032991);; cellular component: organelle (GO:0043226);; cellular component: cell part (GO:0044464);; biological process: metabolic process (GO:0008152);; biological process: cellular process (GO:0009987)	K02960|1.02171e-71|tsp:Tsp_11551|40S ribosomal protein S16; K02960 small subunit ribosomal protein S16e (A)	Ribosome (ko03010)
c52476.graph_c0	0.00596683	0.809372	normal	0.0598544	-0.455309	normal	1.42885e-07	-1.26077	down	gi|471229820|ref|XP_004035748.1|	hypothetical protein IMG5_091110 [Ichthyophthirius multifiliis]	60S ribosomal protein L31 GN=RPL31 OS=Tetrahymena thermophila (strain SB210) PE=1 SV=1	Translation, ribosomal structure and biogenesis	Molecular Function: structural constituent of ribosome (GO:0003735);; Cellular Component: ribosome (GO:0005840);; Biological Process: translation (GO:0006412);;	molecular function: structural molecule activity (GO:0005198);; cellular component: cell (GO:0005623);; cellular component: macromolecular complex (GO:0032991);; cellular component: organelle (GO:0043226);; cellular component: cell part (GO:0044464);; biological process: metabolic process (GO:0008152);; biological process: cellular process (GO:0009987)	K02910|8.87277e-38|tad:TRIADDRAFT_63137|expressed hypothetical protein; K02910 large subunit ribosomal protein L31e (A)	Ribosome (ko03010)
c54436.graph_c0	0.481815	0.525539	normal	0.00343837	1.18056	up	0.284622	0.665474	normal	gi|241093831|ref|XP_002409414.1|	ribosomal protein L11, putative [Ixodes scapularis]	60S ribosomal protein L11 GN=RpL11 OS=Drosophila melanogaster (Fruit fly) PE=1 SV=2	Translation, ribosomal structure and biogenesis	Molecular Function: structural constituent of ribosome (GO:0003735);; Cellular Component: ribosome (GO:0005840);; Biological Process: translation (GO:0006412);;	molecular function: structural molecule activity (GO:0005198);; cellular component: cell (GO:0005623);; cellular component: macromolecular complex (GO:0032991);; cellular component: organelle (GO:0043226);; cellular component: cell part (GO:0044464);; biological process: metabolic process (GO:0008152);; biological process: cellular process (GO:0009987)	K02868|1.13902e-80|dre:415229|rpl11, zgc:86748; ribosomal protein L11; K02868 large subunit ribosomal protein L11e (A)	Ribosome (ko03010)
c54759.graph_c0	0.444676	0.594964	normal	0.00113695	1.29293	up	0.215444	0.705518	normal	gi|470490985|ref|XP_004345840.1|	ribosomal protein S17, putative [Acanthamoeba castellanii str. Neff]	40S ribosomal protein S17 GN=RpS17 OS=Drosophila melanogaster (Fruit fly) PE=1 SV=2	Translation, ribosomal structure and biogenesis	Molecular Function: structural constituent of ribosome (GO:0003735);; Cellular Component: ribosome (GO:0005840);; Biological Process: translation (GO:0006412);;	molecular function: structural molecule activity (GO:0005198);; cellular component: cell (GO:0005623);; cellular component: macromolecular complex (GO:0032991);; cellular component: organelle (GO:0043226);; cellular component: cell part (GO:0044464);; biological process: metabolic process (GO:0008152);; biological process: cellular process (GO:0009987)	K02962|9.33369e-59|aqu:100636454|40S ribosomal protein S17-like; K02962 small subunit ribosomal protein S17e (A)	Ribosome (ko03010)
c54780.graph_c0	0.135503	1.11858	normal	7.8513e-06	1.55599	up	0.527669	0.443528	normal	gi|470514711|ref|XP_004352819.1|	ribosomal protein L35, putative [Acanthamoeba castellanii str. Neff]	60S ribosomal protein L35 GN=rpl-35 OS=Caenorhabditis elegans PE=3 SV=1	Translation, ribosomal structure and biogenesis	Molecular Function: structural constituent of ribosome (GO:0003735);; Cellular Component: ribosome (GO:0005840);; Biological Process: translation (GO:0006412);;	molecular function: structural molecule activity (GO:0005198);; cellular component: cell (GO:0005623);; cellular component: macromolecular complex (GO:0032991);; cellular component: organelle (GO:0043226);; cellular component: cell part (GO:0044464);; biological process: metabolic process (GO:0008152);; biological process: cellular process (GO:0009987)	K02918|1.5089e-43|xma:102231547|60S ribosomal protein L35-like; K02918 large subunit ribosomal protein L35e (A)	Ribosome (ko03010)
c54794.graph_c0	0.405379	0.356761	normal	0.0213689	-0.784248	normal	0.00411946	-1.13732	down	gi|294887071|ref|XP_002771969.1|	60S ribosomal protein L18, putative [Perkinsus marinus ATCC 50983]	60S ribosomal protein L18 GN=RPL18-B OS=Trypanosoma brucei brucei (strain 927/4 GUTat10.1) PE=1 SV=1	Translation, ribosomal structure and biogenesis	Molecular Function: structural constituent of ribosome (GO:0003735);; Cellular Component: ribosome (GO:0005840);; Biological Process: translation (GO:0006412);;	molecular function: structural molecule activity (GO:0005198);; cellular component: cell (GO:0005623);; cellular component: macromolecular complex (GO:0032991);; cellular component: organelle (GO:0043226);; cellular component: cell part (GO:0044464);; biological process: metabolic process (GO:0008152);; biological process: cellular process (GO:0009987)	K02883|1.77025e-27|nve:NEMVE_v1g236404|hypothetical protein; K02883 large subunit ribosomal protein L18e (A)	Ribosome (ko03010)
c55323.graph_c0	0.0198683	0.818034	normal	0.132733	-0.36077	normal	0.000103251	-1.1747	down	gi|403345031|gb|EJY71870.1|	40S ribosomal protein S15a, putative [Oxytricha trifallax]	40S ribosomal protein S15a GN=RpS15Aa OS=Drosophila yakuba (Fruit fly) PE=2 SV=3	Translation, ribosomal structure and biogenesis	Molecular Function: structural constituent of ribosome (GO:0003735);; Cellular Component: ribosome (GO:0005840);; Biological Process: translation (GO:0006412);;	molecular function: structural molecule activity (GO:0005198);; cellular component: cell (GO:0005623);; cellular component: macromolecular complex (GO:0032991);; cellular component: organelle (GO:0043226);; cellular component: cell part (GO:0044464);; biological process: metabolic process (GO:0008152);; biological process: cellular process (GO:0009987)	K02957|2.07483e-60|api:100159571|ribosomal protein S15A-like; K02957 small subunit ribosomal protein S15Ae (A)	Ribosome (ko03010)
c55439.graph_c0	0.397088	0.659439	normal	3.09219e-05	1.85229	up	0.0292438	1.20155	normal	gi|470514711|ref|XP_004352819.1|	ribosomal protein L35, putative [Acanthamoeba castellanii str. Neff]	60S ribosomal protein L35 GN=rpl-35 OS=Caenorhabditis elegans PE=3 SV=1	Translation, ribosomal structure and biogenesis	Molecular Function: structural constituent of ribosome (GO:0003735);; Cellular Component: ribosome (GO:0005840);; Biological Process: translation (GO:0006412);;	molecular function: structural molecule activity (GO:0005198);; cellular component: cell (GO:0005623);; cellular component: macromolecular complex (GO:0032991);; cellular component: organelle (GO:0043226);; cellular component: cell part (GO:0044464);; biological process: metabolic process (GO:0008152);; biological process: cellular process (GO:0009987)	K02918|1.95492e-44|mze:101467501|60S ribosomal protein L35-like; K02918 large subunit ribosomal protein L35e (A)	Ribosome (ko03010)
c55636.graph_c0	--	--	--	0.000298506	1.52171	up	0.409406	0.665564	normal	gi|669307466|gb|KFD50978.1|	hypothetical protein M513_08161, partial [Trichuris suis]	40S ribosomal protein S16 GN=rps-16 OS=Caenorhabditis elegans PE=1 SV=3	Translation, ribosomal structure and biogenesis	Molecular Function: structural constituent of ribosome (GO:0003735);; Cellular Component: ribosome (GO:0005840);; Biological Process: translation (GO:0006412);;	molecular function: structural molecule activity (GO:0005198);; cellular component: cell (GO:0005623);; cellular component: macromolecular complex (GO:0032991);; cellular component: organelle (GO:0043226);; cellular component: cell part (GO:0044464);; biological process: metabolic process (GO:0008152);; biological process: cellular process (GO:0009987)	K02960|6.58763e-47|tad:TRIADDRAFT_35244|hypothetical protein; K02960 small subunit ribosomal protein S16e (A)	Ribosome (ko03010)
c56054.graph_c0	0.000858428	1.44108	up	0.826989	-0.0915181	normal	0.000309205	-1.52442	down	gi|72011332|gb|AAZ66135.1|	ribosomal protein L29 [Holosticha sp. WJC-2003]	60S ribosomal protein L29 GN=RPL29 OS=Tetrahymena thermophila PE=1 SV=1	Translation, ribosomal structure and biogenesis	Molecular Function: structural constituent of ribosome (GO:0003735);; Cellular Component: ribosome (GO:0005840);; Biological Process: translation (GO:0006412);;	molecular function: structural molecule activity (GO:0005198);; cellular component: cell (GO:0005623);; cellular component: macromolecular complex (GO:0032991);; cellular component: organelle (GO:0043226);; cellular component: cell part (GO:0044464);; biological process: metabolic process (GO:0008152);; biological process: cellular process (GO:0009987)	K02905|2.26292e-12|bmy:Bm1_19125|60S ribosomal protein L29; K02905 large subunit ribosomal protein L29e (A)	Ribosome (ko03010)
c55714.graph_c0	2.25764e-05	1.9297	up	3.0583e-15	2.50217	up	0.212505	0.579105	normal	gi|58414953|gb|AAW73079.1|	polyubiquitin [Thaumatomonas sp. DDM-2005]	60S ribosomal protein L40 (Precursor) OS=Acanthamoeba castellanii (Amoeba) PE=2 SV=2	--	Molecular Function: structural constituent of ribosome (GO:0003735);; Cellular Component: nucleus (GO:0005634);; Cellular Component: ribosome (GO:0005840);; Biological Process: translation (GO:0006412);; Molecular Function: zinc ion binding (GO:0008270);;	molecular function: structural molecule activity (GO:0005198);; cellular component: cell (GO:0005623);; cellular component: organelle (GO:0043226);; cellular component: cell part (GO:0044464);; cellular component: macromolecular complex (GO:0032991);; biological process: metabolic process (GO:0008152);; biological process: cellular process (GO:0009987);; molecular function: binding (GO:0005488)	--	--
c40204.graph_c0	0.381963	0.653592	normal	0.00031368	1.39075	up	0.219697	0.747243	normal	gi|399217583|emb|CCF74470.1|	unnamed protein product [Babesia microti strain RI]	60S ribosomal protein L40 (Precursor) OS=Trypanosoma cruzi PE=2 SV=1	--	Molecular Function: structural constituent of ribosome (GO:0003735);; Cellular Component: nucleus (GO:0005634);; Cellular Component: ribosome (GO:0005840);; Biological Process: translation (GO:0006412);; Molecular Function: metal ion binding (GO:0046872);;	molecular function: structural molecule activity (GO:0005198);; cellular component: cell (GO:0005623);; cellular component: organelle (GO:0043226);; cellular component: cell part (GO:0044464);; cellular component: macromolecular complex (GO:0032991);; biological process: metabolic process (GO:0008152);; biological process: cellular process (GO:0009987);; molecular function: binding (GO:0005488)	K08770|4.79864e-93|bmor:101737132|polyubiquitin-A-like (A)	--
c20669.graph_c0	--	--	--	0.000455266	1.69044	up	0.0555924	1.29425	normal	gi|675868750|ref|XP_009019935.1|	hypothetical protein HELRODRAFT_188740 [Helobdella robusta]	40S ribosomal protein S30 GN=RPS30 OS=Plasmodium falciparum (isolate 3D7) PE=1 SV=1	--	Molecular Function: structural constituent of ribosome (GO:0003735);; Cellular Component: nucleus (GO:0005634);; Cellular Component: ribosome (GO:0005840);; Biological Process: translation (GO:0006412);; Biological Process: intracellular protein transport (GO:0006886);; Molecular Function: Ran GTPase binding (GO:0008536);;	molecular function: structural molecule activity (GO:0005198);; cellular component: cell (GO:0005623);; cellular component: organelle (GO:0043226);; cellular component: cell part (GO:0044464);; cellular component: macromolecular complex (GO:0032991);; biological process: metabolic process (GO:0008152);; biological process: cellular process (GO:0009987);; biological process: localization (GO:00511…	K02983|1.79625e-11|pss:102457081|FAU; Finkel-Biskis-Reilly murine sarcoma virus (FBR-MuSV) ubiquitously expressed; K02983 small subunit ribosomal protein S30e (A)	Ribosome (ko03010)
c31541.graph_c0	0.231609	0.826256	normal	0.00892893	1.08734	up	0.709502	0.265956	normal	gi|10571|emb|CAA32691.1|	unnamed protein product [Trypanosoma brucei]	60S ribosomal protein L40 (Precursor) OS=Trypanosoma brucei brucei PE=1 SV=2	Translation, ribosomal structure and biogenesis	Molecular Function: structural constituent of ribosome (GO:0003735);; Cellular Component: nucleus (GO:0005634);; Cellular Component: ribosome (GO:0005840);; Biological Process: translation (GO:0006412);;	molecular function: structural molecule activity (GO:0005198);; cellular component: cell (GO:0005623);; cellular component: organelle (GO:0043226);; cellular component: cell part (GO:0044464);; cellular component: macromolecular complex (GO:0032991);; biological process: metabolic process (GO:0008152);; biological process: cellular process (GO:0009987)	--	--
c54779.graph_c0	0.156596	1.27726	normal	0.000456449	1.63037	up	0.663812	0.36236	normal	gi|61654754|gb|AAX48903.1|	S27 [Suberites domuncula]	40S ribosomal protein S27 GN=RPS27 OS=Homarus americanus (American lobster) PE=3 SV=2	Translation, ribosomal structure and biogenesis	Molecular Function: structural constituent of ribosome (GO:0003735);; Cellular Component: lipid particle (GO:0005811);; Biological Process: translation (GO:0006412);; Cellular Component: cytosolic small ribosomal subunit (GO:0022627);; Molecular Function: metal ion binding (GO:0046872);;	molecular function: structural molecule activity (GO:0005198);; cellular component: cell (GO:0005623);; cellular component: organelle (GO:0043226);; cellular component: cell part (GO:0044464);; biological process: metabolic process (GO:0008152);; biological process: cellular process (GO:0009987);; cellular component: macromolecular complex (GO:0032991);; cellular component: organelle part (GO:004…	K02978|8.65392e-39|aqu:100640023|40S ribosomal protein S27-like; K02978 small subunit ribosomal protein S27e (A)	Ribosome (ko03010)
c26233.graph_c0	0.218646	0.905299	normal	0.000128187	1.43732	up	0.460701	0.542534	normal	gi|237835795|ref|XP_002367195.1|	40S ribosomal protein S9, putative [Toxoplasma gondii ME49]	40S ribosomal protein S9 GN=rps9 OS=Dictyostelium discoideum (Slime mold) PE=1 SV=1	Translation, ribosomal structure and biogenesis	Molecular Function: structural constituent of ribosome (GO:0003735);; Biological Process: translation (GO:0006412);; Cellular Component: small ribosomal subunit (GO:0015935);; Molecular Function: rRNA binding (GO:0019843);;	molecular function: structural molecule activity (GO:0005198);; biological process: metabolic process (GO:0008152);; biological process: cellular process (GO:0009987);; cellular component: cell (GO:0005623);; cellular component: macromolecular complex (GO:0032991);; cellular component: organelle (GO:0043226);; cellular component: organelle part (GO:0044422);; cellular component: cell part (GO:004…	K02997|1.45448e-81|bfo:BRAFLDRAFT_126921|hypothetical protein; K02997 small subunit ribosomal protein S9e (A)	Ribosome (ko03010)
c40581.graph_c0	0.340243	0.695343	normal	0.000205069	1.38415	up	0.285152	0.699342	normal	gi|237837207|ref|XP_002367901.1|	ribosomal protein S23, putative [Toxoplasma gondii ME49]	40S ribosomal protein S23 GN=RPS23 OS=Lumbricus rubellus (Humus earthworm) PE=2 SV=1	Translation, ribosomal structure and biogenesis	Molecular Function: structural constituent of ribosome (GO:0003735);; Biological Process: translation (GO:0006412);; Cellular Component: small ribosomal subunit (GO:0015935);;	molecular function: structural molecule activity (GO:0005198);; biological process: metabolic process (GO:0008152);; biological process: cellular process (GO:0009987);; cellular component: cell (GO:0005623);; cellular component: macromolecular complex (GO:0032991);; cellular component: organelle (GO:0043226);; cellular component: organelle part (GO:0044422);; cellular component: cell part (GO:004…	K02973|1.41968e-74|cqu:CpipJ_CPIJ001218|40S ribosomal protein S23; K02973 small subunit ribosomal protein S23e (A)	Ribosome (ko03010)
c42096.graph_c0	0.12364	0.979868	normal	8.40263e-07	1.6271	up	0.287057	0.656535	normal	gi|457867069|emb|CCQ18645.1|	60S ribosomal protein L13a [Sycon ciliatum]	60S ribosomal protein L13a GN=RpL13A OS=Spodoptera frugiperda (Fall armyworm) PE=2 SV=1	Translation, ribosomal structure and biogenesis	Molecular Function: structural constituent of ribosome (GO:0003735);; Biological Process: translation (GO:0006412);; Cellular Component: large ribosomal subunit (GO:0015934);;	molecular function: structural molecule activity (GO:0005198);; biological process: metabolic process (GO:0008152);; biological process: cellular process (GO:0009987);; cellular component: cell (GO:0005623);; cellular component: macromolecular complex (GO:0032991);; cellular component: organelle (GO:0043226);; cellular component: organelle part (GO:0044422);; cellular component: cell part (GO:004…	K02872|4.40365e-87|nve:NEMVE_v1g188032|hypothetical protein; K02872 large subunit ribosomal protein L13Ae (A)	Ribosome (ko03010)
c55390.graph_c0	0.544856	0.410963	normal	0.000162254	1.26279	up	0.104416	0.861247	normal	gi|294927999|ref|XP_002779224.1|	60S ribosomal protein L26-1, putative [Perkinsus marinus ATCC 50983]	60S ribosomal protein L26 GN=rpl-26 OS=Caenorhabditis elegans PE=3 SV=1	Translation, ribosomal structure and biogenesis	Molecular Function: structural constituent of ribosome (GO:0003735);; Biological Process: translation (GO:0006412);; Cellular Component: large ribosomal subunit (GO:0015934);;	molecular function: structural molecule activity (GO:0005198);; biological process: metabolic process (GO:0008152);; biological process: cellular process (GO:0009987);; cellular component: cell (GO:0005623);; cellular component: macromolecular complex (GO:0032991);; cellular component: organelle (GO:0043226);; cellular component: organelle part (GO:0044422);; cellular component: cell part (GO:004…	K02898|4.19876e-37|spu:585872|60S ribosomal protein L26-like; K02898 large subunit ribosomal protein L26e (A)	Ribosome (ko03010)
c36141.graph_c0	0.027213	0.715926	normal	0.0696458	-0.425384	normal	3.49504e-05	-1.13672	down	gi|403352859|gb|EJY75953.1|	40S ribosomal protein [Oxytricha trifallax]	40S ribosomal protein S10 GN=rps10 OS=Dictyostelium discoideum (Slime mold) PE=1 SV=3	Translation, ribosomal structure and biogenesis	Molecular Function: structural constituent of ribosome (GO:0003735);; Biological Process: translation (GO:0006412);; Cellular Component: cytosolic small ribosomal subunit (GO:0022627);;	molecular function: structural molecule activity (GO:0005198);; biological process: metabolic process (GO:0008152);; biological process: cellular process (GO:0009987);; cellular component: cell (GO:0005623);; cellular component: macromolecular complex (GO:0032991);; cellular component: organelle (GO:0043226);; cellular component: organelle part (GO:0044422);; cellular component: cell part (GO:004…	K02947|5.20139e-25|aqu:100636629|40S ribosomal protein S10-like; K02947 small subunit ribosomal protein S10e (A)	Ribosome (ko03010)
c40347.graph_c0	0.425356	0.555702	normal	0.000108135	1.50326	up	0.0414571	0.954042	normal	gi|260806989|ref|XP_002598366.1|	hypothetical protein BRAFLDRAFT_69722 [Branchiostoma floridae]	40S ribosomal protein S3a {ECO:0000255|HAMAP-Rule:MF_03122} OS=Suberites domuncula (Sponge) PE=2 SV=1	Translation, ribosomal structure and biogenesis	Molecular Function: structural constituent of ribosome (GO:0003735);; Biological Process: translation (GO:0006412);; Cellular Component: cytosolic small ribosomal subunit (GO:0022627);;	molecular function: structural molecule activity (GO:0005198);; biological process: metabolic process (GO:0008152);; biological process: cellular process (GO:0009987);; cellular component: cell (GO:0005623);; cellular component: macromolecular complex (GO:0032991);; cellular component: organelle (GO:0043226);; cellular component: organelle part (GO:0044422);; cellular component: cell part (GO:004…	K02984|1.51487e-47|bfo:BRAFLDRAFT_69722|hypothetical protein; K02984 small subunit ribosomal protein S3Ae (A)	Ribosome (ko03010)
c53052.graph_c0	9.31595e-18	2.70202	up	0.401656	-0.256779	normal	1.80778e-25	-2.95802	down	gi|403363459|gb|EJY81472.1|	Cobalamin-dependent methionine synthase [Oxytricha trifallax]	Methionine synthase GN=mtr OS=Dictyostelium discoideum (Slime mold) PE=3 SV=1	--	Molecular Function: S-methyltransferase activity (GO:0008172);; Biological Process: cellular amino acid biosynthetic process (GO:0008652);; Biological Process: secretion by cell (GO:0032940);; Molecular Function: metal ion binding (GO:0046872);;	molecular function: catalytic activity (GO:0003824);; biological process: metabolic process (GO:0008152);; biological process: cellular process (GO:0009987);; biological process: single-organism process (GO:0044699);; biological process: localization (GO:0051179);; molecular function: binding (GO:0005488)	K00548|0|cmy:102931264|MTR; 5-methyltetrahydrofolate-homocysteine methyltransferase; K00548 5-methyltetrahydrofolate--homocysteine methyltransferase [EC:2.1.1.13] (A)	Cysteine and methionine metabolism (ko00270);; Selenocompound metabolism (ko00450);; One carbon pool by folate (ko00670);; Biosynthesis of amino acids (ko01230)
c37284.graph_c0	5.92449e-11	-3.14113	down	1.59203e-23	-5.29357	down	--	--	--	gi|557189844|emb|CDI85656.1|	ubiquitin-conjugating enzyme e2, putative [Eimeria praecox]	SUMO-conjugating enzyme UBC9 GN=ubc-9 OS=Caenorhabditis elegans PE=1 SV=1	Posttranslational modification, protein turnover, chaperones	Molecular Function: small conjugating protein transferase activity (GO:0019787);;	molecular function: catalytic activity (GO:0003824);; biological process: metabolic process (GO:0008152)	K10577|1.39413e-54|tru:101077155|SUMO-conjugating enzyme UBC9-like; K10577 ubiquitin-conjugating enzyme E2 I [EC:6.3.2.19] (A)	RNA transport (ko03013);; Ubiquitin mediated proteolysis (ko04120)
c34001.graph_c0	0.362188	0.397242	normal	0.0179375	-0.632926	normal	0.000844668	-1.02458	down	gi|220715324|gb|ACL81233.1|	selenoprotein W [Moneuplotes crassus]	--	--	Molecular Function: selenium binding (GO:0008430);; Biological Process: cell redox homeostasis (GO:0045454);;	molecular function: binding (GO:0005488);; biological process: cellular process (GO:0009987);; biological process: single-organism process (GO:0044699);; biological process: biological regulation (GO:0065007)	--	--
c18927.graph_c0	7.63627e-05	-1.8806	down	0.0167353	-0.867425	normal	0.0903069	1.02246	normal	gi|678337532|emb|CDW75429.1|	uncharacterized methyltransferase wbscr22-like [Stylonychia lemnae]	Probable 18S rRNA (guanine-N(7))-methyltransferase GN=DDB_G0269722 OS=Dictyostelium discoideum (Slime mold) PE=3 SV=1	General function prediction only	Molecular Function: S-adenosylmethionine-dependent methyltransferase activity (GO:0008757);; Biological Process: neurogenesis (GO:0022008);;	molecular function: catalytic activity (GO:0003824);; biological process: metabolic process (GO:0008152);; biological process: cellular process (GO:0009987);; biological process: multicellular organismal process (GO:0032501);; biological process: developmental process (GO:0032502);; biological process: single-organism process (GO:0044699)	--	--
c25401.graph_c0	0.470907	0.620803	normal	1.96453e-05	1.34019	up	0.27952	0.725911	normal	gi|470432754|ref|XP_004338523.1|	methyltransferase domain containing protein [Acanthamoeba castellanii str. Neff]	Sterol 4-C-methyltransferase strm-1 GN=strm-1 OS=Caenorhabditis elegans PE=3 SV=2	--	Molecular Function: S-adenosylmethionine-dependent methyltransferase activity (GO:0008757);; Biological Process: methylation (GO:0032259);;	molecular function: catalytic activity (GO:0003824);; biological process: metabolic process (GO:0008152)	--	--
c30210.graph_c0	5.41277e-05	2.19048	up	0.000191672	1.35628	up	0.138156	-0.824955	normal	gi|735856701|dbj|GAM20935.1|	hypothetical protein SAMD00019534_041100 [Acytostelium subglobosum LB1]	Eukaryotic translation initiation factor 4E GN=eIF-4E OS=Drosophila melanogaster (Fruit fly) PE=1 SV=1	Translation, ribosomal structure and biogenesis	Molecular Function: RNA cap binding (GO:0000339);; Biological Process: regulation of cell growth (GO:0001558);; Molecular Function: protein binding (GO:0005515);; Biological Process: translation (GO:0006412);; Biological Process: mitotic spindle organization (GO:0007052);; Biological Process: chromosome segregation (GO:0007059);; Biological Process: mitotic nuclear division (GO:0007067);; Cellula…	molecular function: binding (GO:0005488);; biological process: biological regulation (GO:0065007);; biological process: metabolic process (GO:0008152);; biological process: cellular process (GO:0009987);; biological process: single-organism process (GO:0044699);; biological process: cellular component organization or biogenesis (GO:0071840);; cellular component: macromolecular complex (GO:0032991…	K03259|4.05628e-15|bmor:732913|mRNA cap-binding protein eIF4E; K03259 translation initiation factor 4E (A)	RNA transport (ko03013);; mTOR signaling pathway (ko04150)
c20510.graph_c0	0.236258	0.800912	normal	3.24078e-05	1.46613	up	0.234244	0.673539	normal	gi|291231232|ref|XP_002735558.1|	PREDICTED: 40S ribosomal protein S15-like [Saccoglossus kowalevskii]	40S ribosomal protein S15 OS=Caenorhabditis elegans PE=1 SV=3	Translation, ribosomal structure and biogenesis	Molecular Function: RNA binding (GO:0003723);; Molecular Function: structural constituent of ribosome (GO:0003735);; Biological Process: translation (GO:0006412);; Cellular Component: small ribosomal subunit (GO:0015935);;	molecular function: binding (GO:0005488);; molecular function: structural molecule activity (GO:0005198);; biological process: metabolic process (GO:0008152);; biological process: cellular process (GO:0009987);; cellular component: cell (GO:0005623);; cellular component: macromolecular complex (GO:0032991);; cellular component: organelle (GO:0043226);; cellular component: organelle part (GO:00444…	K02958|2.1219e-59|asn:102376590|RPS15; ribosomal protein S15; K02958 small subunit ribosomal protein S15e (A)	Ribosome (ko03010)
c30910.graph_c0	0.224617	0.844476	normal	1.74391e-05	1.54621	up	0.246891	0.711593	normal	gi|198434172|ref|XP_002129244.1|	PREDICTED: 40S ribosomal protein S3 [Ciona intestinalis]	40S ribosomal protein S3 GN=RpS3 OS=Drosophila melanogaster (Fruit fly) PE=1 SV=1	Translation, ribosomal structure and biogenesis	Molecular Function: RNA binding (GO:0003723);; Molecular Function: structural constituent of ribosome (GO:0003735);; Biological Process: translation (GO:0006412);; Cellular Component: small ribosomal subunit (GO:0015935);;	molecular function: binding (GO:0005488);; molecular function: structural molecule activity (GO:0005198);; biological process: metabolic process (GO:0008152);; biological process: cellular process (GO:0009987);; cellular component: cell (GO:0005623);; cellular component: macromolecular complex (GO:0032991);; cellular component: organelle (GO:0043226);; cellular component: organelle part (GO:00444…	K02985|6.55393e-108|asn:102372296|40S ribosomal protein S3-like; K02985 small subunit ribosomal protein S3e (A)	Ribosome (ko03010)
c52198.graph_c0	0.182782	1.15341	normal	0.000964764	1.65954	up	0.479307	0.515455	normal	gi|156374958|ref|XP_001629850.1|	predicted protein [Nematostella vectensis]	40S ribosomal protein S20 GN=RpS20 OS=Drosophila melanogaster (Fruit fly) PE=1 SV=1	Translation, ribosomal structure and biogenesis	Molecular Function: RNA binding (GO:0003723);; Molecular Function: structural constituent of ribosome (GO:0003735);; Biological Process: translation (GO:0006412);; Cellular Component: small ribosomal subunit (GO:0015935);;	molecular function: binding (GO:0005488);; molecular function: structural molecule activity (GO:0005198);; biological process: metabolic process (GO:0008152);; biological process: cellular process (GO:0009987);; cellular component: cell (GO:0005623);; cellular component: macromolecular complex (GO:0032991);; cellular component: organelle (GO:0043226);; cellular component: organelle part (GO:00444…	K02969|4.11764e-49|nve:NEMVE_v1g188999|hypothetical protein; K02969 small subunit ribosomal protein S20e (A)	Ribosome (ko03010)
c52207.graph_c0	0.161227	0.986766	normal	0.00260492	1.31482	up	0.652658	0.341329	normal	gi|156374958|ref|XP_001629850.1|	predicted protein [Nematostella vectensis]	40S ribosomal protein S20 GN=RpS20 OS=Drosophila melanogaster (Fruit fly) PE=1 SV=1	Translation, ribosomal structure and biogenesis	Molecular Function: RNA binding (GO:0003723);; Molecular Function: structural constituent of ribosome (GO:0003735);; Biological Process: translation (GO:0006412);; Cellular Component: small ribosomal subunit (GO:0015935);;	molecular function: binding (GO:0005488);; molecular function: structural molecule activity (GO:0005198);; biological process: metabolic process (GO:0008152);; biological process: cellular process (GO:0009987);; cellular component: cell (GO:0005623);; cellular component: macromolecular complex (GO:0032991);; cellular component: organelle (GO:0043226);; cellular component: organelle part (GO:00444…	K02969|4.41893e-48|nve:NEMVE_v1g188999|hypothetical protein; K02969 small subunit ribosomal protein S20e (A)	Ribosome (ko03010)
c54188.graph_c0	0.251282	0.840765	normal	5.09768e-06	1.52959	up	0.270883	0.69817	normal	gi|291231232|ref|XP_002735558.1|	PREDICTED: 40S ribosomal protein S15-like [Saccoglossus kowalevskii]	40S ribosomal protein S15 OS=Caenorhabditis elegans PE=1 SV=3	Translation, ribosomal structure and biogenesis	Molecular Function: RNA binding (GO:0003723);; Molecular Function: structural constituent of ribosome (GO:0003735);; Biological Process: translation (GO:0006412);; Cellular Component: small ribosomal subunit (GO:0015935);;	molecular function: binding (GO:0005488);; molecular function: structural molecule activity (GO:0005198);; biological process: metabolic process (GO:0008152);; biological process: cellular process (GO:0009987);; cellular component: cell (GO:0005623);; cellular component: macromolecular complex (GO:0032991);; cellular component: organelle (GO:0043226);; cellular component: organelle part (GO:00444…	K02958|1.00866e-55|mcf:102122855|RPS15; ribosomal protein S15; K02958 small subunit ribosomal protein S15e (A)	Ribosome (ko03010)
c26849.graph_c0	0.344487	0.596174	normal	0.000204471	1.32382	up	0.181137	0.737956	normal	gi|399219181|emb|CCF76068.1|	unnamed protein product [Babesia microti strain RI]	60S ribosomal protein L10a GN=RpL10A OS=Spodoptera frugiperda (Fall armyworm) PE=2 SV=1	Translation, ribosomal structure and biogenesis	Molecular Function: RNA binding (GO:0003723);; Molecular Function: structural constituent of ribosome (GO:0003735);; Biological Process: translation (GO:0006412);; Cellular Component: large ribosomal subunit (GO:0015934);;	molecular function: binding (GO:0005488);; molecular function: structural molecule activity (GO:0005198);; biological process: metabolic process (GO:0008152);; biological process: cellular process (GO:0009987);; cellular component: cell (GO:0005623);; cellular component: macromolecular complex (GO:0032991);; cellular component: organelle (GO:0043226);; cellular component: organelle part (GO:00444…	K02865|6.65616e-88|ame:413868|RpL10Ab, GB19558; ribosomal protein L10Ab; K02865 large subunit ribosomal protein L10Ae (A)	Ribosome (ko03010)
c36517.graph_c0	0.000156514	-1.35249	down	3.3644e-08	-1.54334	down	0.798853	-0.179368	normal	gi|403352245|gb|EJY75628.1|	ATP-dependent RNA helicase Has1 [Oxytricha trifallax]	Probable ATP-dependent RNA helicase ddx18 GN=ddx18 OS=Dictyostelium discoideum (Slime mold) PE=3 SV=1	RNA processing and modification	Molecular Function: RNA binding (GO:0003723);; Molecular Function: ATP binding (GO:0005524);; Molecular Function: ATP-dependent helicase activity (GO:0008026);; Molecular Function: isomerase activity (GO:0016853);;	molecular function: binding (GO:0005488);; molecular function: catalytic activity (GO:0003824);; biological process: metabolic process (GO:0008152);; biological process: cellular process (GO:0009987);; biological process: single-organism process (GO:0044699)	K13179|0|nve:NEMVE_v1g112850|hypothetical protein; K13179 ATP-dependent RNA helicase DDX18/HAS1 [EC:3.6.4.13] (A)	--
c27117.graph_c0	--	--	--	0.00479449	1.65741	up	0.0250327	1.5672	normal	gi|330796706|ref|XP_003286406.1|	hypothetical protein DICPUDRAFT_87126 [Dictyostelium purpureum]	--	--	Molecular Function: RNA binding (GO:0003723);; Molecular Function: actin binding (GO:0003779);; Molecular Function: hormone activity (GO:0005179);; Cellular Component: extracellular region (GO:0005576);; Cellular Component: nucleus (GO:0005634);; Cellular Component: cytoplasm (GO:0005737);; Biological Process: mRNA processing (GO:0006397);; Biological Process: actin filament organization (GO:0007…	molecular function: binding (GO:0005488);; cellular component: extracellular region (GO:0005576);; cellular component: cell (GO:0005623);; cellular component: organelle (GO:0043226);; cellular component: cell part (GO:0044464);; biological process: metabolic process (GO:0008152);; biological process: cellular process (GO:0009987);; biological process: single-organism process (GO:0044699);; biolog…	K05747|2.87178e-13|cfa:491867|WAS; Wiskott-Aldrich syndrome; K05747 Wiskott-Aldrich syndrome protein (A)	Chemokine signaling pathway (ko04062);; Adherens junction (ko04520);; Fc gamma R-mediated phagocytosis (ko04666);; Regulation of actin cytoskeleton (ko04810);; Bacterial invasion of epithelial cells (ko05100);; Salmonella infection (ko05132);; Choline metabolism in cancer (ko05231)
c42758.graph_c0	--	--	--	0.0033999	1.4169	up	0.00554808	1.61635	up	gi|470457893|ref|XP_004341183.1|	P21Rho-binding domain containing protein [Acanthamoeba castellanii str. Neff]	--	--	Molecular Function: RNA binding (GO:0003723);; Molecular Function: actin binding (GO:0003779);; Molecular Function: hormone activity (GO:0005179);; Cellular Component: extracellular region (GO:0005576);; Cellular Component: nucleus (GO:0005634);; Cellular Component: cytoplasm (GO:0005737);; Biological Process: mRNA processing (GO:0006397);; Biological Process: actin filament organization (GO:0007…	molecular function: binding (GO:0005488);; cellular component: extracellular region (GO:0005576);; cellular component: cell (GO:0005623);; cellular component: organelle (GO:0043226);; cellular component: cell part (GO:0044464);; biological process: metabolic process (GO:0008152);; biological process: cellular process (GO:0009987);; biological process: single-organism process (GO:0044699);; biolog…	K05747|5.39948e-12|cfa:491867|WAS; Wiskott-Aldrich syndrome; K05747 Wiskott-Aldrich syndrome protein (A)	Chemokine signaling pathway (ko04062);; Adherens junction (ko04520);; Fc gamma R-mediated phagocytosis (ko04666);; Regulation of actin cytoskeleton (ko04810);; Bacterial invasion of epithelial cells (ko05100);; Salmonella infection (ko05132);; Choline metabolism in cancer (ko05231)
c19312.graph_c0	0.280594	-0.676039	normal	0.00448307	-1.2861	down	--	--	--	gi|678340465|emb|CDW73933.1|	small nucleolar ribonucleoprotein u3 component [Stylonychia lemnae]	Putative 40S ribosomal protein S4-like GN=C48B6.2 OS=Caenorhabditis elegans PE=3 SV=1	RNA processing and modification	Molecular Function: RNA binding (GO:0003723);; Cellular Component: ribonucleoprotein complex (GO:0030529);;	molecular function: binding (GO:0005488);; cellular component: cell (GO:0005623);; cellular component: macromolecular complex (GO:0032991);; cellular component: cell part (GO:0044464)	K14560|1.14438e-62|nve:NEMVE_v1g181859|hypothetical protein; K14560 U3 small nucleolar ribonucleoprotein protein IMP3 (A)	Ribosome biogenesis in eukaryotes (ko03008)
c20333.graph_c0	0.0481401	-1.05172	normal	0.00320818	-1.2823	down	--	--	--	gi|403339159|gb|EJY68829.1|	Ribosomal RNA assembly protein, putative [Oxytricha trifallax]	KRR1 small subunit processome component homolog {ECO:0000250|UniProtKB:Q9VPU8} OS=Drosophila mojavensis (Fruit fly) PE=3 SV=1	--	Molecular Function: RNA binding (GO:0003723);; Cellular Component: nucleolus (GO:0005730);; Biological Process: rRNA processing (GO:0006364);; Molecular Function: hydrolase activity (GO:0016787);; Cellular Component: ribonucleoprotein complex (GO:0030529);;	molecular function: binding (GO:0005488);; cellular component: cell (GO:0005623);; cellular component: membrane-enclosed lumen (GO:0031974);; cellular component: organelle (GO:0043226);; cellular component: organelle part (GO:0044422);; cellular component: cell part (GO:0044464);; biological process: metabolic process (GO:0008152);; biological process: cellular process (GO:0009987);; biological p…	K06961|7.28076e-109|tad:TRIADDRAFT_51950|hypothetical protein; K06961 ribosomal RNA assembly protein (A)	--
c34739.graph_c0	0.21582	0.987658	normal	0.00150769	1.57915	up	0.414764	0.603776	normal	gi|646704395|gb|KDR12598.1|	rRNA 2&apos;-O-methyltransferase fibrillarin [Zootermopsis nevadensis]	rRNA 2&apos;-O-methyltransferase fibrillarin OS=Drosophila melanogaster (Fruit fly) PE=2 SV=1	RNA processing and modification	Molecular Function: RNA binding (GO:0003723);; Biological Process: rRNA processing (GO:0006364);; Biological Process: tRNA processing (GO:0008033);; Molecular Function: methyltransferase activity (GO:0008168);; Biological Process: methylation (GO:0032259);;	molecular function: binding (GO:0005488);; biological process: metabolic process (GO:0008152);; biological process: cellular process (GO:0009987);; biological process: cellular component organization or biogenesis (GO:0071840);; molecular function: catalytic activity (GO:0003824)	K14563|6.19751e-128|api:100168263|Fib; fibrillarin; K14563 rRNA 2'-O-methyltransferase fibrillarin [EC:2.1.1.-] (A)	Ribosome biogenesis in eukaryotes (ko03008)
c19907.graph_c0	0.38051	-0.318892	normal	1.27447e-10	-1.78291	down	1.79621e-05	-1.45783	down	gi|403343651|gb|EJY71156.1|	RNA-binding proteins (RRM domain) [Oxytricha trifallax]	Polyadenylate-binding protein GN=pAbp OS=Drosophila melanogaster (Fruit fly) PE=1 SV=3	Transcription	Molecular Function: RNA binding (GO:0003723);; Biological Process: multicellular organismal development (GO:0007275);; Biological Process: anatomical structure morphogenesis (GO:0009653);; Biological Process: reproductive process (GO:0022414);; Cellular Component: ribonucleoprotein granule (GO:0035770);; Biological Process: growth (GO:0040007);; Cellular Component: cytoplasmic part (GO:0044444);;…	molecular function: binding (GO:0005488);; biological process: multicellular organismal process (GO:0032501);; biological process: developmental process (GO:0032502);; biological process: single-organism process (GO:0044699);; biological process: reproductive process (GO:0022414);; cellular component: cell (GO:0005623);; cellular component: macromolecular complex (GO:0032991);; cellular component…	K11294|6.75036e-21|pss:102447130|NCL; nucleolin; K11294 nucleolin (A)	--
c26420.graph_c0	3.31637e-05	1.09189	up	0.0866692	0.402627	normal	0.00797507	-0.685548	normal	gi|656183418|emb|CDR94259.1|	polyadenylate binding protein, putative [Babesia bigemina]	Polyadenylate-binding protein GN=pAbp OS=Drosophila melanogaster (Fruit fly) PE=1 SV=3	--	Molecular Function: RNA binding (GO:0003723);; Biological Process: multicellular organismal development (GO:0007275);; Biological Process: anatomical structure morphogenesis (GO:0009653);; Biological Process: reproductive process (GO:0022414);; Cellular Component: ribonucleoprotein granule (GO:0035770);; Biological Process: growth (GO:0040007);; Cellular Component: cytoplasmic part (GO:0044444);;…	molecular function: binding (GO:0005488);; biological process: multicellular organismal process (GO:0032501);; biological process: developmental process (GO:0032502);; biological process: single-organism process (GO:0044699);; biological process: reproductive process (GO:0022414);; cellular component: cell (GO:0005623);; cellular component: macromolecular complex (GO:0032991);; cellular component…	K13126|6.27654e-36|tca:657776|polyadenylate-binding protein 1; K13126 polyadenylate-binding protein (A)	RNA transport (ko03013);; mRNA surveillance pathway (ko03015);; RNA degradation (ko03018)
c54293.graph_c0	0.000281546	-0.991538	normal	1.35613e-06	-1.15217	down	0.67658	-0.155717	normal	gi|685834918|emb|CEF69839.1|	Polyadenylate-binding protein 4 [Strongyloides ratti]	Polyadenylate-binding protein 1-A GN=pabpc1A OS=Dictyostelium discoideum (Slime mold) PE=1 SV=1	--	Molecular Function: RNA binding (GO:0003723);; Biological Process: multicellular organismal development (GO:0007275);; Biological Process: anatomical structure morphogenesis (GO:0009653);; Biological Process: reproductive process (GO:0022414);; Cellular Component: ribonucleoprotein granule (GO:0035770);; Biological Process: growth (GO:0040007);; Cellular Component: cytoplasmic part (GO:0044444);;…	molecular function: binding (GO:0005488);; biological process: multicellular organismal process (GO:0032501);; biological process: developmental process (GO:0032502);; biological process: single-organism process (GO:0044699);; biological process: reproductive process (GO:0022414);; cellular component: cell (GO:0005623);; cellular component: macromolecular complex (GO:0032991);; cellular component…	K13126|2.37159e-32|ola:101169122|polyadenylate-binding protein 1-like; K13126 polyadenylate-binding protein (A)	RNA transport (ko03013);; mRNA surveillance pathway (ko03015);; RNA degradation (ko03018)
c35876.graph_c0	0.0456401	0.592631	normal	8.43911e-31	2.57291	up	4.48064e-16	1.98351	up	gi|678331516|emb|CDW78567.1|	ribonucleoside-diphosphate reductase [Stylonychia lemnae]	Ribonucleoside-diphosphate reductase large subunit GN=RNR1 OS=Plasmodium falciparum (isolate Dd2) PE=2 SV=1	Nucleotide transport and metabolism	Molecular Function: ribonucleoside-diphosphate reductase activity, thioredoxin disulfide as acceptor (GO:0004748);; Molecular Function: ATP binding (GO:0005524);; Cellular Component: ribonucleoside-diphosphate reductase complex (GO:0005971);; Biological Process: DNA replication (GO:0006260);; Biological Process: deoxyribonucleotide biosynthetic process (GO:0009263);; Biological Process: oxidation…	molecular function: catalytic activity (GO:0003824);; biological process: metabolic process (GO:0008152);; biological process: single-organism process (GO:0044699);; molecular function: binding (GO:0005488);; cellular component: cell (GO:0005623);; cellular component: macromolecular complex (GO:0032991);; cellular component: cell part (GO:0044464);; biological process: cellular process (GO:000998…	K10807|0|tad:TRIADDRAFT_50804|hypothetical protein; K10807 ribonucleoside-diphosphate reductase subunit M1 [EC:1.17.4.1] (A)	Purine metabolism (ko00230);; Pyrimidine metabolism (ko00240);; Glutathione metabolism (ko00480)
c38940.graph_c0	0.417388	0.309663	normal	3.52424e-15	2.0518	up	1.38408e-10	1.74849	up	gi|403371741|gb|EJY85755.1|	Ribonucleoside-diphosphate reductase small chain [Oxytricha trifallax]	Ribonucleoside-diphosphate reductase small chain GN=RNR2 OS=Trypanosoma brucei brucei PE=2 SV=1	Nucleotide transport and metabolism	Molecular Function: ribonucleoside-diphosphate reductase activity, thioredoxin disulfide as acceptor (GO:0004748);; Biological Process: deoxyribonucleoside diphosphate metabolic process (GO:0009186);; Molecular Function: transition metal ion binding (GO:0046914);; Biological Process: oxidation-reduction process (GO:0055114);;	molecular function: catalytic activity (GO:0003824);; biological process: metabolic process (GO:0008152);; biological process: single-organism process (GO:0044699);; biological process: cellular process (GO:0009987);; molecular function: binding (GO:0005488)	K10808|4.40752e-154|aqu:100638359|ribonucleoside-diphosphate reductase subunit M2-like; K10808 ribonucleoside-diphosphate reductase subunit M2 [EC:1.17.4.1] (A)	Purine metabolism (ko00230);; Pyrimidine metabolism (ko00240);; Glutathione metabolism (ko00480)
c20583.graph_c0	0.057876	-0.647196	normal	1.36286e-05	-1.15863	down	0.116909	-0.511348	normal	gi|403341920|gb|EJY70276.1|	Helicase [Oxytricha trifallax]	Putative DNA helicase Ino80 OS=Drosophila melanogaster (Fruit fly) PE=1 SV=2	Replication, recombination and repair	Molecular Function: regulatory region DNA binding (GO:0000975);; Cellular Component: polytene chromosome (GO:0005700);; Biological Process: regulation of gene expression (GO:0010468);; Cellular Component: Ino80 complex (GO:0031011);;	molecular function: binding (GO:0005488);; cellular component: cell (GO:0005623);; cellular component: organelle (GO:0043226);; cellular component: cell part (GO:0044464);; biological process: biological regulation (GO:0065007);; cellular component: membrane-enclosed lumen (GO:0031974);; cellular component: macromolecular complex (GO:0032991);; cellular component: organelle part (GO:0044422)	K11665|0|dvi:Dvir_GJ24541|GJ24541 gene product from transcript GJ24541-RA; K11665 DNA helicase INO80 [EC:3.6.4.12] (A)	--
c43958.graph_c0	0.453714	-0.272052	normal	1.08282e-10	-1.42704	down	4.31085e-06	-1.15079	down	gi|54299968|gb|AAV32675.1|	mitochondrial pyruvate dehydrogenase E1 beta subunit [Euplotes sp. BB-2004]	Pyruvate dehydrogenase E1 component subunit beta, mitochondrial (Precursor) GN=pdhB OS=Dictyostelium discoideum (Slime mold) PE=1 SV=1	Energy production and conversion	Molecular Function: pyruvate dehydrogenase (acetyl-transferring) activity (GO:0004739);; Cellular Component: nucleus (GO:0005634);; Biological Process: acetyl-CoA biosynthetic process from pyruvate (GO:0006086);; Biological Process: ribosome biogenesis (GO:0042254);; Biological Process: oxidation-reduction process (GO:0055114);;	molecular function: catalytic activity (GO:0003824);; biological process: metabolic process (GO:0008152);; biological process: single-organism process (GO:0044699);; cellular component: cell (GO:0005623);; cellular component: organelle (GO:0043226);; cellular component: cell part (GO:0044464);; biological process: cellular process (GO:0009987);; biological process: cellular component organization…	K00162|1.38865e-156|pbi:103061896|PDHB; pyruvate dehydrogenase (lipoamide) beta; K00162 pyruvate dehydrogenase E1 component beta subunit [EC:1.2.4.1] (A)	Glycolysis / Gluconeogenesis (ko00010);; Citrate cycle (TCA cycle) (ko00020);; Pyruvate metabolism (ko00620);; Carbon metabolism (ko01200)
c39889.graph_c0	0.121502	-0.472535	normal	1.77694e-13	-1.55089	down	1.27686e-05	-1.07486	down	gi|54289519|gb|AAV32066.1|	pyruvate dehydrogenase E1 alpha subunit [Euplotes sp. BB-2004]	Probable pyruvate dehydrogenase E1 component subunit alpha, mitochondrial (Precursor) GN=T05H10.6 OS=Caenorhabditis elegans PE=3 SV=1	Energy production and conversion	Molecular Function: pyruvate dehydrogenase (acetyl-transferring) activity (GO:0004739);; Cellular Component: mitochondrion (GO:0005739);; Biological Process: glycolytic process (GO:0006096);; Biological Process: receptor-mediated endocytosis (GO:0006898);; Biological Process: determination of adult lifespan (GO:0008340);; Biological Process: gonad development (GO:0008406);; Biological Process: em…	molecular function: catalytic activity (GO:0003824);; biological process: metabolic process (GO:0008152);; biological process: single-organism process (GO:0044699);; cellular component: cell (GO:0005623);; cellular component: organelle (GO:0043226);; cellular component: cell part (GO:0044464);; biological process: cellular process (GO:0009987);; biological process: localization (GO:0051179);; bio…	K00161|1.22726e-125|dre:406702|pdha1a, im:6895726, pdha1, wu:fd18b01, wu:fo96f03, zgc:73271, zgc:86692; pyruvate dehydrogenase (lipoamide) alpha 1a (EC:1.2.4.1); K00161 pyruvate dehydrogenase E1 component alpha subunit [EC:1.2.4.1] (A)	Glycolysis / Gluconeogenesis (ko00010);; Citrate cycle (TCA cycle) (ko00020);; Pyruvate metabolism (ko00620);; Carbon metabolism (ko01200)
c40544.graph_c0	0.138087	1.28574	normal	0.000347748	1.80281	up	0.527669	0.528733	normal	gi|66818919|ref|XP_643119.1|	pyruvate dehydrogenase E1 beta subunit [Dictyostelium discoideum AX4]	Pyruvate dehydrogenase E1 component subunit beta, mitochondrial (Precursor) GN=pdhB OS=Dictyostelium discoideum (Slime mold) PE=1 SV=1	Energy production and conversion	Molecular Function: pyruvate dehydrogenase (acetyl-transferring) activity (GO:0004739);; Biological Process: acetyl-CoA biosynthetic process from pyruvate (GO:0006086);; Biological Process: oxidation-reduction process (GO:0055114);;	molecular function: catalytic activity (GO:0003824);; biological process: metabolic process (GO:0008152);; biological process: single-organism process (GO:0044699);; biological process: cellular process (GO:0009987)	K00162|6.19107e-154|xla:398064|pdhb-b, pdhb, pdhe1beta-2; pyruvate dehydrogenase (lipoamide) beta (EC:1.2.4.1); K00162 pyruvate dehydrogenase E1 component beta subunit [EC:1.2.4.1] (A)	Glycolysis / Gluconeogenesis (ko00010);; Citrate cycle (TCA cycle) (ko00020);; Pyruvate metabolism (ko00620);; Carbon metabolism (ko01200)
c42850.graph_c0	--	--	--	0.00971941	1.36634	up	0.0482771	1.32962	normal	gi|735853726|dbj|GAM24058.1|	hypothetical protein SAMD00019534_072330 [Acytostelium subglobosum LB1]	Calcineurin subunit A GN=canA OS=Dictyostelium discoideum (Slime mold) PE=1 SV=1	General function prediction only	Molecular Function: protein serine/threonine phosphatase activity (GO:0004722);; Molecular Function: calcium ion binding (GO:0005509);; Molecular Function: protein binding (GO:0005515);; Cellular Component: nucleus (GO:0005634);; Cellular Component: cytoplasm (GO:0005737);; Cellular Component: cilium (GO:0005929);; Biological Process: transport (GO:0006810);; Biological Process: chemotaxis (GO:00…	molecular function: catalytic activity (GO:0003824);; biological process: metabolic process (GO:0008152);; biological process: cellular process (GO:0009987);; molecular function: binding (GO:0005488);; cellular component: cell (GO:0005623);; cellular component: organelle (GO:0043226);; cellular component: cell part (GO:0044464);; biological process: localization (GO:0051179);; biological process:…	K04348|5.33177e-173|mdo:100033104|PPP3CC; protein phosphatase 3, catalytic subunit, gamma isozyme; K04348 serine/threonine-protein phosphatase 2B catalytic subunit [EC:3.1.3.16] (A)	MAPK signaling pathway (ko04010);; Calcium signaling pathway (ko04020);; cGMP-PKG signaling pathway (ko04022);; Oocyte meiosis (ko04114);; Apoptosis (ko04210);; Wnt signaling pathway (ko04310);; Axon guidance (ko04360);; VEGF signaling pathway (ko04370);; Osteoclast differentiation (ko04380);; Natural killer cell mediated cytotoxicity (ko04650);; T cell receptor signaling pathway (ko04660);; B ce…
c18816.graph_c0	0.00240594	-0.833626	normal	1.7273e-07	-1.12208	down	0.364906	-0.286507	normal	gi|403348477|gb|EJY73676.1|	Serine/threonine protein kinase [Oxytricha trifallax]	Casein kinase I OS=Eimeria tenella (Coccidian parasite) PE=2 SV=1	Signal transduction mechanisms	Molecular Function: protein serine/threonine kinase activity (GO:0004674);; Molecular Function: non-membrane spanning protein tyrosine kinase activity (GO:0004715);; Molecular Function: ATP binding (GO:0005524);; Biological Process: protein phosphorylation (GO:0006468);;	molecular function: catalytic activity (GO:0003824);; biological process: metabolic process (GO:0008152);; biological process: cellular process (GO:0009987);; biological process: single-organism process (GO:0044699);; molecular function: binding (GO:0005488)	K08960|2.29656e-96|chx:102180576|casein kinase I isoform epsilon-like; K08960 casein kinase 1, epsilon [EC:2.7.11.1] (A)	FoxO signaling pathway (ko04068);; Wnt signaling pathway (ko04310);; Hedgehog signaling pathway (ko04340);; Hippo signaling pathway (ko04390);; Circadian rhythm (ko04710)
c20350.graph_c0	2.14849e-08	-1.55467	down	5.54451e-07	-1.25332	down	0.420588	0.303507	normal	gi|74039779|gb|AAZ94913.1|	putative calcium-dependant protein kinase [Moneuplotes crassus]	Calcium-dependent protein kinase 3 GN=CPK3 OS=Plasmodium falciparum (isolate 3D7) PE=1 SV=1	Signal transduction mechanisms	Molecular Function: protein serine/threonine kinase activity (GO:0004674);; Molecular Function: calcium ion binding (GO:0005509);; Molecular Function: ATP binding (GO:0005524);; Biological Process: protein phosphorylation (GO:0006468);;	molecular function: catalytic activity (GO:0003824);; biological process: metabolic process (GO:0008152);; biological process: cellular process (GO:0009987);; molecular function: binding (GO:0005488)	K08794|2.57326e-52|cmk:103190612|calcium/calmodulin-dependent protein kinase type 1-like; K08794 calcium/calmodulin-dependent protein kinase I [EC:2.7.11.17] (A)	--
c54997.graph_c0	0.683018	-0.16712	normal	1.18235e-07	-1.25001	down	0.000118534	-1.07992	down	gi|118378700|ref|XP_001022524.1|	Protein kinase domain containing protein [Tetrahymena thermophila]	Calcium-dependent protein kinase 3 GN=CPK3 OS=Plasmodium falciparum (isolate 3D7) PE=1 SV=1	Signal transduction mechanisms	Molecular Function: protein serine/threonine kinase activity (GO:0004674);; Molecular Function: binding (GO:0005488);;	molecular function: catalytic activity (GO:0003824);; biological process: metabolic process (GO:0008152);; biological process: cellular process (GO:0009987);; molecular function: binding (GO:0005488)	K08794|2.6191e-51|ame:727249|CaMKI, GB15096; calcium/calmodulin-dependent protein kinase I; K08794 calcium/calmodulin-dependent protein kinase I [EC:2.7.11.17] (A)	--
c45142.graph_c0	0.098974	-0.526157	normal	1.01712e-07	-1.151	down	0.0291788	-0.620769	normal	gi|403361812|gb|EJY80615.1|	Protein kinase domain containing protein [Oxytricha trifallax]	Probable serine/threonine-protein kinase nek3 GN=nek3 OS=Dictyostelium discoideum (Slime mold) PE=3 SV=1	General function prediction only	Molecular Function: protein serine/threonine kinase activity (GO:0004674);; Molecular Function: ATP binding (GO:0005524);; Biological Process: protein phosphorylation (GO:0006468);; Molecular Function: transferase activity, transferring glycosyl groups (GO:0016757);;	molecular function: catalytic activity (GO:0003824);; biological process: metabolic process (GO:0008152);; biological process: cellular process (GO:0009987);; molecular function: binding (GO:0005488)	--	--
c26950.graph_c0	0.71377	0.276675	normal	0.000810552	1.25223	up	0.0492318	0.978342	normal	gi|403333670|gb|EJY65950.1|	Protein kinase, putative [Oxytricha trifallax]	Protein kinase C GN=PKC1 OS=Lytechinus pictus (Painted sea urchin) PE=2 SV=1	Cell cycle control, cell division, chromosome partitioning	Molecular Function: protein serine/threonine kinase activity (GO:0004674);; Molecular Function: ATP binding (GO:0005524);; Biological Process: protein phosphorylation (GO:0006468);; Molecular Function: metal ion binding (GO:0046872);;	molecular function: catalytic activity (GO:0003824);; biological process: metabolic process (GO:0008152);; biological process: cellular process (GO:0009987);; molecular function: binding (GO:0005488)	K11481|4.58222e-24|ame:412271|Stk6, GB14418; serine/threonine protein kinase 6; K11481 aurora kinase A [EC:2.7.11.1] (A)	--
c37201.graph_c0	--	--	--	1.87269e-05	2.31237	up	0.0439627	2.05037	normal	gi|470493956|ref|XP_004346574.1|	protein serine/threonine kinase, putative [Acanthamoeba castellanii str. Neff]	Serine/threonine-protein kinase 4 homolog A GN=krsA OS=Dictyostelium discoideum (Slime mold) PE=1 SV=1	Signal transduction mechanisms	Molecular Function: protein serine/threonine kinase activity (GO:0004674);; Molecular Function: ATP binding (GO:0005524);; Biological Process: protein phosphorylation (GO:0006468);; Biological Process: signal transduction (GO:0007165);; Biological Process: determination of adult lifespan (GO:0008340);; Biological Process: positive regulation of locomotion (GO:0040017);; Biological Process: muscle…	molecular function: catalytic activity (GO:0003824);; biological process: metabolic process (GO:0008152);; biological process: cellular process (GO:0009987);; molecular function: binding (GO:0005488);; biological process: signaling (GO:0023052);; biological process: single-organism process (GO:0044699);; biological process: response to stimulus (GO:0050896);; biological process: biological regula…	K04411|8.49958e-120|amj:102569590|STK4; serine/threonine kinase 4; K04411 serine/threonine kinase 4 (A)	MAPK signaling pathway (ko04010);; FoxO signaling pathway (ko04068)
c27293.graph_c0	0.00212928	-1.05387	down	3.75483e-07	-1.1965	down	0.732457	-0.141105	normal	gi|145551749|ref|XP_001461551.1|	hypothetical protein [Paramecium tetraurelia strain d4-2]	Probable serine/threonine-protein kinase nek2 GN=nek2 OS=Dictyostelium discoideum (Slime mold) PE=1 SV=1	General function prediction only	Molecular Function: protein serine/threonine kinase activity (GO:0004674);; Molecular Function: ATP binding (GO:0005524);; Biological Process: protein phosphorylation (GO:0006468);;	molecular function: catalytic activity (GO:0003824);; biological process: metabolic process (GO:0008152);; biological process: cellular process (GO:0009987);; molecular function: binding (GO:0005488)	K08857|3.97367e-60|tad:TRIADDRAFT_25231|hypothetical protein; K08857 NIMA (never in mitosis gene a)-related kinase [EC:2.7.11.1] (A)	--
c49377.graph_c0	0.0536006	-1.19151	normal	0.00294725	-1.43954	down	--	--	--	gi|586729884|gb|EAR83720.2|	plant dual-specificity MAP kinase kinase family domain protein [Tetrahymena thermophila SB210]	Probable serine/threonine-protein kinase nek1 GN=nek1 OS=Dictyostelium discoideum (Slime mold) PE=3 SV=1	General function prediction only	Molecular Function: protein serine/threonine kinase activity (GO:0004674);; Molecular Function: ATP binding (GO:0005524);; Biological Process: protein phosphorylation (GO:0006468);;	molecular function: catalytic activity (GO:0003824);; biological process: metabolic process (GO:0008152);; biological process: cellular process (GO:0009987);; molecular function: binding (GO:0005488)	K08857|1.78966e-33|dre:556002|nek1, si:dkey-15j16.5, si:dkey-171k19.5, wu:fc38c08; NIMA (never in mitosis gene a)-related kinase 1; K08857 NIMA (never in mitosis gene a)-related kinase [EC:2.7.11.1] (A)	--
c54489.graph_c0	0.988579	0.0123414	normal	2.91341e-06	1.12647	up	8.60145e-06	1.11639	up	gi|678331616|emb|CDW78513.1|	protein kinase domain protein [Stylonychia lemnae]	Probable serine/threonine-protein kinase PLK GN=PLK OS=Dictyostelium discoideum (Slime mold) PE=3 SV=1	Cell cycle control, cell division, chromosome partitioning	Molecular Function: protein serine/threonine kinase activity (GO:0004674);; Molecular Function: ATP binding (GO:0005524);; Biological Process: protein phosphorylation (GO:0006468);;	molecular function: catalytic activity (GO:0003824);; biological process: metabolic process (GO:0008152);; biological process: cellular process (GO:0009987);; molecular function: binding (GO:0005488)	K06631|5.77308e-68|amj:102561861|PLK1; polo-like kinase 1; K06631 polo-like kinase 1 [EC:2.7.11.21] (A)	FoxO signaling pathway (ko04068);; Cell cycle (ko04110);; Oocyte meiosis (ko04114);; Progesterone-mediated oocyte maturation (ko04914)
c46777.graph_c0	0.252369	-0.36313	normal	3.88762e-11	-1.39806	down	3.22898e-05	-1.03107	down	gi|403368339|gb|EJY83999.1|	Protein kinase domain containing protein [Oxytricha trifallax]	Probable serine/threonine-protein kinase nek2 GN=nek2 OS=Dictyostelium discoideum (Slime mold) PE=1 SV=1	General function prediction only	Molecular Function: protein serine/threonine kinase activity (GO:0004674);; Biological Process: phosphorylation (GO:0016310);; Molecular Function: hydrolase activity (GO:0016787);;	molecular function: catalytic activity (GO:0003824);; biological process: metabolic process (GO:0008152);; biological process: cellular process (GO:0009987)	K08857|1.10345e-68|tad:TRIADDRAFT_25231|hypothetical protein; K08857 NIMA (never in mitosis gene a)-related kinase [EC:2.7.11.1] (A)	--
c32735.graph_c0	0.0580694	-0.715708	normal	0.254047	0.349217	normal	0.00318681	1.06712	up	gi|678341134|emb|CDW73592.1|	map kinase [Stylonychia lemnae]	Probable serine/threonine-protein kinase DDB_G0268078 GN=DDB_G0268078 OS=Dictyostelium discoideum (Slime mold) PE=3 SV=1	Signal transduction mechanisms	Molecular Function: protein serine/threonine kinase activity (GO:0004674);; Biological Process: phosphorylation (GO:0016310);;	molecular function: catalytic activity (GO:0003824);; biological process: metabolic process (GO:0008152);; biological process: cellular process (GO:0009987)	K08828|8.05726e-50|mmu:56542|Ick, 2210420N10Rik, AI848300, Mrk; intestinal cell kinase (EC:2.7.11.22); K08828 intestinal cell (MAK-like) kinase [EC:2.7.11.22] (A)	--
c51604.graph_c0	4.8158e-05	-1.22795	down	1.26661e-18	-1.98949	down	0.00830908	-0.759384	normal	gi|672252014|gb|KFG28689.1|	protein kinase G AGC kinase family member PKG, partial [Toxoplasma gondii p89]	cGMP-dependent protein kinase, isozyme 2 forms cD5/T2 GN=for OS=Drosophila melanogaster (Fruit fly) PE=2 SV=3	Signal transduction mechanisms	Molecular Function: protein serine/threonine kinase activity (GO:0004674);; Biological Process: phosphorylation (GO:0016310);;	molecular function: catalytic activity (GO:0003824);; biological process: metabolic process (GO:0008152);; biological process: cellular process (GO:0009987)	K07376|4.934e-64|tad:TRIADDRAFT_30166|hypothetical protein; K07376 protein kinase, cGMP-dependent [EC:2.7.11.12] (A)	--
c19962.graph_c0	0.0106092	-0.809828	normal	1.92282e-05	-1.14077	down	0.388259	-0.326018	normal	gi|678317487|emb|CDW85769.1|	protein kinase domain containing protein [Stylonychia lemnae]	Protein kinase C, eye isozyme GN=inaC OS=Drosophila melanogaster (Fruit fly) PE=1 SV=1	Signal transduction mechanisms	Molecular Function: protein kinase C activity (GO:0004697);; Molecular Function: ATP binding (GO:0005524);; Biological Process: protein phosphorylation (GO:0006468);;	molecular function: catalytic activity (GO:0003824);; biological process: metabolic process (GO:0008152);; biological process: cellular process (GO:0009987);; molecular function: binding (GO:0005488)	K04445|3.78888e-07|nve:NEMVE_v1g111564|hypothetical protein; K04445 ribosomal protein S6 kinase alpha-5 [EC:2.7.11.1] (A)	--
c19962.graph_c1	0.0129272	-0.902137	normal	2.51381e-07	-1.40667	down	0.284332	-0.499757	normal	gi|678329223|emb|CDW79755.1|	protein kinase domain containing protein [Stylonychia lemnae]	Probable serine/threonine-protein kinase DDB_G0277449 GN=DDB_G0277449 OS=Dictyostelium discoideum (Slime mold) PE=3 SV=1	--	Molecular Function: protein kinase C activity (GO:0004697);; Molecular Function: ATP binding (GO:0005524);; Biological Process: protein phosphorylation (GO:0006468);;	molecular function: catalytic activity (GO:0003824);; biological process: metabolic process (GO:0008152);; biological process: cellular process (GO:0009987);; molecular function: binding (GO:0005488)	K13302|5.20775e-43|cbr:CBG16386|Cbr-sgk-1; C. briggsae CBR-SGK-1 protein; K13302 serum/glucocorticoid-regulated kinase 1 [EC:2.7.11.1] (A)	FoxO signaling pathway (ko04068)
c48719.graph_c0	4.0231e-05	-1.15518	down	0.000307976	0.841691	normal	1.08635e-14	2.00218	up	gi|678307619|emb|CDW90834.1|	turgor pressure sensor [Stylonychia lemnae]	Putative aldehyde dehydrogenase family 7 member A1 homolog GN=DDB_G0276821 OS=Dictyostelium discoideum (Slime mold) PE=3 SV=2	Energy production and conversion	Molecular Function: protein kinase activity (GO:0004672);; Molecular Function: oxidoreductase activity, acting on the aldehyde or oxo group of donors, NAD or NADP as acceptor (GO:0016620);; Biological Process: oxidation-reduction process (GO:0055114);;	molecular function: catalytic activity (GO:0003824);; biological process: metabolic process (GO:0008152);; biological process: cellular process (GO:0009987);; biological process: single-organism process (GO:0044699)	K14085|0|hmg:100198995|aldh7a1; aldehyde dehydrogenase 7 family, member A1; K14085 aldehyde dehydrogenase family 7 member A1 [EC:1.2.1.31 1.2.1.8 1.2.1.3] (A)	Glycolysis / Gluconeogenesis (ko00010);; Ascorbate and aldarate metabolism (ko00053);; Fatty acid degradation (ko00071);; Glycine, serine and threonine metabolism (ko00260);; Valine, leucine and isoleucine degradation (ko00280);; Lysine biosynthesis (ko00300);; Lysine degradation (ko00310);; Arginine and proline metabolism (ko00330);; Histidine metabolism (ko00340);; Tryptophan metabolism (ko0038…
c21589.graph_c0	0.235605	-0.495891	normal	5.58979e-05	-1.02483	down	0.12164	-0.526316	normal	gi|403336235|gb|EJY67306.1|	Protein kinase domain containing protein [Oxytricha trifallax]	Calcium-dependent protein kinase 4 GN=CPK4 OS=Plasmodium falciparum (isolate 3D7) PE=1 SV=3	Signal transduction mechanisms	Molecular Function: protein kinase activity (GO:0004672);; Molecular Function: ion binding (GO:0043167);;	molecular function: catalytic activity (GO:0003824);; biological process: metabolic process (GO:0008152);; biological process: cellular process (GO:0009987);; molecular function: binding (GO:0005488)	K13412|3.44437e-64|mcc:100425952|calcium-dependent protein kinase 2-like; K13412 calcium-dependent protein kinase [EC:2.7.11.1] (A)	Toxoplasmosis (ko05145)
c28351.graph_c0	0.753073	-0.152725	normal	6.54739e-15	-2.66263	down	7.92351e-10	-2.50504	down	gi|678335166|emb|CDW76675.1|	calcium-dependent protein [Stylonychia lemnae]	Calcium-dependent protein kinase 2 GN=CPK2 OS=Plasmodium falciparum (isolate K1 / Thailand) PE=1 SV=3	Signal transduction mechanisms	Molecular Function: protein kinase activity (GO:0004672);; Molecular Function: ion binding (GO:0043167);;	molecular function: catalytic activity (GO:0003824);; biological process: metabolic process (GO:0008152);; biological process: cellular process (GO:0009987);; molecular function: binding (GO:0005488)	K13412|9.0664e-55|mcc:100425952|calcium-dependent protein kinase 2-like; K13412 calcium-dependent protein kinase [EC:2.7.11.1] (A)	Toxoplasmosis (ko05145)
c18916.graph_c0	0.837955	-0.0937683	normal	4.72637e-08	-1.36786	down	4.26101e-05	-1.27085	down	gi|83595263|gb|ABC25083.1|	calcium/ calmodulin-dependent protein kinase 1 [Glossina morsitans morsitans]	5&apos;-AMP-activated protein kinase catalytic subunit alpha-1 GN=aak-1 OS=Caenorhabditis elegans PE=2 SV=2	Signal transduction mechanisms	Molecular Function: protein kinase activity (GO:0004672);; Molecular Function: binding (GO:0005488);; Biological Process: metabolic process (GO:0008152);;	molecular function: catalytic activity (GO:0003824);; biological process: metabolic process (GO:0008152);; biological process: cellular process (GO:0009987);; molecular function: binding (GO:0005488)	K08803|3.86806e-24|xla:446562|dapk1-a, dapk, dapk1; death-associated protein kinase 1 (EC:2.7.1.-); K08803 death-associated protein kinase [EC:2.7.11.1] (A)	--
c36025.graph_c0	0.00941451	-1.08161	down	0.00404998	0.802452	normal	2.67007e-07	1.89064	up	gi|678340285|emb|CDW74018.1|	UNKNOWN [Stylonychia lemnae]	Myosin light chain kinase A GN=mlkA OS=Dictyostelium discoideum (Slime mold) PE=1 SV=2	Signal transduction mechanisms	Molecular Function: protein kinase activity (GO:0004672);; Molecular Function: binding (GO:0005488);; Biological Process: metabolic process (GO:0008152);;	molecular function: catalytic activity (GO:0003824);; biological process: metabolic process (GO:0008152);; biological process: cellular process (GO:0009987);; molecular function: binding (GO:0005488)	K08794|7.19411e-56|aqu:100635387|calcium/calmodulin-dependent protein kinase type 1D-like; K08794 calcium/calmodulin-dependent protein kinase I [EC:2.7.11.17] (A)	--
c19825.graph_c0	4.82283e-06	-1.27743	down	0.134524	-0.387194	normal	0.00201535	0.894278	normal	gi|403371145|gb|EJY85454.1|	Protein kinase 2 [Oxytricha trifallax]	RAC family serine/threonine-protein kinase homolog GN=pkbA OS=Dictyostelium discoideum (Slime mold) PE=1 SV=1	--	Molecular Function: protein kinase activity (GO:0004672);; Molecular Function: binding (GO:0005488);;	molecular function: catalytic activity (GO:0003824);; biological process: metabolic process (GO:0008152);; biological process: cellular process (GO:0009987);; molecular function: binding (GO:0005488)	K04456|3.02746e-89|spu:582192|RAC-gamma serine/threonine-protein kinase-like; K04456 RAC serine/threonine-protein kinase [EC:2.7.11.1] (A)	FoxO signaling pathway (ko04068);; mTOR signaling pathway (ko04150);; Jak-STAT signaling pathway (ko04630)
c46150.graph_c0	0.129495	0.57509	normal	5.37983e-06	1.20235	up	0.0556176	0.629709	normal	gi|403352243|gb|EJY75627.1|	Putative calcium-dependent protein kinase [Oxytricha trifallax]	Calcium-dependent protein kinase 2 GN=CPK2 OS=Plasmodium falciparum (isolate K1 / Thailand) PE=1 SV=3	Signal transduction mechanisms	Molecular Function: protein kinase activity (GO:0004672);; Molecular Function: binding (GO:0005488);;	molecular function: catalytic activity (GO:0003824);; biological process: metabolic process (GO:0008152);; biological process: cellular process (GO:0009987);; molecular function: binding (GO:0005488)	K08794|3.6596e-61|cbr:CBG08406|Cbr-cmk-1; C. briggsae CBR-CMK-1 protein; K08794 calcium/calmodulin-dependent protein kinase I [EC:2.7.11.17] (A)	--
c46814.graph_c0	2.816e-07	2.19702	up	0.0864038	0.579746	normal	0.000141075	-1.61121	down	gi|294909493|ref|XP_002777779.1|	Calcium-dependent protein kinase, putative [Perkinsus marinus ATCC 50983]	Calcium-dependent protein kinase 2 GN=CPK2 OS=Plasmodium falciparum (isolate K1 / Thailand) PE=1 SV=3	Signal transduction mechanisms	Molecular Function: protein kinase activity (GO:0004672);; Molecular Function: binding (GO:0005488);;	molecular function: catalytic activity (GO:0003824);; biological process: metabolic process (GO:0008152);; biological process: cellular process (GO:0009987);; molecular function: binding (GO:0005488)	K13412|5.54871e-37|mcc:100425952|calcium-dependent protein kinase 2-like; K13412 calcium-dependent protein kinase [EC:2.7.11.1] (A)	Toxoplasmosis (ko05145)
c49822.graph_c0	5.95175e-06	-1.31955	down	2.0207e-06	-1.17328	down	0.700888	0.146902	normal	gi|678330554|emb|CDW79074.1|	camp-dependent protein kinase catalytic [Stylonychia lemnae]	Serine/threonine-protein kinase sgk-1 {ECO:0000250|UniProtKB:Q2PJ68} GN=sgk-1 OS=Caenorhabditis briggsae PE=3 SV=3	--	Molecular Function: protein kinase activity (GO:0004672);; Molecular Function: binding (GO:0005488);;	molecular function: catalytic activity (GO:0003824);; biological process: metabolic process (GO:0008152);; biological process: cellular process (GO:0009987);; molecular function: binding (GO:0005488)	K13303|1.02899e-70|hgl:101717022|Sgk2; serum/glucocorticoid regulated kinase 2; K13303 serum/glucocorticoid-regulated kinase 2 [EC:2.7.11.1] (A)	FoxO signaling pathway (ko04068);; PI3K-Akt signaling pathway (ko04151)
c33024.graph_c0	0.909723	0.148492	normal	0.00922556	1.33446	up	0.0540316	1.19237	normal	gi|380254596|gb|AFD36233.1|	protein kinase C4, partial [Acanthamoeba castellanii]	Probable myosin light chain kinase DDB_G0275057 GN=DDB_G0275057 OS=Dictyostelium discoideum (Slime mold) PE=3 SV=1	Signal transduction mechanisms	Molecular Function: protein kinase activity (GO:0004672);; Molecular Function: ATP binding (GO:0005524);; Biological Process: protein phosphorylation (GO:0006468);; Cellular Component: plastid (GO:0009536);;	molecular function: catalytic activity (GO:0003824);; biological process: metabolic process (GO:0008152);; biological process: cellular process (GO:0009987);; molecular function: binding (GO:0005488);; cellular component: cell (GO:0005623);; cellular component: organelle (GO:0043226);; cellular component: cell part (GO:0044464)	K08795|5.7e-86|ocu:100356509|PNCK; pregnancy up-regulated nonubiquitous CaM kinase; K08795 pregnancy upregulated non-ubiquitously expressed CaM kinase [EC:2.7.11.17] (A)	--
c19612.graph_c0	0.0226186	-0.740039	normal	8.70861e-08	-1.27577	down	0.114751	-0.534213	normal	gi|403376884|gb|EJY88428.1|	Protein kinase domain containing protein [Oxytricha trifallax]	Calcium-dependent protein kinase 2 GN=CPK2 OS=Plasmodium falciparum (isolate K1 / Thailand) PE=1 SV=3	Signal transduction mechanisms	Molecular Function: protein kinase activity (GO:0004672);; Biological Process: metabolic process (GO:0008152);; Molecular Function: ion binding (GO:0043167);;	molecular function: catalytic activity (GO:0003824);; biological process: metabolic process (GO:0008152);; biological process: cellular process (GO:0009987);; molecular function: binding (GO:0005488)	K13412|3.1585e-52|mcc:100425952|calcium-dependent protein kinase 2-like; K13412 calcium-dependent protein kinase [EC:2.7.11.1] (A)	Toxoplasmosis (ko05145)
c52462.graph_c0	0.339191	-0.328662	normal	5.02148e-08	-1.40399	down	0.000729529	-1.07031	down	gi|403374494|gb|EJY87202.1|	Calcium-dependent protein kinase, putative [Oxytricha trifallax]	Calcium-dependent protein kinase 2 GN=CPK2 OS=Plasmodium falciparum (isolate K1 / Thailand) PE=1 SV=3	Signal transduction mechanisms	Molecular Function: protein kinase activity (GO:0004672);; Biological Process: metabolic process (GO:0008152);; Molecular Function: ion binding (GO:0043167);;	molecular function: catalytic activity (GO:0003824);; biological process: metabolic process (GO:0008152);; biological process: cellular process (GO:0009987);; molecular function: binding (GO:0005488)	K13412|1.17021e-64|mcc:100425952|calcium-dependent protein kinase 2-like; K13412 calcium-dependent protein kinase [EC:2.7.11.1] (A)	Toxoplasmosis (ko05145)
c52623.graph_c0	0.0036425	-0.866209	normal	1.59782e-28	-2.84395	down	4.15886e-12	-1.97772	down	gi|403374494|gb|EJY87202.1|	Calcium-dependent protein kinase, putative [Oxytricha trifallax]	Calcium-dependent protein kinase 2 GN=CPK2 OS=Plasmodium falciparum (isolate K1 / Thailand) PE=1 SV=3	Signal transduction mechanisms	Molecular Function: protein kinase activity (GO:0004672);; Biological Process: metabolic process (GO:0008152);; Molecular Function: ion binding (GO:0043167);;	molecular function: catalytic activity (GO:0003824);; biological process: metabolic process (GO:0008152);; biological process: cellular process (GO:0009987);; molecular function: binding (GO:0005488)	K13412|4.46028e-68|mcc:100425952|calcium-dependent protein kinase 2-like; K13412 calcium-dependent protein kinase [EC:2.7.11.1] (A)	Toxoplasmosis (ko05145)
c39140.graph_c0	0.0372542	-0.60429	normal	1.02868e-10	-1.50239	down	0.00123426	-0.895397	normal	gi|403332715|gb|EJY65396.1|	Serine/threonine protein kinase [Oxytricha trifallax]	Probable serine/threonine-protein kinase fhkC GN=fhkC OS=Dictyostelium discoideum (Slime mold) PE=3 SV=2	General function prediction only	Molecular Function: protein kinase activity (GO:0004672);; Biological Process: metabolic process (GO:0008152);; Biological Process: cellular process (GO:0009987);;	molecular function: catalytic activity (GO:0003824);; biological process: metabolic process (GO:0008152);; biological process: cellular process (GO:0009987)	K08800|6.01654e-43|lcm:102362402|NUAK1; NUAK family, SNF1-like kinase, 1; K08800 NUAK family, SNF1-like kinase [EC:2.7.11.1] (A)	--
c28183.graph_c0	0.496593	-0.519859	normal	0.000493702	-1.72734	down	--	--	--	gi|403359770|gb|EJY79543.1|	Protein kinase domain containing protein [Oxytricha trifallax]	Protein kinase 3 GN=pkgC OS=Dictyostelium discoideum (Slime mold) PE=3 SV=2	Signal transduction mechanisms	Molecular Function: protein kinase activity (GO:0004672);; Biological Process: metabolic process (GO:0008152);;	molecular function: catalytic activity (GO:0003824);; biological process: metabolic process (GO:0008152);; biological process: cellular process (GO:0009987)	K04456|2.75182e-26|phu:Phum_PHUM299490|RAC protein kinase DRAC-PK85, putative (EC:2.7.11.13); K04456 RAC serine/threonine-protein kinase [EC:2.7.11.1] (A)	FoxO signaling pathway (ko04068);; mTOR signaling pathway (ko04150);; Jak-STAT signaling pathway (ko04630)
c19067.graph_c0	0.00143521	-0.955629	normal	3.66962e-07	-1.11782	down	0.666488	-0.160131	normal	gi|678327242|emb|CDW80764.1|	serine threonine protein kinase [Stylonychia lemnae]	Probable serine/threonine-protein kinase nek1 GN=nek1 OS=Dictyostelium discoideum (Slime mold) PE=3 SV=1	General function prediction only	Molecular Function: protein kinase activity (GO:0004672);; Biological Process: cellular process (GO:0009987);;	molecular function: catalytic activity (GO:0003824);; biological process: metabolic process (GO:0008152);; biological process: cellular process (GO:0009987)	K08857|7.64861e-36|hro:HELRODRAFT_150398|hypothetical protein; K08857 NIMA (never in mitosis gene a)-related kinase [EC:2.7.11.1] (A)	--
c20202.graph_c0	0.000226821	-1.22337	down	0.000647889	-1.01988	down	0.704626	0.204359	normal	gi|403357203|gb|EJY78223.1|	Protein kinase domain containing protein [Oxytricha trifallax]	Extracellular signal-regulated kinase 1 GN=erkA OS=Dictyostelium discoideum (Slime mold) PE=2 SV=2	Signal transduction mechanisms	Molecular Function: protein kinase activity (GO:0004672);; Biological Process: cellular process (GO:0009987);;	molecular function: catalytic activity (GO:0003824);; biological process: metabolic process (GO:0008152);; biological process: cellular process (GO:0009987)	K04371|5.04037e-32|cmy:102932555|MAPK3; mitogen-activated protein kinase 3; K04371 mitogen-activated protein kinase 1/3 [EC:2.7.11.24] (A)	MAPK signaling pathway (ko04010);; ErbB signaling pathway (ko04012);; FoxO signaling pathway (ko04068);; Oocyte meiosis (ko04114);; mTOR signaling pathway (ko04150);; Adrenergic signaling in cardiomyocytes (ko04261);; Vascular smooth muscle contraction (ko04270);; Dorso-ventral axis formation (ko04320);; TGF-beta signaling pathway (ko04350);; VEGF signaling pathway (ko04370);; Focal adhesion (ko0…
c43047.graph_c0	0.0347867	-0.650073	normal	5.12739e-41	-2.8237	down	1.34691e-18	-2.17131	down	gi|403344850|gb|EJY71774.1|	Sporangia induced mitogenactivated protein kinase pu [Oxytricha trifallax]	Mitogen-activated protein kinase ERK-A GN=rl OS=Drosophila melanogaster (Fruit fly) PE=1 SV=3	Signal transduction mechanisms	Molecular Function: protein kinase activity (GO:0004672);; Biological Process: cellular process (GO:0009987);;	molecular function: catalytic activity (GO:0003824);; biological process: metabolic process (GO:0008152);; biological process: cellular process (GO:0009987)	K04371|4.30395e-100|tru:101066563|mitogen-activated protein kinase 1-like; K04371 mitogen-activated protein kinase 1/3 [EC:2.7.11.24] (A)	MAPK signaling pathway (ko04010);; ErbB signaling pathway (ko04012);; FoxO signaling pathway (ko04068);; Oocyte meiosis (ko04114);; mTOR signaling pathway (ko04150);; Adrenergic signaling in cardiomyocytes (ko04261);; Vascular smooth muscle contraction (ko04270);; Dorso-ventral axis formation (ko04320);; TGF-beta signaling pathway (ko04350);; VEGF signaling pathway (ko04370);; Focal adhesion (ko0…
c43121.graph_c0	1.56658e-22	-2.46895	down	1.26031e-13	-1.7923	down	0.057301	0.683109	normal	gi|403347840|gb|EJY73353.1|	Protein kinase domain containing protein [Oxytricha trifallax]	Cell division control protein 2 homolog 3 GN=CRK3 OS=Trypanosoma brucei brucei PE=3 SV=1	General function prediction only	Molecular Function: protein kinase activity (GO:0004672);; Biological Process: cellular process (GO:0009987);;	molecular function: catalytic activity (GO:0003824);; biological process: metabolic process (GO:0008152);; biological process: cellular process (GO:0009987)	K02206|4.98898e-90|hmg:100212745|cyclin-dependent kinase 2-like; K02206 cyclin-dependent kinase 2 [EC:2.7.11.22] (A)	FoxO signaling pathway (ko04068)
c44514.graph_c0	0.0285557	-0.640843	normal	2.98616e-07	-1.10178	down	0.0851347	-0.457077	normal	gi|403367078|gb|EJY83348.1|	MAPK-related kinase [Oxytricha trifallax]	Mitogen-activated protein kinase mpk-1 GN=mpk-1 OS=Caenorhabditis elegans PE=1 SV=2	Signal transduction mechanisms	Molecular Function: protein kinase activity (GO:0004672);; Biological Process: cellular process (GO:0009987);;	molecular function: catalytic activity (GO:0003824);; biological process: metabolic process (GO:0008152);; biological process: cellular process (GO:0009987)	K04371|1.50563e-32|cmy:102932555|MAPK3; mitogen-activated protein kinase 3; K04371 mitogen-activated protein kinase 1/3 [EC:2.7.11.24] (A)	MAPK signaling pathway (ko04010);; ErbB signaling pathway (ko04012);; FoxO signaling pathway (ko04068);; Oocyte meiosis (ko04114);; mTOR signaling pathway (ko04150);; Adrenergic signaling in cardiomyocytes (ko04261);; Vascular smooth muscle contraction (ko04270);; Dorso-ventral axis formation (ko04320);; TGF-beta signaling pathway (ko04350);; VEGF signaling pathway (ko04370);; Focal adhesion (ko0…
c45964.graph_c0	0.407881	0.40593	normal	3.58442e-07	1.55293	up	0.00162213	1.15413	up	gi|123496113|ref|XP_001326893.1|	CAMK family protein kinase [Trichomonas vaginalis G3]	Probable serine/threonine-protein kinase nek3 GN=nek3 OS=Dictyostelium discoideum (Slime mold) PE=3 SV=1	General function prediction only	Molecular Function: protein kinase activity (GO:0004672);; Biological Process: cellular process (GO:0009987);;	molecular function: catalytic activity (GO:0003824);; biological process: metabolic process (GO:0008152);; biological process: cellular process (GO:0009987)	K08857|5.18392e-37|lgi:LOTGIDRAFT_108248|hypothetical protein; K08857 NIMA (never in mitosis gene a)-related kinase [EC:2.7.11.1] (A)	--
c47932.graph_c0	0.000542638	-1.15834	down	0.945865	-0.0281065	normal	0.000169093	1.13589	up	gi|678310679|emb|CDW89248.1|	protein kinase domain containing protein [Stylonychia lemnae]	Cell division control protein 2 homolog 3 GN=CRK3 OS=Trypanosoma brucei brucei PE=3 SV=1	General function prediction only	Molecular Function: protein kinase activity (GO:0004672);; Biological Process: cellular process (GO:0009987);;	molecular function: catalytic activity (GO:0003824);; biological process: metabolic process (GO:0008152);; biological process: cellular process (GO:0009987)	K02087|3.90562e-97|cin:101243133|cyclin-dependent kinase 1-like; K02087 cyclin-dependent kinase 1 [EC:2.7.11.22 2.7.11.23] (A)	--
c45318.graph_c0	0.000151516	-1.04701	down	0.000278412	-0.80583	normal	0.440613	0.243718	normal	gi|403374229|gb|EJY87054.1|	Protein kinase domain containing protein [Oxytricha trifallax]	Probable serine/threonine-protein kinase nek3 GN=nek3 OS=Dictyostelium discoideum (Slime mold) PE=3 SV=1	General function prediction only	Molecular Function: protein kinase activity (GO:0004672);; Biological Process: cellular metabolic process (GO:0044237);; Biological Process: regulation of cellular process (GO:0050794);;	molecular function: catalytic activity (GO:0003824);; biological process: metabolic process (GO:0008152);; biological process: cellular process (GO:0009987);; biological process: biological regulation (GO:0065007)	K08857|1.36565e-52|hro:HELRODRAFT_150398|hypothetical protein; K08857 NIMA (never in mitosis gene a)-related kinase [EC:2.7.11.1] (A)	--
c20543.graph_c0	0.20387	0.441093	normal	8.05509e-14	1.84226	up	2.54612e-07	1.40385	up	gi|123438280|ref|XP_001309926.1|	CAMK family protein kinase [Trichomonas vaginalis G3]	Ovarian-specific serine/threonine-protein kinase Lok GN=lok OS=Drosophila melanogaster (Fruit fly) PE=2 SV=1	Cell cycle control, cell division, chromosome partitioning	Molecular Function: protein kinase activity (GO:0004672);; Biological Process: apoptotic process (GO:0006915);; Biological Process: cellular response to DNA damage stimulus (GO:0006974);; Biological Process: cellular metabolic process (GO:0044237);; Biological Process: regulation of cellular process (GO:0050794);;	molecular function: catalytic activity (GO:0003824);; biological process: metabolic process (GO:0008152);; biological process: cellular process (GO:0009987);; biological process: single-organism process (GO:0044699);; biological process: response to stimulus (GO:0050896);; biological process: biological regulation (GO:0065007)	K06641|8.02111e-11|dwi:Dwil_GK18729|GK18729 gene product from transcript GK18729-RA; K06641 serine/threonine-protein kinase Chk2 [EC:2.7.11.1] (A)	--
c53723.graph_c0	0.689069	-0.153984	normal	2.72731e-30	-2.56206	down	1.57642e-21	-2.40438	down	gi|146163023|ref|XP_001010650.2|	Transketolase, pyridine binding domain containing protein [Tetrahymena thermophila]	Transketolase GN=tkt-2 OS=Dictyostelium discoideum (Slime mold) PE=1 SV=1	Carbohydrate transport and metabolism	Molecular Function: protein kinase activity (GO:0004672);;	molecular function: catalytic activity (GO:0003824);; biological process: metabolic process (GO:0008152);; biological process: cellular process (GO:0009987)	K00615|0|mcf:102136564|TKT; transketolase; K00615 transketolase [EC:2.2.1.1] (A)	Pentose phosphate pathway (ko00030);; Carbon metabolism (ko01200);; Biosynthesis of amino acids (ko01230)
c54689.graph_c0	0.143551	-0.59305	normal	5.11582e-05	1.03978	up	1.89606e-08	1.63548	up	gi|146163023|ref|XP_001010650.2|	Transketolase, pyridine binding domain containing protein [Tetrahymena thermophila]	Transketolase GN=tkt-2 OS=Dictyostelium discoideum (Slime mold) PE=1 SV=1	Carbohydrate transport and metabolism	Molecular Function: protein kinase activity (GO:0004672);;	molecular function: catalytic activity (GO:0003824);; biological process: metabolic process (GO:0008152);; biological process: cellular process (GO:0009987)	K00615|0|shr:100921816|transketolase-like protein 2-like; K00615 transketolase [EC:2.2.1.1] (A)	Pentose phosphate pathway (ko00030);; Carbon metabolism (ko01200);; Biosynthesis of amino acids (ko01230)
c19061.graph_c0	0.0891148	-0.564064	normal	2.21124e-05	1.0375	up	1.78748e-09	1.60688	up	gi|678337435|emb|CDW75477.1|	UNKNOWN [Stylonychia lemnae]	Ataxin-3 homolog GN=atx-3 OS=Caenorhabditis elegans PE=1 SV=1	General function prediction only	Molecular Function: protein kinase activity (GO:0004672);;	molecular function: catalytic activity (GO:0003824);; biological process: metabolic process (GO:0008152);; biological process: cellular process (GO:0009987)	K11863|1.73308e-27|cmk:103185389|atxn3, ataxin-3; ataxin 3; K11863 Ataxin-3 [EC:3.4.22.-] (A)	Protein processing in endoplasmic reticulum (ko04141)
c19767.graph_c0	7.65097e-19	-2.63585	down	0.103871	0.428236	normal	2.36515e-26	3.06845	up	gi|294715510|gb|ADF30846.1|	protein kinase domain-containing protein [Euplotes aediculatus]	cAMP-dependent protein kinase catalytic subunit GN=kin-1 OS=Caenorhabditis elegans PE=3 SV=3	Signal transduction mechanisms	Molecular Function: protein kinase activity (GO:0004672);;	molecular function: catalytic activity (GO:0003824);; biological process: metabolic process (GO:0008152);; biological process: cellular process (GO:0009987)	K04345|3.65409e-61|pps:100970917|PRKACB; protein kinase, cAMP-dependent, catalytic, beta; K04345 protein kinase A [EC:2.7.11.11] (A)	MAPK signaling pathway (ko04010);; Ras signaling pathway (ko04014);; Calcium signaling pathway (ko04020);; cAMP signaling pathway (ko04024);; Chemokine signaling pathway (ko04062);; Oocyte meiosis (ko04114);; Apoptosis (ko04210);; Adrenergic signaling in cardiomyocytes (ko04261);; Vascular smooth muscle contraction (ko04270);; Wnt signaling pathway (ko04310);; Hedgehog signaling pathway (ko04340)…
c24557.graph_c0	0.298176	0.369966	normal	8.02777e-05	-1.08755	down	1.3045e-07	-1.45439	down	gi|145553449|ref|XP_001462399.1|	hypothetical protein [Paramecium tetraurelia strain d4-2]	Serine/threonine-protein kinase sgk-1 {ECO:0000250|UniProtKB:O00141, ECO:0000303|PubMed:15068796} OS=Caenorhabditis elegans PE=1 SV=1	--	Molecular Function: protein kinase activity (GO:0004672);;	molecular function: catalytic activity (GO:0003824);; biological process: metabolic process (GO:0008152);; biological process: cellular process (GO:0009987)	K13302|3.08795e-51|cel:CELE_W10G6.2|sgk-1; Protein SGK-1, isoform A; K13302 serum/glucocorticoid-regulated kinase 1 [EC:2.7.11.1] (A)	FoxO signaling pathway (ko04068)
c24816.graph_c0	0.85725	0.131225	normal	1.0024e-05	1.41083	up	0.00141589	1.2836	up	gi|752874693|ref|XP_011254676.1|	PREDICTED: serine/threonine-protein kinase PLK4 isoform X1 [Camponotus floridanus]	Probable serine/threonine-protein kinase PLK GN=PLK OS=Dictyostelium discoideum (Slime mold) PE=3 SV=1	Cell cycle control, cell division, chromosome partitioning	Molecular Function: protein kinase activity (GO:0004672);;	molecular function: catalytic activity (GO:0003824);; biological process: metabolic process (GO:0008152);; biological process: cellular process (GO:0009987)	--	--
c25483.graph_c0	0.00453236	-0.987783	normal	0.815004	0.0948665	normal	0.00639445	1.07943	up	gi|678345558|emb|CDW71361.1|	agc pdk1 protein kinase [Stylonychia lemnae]	3-phosphoinositide-dependent protein kinase B GN=pdkB OS=Dictyostelium discoideum (Slime mold) PE=3 SV=1	Signal transduction mechanisms	Molecular Function: protein kinase activity (GO:0004672);;	molecular function: catalytic activity (GO:0003824);; biological process: metabolic process (GO:0008152);; biological process: cellular process (GO:0009987)	K06276|6.71289e-26|bmor:101746352|3-phosphoinositide-dependent protein kinase 1-like; K06276 3-phosphoinositide dependent protein kinase-1 [EC:2.7.11.1] (A)	FoxO signaling pathway (ko04068);; mTOR signaling pathway (ko04150)
c25603.graph_c0	0.175332	0.491168	normal	0.000257857	1.02807	up	0.128874	0.539969	normal	gi|145506068|ref|XP_001439000.1|	hypothetical protein [Paramecium tetraurelia strain d4-2]	Serine/threonine-protein kinase PLK4 GN=SAK OS=Drosophila mojavensis (Fruit fly) PE=3 SV=1	Cell cycle control, cell division, chromosome partitioning	Molecular Function: protein kinase activity (GO:0004672);;	molecular function: catalytic activity (GO:0003824);; biological process: metabolic process (GO:0008152);; biological process: cellular process (GO:0009987)	K08813|6.59112e-26|chx:102183618|STK33; serine/threonine kinase 33; K08813 serine/threonine kinase 33 [EC:2.7.11.1] (A)	--
c25826.graph_c0	0.0791333	-0.585852	normal	1.04319e-06	-1.05554	down	0.137808	-0.46727	normal	gi|403359770|gb|EJY79543.1|	Protein kinase domain containing protein [Oxytricha trifallax]	RAC serine/threonine-protein kinase GN=Akt1 OS=Drosophila melanogaster (Fruit fly) PE=1 SV=3	Signal transduction mechanisms	Molecular Function: protein kinase activity (GO:0004672);;	molecular function: catalytic activity (GO:0003824);; biological process: metabolic process (GO:0008152);; biological process: cellular process (GO:0009987)	K04456|5.42171e-83|spu:582897|RAC-gamma serine/threonine-protein kinase-like; K04456 RAC serine/threonine-protein kinase [EC:2.7.11.1] (A)	FoxO signaling pathway (ko04068);; mTOR signaling pathway (ko04150);; Jak-STAT signaling pathway (ko04630)
c26107.graph_c0	0.434958	-0.398696	normal	2.03727e-09	-2.48807	down	2.72711e-05	-2.0912	down	gi|403363199|gb|EJY81340.1|	Protein kinase 2 [Oxytricha trifallax]	Protein kinase 2 GN=pkgB OS=Dictyostelium discoideum (Slime mold) PE=1 SV=2	--	Molecular Function: protein kinase activity (GO:0004672);;	molecular function: catalytic activity (GO:0003824);; biological process: metabolic process (GO:0008152);; biological process: cellular process (GO:0009987)	K13304|5.2912e-69|phu:Phum_PHUM080450|eye-specific protein kinase C, putative (EC:2.7.11.13); K13304 serum/glucocorticoid-regulated kinase 3 [EC:2.7.11.1] (A)	FoxO signaling pathway (ko04068)
c27363.graph_c0	0.0552102	-0.629467	normal	1.66479e-07	-1.21737	down	0.0416572	-0.583361	normal	gi|145475315|ref|XP_001423680.1|	hypothetical protein [Paramecium tetraurelia strain d4-2]	5&apos;-AMP-activated protein kinase catalytic subunit alpha-2 GN=aak-2 OS=Caenorhabditis elegans PE=1 SV=2	Signal transduction mechanisms	Molecular Function: protein kinase activity (GO:0004672);;	molecular function: catalytic activity (GO:0003824);; biological process: metabolic process (GO:0008152);; biological process: cellular process (GO:0009987)	K16311|1.42929e-47|nve:NEMVE_v1g161733|hypothetical protein; K19009 serine/threonine-protein kinase SIK3 [EC:2.7.11.1] (A)	--
c32868.graph_c1	0.000323423	-1.01129	down	0.00595837	-0.692709	normal	0.333812	0.324093	normal	gi|403358012|gb|EJY78641.1|	Serine/threonine protein kinase [Oxytricha trifallax]	Probable serine/threonine-protein kinase DDB_G0277449 GN=DDB_G0277449 OS=Dictyostelium discoideum (Slime mold) PE=3 SV=1	Signal transduction mechanisms	Molecular Function: protein kinase activity (GO:0004672);;	molecular function: catalytic activity (GO:0003824);; biological process: metabolic process (GO:0008152);; biological process: cellular process (GO:0009987)	K04456|4.5394e-62|hro:HELRODRAFT_119785|hypothetical protein; K04456 RAC serine/threonine-protein kinase [EC:2.7.11.1] (A)	FoxO signaling pathway (ko04068);; mTOR signaling pathway (ko04150);; Jak-STAT signaling pathway (ko04630)
c33482.graph_c0	2.18968e-08	-1.47942	down	0.00104745	-0.754482	normal	0.01542	0.726974	normal	gi|678345665|emb|CDW71308.1|	rps6 protein kinase [Stylonychia lemnae]	RAC family serine/threonine-protein kinase homolog GN=pkbA OS=Dictyostelium discoideum (Slime mold) PE=1 SV=1	--	Molecular Function: protein kinase activity (GO:0004672);;	molecular function: catalytic activity (GO:0003824);; biological process: metabolic process (GO:0008152);; biological process: cellular process (GO:0009987)	K13302|4.62799e-91|pbi:103054879|SGK1; serum/glucocorticoid regulated kinase 1; K13302 serum/glucocorticoid-regulated kinase 1 [EC:2.7.11.1] (A)	FoxO signaling pathway (ko04068)
c36685.graph_c0	9.99853e-12	-1.9082	down	0.910097	0.0410749	normal	7.01479e-10	1.9544	up	gi|260830164|ref|XP_002610031.1|	hypothetical protein BRAFLDRAFT_99984 [Branchiostoma floridae]	cAMP-dependent protein kinase catalytic subunit GN=CAPK OS=Ascaris suum (Pig roundworm) PE=2 SV=1	Signal transduction mechanisms	Molecular Function: protein kinase activity (GO:0004672);;	molecular function: catalytic activity (GO:0003824);; biological process: metabolic process (GO:0008152);; biological process: cellular process (GO:0009987)	K04345|1.71451e-52|bfo:BRAFLDRAFT_99984|hypothetical protein; K04345 protein kinase A [EC:2.7.11.11] (A)	Wnt signaling pathway (ko04310);; Hedgehog signaling pathway (ko04340)
c42078.graph_c0	0.860417	-0.0996937	normal	0.000129986	1.14283	up	0.000109854	1.24263	up	gi|678306084|emb|CDW91611.1|	protein kinase domain containing protein [Stylonychia lemnae]	Serine/threonine-protein kinase sepA {ECO:0000250|UniProtKB:Q5B4Z3} OS=Dictyostelium discoideum (Slime mold) PE=2 SV=1	General function prediction only	Molecular Function: protein kinase activity (GO:0004672);;	molecular function: catalytic activity (GO:0003824);; biological process: metabolic process (GO:0008152);; biological process: cellular process (GO:0009987)	K17545|3.98587e-50|spu:586053|serine/threonine-protein kinase ULK4-like; K17545 serine/threonine-protein kinase ULK4 [EC:2.7.11.1] (A)	--
c42113.graph_c0	3.86519e-28	-3.16721	down	2.78115e-07	-1.24064	down	2.00192e-11	1.93191	up	gi|145484424|ref|XP_001428222.1|	hypothetical protein [Paramecium tetraurelia strain d4-2]	cAMP-dependent protein kinase catalytic subunit GN=CAPK OS=Ascaris suum (Pig roundworm) PE=2 SV=1	--	Molecular Function: protein kinase activity (GO:0004672);;	molecular function: catalytic activity (GO:0003824);; biological process: metabolic process (GO:0008152);; biological process: cellular process (GO:0009987)	K13302|1.25836e-73|cmk:103185144|s-sgk1; serine/threonine-protein kinase Sgk1-A-like; K13302 serum/glucocorticoid-regulated kinase 1 [EC:2.7.11.1] (A)	FoxO signaling pathway (ko04068)
c45093.graph_c0	0.595759	-0.258876	normal	0.00180127	-1.13801	down	0.0681425	-0.878294	normal	gi|403332715|gb|EJY65396.1|	Serine/threonine protein kinase [Oxytricha trifallax]	Probable serine/threonine-protein kinase 2 GN=PK2 OS=Plasmodium falciparum (isolate K1 / Thailand) PE=2 SV=1	Signal transduction mechanisms	Molecular Function: protein kinase activity (GO:0004672);;	molecular function: catalytic activity (GO:0003824);; biological process: metabolic process (GO:0008152);; biological process: cellular process (GO:0009987)	K16311|4.56813e-39|phu:Phum_PHUM368540|serine/threonine-protein kinase NIM1, putative (EC:2.7.11.17); K19009 serine/threonine-protein kinase SIK3 [EC:2.7.11.1] (A)	--
c49789.graph_c1	0.0169421	-0.875971	normal	0.000506339	-1.01037	down	0.821931	-0.133594	normal	gi|678324468|emb|CDW82180.1|	protein kinase domain containing protein [Stylonychia lemnae]	Calcium-dependent protein kinase 2 GN=CPK2 OS=Plasmodium falciparum (isolate 3D7) PE=2 SV=3	Signal transduction mechanisms	Molecular Function: protein kinase activity (GO:0004672);;	molecular function: catalytic activity (GO:0003824);; biological process: metabolic process (GO:0008152);; biological process: cellular process (GO:0009987)	K08803|2.18471e-24|phi:102102679|DAPK2; death-associated protein kinase 2; K08803 death-associated protein kinase [EC:2.7.11.1] (A)	--
c55427.graph_c0	0.884044	-0.102572	normal	0.000212149	-1.45535	down	0.00909145	-1.34649	down	gi|678336975|emb|CDW75713.1|	rps6 protein kinase [Stylonychia lemnae]	Probable serine/threonine-protein kinase DDB_G0277449 GN=DDB_G0277449 OS=Dictyostelium discoideum (Slime mold) PE=3 SV=1	--	Molecular Function: protein kinase activity (GO:0004672);;	molecular function: catalytic activity (GO:0003824);; biological process: metabolic process (GO:0008152);; biological process: cellular process (GO:0009987)	K04445|2.21659e-58|mze:101468435|ribosomal protein S6 kinase alpha-5-like; K04445 ribosomal protein S6 kinase alpha-5 [EC:2.7.11.1] (A)	MAPK signaling pathway (ko04010);; Adrenergic signaling in cardiomyocytes (ko04261)
c41835.graph_c0	0.129	0.868526	normal	9.86344e-06	1.40086	up	0.355292	0.541426	normal	gi|156385030|ref|XP_001633435.1|	predicted protein [Nematostella vectensis]	14-3-3-like protein GN=fttB OS=Dictyostelium discoideum (Slime mold) PE=1 SV=2	Posttranslational modification, protein turnover, chaperones	Molecular Function: protein domain specific binding (GO:0019904);;	molecular function: binding (GO:0005488)	K06630|1.14742e-86|nve:NEMVE_v1g104509|hypothetical protein; K06630 14-3-3 protein epsilon (A)	--
c31720.graph_c0	0.0450158	-0.864326	normal	0.00099428	-1.18707	down	0.57357	-0.320088	normal	gi|403376601|gb|EJY88281.1|	Heat shock protein DnaJ domain protein [Oxytricha trifallax]	DnaJ homolog dnj-20 (Precursor) OS=Caenorhabditis briggsae PE=3 SV=1	Posttranslational modification, protein turnover, chaperones	Molecular Function: protein binding (GO:0005515);; Molecular Function: ion binding (GO:0043167);;	molecular function: binding (GO:0005488)	K09517|1.17999e-13|xma:102226357|dnaJ homolog subfamily B member 11-like; K09517 DnaJ homolog subfamily B member 11 (A)	Protein processing in endoplasmic reticulum (ko04141)
c35987.graph_c0	0.952882	0.0509456	normal	0.000252579	-1.38525	down	0.00139148	-1.43304	down	gi|403376601|gb|EJY88281.1|	Heat shock protein DnaJ domain protein [Oxytricha trifallax]	Protein tumorous imaginal discs, mitochondrial (Precursor) GN=l(2)tid OS=Drosophila melanogaster (Fruit fly) PE=1 SV=2	Posttranslational modification, protein turnover, chaperones	Molecular Function: protein binding (GO:0005515);; Molecular Function: ion binding (GO:0043167);;	molecular function: binding (GO:0005488)	K09517|1.17768e-13|pss:102450359|DNAJB11; DnaJ (Hsp40) homolog, subfamily B, member 11; K09517 DnaJ homolog subfamily B member 11 (A)	Protein processing in endoplasmic reticulum (ko04141)
c40747.graph_c0	0.139632	-0.852413	normal	0.00023454	-1.69724	down	--	--	--	gi|678337499|emb|CDW75445.1|	UNKNOWN [Stylonychia lemnae]	Cysteine string protein GN=Csp OS=Drosophila melanogaster (Fruit fly) PE=1 SV=1	Posttranslational modification, protein turnover, chaperones	Molecular Function: protein binding (GO:0005515);; Molecular Function: ion binding (GO:0043167);;	molecular function: binding (GO:0005488)	--	--
c51629.graph_c0	0.375201	0.353903	normal	2.12335e-05	1.02397	up	0.0361516	0.673341	normal	gi|676446654|ref|XP_009051151.1|	hypothetical protein LOTGIDRAFT_226662 [Lottia gigantea]	Kinesin-II 95 kDa subunit GN=KRP95 OS=Strongylocentrotus purpuratus (Purple sea urchin) PE=1 SV=1	Cytoskeleton	Molecular Function: protein binding (GO:0005515);; Cellular Component: cytoskeleton (GO:0005856);; Molecular Function: hydrolase activity (GO:0016787);;	molecular function: binding (GO:0005488);; cellular component: cell (GO:0005623);; cellular component: organelle (GO:0043226);; cellular component: cell part (GO:0044464);; molecular function: catalytic activity (GO:0003824);; biological process: metabolic process (GO:0008152)	K10394|1.89785e-90|lgi:LOTGIDRAFT_226662|hypothetical protein; K10394 kinesin family member 3/17 (A)	--
c26322.graph_c0	0.0359945	-0.768329	normal	0.286745	0.352192	normal	0.00157631	1.12535	up	gi|678311681|emb|CDW88746.1|	b9 domain-containing protein 2 [Stylonychia lemnae]	--	Function unknown	Molecular Function: protein binding (GO:0005515);; Cellular Component: ciliary basal body (GO:0005932);; Biological Process: protein localization (GO:0008104);; Biological Process: determination of adult lifespan (GO:0008340);; Cellular Component: dendrite (GO:0030425);; Biological Process: larval foraging behavior (GO:0035177);; Cellular Component: ciliary transition zone (GO:0035869);; Biologic…	molecular function: binding (GO:0005488);; biological process: localization (GO:0051179);; biological process: multicellular organismal process (GO:0032501);; biological process: developmental process (GO:0032502);; biological process: single-organism process (GO:0044699);; cellular component: cell (GO:0005623);; cellular component: cell part (GO:0044464);; biological process: response to stimulu…	K16745|1.30602e-30|spu:576403|B9 domain-containing protein 2-like; K16745 B9 domain-containing protein 2 (A)	--
c35890.graph_c0	0.900065	-0.0825441	normal	0.00109614	1.09164	up	0.000292736	1.17924	up	gi|678311681|emb|CDW88746.1|	b9 domain-containing protein 2 [Stylonychia lemnae]	--	Function unknown	Molecular Function: protein binding (GO:0005515);; Cellular Component: ciliary basal body (GO:0005932);; Biological Process: protein localization (GO:0008104);; Biological Process: determination of adult lifespan (GO:0008340);; Cellular Component: dendrite (GO:0030425);; Biological Process: larval foraging behavior (GO:0035177);; Cellular Component: ciliary transition zone (GO:0035869);; Biologic…	molecular function: binding (GO:0005488);; biological process: localization (GO:0051179);; biological process: multicellular organismal process (GO:0032501);; biological process: developmental process (GO:0032502);; biological process: single-organism process (GO:0044699);; cellular component: cell (GO:0005623);; cellular component: cell part (GO:0044464);; biological process: response to stimulu…	K16745|3.3107e-28|spu:576403|B9 domain-containing protein 2-like; K16745 B9 domain-containing protein 2 (A)	--
c35406.graph_c1	--	--	--	0.00142694	1.90847	up	0.119145	1.17004	normal	gi|281209481|gb|EFA83649.1|	SH3 domain-containing protein [Polysphondylium pallidum PN500]	SH3 and FCH domain-containing protein DDB_G0274695 GN=DDB_G0274695 OS=Dictyostelium discoideum (Slime mold) PE=3 SV=1	Cytoskeleton	Molecular Function: protein binding (GO:0005515);; Biological Process: single-organism cellular process (GO:0044763);;	molecular function: binding (GO:0005488);; biological process: cellular process (GO:0009987);; biological process: single-organism process (GO:0044699)	--	--
c50108.graph_c0	0.251282	0.941323	normal	1.04901e-05	1.70665	up	0.271912	0.773972	normal	gi|66806903|ref|XP_637174.1|	hypothetical protein DDB_G0287505 [Dictyostelium discoideum AX4]	Talin-B GN=talB OS=Dictyostelium discoideum (Slime mold) PE=2 SV=1	Cytoskeleton	Molecular Function: protein binding (GO:0005515);; Biological Process: anatomical structure morphogenesis (GO:0009653);; Biological Process: single-organism cellular process (GO:0044763);; Biological Process: single-organism developmental process (GO:0044767);; Biological Process: organ development (GO:0048513);; Biological Process: biological regulation (GO:0065007);;	molecular function: binding (GO:0005488);; biological process: developmental process (GO:0032502);; biological process: cellular process (GO:0009987);; biological process: single-organism process (GO:0044699);; biological process: multicellular organismal process (GO:0032501);; biological process: biological regulation (GO:0065007)	K06271|2.91455e-108|dme:Dmel_CG6831|rhea; CG6831 gene product from transcript CG6831-RB; K06271 talin (A)	--
c53897.graph_c0	6.15315e-15	-2.53815	down	6.14587e-14	-2.45141	down	0.873621	0.0940491	normal	gi|157124299|ref|XP_001660410.1|	protein tyrosine phosphatase prl [Aedes aegypti]	Probable protein tyrosine phosphatase type IVA A (Precursor) GN=DDB_G0292024 OS=Dictyostelium discoideum (Slime mold) PE=3 SV=1	Signal transduction mechanisms	Molecular Function: phosphoprotein phosphatase activity (GO:0004721);; Cellular Component: cytoplasm (GO:0005737);; Cellular Component: plasma membrane (GO:0005886);; Biological Process: dephosphorylation (GO:0016311);;	molecular function: catalytic activity (GO:0003824);; biological process: metabolic process (GO:0008152);; biological process: cellular process (GO:0009987);; cellular component: cell (GO:0005623);; cellular component: cell part (GO:0044464);; cellular component: membrane (GO:0016020)	K18041|4.22025e-40|aag:AaeL_AAEL001798|protein tyrosine phosphatase prl; K18041 protein tyrosine phosphatase type IVA [EC:3.1.3.48] (A)	--
c47635.graph_c0	0.610287	0.250368	normal	2.69454e-05	1.03654	up	0.0288168	0.78795	normal	gi|586729467|gb|EAR85834.3|	phosphatidylinositol-3,4,5-trisphosphate 3-phosphatase [Tetrahymena thermophila SB210]	Phosphatidylinositol 3,4,5-trisphosphate 3-phosphatase cnrN GN=cnrN OS=Dictyostelium discoideum (Slime mold) PE=1 SV=1	--	Molecular Function: phosphoprotein phosphatase activity (GO:0004721);; Biological Process: protein dephosphorylation (GO:0006470);;	molecular function: catalytic activity (GO:0003824);; biological process: metabolic process (GO:0008152);; biological process: cellular process (GO:0009987)	K01110|8.41193e-14|dpo:Dpse_GA19047|GA19047 gene product from transcript GA19047-RA (EC:3.1.3.- 3.1.3.48); K01110 phosphatidylinositol-3,4,5-trisphosphate 3-phosphatase and dual-specificity protein phosphatase PTEN [EC:3.1.3.16 3.1.3.48 3.1.3.67] (A)	Inositol phosphate metabolism (ko00562);; FoxO signaling pathway (ko04068);; Phosphatidylinositol signaling system (ko04070);; mTOR signaling pathway (ko04150)
c40855.graph_c0	0.609106	0.361569	normal	1.97608e-06	1.64966	up	0.00213433	1.29069	up	gi|403337730|gb|EJY68087.1|	Protein phosphatase 2C containing protein [Oxytricha trifallax]	--	Signal transduction mechanisms	Molecular Function: phosphoprotein phosphatase activity (GO:0004721);; Biological Process: metabolic process (GO:0008152);;	molecular function: catalytic activity (GO:0003824);; biological process: metabolic process (GO:0008152);; biological process: cellular process (GO:0009987)	K17500|7.47137e-13|smm:Smp_147870|protein phosphatase 2C; K17500 integrin-linked kinase-associated serine/threonine phosphatase 2C [EC:3.1.3.16] (A)	--
c35204.graph_c0	0.0753051	-0.642656	normal	3.36449e-07	-1.31217	down	0.0234108	-0.664965	normal	gi|678331217|emb|CDW78718.1|	leucine rich repeat and phosphatase domain containing protein [Stylonychia lemnae]	MAP kinase phosphatase with leucine-rich repeats protein 1 GN=mpl1 OS=Dictyostelium discoideum (Slime mold) PE=2 SV=1	Defense mechanisms	Molecular Function: phosphoprotein phosphatase activity (GO:0004721);; Biological Process: dephosphorylation (GO:0016311);;	molecular function: catalytic activity (GO:0003824);; biological process: metabolic process (GO:0008152);; biological process: cellular process (GO:0009987)	K18042|1.37434e-30|dre:554088|styx, im:6908851, si:ch211-270g19.2, si:dkey-119m7.5, zgc:110621; serine/threonine/tyrosine interacting protein; K18042 serine/threonine/tyrosine-interacting protein (A)	--
c54391.graph_c0	1.52299e-06	-1.34295	down	0.225218	-0.318959	normal	0.000462162	1.02838	up	gi|403336768|gb|EJY67579.1|	Phosphatidylinositol-3,4,5-trisphosphate 3-phosphatase and dual-specificity protein phosphatase PTEN [Oxytricha trifallax]	Phosphatidylinositol 3,4,5-trisphosphate 3-phosphatase and dual-specificity protein phosphatase PTEN GN=pteN OS=Dictyostelium discoideum (Slime mold) PE=2 SV=1	--	Molecular Function: phosphoprotein phosphatase activity (GO:0004721);; Biological Process: dephosphorylation (GO:0016311);;	molecular function: catalytic activity (GO:0003824);; biological process: metabolic process (GO:0008152);; biological process: cellular process (GO:0009987)	K01110|5.65792e-84|cmk:103180851|pten; phosphatase and tensin homolog; K01110 phosphatidylinositol-3,4,5-trisphosphate 3-phosphatase and dual-specificity protein phosphatase PTEN [EC:3.1.3.16 3.1.3.48 3.1.3.67] (A)	Inositol phosphate metabolism (ko00562);; FoxO signaling pathway (ko04068);; Phosphatidylinositol signaling system (ko04070);; p53 signaling pathway (ko04115);; mTOR signaling pathway (ko04150);; Focal adhesion (ko04510);; Tight junction (ko04530)
c55351.graph_c0	0.209003	-0.416162	normal	1.4416e-07	-1.19176	down	0.00523769	-0.77129	normal	gi|678342240|emb|CDW73039.1|	dual specificity catalytic domain containing protein [Stylonychia lemnae]	Probable dual specificity protein phosphatase DDB_G0281963 GN=DDB_G0281963 OS=Dictyostelium discoideum (Slime mold) PE=3 SV=1	Defense mechanisms	Molecular Function: phosphoprotein phosphatase activity (GO:0004721);; Biological Process: dephosphorylation (GO:0016311);;	molecular function: catalytic activity (GO:0003824);; biological process: metabolic process (GO:0008152);; biological process: cellular process (GO:0009987)	K18042|4.36965e-22|nvi:100121993|serine/threonine/tyrosine-interacting protein-like; K18042 serine/threonine/tyrosine-interacting protein (A)	--
c33935.graph_c0	0.167005	0.534619	normal	1.18971e-09	1.635	up	0.000133908	1.10555	up	gi|403352605|gb|EJY75821.1|	Serine/threonine-protein phosphatase 2A catalytic subunit alpha isoform [Oxytricha trifallax]	Serine/threonine-protein phosphatase PP2A GN=mts OS=Drosophila melanogaster (Fruit fly) PE=2 SV=1	Signal transduction mechanisms	Molecular Function: phosphoprotein phosphatase activity (GO:0004721);;	molecular function: catalytic activity (GO:0003824);; biological process: metabolic process (GO:0008152);; biological process: cellular process (GO:0009987)	K04382|1.06432e-146|dre:550585|ppp2ca, zgc:110641; protein phosphatase 2, catalytic subunit, alpha isozyme (EC:3.1.3.16); K04382 serine/threonine-protein phosphatase 2A catalytic subunit [EC:3.1.3.16] (A)	mRNA surveillance pathway (ko03015);; Oocyte meiosis (ko04114);; Adrenergic signaling in cardiomyocytes (ko04261);; TGF-beta signaling pathway (ko04350);; Tight junction (ko04530)
c36763.graph_c0	0.182939	0.949833	normal	3.32656e-06	1.90727	up	0.0704241	0.962766	normal	gi|470431857|ref|XP_004338439.1|	protein phosphatase 6, catalytic subunit isoform a, putative [Acanthamoeba castellanii str. Neff]	Serine/threonine-protein phosphatase 6 catalytic subunit GN=ppp6c OS=Dictyostelium discoideum (Slime mold) PE=2 SV=2	--	Molecular Function: phosphoprotein phosphatase activity (GO:0004721);;	molecular function: catalytic activity (GO:0003824);; biological process: metabolic process (GO:0008152);; biological process: cellular process (GO:0009987)	K15498|4.38009e-176|ola:101171716|serine/threonine-protein phosphatase 6 catalytic subunit-like; K15498 serine/threonine-protein phosphatase 6 catalytic subunit [EC:3.1.3.16] (A)	--
c47582.graph_c2	0.932873	-0.0636532	normal	0.00159121	-1.02211	down	0.0400392	-0.950541	normal	gi|678319011|emb|CDW84967.1|	ser thr protein phosphatase family protein [Stylonychia lemnae]	Serine/threonine-protein phosphatase 6 catalytic subunit GN=ppp6c OS=Dictyostelium discoideum (Slime mold) PE=2 SV=2	--	Molecular Function: phosphoprotein phosphatase activity (GO:0004721);;	molecular function: catalytic activity (GO:0003824);; biological process: metabolic process (GO:0008152);; biological process: cellular process (GO:0009987)	K15498|8.10452e-76|tru:101070162|uncharacterized LOC101070162; K15498 serine/threonine-protein phosphatase 6 catalytic subunit [EC:3.1.3.16] (A)	--
c53565.graph_c0	0.110127	-0.516961	normal	1.1514e-08	-1.37113	down	0.000921262	-0.848913	normal	gi|167533804|ref|XP_001748581.1|	hypothetical protein [Monosiga brevicollis MX1]	Serine/threonine-protein phosphatase PP1-beta GN=gsp-2 OS=Caenorhabditis briggsae PE=3 SV=1	--	Molecular Function: phosphoprotein phosphatase activity (GO:0004721);;	molecular function: catalytic activity (GO:0003824);; biological process: metabolic process (GO:0008152);; biological process: cellular process (GO:0009987)	K06269|1.56073e-155|xma:102219385|serine/threonine-protein phosphatase PP1-beta catalytic subunit-like; K06269 serine/threonine-protein phosphatase PP1 catalytic subunit [EC:3.1.3.16] (A)	mRNA surveillance pathway (ko03015);; Oocyte meiosis (ko04114);; Adrenergic signaling in cardiomyocytes (ko04261);; Vascular smooth muscle contraction (ko04270);; Focal adhesion (ko04510);; Regulation of actin cytoskeleton (ko04810);; Insulin signaling pathway (ko04910);; Herpes simplex infection (ko05168)
c25068.graph_c0	0.63308	-0.237948	normal	0.000603524	-1.07263	down	0.0297295	-0.831842	normal	gi|167390715|ref|XP_001739468.1|	internalin-A precursor [Entamoeba dispar SAW760]	Probable rhodanese domain-containing dual specificity protein phosphatase GN=DDB_G0273729 OS=Dictyostelium discoideum (Slime mold) PE=3 SV=1	Defense mechanisms	Molecular Function: phosphoprotein phosphatase activity (GO:0004721);;	molecular function: catalytic activity (GO:0003824);; biological process: metabolic process (GO:0008152);; biological process: cellular process (GO:0009987)	K14165|2.01073e-15|ngi:103737004|Dusp22; dual specificity phosphatase 22; K14165 atypical dual specificity phosphatase [EC:3.1.3.16 3.1.3.48] (A)	--
c41443.graph_c0	0.129289	-0.661991	normal	2.522e-05	-1.40149	down	0.113509	-0.738555	normal	gi|586737095|gb|EAR97057.2|	serine/threonine phosphatase 2C [Tetrahymena thermophila SB210]	Probable protein phosphatase 2C 6 GN=GSPATT00019634001 OS=Paramecium tetraurelia PE=3 SV=1	Signal transduction mechanisms	Molecular Function: phosphoprotein phosphatase activity (GO:0004721);;	molecular function: catalytic activity (GO:0003824);; biological process: metabolic process (GO:0008152);; biological process: cellular process (GO:0009987)	K14803|2.68482e-19|cbr:CBG18025|Hypothetical protein CBG18025; K14803 protein phosphatase 2C homolog 2/3 [EC:3.1.3.16] (A)	--
c19236.graph_c0	5.00919e-10	-1.53579	down	8.21441e-09	-1.22641	down	0.333224	0.313653	normal	gi|403331998|gb|EJY64982.1|	Phosphoglycerate mutase [Oxytricha trifallax]	Probable phosphoglycerate mutase GN=gpmA OS=Dictyostelium discoideum (Slime mold) PE=1 SV=1	Carbohydrate transport and metabolism	Molecular Function: phosphoglycerate mutase activity (GO:0004619);; Cellular Component: cytosol (GO:0005829);; Biological Process: metabolic process (GO:0008152);;	molecular function: catalytic activity (GO:0003824);; biological process: metabolic process (GO:0008152);; cellular component: cell (GO:0005623);; cellular component: cell part (GO:0044464)	K01834|7.69818e-103|lgi:LOTGIDRAFT_187919|hypothetical protein; K01834 2,3-bisphosphoglycerate-dependent phosphoglycerate mutase [EC:5.4.2.11] (A)	Glycolysis / Gluconeogenesis (ko00010);; Glycine, serine and threonine metabolism (ko00260);; Carbon metabolism (ko01200);; Biosynthesis of amino acids (ko01230)
c35650.graph_c0	0.440133	0.749636	normal	0.000948617	1.63194	up	0.23276	0.893038	normal	gi|470309741|ref|XP_004364164.1|	phosphoglycerete kinase 1 [Capsaspora owczarzaki ATCC 30864]	Probable phosphoglycerate kinase GN=pgk-1 OS=Caenorhabditis elegans PE=1 SV=1	Carbohydrate transport and metabolism	Molecular Function: phosphoglycerate kinase activity (GO:0004618);; Molecular Function: ATP binding (GO:0005524);; Biological Process: glycolytic process (GO:0006096);; Biological Process: phosphorylation (GO:0016310);;	molecular function: catalytic activity (GO:0003824);; biological process: metabolic process (GO:0008152);; biological process: cellular process (GO:0009987);; molecular function: binding (GO:0005488);; biological process: single-organism process (GO:0044699)	K00927|0|cfr:102518336|PGK1; phosphoglycerate kinase 1; K00927 phosphoglycerate kinase [EC:2.7.2.3] (A)	Glycolysis / Gluconeogenesis (ko00010);; Carbon metabolism (ko01200);; Biosynthesis of amino acids (ko01230)
c53285.graph_c0	0.302934	-0.336974	normal	0.00177768	0.726815	normal	2.22021e-05	1.06843	up	gi|3122605|sp|O02608.1|PGK_EUPCR	RecName: Full=Phosphoglycerate kinase [Moneuplotes crassus]	Phosphoglycerate kinase GN=PGK OS=Euplotes crassus PE=3 SV=1	Carbohydrate transport and metabolism	Molecular Function: phosphoglycerate kinase activity (GO:0004618);; Molecular Function: ATP binding (GO:0005524);; Biological Process: glycolytic process (GO:0006096);; Biological Process: phosphorylation (GO:0016310);;	molecular function: catalytic activity (GO:0003824);; biological process: metabolic process (GO:0008152);; biological process: cellular process (GO:0009987);; molecular function: binding (GO:0005488);; biological process: single-organism process (GO:0044699)	K00927|4.16018e-174|loa:LOAG_06198|hypothetical protein; K00927 phosphoglycerate kinase [EC:2.7.2.3] (A)	Glycolysis / Gluconeogenesis (ko00010);; Carbon metabolism (ko01200);; Biosynthesis of amino acids (ko01230)
c54089.graph_c0	8.5258e-13	-1.85017	down	0.0199217	-0.513289	normal	1.38069e-06	1.34063	up	gi|678309326|emb|CDW89952.1|	phosphoglucomutase [Stylonychia lemnae]	Phosphoglucomutase-2 GN=pp63-2 OS=Paramecium tetraurelia PE=2 SV=1	Carbohydrate transport and metabolism	Molecular Function: phosphoglucomutase activity (GO:0004614);; Cellular Component: cytosol (GO:0005829);; Biological Process: glycogen biosynthetic process (GO:0005978);; Biological Process: trehalose biosynthetic process (GO:0005992);; Biological Process: galactose catabolic process (GO:0019388);; Molecular Function: metal ion binding (GO:0046872);;	molecular function: catalytic activity (GO:0003824);; biological process: metabolic process (GO:0008152);; cellular component: cell (GO:0005623);; cellular component: cell part (GO:0044464);; biological process: cellular process (GO:0009987);; biological process: single-organism process (GO:0044699);; molecular function: binding (GO:0005488)	K01835|0|mze:101478589|phosphoglucomutase-1-like; K01835 phosphoglucomutase [EC:5.4.2.2] (A)	Glycolysis / Gluconeogenesis (ko00010);; Pentose phosphate pathway (ko00030);; Galactose metabolism (ko00052);; Purine metabolism (ko00230);; Starch and sucrose metabolism (ko00500);; Amino sugar and nucleotide sugar metabolism (ko00520)
c44190.graph_c0	--	--	--	5.48192e-07	2.76428	up	0.00741858	1.53362	up	gi|470412385|ref|XP_004336465.1|	phosphoenolpyruvate carboxykinase (GTP), putative [Acanthamoeba castellanii str. Neff]	Phosphoenolpyruvate carboxykinase [GTP], mitochondrial (Precursor) GN=pck2 OS=Dictyostelium discoideum (Slime mold) PE=3 SV=1	Energy production and conversion	Molecular Function: phosphoenolpyruvate carboxykinase activity (GO:0004611);; Biological Process: metabolic process (GO:0008152);; Molecular Function: purine nucleotide binding (GO:0017076);;	molecular function: catalytic activity (GO:0003824);; biological process: metabolic process (GO:0008152);; molecular function: binding (GO:0005488)	--	--
c46323.graph_c0	0.000907346	0.896163	normal	0.225197	-0.284836	normal	6.63944e-07	-1.17847	down	gi|672567457|gb|KFH07390.1|	PEP-carboxykinase I [Toxoplasma gondii MAS]	Phosphoenolpyruvate carboxykinase [ATP] GN=pckA OS=Dictyostelium discoideum (Slime mold) PE=1 SV=1	--	Molecular Function: phosphoenolpyruvate carboxykinase activity (GO:0004611);; Biological Process: metabolic process (GO:0008152);; Molecular Function: purine nucleotide binding (GO:0017076);;	molecular function: catalytic activity (GO:0003824);; biological process: metabolic process (GO:0008152);; molecular function: binding (GO:0005488)	--	--
c48166.graph_c0	0.0704373	0.578676	normal	0.0813101	-0.477753	normal	0.000448132	-1.0539	down	gi|403349444|gb|EJY74162.1|	Phosphatidylinositol-3,4,5-trisphosphate 3-phosphatase [Oxytricha trifallax]	Phosphatidylinositol 3,4,5-trisphosphate 3-phosphatase and dual-specificity protein phosphatase PTEN GN=pteN OS=Dictyostelium discoideum (Slime mold) PE=2 SV=1	--	Molecular Function: phosphatase activity (GO:0016791);;	molecular function: catalytic activity (GO:0003824);; biological process: metabolic process (GO:0008152);; biological process: cellular process (GO:0009987)	K18080|1.90641e-48|aqu:100639977|uncharacterized LOC100639977; K18080 tensin (A)	--
c19049.graph_c0	0.229616	-0.633274	normal	1.77758e-12	2.10081	up	1.04322e-15	2.74156	up	gi|678318840|emb|CDW85059.1|	nli interacting factor-like phosphatase family protein [Stylonychia lemnae]	CTD small phosphatase-like protein 2 GN=ctdspl2 OS=Dictyostelium discoideum (Slime mold) PE=3 SV=1	Transcription	Molecular Function: phosphatase activity (GO:0016791);;	molecular function: catalytic activity (GO:0003824);; biological process: metabolic process (GO:0008152);; biological process: cellular process (GO:0009987)	K15731|5.49348e-29|mze:101473496|CTD small phosphatase-like protein-like; K15731 carboxy-terminal domain RNA polymerase II polypeptide A small phosphatase [EC:3.1.3.16] (A)	--
c27386.graph_c0	0.661691	-0.202268	normal	0.000519271	-1.01961	down	0.0394325	-0.816835	normal	gi|678345660|emb|CDW71311.1|	serine threonine-protein phosphatase dullard [Stylonychia lemnae]	Probable C-terminal domain small phosphatase GN=fcpA OS=Dictyostelium discoideum (Slime mold) PE=3 SV=1	Transcription	Molecular Function: phosphatase activity (GO:0016791);;	molecular function: catalytic activity (GO:0003824);; biological process: metabolic process (GO:0008152);; biological process: cellular process (GO:0009987)	K15731|6.26766e-23|lgi:LOTGIDRAFT_136404|hypothetical protein; K15731 carboxy-terminal domain RNA polymerase II polypeptide A small phosphatase [EC:3.1.3.16] (A)	--
c33937.graph_c0	0.287865	-0.41586	normal	0.000272102	-1.10109	down	0.113721	-0.685053	normal	gi|457876490|ref|XP_004224662.1|	phosphatase [Plasmodium cynomolgi strain B]	Probable C-terminal domain small phosphatase GN=fcpA OS=Dictyostelium discoideum (Slime mold) PE=3 SV=1	Transcription	Molecular Function: phosphatase activity (GO:0016791);;	molecular function: catalytic activity (GO:0003824);; biological process: metabolic process (GO:0008152);; biological process: cellular process (GO:0009987)	K15731|1.581e-12|phi:102109191|CTDSPL; CTD (carboxy-terminal domain, RNA polymerase II, polypeptide A) small phosphatase-like; K15731 carboxy-terminal domain RNA polymerase II polypeptide A small phosphatase [EC:3.1.3.16] (A)	--
c39587.graph_c0	0.0142196	-0.721857	normal	1.46518e-06	-1.04636	down	0.302441	-0.321548	normal	gi|678318840|emb|CDW85059.1|	nli interacting factor-like phosphatase family protein [Stylonychia lemnae]	CTD small phosphatase-like protein 3 GN=scpl-3 OS=Caenorhabditis elegans PE=3 SV=1	Transcription	Molecular Function: phosphatase activity (GO:0016791);;	molecular function: catalytic activity (GO:0003824);; biological process: metabolic process (GO:0008152);; biological process: cellular process (GO:0009987)	K17616|3.83241e-34|hro:HELRODRAFT_69237|hypothetical protein; K17616 CTD small phosphatase-like protein 2 [EC:3.1.3.-] (A)	--
c46138.graph_c0	0.0534811	-0.588218	normal	3.07112e-06	-1.11506	down	0.106735	-0.521957	normal	gi|678310427|emb|CDW89382.1|	nli interacting factor-like phosphatase family protein [Stylonychia lemnae]	CTD small phosphatase-like protein 2 GN=ctdspl2 OS=Dictyostelium discoideum (Slime mold) PE=3 SV=1	Transcription	Molecular Function: phosphatase activity (GO:0016791);;	molecular function: catalytic activity (GO:0003824);; biological process: metabolic process (GO:0008152);; biological process: cellular process (GO:0009987)	K17616|1.16894e-29|lgi:LOTGIDRAFT_124631|hypothetical protein; K17616 CTD small phosphatase-like protein 2 [EC:3.1.3.-] (A)	--
c18811.graph_c1	--	--	--	9.02659e-06	2.13185	up	0.0135235	1.29138	normal	gi|118398387|ref|XP_001031522.1|	AhpC/TSA family protein [Tetrahymena thermophila]	Thioredoxin peroxidase GN=TPX OS=Echinococcus granulosus (Hydatid tapeworm) PE=2 SV=1	Posttranslational modification, protein turnover, chaperones	Molecular Function: peroxidase activity (GO:0004601);; Molecular Function: peroxiredoxin activity (GO:0051920);; Biological Process: oxidation-reduction process (GO:0055114);;	molecular function: catalytic activity (GO:0003824);; molecular function: antioxidant activity (GO:0016209);; biological process: metabolic process (GO:0008152);; biological process: single-organism process (GO:0044699)	K03386|1.63218e-26|dwi:Dwil_GK16580|GK16580 gene product from transcript GK16580-RA; K03386 peroxiredoxin (alkyl hydroperoxide reductase subunit C) [EC:1.11.1.15] (A)	--
c20690.graph_c0	0.258114	0.924123	normal	0.00099694	1.50088	up	0.414997	0.58718	normal	gi|470379927|ref|XP_004333640.1|	peroxiredoxin 2, putative [Acanthamoeba castellanii str. Neff]	Peroxiredoxin-4 GN=prdx4 OS=Dictyostelium discoideum (Slime mold) PE=1 SV=2	Posttranslational modification, protein turnover, chaperones	Molecular Function: peroxidase activity (GO:0004601);; Molecular Function: peroxiredoxin activity (GO:0051920);; Biological Process: oxidation-reduction process (GO:0055114);;	molecular function: catalytic activity (GO:0003824);; molecular function: antioxidant activity (GO:0016209);; biological process: metabolic process (GO:0008152);; biological process: single-organism process (GO:0044699)	K03386|6.37194e-94|ssc:100512521|PRDX2; peroxiredoxin 2; K03386 peroxiredoxin (alkyl hydroperoxide reductase subunit C) [EC:1.11.1.15] (A)	--
c40341.graph_c0	0.232841	-0.561767	normal	2.46818e-05	-1.29765	down	0.0699308	-0.727858	normal	gi|118359822|ref|XP_001013149.1|	Thioredoxin-dependent peroxide reductase, mitochondrial precursor, putative [Tetrahymena thermophila]	Peroxiredoxin 1 GN=Jafrac1 OS=Drosophila melanogaster (Fruit fly) PE=1 SV=1	Posttranslational modification, protein turnover, chaperones	Molecular Function: peroxidase activity (GO:0004601);; Molecular Function: peroxiredoxin activity (GO:0051920);; Biological Process: oxidation-reduction process (GO:0055114);;	molecular function: catalytic activity (GO:0003824);; molecular function: antioxidant activity (GO:0016209);; biological process: metabolic process (GO:0008152);; biological process: single-organism process (GO:0044699)	K03386|8.56903e-82|cin:100175802|peroxiredoxin-like; K03386 peroxiredoxin (alkyl hydroperoxide reductase subunit C) [EC:1.11.1.15] (A)	--
c54141.graph_c0	1.38363e-07	-1.37927	down	0.0476763	-0.540581	normal	0.00801179	0.841852	normal	gi|220715330|gb|ACL81236.1|	glutathione peroxidase [Moneuplotes crassus]	Glutathione peroxidase GN=GPX1 OS=Schistosoma mansoni (Blood fluke) PE=1 SV=2	Posttranslational modification, protein turnover, chaperones	Molecular Function: peroxidase activity (GO:0004601);;	molecular function: catalytic activity (GO:0003824);; molecular function: antioxidant activity (GO:0016209);; biological process: metabolic process (GO:0008152);; biological process: single-organism process (GO:0044699)	--	--
c55459.graph_c0	0.397493	-0.300135	normal	2.48206e-18	-2.03235	down	1.53734e-09	-1.72836	down	gi|403372760|gb|EJY86286.1|	L-ascorbate peroxidase 3, peroxisomal [Oxytricha trifallax]	--	--	Molecular Function: peroxidase activity (GO:0004601);;	molecular function: catalytic activity (GO:0003824);; molecular function: antioxidant activity (GO:0016209);; biological process: metabolic process (GO:0008152);; biological process: single-organism process (GO:0044699)	--	--
c39885.graph_c0	0.445375	0.283029	normal	0.000402055	-0.833271	normal	8.26896e-05	-1.11498	down	gi|678319441|emb|CDW84742.1|	proliferation-associated protein 2g4 [Stylonychia lemnae]	Proliferation-associated protein A GN=prlA OS=Dictyostelium discoideum (Slime mold) PE=2 SV=1	General function prediction only	Molecular Function: peptidase activity, acting on L-amino acid peptides (GO:0070011);;	molecular function: catalytic activity (GO:0003824);; biological process: metabolic process (GO:0008152)	--	--
c45663.graph_c0	8.59875e-05	-1.106	down	0.00744965	-0.715486	normal	0.316269	0.39596	normal	gi|403370087|gb|EJY84904.1|	ATP-dependent metalloprotease FtsH family protein [Oxytricha trifallax]	ATP-dependent zinc metalloprotease YME1 homolog GN=ymel-1 OS=Caenorhabditis elegans PE=3 SV=2	Posttranslational modification, protein turnover, chaperones	Molecular Function: peptidase activity (GO:0008233);; Molecular Function: transferase activity (GO:0016740);; Molecular Function: organic cyclic compound binding (GO:0097159);; Molecular Function: heterocyclic compound binding (GO:1901363);;	molecular function: catalytic activity (GO:0003824);; biological process: metabolic process (GO:0008152);; molecular function: binding (GO:0005488)	K08955|3.26084e-125|nve:NEMVE_v1g158178|hypothetical protein; K08955 ATP-dependent metalloprotease [EC:3.4.24.-] (A)	--
c22043.graph_c0	0.570115	0.216852	normal	1.41803e-06	1.16706	up	0.00024045	0.955459	normal	gi|403345630|gb|EJY72191.1|	Proteasome subunit beta type [Oxytricha trifallax]	Proteasome subunit beta type-6 (Precursor) GN=psmB6 OS=Dictyostelium discoideum (Slime mold) PE=1 SV=1	Posttranslational modification, protein turnover, chaperones	Molecular Function: peptidase activity (GO:0008233);; Cellular Component: intracellular part (GO:0044424);;	molecular function: catalytic activity (GO:0003824);; biological process: metabolic process (GO:0008152);; cellular component: cell (GO:0005623);; cellular component: cell part (GO:0044464)	K02738|3.7503e-47|tup:102499183|PSMB6; proteasome (prosome, macropain) subunit, beta type, 6; K02738 20S proteasome subunit beta 1 [EC:3.4.25.1] (A)	Proteasome (ko03050)
c34755.graph_c0	0.729712	-0.160927	normal	0.000911196	0.862888	normal	0.000714146	1.02829	up	gi|403356758|gb|EJY77982.1|	Proteasome subunit beta type, putative [Oxytricha trifallax]	Proteasome subunit beta type-2 GN=psmB2 OS=Dictyostelium discoideum (Slime mold) PE=3 SV=1	Posttranslational modification, protein turnover, chaperones	Molecular Function: peptidase activity (GO:0008233);; Cellular Component: intracellular part (GO:0044424);;	molecular function: catalytic activity (GO:0003824);; biological process: metabolic process (GO:0008152);; cellular component: cell (GO:0005623);; cellular component: cell part (GO:0044464)	K02734|1.36707e-46|lgi:LOTGIDRAFT_181139|hypothetical protein; K02734 20S proteasome subunit beta 4 [EC:3.4.25.1] (A)	Proteasome (ko03050)
c35781.graph_c0	0.0915809	-0.539242	normal	0.0018702	0.720231	normal	1.03711e-06	1.26374	up	gi|678336796|emb|CDW75801.1|	proteasome subunit beta type [Stylonychia lemnae]	Proteasome subunit beta type-7 (Precursor) GN=psmB7 OS=Dictyostelium discoideum (Slime mold) PE=3 SV=1	Posttranslational modification, protein turnover, chaperones	Molecular Function: peptidase activity (GO:0008233);; Cellular Component: intracellular part (GO:0044424);;	molecular function: catalytic activity (GO:0003824);; biological process: metabolic process (GO:0008152);; cellular component: cell (GO:0005623);; cellular component: cell part (GO:0044464)	K02739|4.1526e-72|amj:102571198|PSMB7; proteasome (prosome, macropain) subunit, beta type, 7; K02739 20S proteasome subunit beta 2 [EC:3.4.25.1] (A)	Proteasome (ko03050)
c35956.graph_c0	0.656906	-0.202075	normal	0.00305755	0.860261	normal	6.22895e-05	1.0689	up	gi|678340682|emb|CDW73822.1|	UNKNOWN [Stylonychia lemnae]	Proteasome subunit beta type-1 GN=psmB1 OS=Dictyostelium discoideum (Slime mold) PE=3 SV=1	Posttranslational modification, protein turnover, chaperones	Molecular Function: peptidase activity (GO:0008233);; Cellular Component: intracellular part (GO:0044424);;	molecular function: catalytic activity (GO:0003824);; biological process: metabolic process (GO:0008152);; cellular component: cell (GO:0005623);; cellular component: cell part (GO:0044464)	K02732|1.09118e-58|tgu:100190747|proteasome subunit beta type 1-like; K02732 20S proteasome subunit beta 6 [EC:3.4.25.1] (A)	Proteasome (ko03050)
c39272.graph_c0	1	-0.00363843	normal	7.39314e-08	1.17898	up	3.13358e-06	1.18672	up	gi|403374952|gb|EJY87444.1|	Proteasome subunit beta type-3 [Oxytricha trifallax]	Proteasome subunit beta type-3 GN=psmB3 OS=Dictyostelium discoideum (Slime mold) PE=3 SV=1	Posttranslational modification, protein turnover, chaperones	Molecular Function: peptidase activity (GO:0008233);; Cellular Component: intracellular part (GO:0044424);;	molecular function: catalytic activity (GO:0003824);; biological process: metabolic process (GO:0008152);; cellular component: cell (GO:0005623);; cellular component: cell part (GO:0044464)	K02735|7.73208e-71|nve:NEMVE_v1g99390|hypothetical protein; K02735 20S proteasome subunit beta 3 [EC:3.4.25.1] (A)	Proteasome (ko03050)
c26798.graph_c0	--	--	--	1.43934e-05	2.42504	up	0.00919281	1.78384	up	gi|74817836|sp|Q8MZS4.1|PHYSA_PHYPO	RecName: Full=Physarolisin; AltName: Full=Physaropepsin; Contains: RecName: Full=Physarolisin heavy chain; Contains: RecName: Full=Physarolisin light chain; Flags: Precursor [Physarum polycephalum]	Physarolisin light chain (Precursor) OS=Physarum polycephalum (Slime mold) PE=1 SV=1	--	Molecular Function: peptidase activity (GO:0008233);;	molecular function: catalytic activity (GO:0003824);; biological process: metabolic process (GO:0008152)	K01279|1.38152e-31|ocu:100356773|TPP1; tripeptidyl peptidase I; K01279 tripeptidyl-peptidase I [EC:3.4.14.9] (A)	Lysosome (ko04142)
c44568.graph_c0	--	--	--	4.97806e-05	2.05043	up	0.240551	0.856807	normal	gi|330797375|ref|XP_003286736.1|	hypothetical protein DICPUDRAFT_46984 [Dictyostelium purpureum]	Physarolisin light chain (Precursor) OS=Physarum polycephalum (Slime mold) PE=1 SV=1	--	Molecular Function: peptidase activity (GO:0008233);;	molecular function: catalytic activity (GO:0003824);; biological process: metabolic process (GO:0008152)	K01279|1.69667e-25|mmu:12751|Tpp1, Cln2, TPP-I; tripeptidyl peptidase I (EC:3.4.14.9); K01279 tripeptidyl-peptidase I [EC:3.4.14.9] (A)	Lysosome (ko04142)
c27923.graph_c0	0.518696	0.508756	normal	6.67759e-05	1.66931	up	0.047722	1.17188	normal	gi|735994458|dbj|GAM20147.1|	hypothetical protein SAMD00019534_033220 [Acytostelium subglobosum LB1]	Cathepsin D (Precursor) GN=ctsD OS=Dictyostelium discoideum (Slime mold) PE=1 SV=1	Posttranslational modification, protein turnover, chaperones	Molecular Function: peptidase activity (GO:0008233);;	molecular function: catalytic activity (GO:0003824);; biological process: metabolic process (GO:0008152)	K01379|7.23077e-132|nve:NEMVE_v1g81470|hypothetical protein; K01379 cathepsin D [EC:3.4.23.5] (A)	Lysosome (ko04142)
c46164.graph_c0	0.133071	-0.537593	normal	5.28783e-06	-1.21119	down	0.0752112	-0.675055	normal	gi|403341001|gb|EJY69795.1|	Calpain family cysteine protease containing protein [Oxytricha trifallax]	Calpain-D GN=sol OS=Drosophila melanogaster (Fruit fly) PE=1 SV=2	--	Molecular Function: peptidase activity (GO:0008233);;	molecular function: catalytic activity (GO:0003824);; biological process: metabolic process (GO:0008152)	K08582|1.35001e-62|umr:103668734|CAPN15; calpain 15; K08582 calpain-15 [EC:3.4.22.-] (A)	--
c46322.graph_c1	0.000128213	1.08195	up	0.765857	0.0960431	normal	0.000599691	-0.980401	normal	gi|678329327|emb|CDW79700.1|	papain family cysteine protease containing protein [Stylonychia lemnae]	Cathepsin B-like cysteine proteinase 1 (Precursor) GN=CP-1 OS=Ostertagia ostertagi (Brown stomach worm) PE=3 SV=3	Posttranslational modification, protein turnover, chaperones	Molecular Function: peptidase activity (GO:0008233);;	molecular function: catalytic activity (GO:0003824);; biological process: metabolic process (GO:0008152)	K08568|1.66225e-136|aqu:100632176|uncharacterized LOC100632176; K08568 cathepsin X [EC:3.4.18.1] (A)	Lysosome (ko04142)
c37954.graph_c0	0.000753298	1.03325	up	0.0628884	0.526815	normal	0.0939532	-0.500303	normal	gi|678339863|emb|CDW74234.1|	3-hydroxyisobutyrate dehydrogenase [Stylonychia lemnae]	Probable 3-hydroxyisobutyrate dehydrogenase, mitochondrial (Precursor) GN=hibA OS=Dictyostelium discoideum (Slime mold) PE=3 SV=1	General function prediction only	Molecular Function: oxidoreductase activity, acting on the CH-OH group of donors, NAD or NADP as acceptor (GO:0016616);; Biological Process: cellular metabolic process (GO:0044237);; Biological Process: primary metabolic process (GO:0044238);; Biological Process: small molecule metabolic process (GO:0044281);; Biological Process: oxidation-reduction process (GO:0055114);; Biological Process: orga…	molecular function: catalytic activity (GO:0003824);; biological process: metabolic process (GO:0008152);; biological process: single-organism process (GO:0044699);; biological process: cellular process (GO:0009987)	--	--
c32565.graph_c0	--	--	--	0.00159933	1.72056	up	0.270578	0.914574	normal	gi|260823639|ref|XP_002606188.1|	hypothetical protein BRAFLDRAFT_126506 [Branchiostoma floridae]	UDP-glucose 6-dehydrogenase GN=sgl OS=Drosophila melanogaster (Fruit fly) PE=1 SV=1	--	Molecular Function: oxidoreductase activity, acting on the CH-OH group of donors, NAD or NADP as acceptor (GO:0016616);;	molecular function: catalytic activity (GO:0003824);; biological process: metabolic process (GO:0008152);; biological process: single-organism process (GO:0044699)	K00012|7.64795e-179|bfo:BRAFLDRAFT_126506|hypothetical protein; K00012 UDPglucose 6-dehydrogenase [EC:1.1.1.22] (A)	Pentose and glucuronate interconversions (ko00040);; Ascorbate and aldarate metabolism (ko00053);; Starch and sucrose metabolism (ko00500);; Amino sugar and nucleotide sugar metabolism (ko00520)
c37788.graph_c0	--	--	--	0.000147266	1.90608	up	0.371649	0.741982	normal	gi|735860222|dbj|GAM17528.1|	hypothetical protein SAMD00019534_007030 [Acytostelium subglobosum LB1]	V-type proton ATPase subunit D OS=Caenorhabditis briggsae PE=3 SV=1	Amino acid transport and metabolism	Molecular Function: oxidoreductase activity, acting on the CH-CH group of donors (GO:0016627);;	molecular function: catalytic activity (GO:0003824);; biological process: metabolic process (GO:0008152);; biological process: single-organism process (GO:0044699)	K02149|2.08446e-76|lgi:LOTGIDRAFT_233963|hypothetical protein; K02149 V-type H+-transporting ATPase subunit D (A)	Oxidative phosphorylation (ko00190);; Phagosome (ko04145)
c42085.graph_c0	0.623022	-0.194366	normal	5.94611e-05	-1.00538	down	0.00434748	-0.805894	normal	gi|403337417|gb|EJY67922.1|	Acyl-CoA dehydrogenase, putative [Oxytricha trifallax]	Probable glutaryl-CoA dehydrogenase, mitochondrial (Precursor) GN=F54D5.7 OS=Caenorhabditis elegans PE=1 SV=1	Amino acid transport and metabolism	Molecular Function: oxidoreductase activity, acting on the CH-CH group of donors (GO:0016627);;	molecular function: catalytic activity (GO:0003824);; biological process: metabolic process (GO:0008152);; biological process: single-organism process (GO:0044699)	K00252|2.0315e-60|phi:102108552|GCDH; glutaryl-CoA dehydrogenase; K00252 glutaryl-CoA dehydrogenase [EC:1.3.8.6] (A)	Fatty acid degradation (ko00071);; Lysine degradation (ko00310);; Tryptophan metabolism (ko00380)
c31921.graph_c0	--	--	--	0.000397718	1.67978	up	0.463908	0.579389	normal	gi|694535575|ref|XP_009495361.1|	hypothetical protein H696_03202 [Fonticula alba]	--	--	Molecular Function: oxidoreductase activity (GO:0016491);; Molecular Function: transferase activity, transferring acyl groups other than amino-acyl groups (GO:0016747);;	molecular function: catalytic activity (GO:0003824);; biological process: metabolic process (GO:0008152);; biological process: single-organism process (GO:0044699)	--	--
c38054.graph_c0	0.734785	0.345079	normal	2.59356e-06	1.70398	up	0.0457635	1.36946	normal	gi|694535575|ref|XP_009495361.1|	hypothetical protein H696_03202 [Fonticula alba]	--	--	Molecular Function: oxidoreductase activity (GO:0016491);; Molecular Function: transferase activity, transferring acyl groups other than amino-acyl groups (GO:0016747);;	molecular function: catalytic activity (GO:0003824);; biological process: metabolic process (GO:0008152);; biological process: single-organism process (GO:0044699)	--	--
c48325.graph_c1	2.03853e-06	2.69197	up	--	--	--	1.6202e-05	-2.34471	down	gi|678334291|emb|CDW77130.1|	dynein heavy chain family protein [Stylonychia lemnae]	Dynein beta chain, ciliary OS=Heliocidaris crassispina (Sea urchin) PE=1 SV=1	Cytoskeleton	Molecular Function: oxidoreductase activity (GO:0016491);; Molecular Function: transferase activity (GO:0016740);; Molecular Function: nucleoside-triphosphatase activity (GO:0017111);;	molecular function: catalytic activity (GO:0003824);; biological process: metabolic process (GO:0008152);; biological process: single-organism process (GO:0044699)	K10408|0|aga:AgaP_AGAP010435|AGAP010435-PA; K10408 dynein heavy chain, axonemal (A)	--
c32785.graph_c0	0.22681	0.882424	normal	0.107006	-0.914639	normal	2.58859e-06	-1.80004	down	gi|678334291|emb|CDW77130.1|	dynein heavy chain family protein [Stylonychia lemnae]	Dynein beta chain, ciliary OS=Tripneustes gratilla (Hawaian sea urchin) PE=1 SV=1	Cytoskeleton	Molecular Function: oxidoreductase activity (GO:0016491);; Molecular Function: nucleoside-triphosphatase activity (GO:0017111);;	molecular function: catalytic activity (GO:0003824);; biological process: metabolic process (GO:0008152);; biological process: single-organism process (GO:0044699)	K10408|3.54155e-146|pss:102458657|dynein heavy chain 9, axonemal-like; K10408 dynein heavy chain, axonemal (A)	--
c52226.graph_c0	0.59046	0.459701	normal	0.00156609	1.50567	up	0.126196	1.06144	normal	gi|470294709|ref|XP_004344470.1|	cytochrome c-1 [Capsaspora owczarzaki ATCC 30864]	Cytochrome c1, heme protein, mitochondrial (Precursor) GN=cyc1 OS=Dictyostelium discoideum (Slime mold) PE=3 SV=1	Energy production and conversion	Molecular Function: oxidoreductase activity (GO:0016491);; Molecular Function: metal ion binding (GO:0046872);; Molecular Function: iron-sulfur cluster binding (GO:0051536);;	molecular function: catalytic activity (GO:0003824);; biological process: metabolic process (GO:0008152);; biological process: single-organism process (GO:0044699);; molecular function: binding (GO:0005488)	K00413|1.90334e-88|amj:102557815|cytochrome c1, heme protein, mitochondrial-like; K00413 ubiquinol-cytochrome c reductase cytochrome c1 subunit (A)	Oxidative phosphorylation (ko00190);; Cardiac muscle contraction (ko04260)
c42697.graph_c0	--	--	--	0.0021145	1.77366	up	0.287059	0.79099	normal	gi|330792952|ref|XP_003284550.1|	hypothetical protein DICPUDRAFT_96745 [Dictyostelium purpureum]	Xanthine dehydrogenase GN=xdh OS=Dictyostelium discoideum (Slime mold) PE=3 SV=1	Nucleotide transport and metabolism	Molecular Function: oxidoreductase activity (GO:0016491);; Molecular Function: metal ion binding (GO:0046872);;	molecular function: catalytic activity (GO:0003824);; biological process: metabolic process (GO:0008152);; biological process: single-organism process (GO:0044699);; molecular function: binding (GO:0005488)	K00106|0|tgu:100222890|XDH; xanthine dehydrogenase; K00106 xanthine dehydrogenase/oxidase [EC:1.17.1.4 1.17.3.2] (A)	Purine metabolism (ko00230);; Caffeine metabolism (ko00232);; Drug metabolism - other enzymes (ko00983);; Peroxisome (ko04146)
c35761.graph_c0	0.756941	-0.23699	normal	0.00314384	-1.47812	down	0.0161019	-1.23739	normal	gi|678327312|emb|CDW80727.1|	calmodulin [Stylonychia lemnae]	Calmodulin OS=Plasmodium falciparum PE=3 SV=4	Signal transduction mechanisms	Molecular Function: oxidoreductase activity (GO:0016491);; Molecular Function: metal ion binding (GO:0046872);;	molecular function: catalytic activity (GO:0003824);; biological process: metabolic process (GO:0008152);; biological process: single-organism process (GO:0044699);; molecular function: binding (GO:0005488)	K02183|1.00956e-45|hgl:101716865|Calml3; calmodulin-like 3; K02183 calmodulin (A)	Ras signaling pathway (ko04014);; Rap1 signaling pathway (ko04015);; Calcium signaling pathway (ko04020);; cGMP-PKG signaling pathway (ko04022);; cAMP signaling pathway (ko04024);; Phosphatidylinositol signaling system (ko04070);; Oocyte meiosis (ko04114);; Adrenergic signaling in cardiomyocytes (ko04261);; Vascular smooth muscle contraction (ko04270);; Circadian entrainment (ko04713);; Long-term…
c42122.graph_c0	0.0438481	1.20457	normal	0.00165473	1.5516	up	0.626177	0.360105	normal	gi|167521137|ref|XP_001744907.1|	hypothetical protein [Monosiga brevicollis MX1]	Delta(5) fatty acid desaturase A GN=fadA OS=Dictyostelium discoideum (Slime mold) PE=1 SV=1	Energy production and conversion	Molecular Function: oxidoreductase activity (GO:0016491);; Molecular Function: ion binding (GO:0043167);; Molecular Function: organic cyclic compound binding (GO:0097159);; Molecular Function: heterocyclic compound binding (GO:1901363);;	molecular function: catalytic activity (GO:0003824);; biological process: metabolic process (GO:0008152);; biological process: single-organism process (GO:0044699);; molecular function: binding (GO:0005488)	--	--
c47087.graph_c0	--	--	--	9.78228e-18	6.67471	up	7.22816e-12	4.81925	up	gi|167522603|ref|XP_001745639.1|	hypothetical protein [Monosiga brevicollis MX1]	Pyruvate dehydrogenase [NADP(+)] GN=PFOR OS=Cryptosporidium parvum PE=2 SV=1	Inorganic ion transport and metabolism	Molecular Function: oxidoreductase activity (GO:0016491);; Molecular Function: ion binding (GO:0043167);; Biological Process: cellular metabolic process (GO:0044237);; Biological Process: single-organism metabolic process (GO:0044710);; Molecular Function: organic cyclic compound binding (GO:0097159);; Molecular Function: heterocyclic compound binding (GO:1901363);;	molecular function: catalytic activity (GO:0003824);; biological process: metabolic process (GO:0008152);; biological process: single-organism process (GO:0044699);; molecular function: binding (GO:0005488);; biological process: cellular process (GO:0009987)	--	--
c50151.graph_c2	0.0105582	0.872866	normal	2.578e-05	1.13735	up	0.494013	0.264894	normal	gi|586733016|gb|EAS01078.3|	sodium/hydrogen exchanger family protein [Tetrahymena thermophila SB210]	Na(+)/H(+) exchanger protein 7 {ECO:0000303|PubMed:18291648} OS=Caenorhabditis elegans PE=1 SV=1	Inorganic ion transport and metabolism	Molecular Function: oxidoreductase activity (GO:0016491);; Biological Process: single-organism transport (GO:0044765);;	molecular function: catalytic activity (GO:0003824);; biological process: metabolic process (GO:0008152);; biological process: single-organism process (GO:0044699);; biological process: localization (GO:0051179)	K14726|4.60311e-86|spu:754777|NHE; sperm-specific sodium proton exchanger; K14726 solute carrier family 9 (sodium/hydrogen exchanger), member 10/11 (A)	--
c22304.graph_c0	0.798373	-0.121059	normal	2.73296e-05	-1.14481	down	0.00227785	-1.01721	down	gi|586737079|gb|EAR97022.2|	cytochrome b5-like heme/steroid-binding domain protein [Tetrahymena thermophila SB210]	Delta(5) fatty acid desaturase B GN=fadB OS=Dictyostelium discoideum (Slime mold) PE=1 SV=1	Lipid transport and metabolism	Molecular Function: oxidoreductase activity (GO:0016491);; Biological Process: single-organism metabolic process (GO:0044710);;	molecular function: catalytic activity (GO:0003824);; biological process: metabolic process (GO:0008152);; biological process: single-organism process (GO:0044699)	--	--
c34375.graph_c0	0.0532332	1.2142	normal	2.94402e-07	1.78672	up	0.342089	0.583086	normal	gi|735857682|dbj|GAM19123.1|	hypothetical protein SAMD00019534_022980 [Acytostelium subglobosum LB1]	Glutamate dehydrogenase, mitochondrial (Precursor) GN=gluD OS=Dictyostelium discoideum (Slime mold) PE=1 SV=1	Amino acid transport and metabolism	Molecular Function: oxidoreductase activity (GO:0016491);; Biological Process: single-organism metabolic process (GO:0044710);;	molecular function: catalytic activity (GO:0003824);; biological process: metabolic process (GO:0008152);; biological process: single-organism process (GO:0044699)	K00261|3.75489e-150|nve:NEMVE_v1g243194|hypothetical protein; K00261 glutamate dehydrogenase (NAD(P)+) [EC:1.4.1.3] (A)	Alanine, aspartate and glutamate metabolism (ko00250);; Arginine and proline metabolism (ko00330);; Nitrogen metabolism (ko00910)
c26243.graph_c0	0.305178	0.753256	normal	4.24752e-06	1.51631	up	0.23951	0.772947	normal	gi|196013623|ref|XP_002116672.1|	hypothetical protein TRIADDRAFT_31445 [Trichoplax adhaerens]	Cytochrome P450 4C1 GN=CYP4C1 OS=Blaberus discoidalis (Tropical cockroach) PE=2 SV=1	--	Molecular Function: oxidoreductase activity (GO:0016491);;	molecular function: catalytic activity (GO:0003824);; biological process: metabolic process (GO:0008152);; biological process: single-organism process (GO:0044699)	K07426|1.57427e-104|phi:102112174|cytochrome P450 4B1-like; K07426 cytochrome P450, family 4, subfamily B, polypeptide 1 [EC:1.14.14.1] (A)	--
c39980.graph_c0	--	--	--	0.00137772	1.83017	up	0.525922	0.475207	normal	gi|294886029|ref|XP_002771522.1|	acyl-CoA dehydrogenase, putative [Perkinsus marinus ATCC 50983]	Probable medium-chain specific acyl-CoA dehydrogenase, mitochondrial (Precursor) GN=CG12262 OS=Drosophila melanogaster (Fruit fly) PE=1 SV=1	Lipid transport and metabolism	Molecular Function: oxidoreductase activity (GO:0016491);;	molecular function: catalytic activity (GO:0003824);; biological process: metabolic process (GO:0008152);; biological process: single-organism process (GO:0044699)	--	--
c52489.graph_c0	0.732681	-0.131138	normal	3.91595e-06	-1.01044	down	0.000912396	-0.876936	normal	gi|403358699|gb|EJY79003.1|	3-hydroxyisobutyrate dehydrogenase family protein [Oxytricha trifallax]	Probable 3-hydroxyisobutyrate dehydrogenase, mitochondrial (Precursor) GN=hibA OS=Dictyostelium discoideum (Slime mold) PE=3 SV=1	General function prediction only	Molecular Function: oxidoreductase activity (GO:0016491);;	molecular function: catalytic activity (GO:0003824);; biological process: metabolic process (GO:0008152);; biological process: single-organism process (GO:0044699)	K00020|1.1186e-78|bfo:BRAFLDRAFT_270300|hypothetical protein; K00020 3-hydroxyisobutyrate dehydrogenase [EC:1.1.1.31] (A)	Valine, leucine and isoleucine degradation (ko00280)
c41487.graph_c0	0.679631	0.423957	normal	0.000994777	1.19902	up	0.297872	0.784309	normal	gi|470525679|ref|XP_004356639.1|	aldehyde dehydrogenase [Acanthamoeba castellanii str. Neff]	Aldehyde dehydrogenase GN=ALDH OS=Enchytraeus buchholzi (Grindal worm) PE=2 SV=1	Energy production and conversion	Molecular Function: oxidoreductase activity (GO:0016491);;	molecular function: catalytic activity (GO:0003824);; biological process: metabolic process (GO:0008152);; biological process: single-organism process (GO:0044699)	K07249|4.21599e-68|cmk:103187113|aldh1a2; aldehyde dehydrogenase 1 family, member A2; K07249 retinal dehydrogenase [EC:1.2.1.36] (A)	Retinol metabolism (ko00830)
c47182.graph_c0	0.0852136	-0.711243	normal	1.86199e-07	1.42845	up	4.09783e-10	2.14715	up	gi|514699003|ref|XP_004997070.1|	NADH:flavin oxidoreductase [Salpingoeca rosetta]	--	--	Molecular Function: oxidoreductase activity (GO:0016491);;	molecular function: catalytic activity (GO:0003824);; biological process: metabolic process (GO:0008152);; biological process: single-organism process (GO:0044699)	--	--
c54460.graph_c0	0.872681	-0.125431	normal	0.00250774	-1.22589	down	0.0299174	-1.09586	normal	gi|281210033|gb|EFA84201.1|	zinc-containing alcohol dehydrogenase [Polysphondylium pallidum PN500]	Alcohol dehydrogenase class-3 GN=adh5 OS=Dictyostelium discoideum (Slime mold) PE=3 SV=1	Secondary metabolites biosynthesis, transport and catabolism	Molecular Function: oxidoreductase activity (GO:0016491);;	molecular function: catalytic activity (GO:0003824);; biological process: metabolic process (GO:0008152);; biological process: single-organism process (GO:0044699)	K00121|5.61708e-114|bmor:733095|alcohol dehydrogenase (EC:1.1.1.2); K00121 S-(hydroxymethyl)glutathione dehydrogenase / alcohol dehydrogenase [EC:1.1.1.284 1.1.1.1] (A)	Glycolysis / Gluconeogenesis (ko00010);; Fatty acid degradation (ko00071);; Tyrosine metabolism (ko00350);; Retinol metabolism (ko00830);; Metabolism of xenobiotics by cytochrome P450 (ko00980);; Drug metabolism - cytochrome P450 (ko00982);; Carbon metabolism (ko01200);; Degradation of aromatic compounds (ko01220)
c53754.graph_c0	--	--	--	5.42506e-05	2.24891	up	0.053834	1.009	normal	gi|678309444|emb|CDW89889.1|	bifunctional protein [Stylonychia lemnae]	Formyltetrahydrofolate synthetase GN=pug OS=Drosophila melanogaster (Fruit fly) PE=1 SV=4	Coenzyme transport and metabolism	Molecular Function: oxidoreductase activity (GO:0016491);;	molecular function: catalytic activity (GO:0003824);; biological process: metabolic process (GO:0008152);; biological process: single-organism process (GO:0044699)	K00288|1.20633e-46|xma:102224500|c-1-tetrahydrofolate synthase, cytoplasmic-like; K00288 methylenetetrahydrofolate dehydrogenase (NADP+) / methenyltetrahydrofolate cyclohydrolase / formyltetrahydrofolate synthetase [EC:1.5.1.5 3.5.4.9 6.3.4.3] (A)	One carbon pool by folate (ko00670)
c19572.graph_c0	0.387806	0.650043	normal	0.000493811	1.62774	up	0.075269	0.986502	normal	gi|514699017|ref|XP_004997077.1|	cinnamyl-alcohol dehydrogenase family/CAD family [Salpingoeca rosetta]	--	Defense mechanisms	Molecular Function: oxidoreductase activity (GO:0016491);;	molecular function: catalytic activity (GO:0003824);; biological process: metabolic process (GO:0008152);; biological process: single-organism process (GO:0044699)	--	--
c32708.graph_c0	--	--	--	0.00117469	1.61742	up	0.69147	0.371034	normal	gi|290980952|ref|XP_002673195.1|	cinnamyl-alcohol dehydrogenase-like protein [Naegleria gruberi]	Sterol-4-alpha-carboxylate 3-dehydrogenase, decarboxylating GN=nsdhl OS=Dictyostelium discoideum (Slime mold) PE=3 SV=1	Defense mechanisms	Molecular Function: oxidoreductase activity (GO:0016491);;	molecular function: catalytic activity (GO:0003824);; biological process: metabolic process (GO:0008152);; biological process: single-organism process (GO:0044699)	--	--
c41859.graph_c0	--	--	--	2.42963e-05	1.78804	up	0.000270477	1.95492	up	gi|470324965|ref|XP_004364330.1|	zinc-binding alcohol dehydrogenase [Capsaspora owczarzaki ATCC 30864]	Probable polyketide synthase 16 GN=pks16 OS=Dictyostelium discoideum (Slime mold) PE=2 SV=1	--	Molecular Function: oxidoreductase activity (GO:0016491);;	molecular function: catalytic activity (GO:0003824);; biological process: metabolic process (GO:0008152);; biological process: single-organism process (GO:0044699)	K00344|6.14616e-76|hgl:101712564|Cryz; crystallin, zeta (quinone reductase); K00344 NADPH2:quinone reductase [EC:1.6.5.5] (A)	--
c53990.graph_c0	0.308757	0.430129	normal	0.013476	-0.735393	normal	0.00244803	-1.1567	down	gi|403340997|gb|EJY69793.1|	hypothetical protein OXYTRI_09466 [Oxytricha trifallax]	--	Energy production and conversion	Molecular Function: oxidoreductase activity (GO:0016491);;	molecular function: catalytic activity (GO:0003824);; biological process: metabolic process (GO:0008152);; biological process: single-organism process (GO:0044699)	--	--
c20167.graph_c0	0.000111446	-1.12516	down	0.000156651	-0.80619	normal	0.31982	0.321975	normal	gi|478254529|gb|ENN74773.1|	hypothetical protein YQE_08646, partial [Dendroctonus ponderosae]	RNA-binding protein Musashi homolog Rbp6 {ECO:0000250|UniProtKB:Q920Q6, ECO:0000303|PubMed:8417324} OS=Drosophila melanogaster (Fruit fly) PE=2 SV=3	RNA processing and modification	Molecular Function: organic cyclic compound binding (GO:0097159);; Molecular Function: heterocyclic compound binding (GO:1901363);;	molecular function: binding (GO:0005488)	K14411|1.4708e-17|hro:HELRODRAFT_73357|hypothetical protein; K14411 RNA-binding protein Musashi (A)	mRNA surveillance pathway (ko03015)
c38024.graph_c0	0.250439	1.04237	normal	5.33578e-05	1.68494	up	0.395853	0.650211	normal	gi|665793950|ref|XP_008544648.1|	PREDICTED: polyadenylate-binding protein 4-like [Microplitis demolitor]	Polyadenylate-binding protein GN=pAbp OS=Drosophila melanogaster (Fruit fly) PE=1 SV=3	--	Molecular Function: organic cyclic compound binding (GO:0097159);; Molecular Function: heterocyclic compound binding (GO:1901363);;	molecular function: binding (GO:0005488)	K13126|1.40761e-116|pbi:103055042|embryonic polyadenylate-binding protein-like; K13126 polyadenylate-binding protein (A)	RNA transport (ko03013);; mRNA surveillance pathway (ko03015);; RNA degradation (ko03018)
c41087.graph_c0	0.00188085	-1.04506	down	1.11587e-07	-1.58845	down	0.272626	-0.544014	normal	gi|678342340|emb|CDW72991.1|	cleavage stimulation factor subunit 2 [Stylonychia lemnae]	Splicing factor U2AF 50 kDa subunit GN=U2af50 OS=Drosophila melanogaster (Fruit fly) PE=1 SV=1	RNA processing and modification	Molecular Function: organic cyclic compound binding (GO:0097159);; Molecular Function: heterocyclic compound binding (GO:1901363);;	molecular function: binding (GO:0005488)	K14407|9.13337e-31|bfo:BRAFLDRAFT_216236|hypothetical protein; K14407 cleavage stimulation factor subunit 2 (A)	mRNA surveillance pathway (ko03015)
c35382.graph_c0	1.79489e-09	-2.01612	down	0.0479975	-0.633602	normal	0.00187686	1.39682	up	gi|403335713|gb|EJY67037.1|	DEAD/DEAH box helicase family protein [Oxytricha trifallax]	ATP-dependent RNA helicase bel OS=Drosophila melanogaster (Fruit fly) PE=1 SV=1	RNA processing and modification	Molecular Function: organic cyclic compound binding (GO:0097159);; Molecular Function: heterocyclic compound binding (GO:1901363);;	molecular function: binding (GO:0005488)	K16911|2.58823e-55|smm:Smp_157800|DEAD box ATP-dependent RNA helicase; K16911 ATP-dependent RNA helicase DDX21 [EC:3.6.4.13] (A)	--
c45015.graph_c0	0.00598194	1.40726	up	0.64139	0.310916	normal	0.043262	-1.0926	normal	gi|403350666|gb|EJY74800.1|	DEAD/DEAH box helicase family protein [Oxytricha trifallax]	Probable ATP-dependent RNA helicase ddx17 GN=ddx17 OS=Dictyostelium discoideum (Slime mold) PE=3 SV=1	RNA processing and modification	Molecular Function: organic cyclic compound binding (GO:0097159);; Molecular Function: heterocyclic compound binding (GO:1901363);;	molecular function: binding (GO:0005488)	K16911|2.68516e-124|tgu:100225471|DDX21; DEAD (Asp-Glu-Ala-Asp) box helicase 21; K16911 ATP-dependent RNA helicase DDX21 [EC:3.6.4.13] (A)	--
c49662.graph_c0	0.633614	-0.315662	normal	0.00059238	1.08333	up	0.000197182	1.40153	up	gi|678309525|emb|CDW89844.1|	UNKNOWN [Stylonychia lemnae]	Origin recognition complex subunit 4 GN=orcD OS=Dictyostelium discoideum (Slime mold) PE=3 SV=1	Replication, recombination and repair	Molecular Function: organic cyclic compound binding (GO:0097159);; Molecular Function: heterocyclic compound binding (GO:1901363);;	molecular function: binding (GO:0005488)	K02606|3.89411e-16|rno:295596|Orc4, Orc4l; origin recognition complex, subunit 4; K02606 origin recognition complex subunit 4 (A)	Cell cycle (ko04110)
c50629.graph_c0	0.35382	-0.492448	normal	5.74748e-05	1.27692	up	1.02645e-05	1.76714	up	gi|403361151|gb|EJY80271.1|	SNF2 family N-terminal domain containing protein [Oxytricha trifallax]	Putative SMARCAL1-like protein GN=C16A3.1 OS=Caenorhabditis elegans PE=3 SV=1	Chromatin structure and dynamics	Molecular Function: organic cyclic compound binding (GO:0097159);; Molecular Function: heterocyclic compound binding (GO:1901363);;	molecular function: binding (GO:0005488)	K14440|3.10139e-77|hro:HELRODRAFT_194392|hypothetical protein; K14440 SWI/SNF-related matrix-associated actin-dependent regulator of chromatin subfamily A-like protein 1 [EC:3.6.4.12] (A)	--
c36971.graph_c0	0.165936	0.975691	normal	3.1686e-05	2.08665	up	0.0614312	1.12108	normal	gi|470521903|ref|XP_004353930.1|	integral membrane protein 1 isoform 5, putative [Acanthamoeba castellanii str. Neff]	Dolichyl-diphosphooligosaccharide--protein glycosyltransferase subunit STT3 GN=stt3 OS=Dictyostelium discoideum (Slime mold) PE=3 SV=1	Posttranslational modification, protein turnover, chaperones	Molecular Function: oligosaccharyl transferase activity (GO:0004576);; Biological Process: protein glycosylation (GO:0006486);; Cellular Component: membrane (GO:0016020);;	molecular function: catalytic activity (GO:0003824);; biological process: metabolic process (GO:0008152);; biological process: cellular process (GO:0009987);; biological process: single-organism process (GO:0044699);; cellular component: membrane (GO:0016020)	K07151|0|api:100168884|dolichyl-diphosphooligosaccharide--protein glycosyltransferase subunit STT3A; K07151 dolichyl-diphosphooligosaccharide--protein glycosyltransferase [EC:2.4.99.18] (A)	N-Glycan biosynthesis (ko00510);; Protein processing in endoplasmic reticulum (ko04141)
c24625.graph_c0	0.268475	-0.375488	normal	4.1574e-11	-1.69042	down	3.47626e-05	-1.31393	down	gi|403334977|gb|EJY66659.1|	RNA polymerase III [Oxytricha trifallax]	DNA-directed RNA polymerase III subunit RPC2 GN=RpIII128 OS=Drosophila melanogaster (Fruit fly) PE=2 SV=2	Transcription	Molecular Function: nucleotidyltransferase activity (GO:0016779);; Molecular Function: organic cyclic compound binding (GO:0097159);; Molecular Function: heterocyclic compound binding (GO:1901363);;	molecular function: catalytic activity (GO:0003824);; biological process: metabolic process (GO:0008152);; molecular function: binding (GO:0005488)	K03021|0|tgu:100231089|POLR3B; polymerase (RNA) III (DNA directed) polypeptide B; K03021 DNA-directed RNA polymerase III subunit RPC2 [EC:2.7.7.6] (A)	Purine metabolism (ko00230);; Pyrimidine metabolism (ko00240);; RNA polymerase (ko03020);; Cytosolic DNA-sensing pathway (ko04623)
c43122.graph_c0	1.58559e-05	-1.28211	down	0.0474463	-0.519355	normal	0.0112299	0.763974	normal	gi|403366431|gb|EJY83017.1|	Peptidyl-prolyl cis-trans isomerase, cyclophilin-type family protein [Oxytricha trifallax]	Peptidyl-prolyl cis-trans isomerase 3 GN=cyn-3 OS=Caenorhabditis elegans PE=1 SV=1	Posttranslational modification, protein turnover, chaperones	Molecular Function: nucleotidyltransferase activity (GO:0016779);; Molecular Function: isomerase activity (GO:0016853);; Biological Process: cellular protein metabolic process (GO:0044267);;	molecular function: catalytic activity (GO:0003824);; biological process: metabolic process (GO:0008152);; biological process: cellular process (GO:0009987)	K05864|3.88422e-49|nve:NEMVE_v1g103092|hypothetical protein; K05864 peptidyl-prolyl isomerase D [EC:5.2.1.8] (A)	--
c49246.graph_c0	0.964333	0.0273071	normal	5.30292e-06	-1.04776	down	0.000278724	-1.06928	down	gi|359817571|gb|AEV66615.1|	mitochondrial RNA polymerase [Oxytricha trifallax]	--	--	Molecular Function: nucleotidyltransferase activity (GO:0016779);;	molecular function: catalytic activity (GO:0003824);; biological process: metabolic process (GO:0008152)	K10908|3.3687e-142|mdo:100024662|POLRMT; polymerase (RNA) mitochondrial (DNA directed); K10908 DNA-directed RNA polymerase, mitochondrial [EC:2.7.7.6] (A)	--
c39643.graph_c0	0.738089	-0.204998	normal	3.67829e-11	1.77317	up	1.71397e-11	1.98199	up	gi|403350390|gb|EJY74655.1|	ATPase, AAA family protein [Oxytricha trifallax]	Probable replication factor C subunit 4 GN=rfc4 OS=Dictyostelium discoideum (Slime mold) PE=3 SV=1	Replication, recombination and repair	Molecular Function: nucleotide binding (GO:0000166);; Molecular Function: transferase activity (GO:0016740);;	molecular function: binding (GO:0005488);; molecular function: catalytic activity (GO:0003824);; biological process: metabolic process (GO:0008152)	K10755|6.93877e-94|spu:582287|replication factor C subunit 4-like; K10755 replication factor C subunit 2/4 (A)	DNA replication (ko03030);; Nucleotide excision repair (ko03420);; Mismatch repair (ko03430)
c37060.graph_c0	0.174666	1.19141	normal	2.01603e-09	2.66606	up	0.0240667	1.48438	normal	gi|694543908|ref|XP_009497753.1|	adenylyl-sulfate kinase [Fonticula alba]	Adenylyl-sulfate kinase OS=Urechis caupo (Innkeeper worm) PE=2 SV=1	Inorganic ion transport and metabolism	Molecular Function: nucleotide binding (GO:0000166);; Molecular Function: sulfate adenylyltransferase (ATP) activity (GO:0004781);; Biological Process: sulfur compound metabolic process (GO:0006790);; Molecular Function: kinase activity (GO:0016301);;	molecular function: binding (GO:0005488);; molecular function: catalytic activity (GO:0003824);; biological process: metabolic process (GO:0008152);; biological process: cellular process (GO:0009987)	K13811|2.90149e-75|xma:102236981|bifunctional 3'-phosphoadenosine 5'-phosphosulfate synthase 1-like; K13811 3'-phosphoadenosine 5'-phosphosulfate synthase [EC:2.7.7.4 2.7.1.25] (A)	Purine metabolism (ko00230);; Selenocompound metabolism (ko00450);; Sulfur metabolism (ko00920)
c40448.graph_c0	0.142276	0.953731	normal	8.4663e-05	1.26758	up	0.649138	0.322173	normal	gi|470423489|ref|XP_004337603.1|	ribosomal protein L23, putative [Acanthamoeba castellanii str. Neff]	60S ribosomal protein L23a 1 GN=rpl-25.1 OS=Caenorhabditis elegans PE=3 SV=1	Translation, ribosomal structure and biogenesis	Molecular Function: nucleotide binding (GO:0000166);; Molecular Function: structural constituent of ribosome (GO:0003735);; Cellular Component: ribosome (GO:0005840);; Biological Process: translation (GO:0006412);;	molecular function: binding (GO:0005488);; molecular function: structural molecule activity (GO:0005198);; cellular component: cell (GO:0005623);; cellular component: macromolecular complex (GO:0032991);; cellular component: organelle (GO:0043226);; cellular component: cell part (GO:0044464);; biological process: metabolic process (GO:0008152);; biological process: cellular process (GO:0009987)	K02893|7.66867e-62|cin:100176316|60S ribosomal protein L23a-like; K02893 large subunit ribosomal protein L23Ae (A)	Ribosome (ko03010)
c40579.graph_c0	0.337679	0.720046	normal	0.000928369	1.41612	up	0.284995	0.707457	normal	gi|330846316|ref|XP_003294985.1|	hypothetical protein DICPUDRAFT_59352 [Dictyostelium purpureum]	40S ribosomal protein S24 GN=rps24 OS=Dictyostelium discoideum (Slime mold) PE=3 SV=1	Translation, ribosomal structure and biogenesis	Molecular Function: nucleotide binding (GO:0000166);; Molecular Function: structural constituent of ribosome (GO:0003735);; Cellular Component: ribosome (GO:0005840);; Biological Process: translation (GO:0006412);;	molecular function: binding (GO:0005488);; molecular function: structural molecule activity (GO:0005198);; cellular component: cell (GO:0005623);; cellular component: macromolecular complex (GO:0032991);; cellular component: organelle (GO:0043226);; cellular component: cell part (GO:0044464);; biological process: metabolic process (GO:0008152);; biological process: cellular process (GO:0009987)	K02974|5.98538e-37|spu:592738|40S ribosomal protein S24-like; K02974 small subunit ribosomal protein S24e (A)	Ribosome (ko03010)
c19612.graph_c1	0.163372	-0.650029	normal	2.29849e-05	-1.47284	down	0.050314	-0.82397	normal	gi|403376884|gb|EJY88428.1|	Protein kinase domain containing protein [Oxytricha trifallax]	Calcium-dependent protein kinase 2 GN=CPK2 OS=Plasmodium falciparum (isolate K1 / Thailand) PE=1 SV=3	Signal transduction mechanisms	Molecular Function: nucleotide binding (GO:0000166);; Molecular Function: protein serine/threonine kinase activity (GO:0004674);; Biological Process: phosphorylation (GO:0016310);; Molecular Function: metal ion binding (GO:0046872);;	molecular function: binding (GO:0005488);; molecular function: catalytic activity (GO:0003824);; biological process: metabolic process (GO:0008152);; biological process: cellular process (GO:0009987)	K05869|4.00659e-33|fab:101818551|calcium/calmodulin-dependent protein kinase type IV-like; K05869 calcium/calmodulin-dependent protein kinase IV [EC:2.7.11.17] (A)	Calcium signaling pathway (ko04020)
c27368.graph_c0	4.50302e-05	-1.64327	down	2.69542e-07	-1.9985	down	0.630721	-0.368828	normal	gi|403342477|gb|EJY70559.1|	Protein kinase domain containing protein [Oxytricha trifallax]	Calcium-dependent protein kinase 1 GN=CPK1 OS=Plasmodium falciparum (isolate K1 / Thailand) PE=1 SV=2	Signal transduction mechanisms	Molecular Function: nucleotide binding (GO:0000166);; Molecular Function: protein serine/threonine kinase activity (GO:0004674);; Biological Process: phosphorylation (GO:0016310);; Molecular Function: metal ion binding (GO:0046872);;	molecular function: binding (GO:0005488);; molecular function: catalytic activity (GO:0003824);; biological process: metabolic process (GO:0008152);; biological process: cellular process (GO:0009987)	K08794|1.37769e-34|spu:582789|calcium/calmodulin-dependent protein kinase type 1D-like; K08794 calcium/calmodulin-dependent protein kinase I [EC:2.7.11.17] (A)	--
c50847.graph_c0	1.52357e-07	1.7257	up	0.0218614	0.792944	normal	0.00487827	-0.93159	normal	gi|678334662|emb|CDW76939.1|	protein kinase domain protein [Stylonychia lemnae]	RAC family serine/threonine-protein kinase homolog GN=pkbA OS=Dictyostelium discoideum (Slime mold) PE=1 SV=1	Signal transduction mechanisms	Molecular Function: nucleotide binding (GO:0000166);; Molecular Function: protein serine/threonine kinase activity (GO:0004674);; Biological Process: phosphorylation (GO:0016310);; Molecular Function: anion binding (GO:0043168);;	molecular function: binding (GO:0005488);; molecular function: catalytic activity (GO:0003824);; biological process: metabolic process (GO:0008152);; biological process: cellular process (GO:0009987)	K04688|6.79926e-80|lgi:LOTGIDRAFT_134650|hypothetical protein; K04688 p70 ribosomal S6 kinase [EC:2.7.11.1] (A)	mTOR signaling pathway (ko04150);; TGF-beta signaling pathway (ko04350)
c20379.graph_c1	0.570663	-0.413016	normal	5.58108e-18	2.46633	up	1.0417e-15	2.88587	up	gi|321461440|gb|EFX72472.1|	hypothetical protein DAPPUDRAFT_308251 [Daphnia pulex]	Aurora kinase {ECO:0000312|EMBL:BAJ10384.1} OS=Patiria pectinifera (Starfish) PE=1 SV=1	Cell cycle control, cell division, chromosome partitioning	Molecular Function: nucleotide binding (GO:0000166);; Molecular Function: protein serine/threonine kinase activity (GO:0004674);; Biological Process: phosphorylation (GO:0016310);;	molecular function: binding (GO:0005488);; molecular function: catalytic activity (GO:0003824);; biological process: metabolic process (GO:0008152);; biological process: cellular process (GO:0009987)	K11479|1.38014e-41|api:100163812|aurora kinase C-like; K11479 aurora kinase B [EC:2.7.11.1] (A)	--
c36001.graph_c0	0.00744263	-0.850766	normal	2.37306e-05	-1.02198	down	0.648612	-0.167029	normal	gi|699240231|ref|XP_009857951.1|	PREDICTED: casein kinase 2 alpha subunit isoform X1 [Ciona intestinalis]	Casein kinase II subunit alpha GN=kin-3 OS=Caenorhabditis elegans PE=1 SV=1	--	Molecular Function: nucleotide binding (GO:0000166);; Molecular Function: protein serine/threonine kinase activity (GO:0004674);; Biological Process: phosphorylation (GO:0016310);;	molecular function: binding (GO:0005488);; molecular function: catalytic activity (GO:0003824);; biological process: metabolic process (GO:0008152);; biological process: cellular process (GO:0009987)	K03097|8.18023e-101|acs:100566597|casein kinase II subunit alpha-like; K03097 casein kinase II subunit alpha [EC:2.7.11.1] (A)	Ribosome biogenesis in eukaryotes (ko03008);; Wnt signaling pathway (ko04310);; Adherens junction (ko04520);; Tight junction (ko04530);; Herpes simplex infection (ko05168)
c38584.graph_c0	2.50885e-05	-1.19353	down	7.07233e-07	-1.1421	down	0.88942	0.0559184	normal	gi|403353612|gb|EJY76347.1|	Serine/threonine protein kinase [Oxytricha trifallax]	Cyclin-dependent kinase 5 homolog GN=cdk5 OS=Dictyostelium discoideum (Slime mold) PE=2 SV=2	General function prediction only	Molecular Function: nucleotide binding (GO:0000166);; Molecular Function: protein serine/threonine kinase activity (GO:0004674);; Biological Process: phosphorylation (GO:0016310);;	molecular function: binding (GO:0005488);; molecular function: catalytic activity (GO:0003824);; biological process: metabolic process (GO:0008152);; biological process: cellular process (GO:0009987)	K02206|3.08092e-116|xla:432036|uncharacterized protein MGC81499; K02206 cyclin-dependent kinase 2 [EC:2.7.11.22] (A)	FoxO signaling pathway (ko04068);; Cell cycle (ko04110);; Oocyte meiosis (ko04114);; p53 signaling pathway (ko04115);; Progesterone-mediated oocyte maturation (ko04914);; Herpes simplex infection (ko05168)
c47576.graph_c0	0.446675	0.3465	normal	3.47811e-06	1.4345	up	0.00112419	1.08871	up	gi|678339135|emb|CDW74610.1|	protein kinase domain containing protein [Stylonychia lemnae]	Serine/threonine-protein kinase sgk-1 {ECO:0000250|UniProtKB:O00141, ECO:0000303|PubMed:15068796} OS=Caenorhabditis elegans PE=1 SV=1	--	Molecular Function: nucleotide binding (GO:0000166);; Molecular Function: protein serine/threonine kinase activity (GO:0004674);; Biological Process: phosphorylation (GO:0016310);;	molecular function: binding (GO:0005488);; molecular function: catalytic activity (GO:0003824);; biological process: metabolic process (GO:0008152);; biological process: cellular process (GO:0009987)	K04688|3.92094e-70|tad:TRIADDRAFT_28822|hypothetical protein; K04688 p70 ribosomal S6 kinase [EC:2.7.11.1] (A)	mTOR signaling pathway (ko04150);; TGF-beta signaling pathway (ko04350)
c51758.graph_c1	0.0134356	-0.734324	normal	1.72213e-12	-1.70378	down	0.00108559	-0.96715	normal	gi|586740015|gb|EAR86254.2|	Serine/Threonine kinase domain protein [Tetrahymena thermophila SB210]	Serine/threonine-protein kinase par-1 {ECO:0000250|UniProtKB:Q9TW45, ECO:0000312|EMBL:CAP25402.1} GN=par-1 OS=Caenorhabditis briggsae PE=3 SV=1	General function prediction only	Molecular Function: nucleotide binding (GO:0000166);; Molecular Function: protein serine/threonine kinase activity (GO:0004674);; Biological Process: phosphorylation (GO:0016310);;	molecular function: binding (GO:0005488);; molecular function: catalytic activity (GO:0003824);; biological process: metabolic process (GO:0008152);; biological process: cellular process (GO:0009987)	K08286|3.24738e-42|dme:Dmel_CG17216|KP78b; CG17216 gene product from transcript CG17216-RB (EC:2.7.11.-); K08286 protein-serine/threonine kinase [EC:2.7.11.-] (A)	--
c44958.graph_c1	0.915669	-0.102642	normal	0.00781213	1.16427	up	0.00420669	1.26978	up	gi|123496113|ref|XP_001326893.1|	CAMK family protein kinase [Trichomonas vaginalis G3]	Probable serine/threonine-protein kinase nek3 GN=nek3 OS=Dictyostelium discoideum (Slime mold) PE=3 SV=1	Defense mechanisms	Molecular Function: nucleotide binding (GO:0000166);; Molecular Function: protein kinase activity (GO:0004672);; Biological Process: phosphorylation (GO:0016310);; Molecular Function: transferase activity, transferring glycosyl groups (GO:0016757);;	molecular function: binding (GO:0005488);; molecular function: catalytic activity (GO:0003824);; biological process: metabolic process (GO:0008152);; biological process: cellular process (GO:0009987)	K08857|4.09346e-20|myb:102242948|NEK2; NIMA-related kinase 2; K08857 NIMA (never in mitosis gene a)-related kinase [EC:2.7.11.1] (A)	--
c24544.graph_c0	0.796502	0.146831	normal	5.20892e-05	1.11854	up	0.00293435	0.973122	normal	gi|403361627|gb|EJY80515.1|	putative serine/threonine-protein kinase nek2 [Oxytricha trifallax]	Probable serine/threonine-protein kinase nek2 GN=nek2 OS=Dictyostelium discoideum (Slime mold) PE=1 SV=1	Defense mechanisms	Molecular Function: nucleotide binding (GO:0000166);; Molecular Function: protein kinase activity (GO:0004672);; Biological Process: phosphorylation (GO:0016310);; Molecular Function: transferase activity, transferring acyl groups (GO:0016746);;	molecular function: binding (GO:0005488);; molecular function: catalytic activity (GO:0003824);; biological process: metabolic process (GO:0008152);; biological process: cellular process (GO:0009987)	K08857|1.12877e-110|nve:NEMVE_v1g116843|hypothetical protein; K08857 NIMA (never in mitosis gene a)-related kinase [EC:2.7.11.1] (A)	--
c28053.graph_c1	0.173509	1.37245	normal	0.00142366	1.59539	up	0.834747	0.224391	normal	gi|735849029|dbj|GAM28828.1|	hypothetical protein SAMD00019534_120040 [Acytostelium subglobosum LB1]	RAC family serine/threonine-protein kinase homolog GN=pkbA OS=Dictyostelium discoideum (Slime mold) PE=1 SV=1	Signal transduction mechanisms	Molecular Function: nucleotide binding (GO:0000166);; Molecular Function: protein kinase activity (GO:0004672);; Biological Process: phosphorylation (GO:0016310);; Molecular Function: anion binding (GO:0043168);;	molecular function: binding (GO:0005488);; molecular function: catalytic activity (GO:0003824);; biological process: metabolic process (GO:0008152);; biological process: cellular process (GO:0009987)	K04456|1.60499e-57|hmg:100210496|akt3; v-akt murine thymoma viral oncogene homolog 3 (protein kinase B, gamma); K04456 RAC serine/threonine-protein kinase [EC:2.7.11.1] (A)	FoxO signaling pathway (ko04068);; mTOR signaling pathway (ko04150);; Jak-STAT signaling pathway (ko04630)
c36925.graph_c0	--	--	--	1.95577e-05	1.96196	up	0.00067241	2.17258	up	gi|470504858|ref|XP_004348513.1|	protein kinase domain containing protein, partial [Acanthamoeba castellanii str. Neff]	Probable serine/threonine-protein kinase DDB_G0288795 GN=DDB_G0288795 OS=Dictyostelium discoideum (Slime mold) PE=2 SV=1	--	Molecular Function: nucleotide binding (GO:0000166);; Molecular Function: protein kinase activity (GO:0004672);; Biological Process: phosphorylation (GO:0016310);; Molecular Function: anion binding (GO:0043168);;	molecular function: binding (GO:0005488);; molecular function: catalytic activity (GO:0003824);; biological process: metabolic process (GO:0008152);; biological process: cellular process (GO:0009987)	K13304|2.65062e-113|api:100163770|serine/threonine-protein kinase Sgk2-like; K13304 serum/glucocorticoid-regulated kinase 3 [EC:2.7.11.1] (A)	FoxO signaling pathway (ko04068)
c45390.graph_c0	--	--	--	0.0068542	1.35443	up	0.0973199	1.03893	normal	gi|3858883|gb|AAD09141.1|	myosin I heavy chain kinase [Acanthamoeba castellanii]	Serine/threonine-protein kinase pakC {ECO:0000303|PubMed:15483055} GN=pakC OS=Dictyostelium discoideum (Slime mold) PE=1 SV=2	Signal transduction mechanisms	Molecular Function: nucleotide binding (GO:0000166);; Molecular Function: protein kinase activity (GO:0004672);; Biological Process: phosphorylation (GO:0016310);; Molecular Function: anion binding (GO:0043168);;	molecular function: binding (GO:0005488);; molecular function: catalytic activity (GO:0003824);; biological process: metabolic process (GO:0008152);; biological process: cellular process (GO:0009987)	K04409|4.80314e-86|bmor:101743777|serine/threonine-protein kinase PAK 1-like; K04409 p21-activated kinase 1 [EC:2.7.11.1] (A)	--
c48618.graph_c0	0.369979	0.847056	normal	0.00277913	1.60189	up	0.301984	0.762833	normal	gi|3858883|gb|AAD09141.1|	myosin I heavy chain kinase [Acanthamoeba castellanii]	Serine/threonine-protein kinase pak-1 GN=pak-1 OS=Caenorhabditis elegans PE=1 SV=2	Signal transduction mechanisms	Molecular Function: nucleotide binding (GO:0000166);; Molecular Function: protein kinase activity (GO:0004672);; Biological Process: phosphorylation (GO:0016310);; Molecular Function: anion binding (GO:0043168);;	molecular function: binding (GO:0005488);; molecular function: catalytic activity (GO:0003824);; biological process: metabolic process (GO:0008152);; biological process: cellular process (GO:0009987)	K04409|3.36874e-91|lgi:LOTGIDRAFT_179393|hypothetical protein; K04409 p21-activated kinase 1 [EC:2.7.11.1] (A)	--
c24632.graph_c0	0.110988	-0.581011	normal	1.56568e-10	-1.75651	down	0.000316834	-1.17521	down	gi|678335135|emb|CDW76694.1|	protein kinase domain containing protein [Stylonychia lemnae]	Probable serine/threonine-protein kinase nek3 GN=nek3 OS=Dictyostelium discoideum (Slime mold) PE=3 SV=1	Cell cycle control, cell division, chromosome partitioning	Molecular Function: nucleotide binding (GO:0000166);; Molecular Function: protein kinase activity (GO:0004672);; Biological Process: phosphorylation (GO:0016310);;	molecular function: binding (GO:0005488);; molecular function: catalytic activity (GO:0003824);; biological process: metabolic process (GO:0008152);; biological process: cellular process (GO:0009987)	K08857|2.31847e-57|mcc:694345|NEK1; NIMA (never in mitosis gene a)-related kinase 1; K08857 NIMA (never in mitosis gene a)-related kinase [EC:2.7.11.1] (A)	--
c24761.graph_c0	0.268065	-0.379378	normal	8.36011e-06	-1.11034	down	0.0137851	-0.728451	normal	gi|586734834|gb|EAR99285.2|	plant dual-specificity MAP kinase kinase family domain protein [Tetrahymena thermophila SB210]	Probable serine/threonine-protein kinase nek2 GN=nek2 OS=Dictyostelium discoideum (Slime mold) PE=1 SV=1	General function prediction only	Molecular Function: nucleotide binding (GO:0000166);; Molecular Function: protein kinase activity (GO:0004672);; Biological Process: phosphorylation (GO:0016310);;	molecular function: binding (GO:0005488);; molecular function: catalytic activity (GO:0003824);; biological process: metabolic process (GO:0008152);; biological process: cellular process (GO:0009987)	K08857|6.24244e-49|dre:556002|nek1, si:dkey-15j16.5, si:dkey-171k19.5, wu:fc38c08; NIMA (never in mitosis gene a)-related kinase 1; K08857 NIMA (never in mitosis gene a)-related kinase [EC:2.7.11.1] (A)	--
c31972.graph_c0	0.436064	0.353658	normal	1.37938e-06	1.34308	up	0.00406716	0.990426	normal	gi|118367079|ref|XP_001016755.1|	Protein kinase domain containing protein [Tetrahymena thermophila]	Probable serine/threonine-protein kinase PLK GN=PLK OS=Dictyostelium discoideum (Slime mold) PE=3 SV=1	Cell cycle control, cell division, chromosome partitioning	Molecular Function: nucleotide binding (GO:0000166);; Molecular Function: protein kinase activity (GO:0004672);; Biological Process: phosphorylation (GO:0016310);;	molecular function: binding (GO:0005488);; molecular function: catalytic activity (GO:0003824);; biological process: metabolic process (GO:0008152);; biological process: cellular process (GO:0009987)	K06631|3.10148e-79|nvi:100120719|NV_30481, Plk1; serine/threonine-protein kinase polo; K06631 polo-like kinase 1 [EC:2.7.11.21] (A)	FoxO signaling pathway (ko04068)
c33946.graph_c0	0.0344896	-0.674253	normal	0.000506015	-1.00997	down	0.376416	-0.335818	normal	gi|403330969|gb|EJY64402.1|	hypothetical protein OXYTRI_15567 [Oxytricha trifallax]	Serine/threonine-protein kinase par-1 {ECO:0000250|UniProtKB:Q9TW45, ECO:0000312|EMBL:CAP25402.1} GN=par-1 OS=Caenorhabditis briggsae PE=3 SV=1	General function prediction only	Molecular Function: nucleotide binding (GO:0000166);; Molecular Function: protein kinase activity (GO:0004672);; Biological Process: phosphorylation (GO:0016310);;	molecular function: binding (GO:0005488);; molecular function: catalytic activity (GO:0003824);; biological process: metabolic process (GO:0008152);; biological process: cellular process (GO:0009987)	K16311|9.43101e-59|fab:101821284|SIK3; SIK family kinase 3; K19009 serine/threonine-protein kinase SIK3 [EC:2.7.11.1] (A)	--
c34202.graph_c0	0.00164408	-1.02425	down	0.0567424	-0.511341	normal	0.145286	0.513999	normal	gi|586729884|gb|EAR83720.2|	plant dual-specificity MAP kinase kinase family domain protein [Tetrahymena thermophila SB210]	Probable serine/threonine-protein kinase nek3 GN=nek3 OS=Dictyostelium discoideum (Slime mold) PE=3 SV=1	General function prediction only	Molecular Function: nucleotide binding (GO:0000166);; Molecular Function: protein kinase activity (GO:0004672);; Biological Process: phosphorylation (GO:0016310);;	molecular function: binding (GO:0005488);; molecular function: catalytic activity (GO:0003824);; biological process: metabolic process (GO:0008152);; biological process: cellular process (GO:0009987)	K08857|9.49767e-58|bom:102283783|serine/threonine-protein kinase Nek5-like; K08857 NIMA (never in mitosis gene a)-related kinase [EC:2.7.11.1] (A)	--
c41302.graph_c0	1	0.00333037	normal	5.56562e-06	1.07317	up	2.66357e-05	1.07421	up	gi|221130719|ref|XP_002162015.1|	PREDICTED: cyclin-dependent kinase 2-like [Hydra vulgaris]	Cyclin-dependent kinase 5 homolog GN=cdk5 OS=Dictyostelium discoideum (Slime mold) PE=2 SV=2	General function prediction only	Molecular Function: nucleotide binding (GO:0000166);; Molecular Function: protein kinase activity (GO:0004672);; Biological Process: phosphorylation (GO:0016310);;	molecular function: binding (GO:0005488);; molecular function: catalytic activity (GO:0003824);; biological process: metabolic process (GO:0008152);; biological process: cellular process (GO:0009987)	K02206|1.36787e-122|hmg:100212745|cyclin-dependent kinase 2-like; K02206 cyclin-dependent kinase 2 [EC:2.7.11.22] (A)	FoxO signaling pathway (ko04068)
c45230.graph_c0	0.50408	-0.234754	normal	9.91222e-05	0.870135	normal	8.35e-06	1.10985	up	gi|145551749|ref|XP_001461551.1|	hypothetical protein [Paramecium tetraurelia strain d4-2]	Probable serine/threonine-protein kinase nek3 GN=nek3 OS=Dictyostelium discoideum (Slime mold) PE=3 SV=1	Defense mechanisms	Molecular Function: nucleotide binding (GO:0000166);; Molecular Function: protein kinase activity (GO:0004672);; Biological Process: phosphorylation (GO:0016310);;	molecular function: binding (GO:0005488);; molecular function: catalytic activity (GO:0003824);; biological process: metabolic process (GO:0008152);; biological process: cellular process (GO:0009987)	K08857|8.42612e-45|aqu:100639181|uncharacterized LOC100639181; K08857 NIMA (never in mitosis gene a)-related kinase [EC:2.7.11.1] (A)	--
c50107.graph_c0	0.845732	-0.108339	normal	0.00031629	-1.06286	down	0.0125223	-0.954639	normal	gi|403368372|gb|EJY84018.1|	Protein kinase domain containing protein [Oxytricha trifallax]	Probable serine/threonine-protein kinase nek3 GN=nek3 OS=Dictyostelium discoideum (Slime mold) PE=3 SV=1	General function prediction only	Molecular Function: nucleotide binding (GO:0000166);; Molecular Function: protein kinase activity (GO:0004672);; Biological Process: phosphorylation (GO:0016310);;	molecular function: binding (GO:0005488);; molecular function: catalytic activity (GO:0003824);; biological process: metabolic process (GO:0008152);; biological process: cellular process (GO:0009987)	K08857|1.54855e-56|ola:101160722|serine/threonine-protein kinase Nek1-like; K08857 NIMA (never in mitosis gene a)-related kinase [EC:2.7.11.1] (A)	--
c50490.graph_c0	0.268383	0.394574	normal	1.56431e-08	1.30643	up	0.000784156	0.913806	normal	gi|403375071|gb|EJY87504.1|	hypothetical protein OXYTRI_02659 [Oxytricha trifallax]	Serine/threonine-protein kinase par-1 {ECO:0000303|PubMed:7758115, ECO:0000312|EMBL:CAB54263.1} OS=Caenorhabditis elegans PE=1 SV=1	Signal transduction mechanisms	Molecular Function: nucleotide binding (GO:0000166);; Molecular Function: protein kinase activity (GO:0004672);; Biological Process: phosphorylation (GO:0016310);;	molecular function: binding (GO:0005488);; molecular function: catalytic activity (GO:0003824);; biological process: metabolic process (GO:0008152);; biological process: cellular process (GO:0009987)	K08798|3.04087e-59|cmk:103191048|serine/threonine-protein kinase MARK2-like; K08798 MAP/microtubule affinity-regulating kinase [EC:2.7.11.1] (A)	--
c51793.graph_c0	3.5856e-05	-1.18275	down	0.068406	-0.521791	normal	0.0572948	0.662148	normal	gi|403349626|gb|EJY74252.1|	Serine/threonine-protein kinase, putative [Oxytricha trifallax]	Probable serine/threonine-protein kinase nek3 GN=nek3 OS=Dictyostelium discoideum (Slime mold) PE=3 SV=1	General function prediction only	Molecular Function: nucleotide binding (GO:0000166);; Molecular Function: protein kinase activity (GO:0004672);; Biological Process: phosphorylation (GO:0016310);;	molecular function: binding (GO:0005488);; molecular function: catalytic activity (GO:0003824);; biological process: metabolic process (GO:0008152);; biological process: cellular process (GO:0009987)	K08857|1.10971e-52|ola:101160722|serine/threonine-protein kinase Nek1-like; K08857 NIMA (never in mitosis gene a)-related kinase [EC:2.7.11.1] (A)	--
c52803.graph_c0	0.034083	-0.624588	normal	6.71841e-06	-1.19455	down	0.106546	-0.569072	normal	gi|586729884|gb|EAR83720.2|	plant dual-specificity MAP kinase kinase family domain protein [Tetrahymena thermophila SB210]	Probable serine/threonine-protein kinase nek2 GN=nek2 OS=Dictyostelium discoideum (Slime mold) PE=1 SV=1	General function prediction only	Molecular Function: nucleotide binding (GO:0000166);; Molecular Function: protein kinase activity (GO:0004672);; Biological Process: phosphorylation (GO:0016310);;	molecular function: binding (GO:0005488);; molecular function: catalytic activity (GO:0003824);; biological process: metabolic process (GO:0008152);; biological process: cellular process (GO:0009987)	K08857|8.81461e-66|bfo:BRAFLDRAFT_204870|hypothetical protein; K08857 NIMA (never in mitosis gene a)-related kinase [EC:2.7.11.1] (A)	--
c53808.graph_c0	0.416278	-0.297266	normal	1.34621e-08	-1.27498	down	0.000427373	-0.973772	normal	gi|586729884|gb|EAR83720.2|	plant dual-specificity MAP kinase kinase family domain protein [Tetrahymena thermophila SB210]	Probable serine/threonine-protein kinase nek2 GN=nek2 OS=Dictyostelium discoideum (Slime mold) PE=1 SV=1	General function prediction only	Molecular Function: nucleotide binding (GO:0000166);; Molecular Function: protein kinase activity (GO:0004672);; Biological Process: phosphorylation (GO:0016310);;	molecular function: binding (GO:0005488);; molecular function: catalytic activity (GO:0003824);; biological process: metabolic process (GO:0008152);; biological process: cellular process (GO:0009987)	K08857|1.76415e-61|mdo:100020318|NEK4; NIMA-related kinase 4; K08857 NIMA (never in mitosis gene a)-related kinase [EC:2.7.11.1] (A)	--
c53922.graph_c0	0.027792	-0.791273	normal	6.85046e-07	-1.51407	down	0.0981981	-0.721392	normal	gi|403364851|gb|EJY82202.1|	Casein kinase (Serine/threonine/tyrosine protein kinase) [Oxytricha trifallax]	Casein kinase I OS=Toxoplasma gondii PE=2 SV=1	Signal transduction mechanisms	Molecular Function: nucleotide binding (GO:0000166);; Molecular Function: protein kinase activity (GO:0004672);; Biological Process: phosphorylation (GO:0016310);;	molecular function: binding (GO:0005488);; molecular function: catalytic activity (GO:0003824);; biological process: metabolic process (GO:0008152);; biological process: cellular process (GO:0009987)	--	--
c41318.graph_c0	2.11207e-26	2.6697	up	0.877847	-0.0459673	normal	7.16216e-29	-2.7113	down	gi|403346506|gb|EJY72651.1|	S-adenosylmethionine synthase [Oxytricha trifallax]	S-adenosylmethionine synthase GN=metK OS=Dictyostelium discoideum (Slime mold) PE=1 SV=1	Coenzyme transport and metabolism	Molecular Function: nucleotide binding (GO:0000166);; Molecular Function: protein binding (GO:0005515);; Molecular Function: transferase activity (GO:0016740);; Biological Process: lipid storage (GO:0019915);; Biological Process: secretion by cell (GO:0032940);; Biological Process: positive regulation of growth rate (GO:0040010);; Biological Process: positive regulation of locomotion (GO:0040017)…	molecular function: binding (GO:0005488);; molecular function: catalytic activity (GO:0003824);; biological process: metabolic process (GO:0008152);; biological process: localization (GO:0051179);; biological process: biological regulation (GO:0065007);; biological process: cellular process (GO:0009987);; biological process: single-organism process (GO:0044699);; biological process: reproductive …	K00789|5.37421e-146|bfo:BRAFLDRAFT_78381|hypothetical protein; K00789 S-adenosylmethionine synthetase [EC:2.5.1.6] (A)	Cysteine and methionine metabolism (ko00270);; Biosynthesis of amino acids (ko01230)
c46567.graph_c0	0.140401	0.917307	normal	3.55723e-09	2.03642	up	0.0306492	1.12742	normal	gi|281204153|gb|EFA78349.1|	myosin IC [Polysphondylium pallidum PN500]	Myosin IC heavy chain GN=myoC OS=Dictyostelium discoideum (Slime mold) PE=3 SV=2	Cytoskeleton	Molecular Function: nucleotide binding (GO:0000166);; Molecular Function: nucleoside-triphosphatase activity (GO:0017111);; Cellular Component: intracellular organelle (GO:0043229);;	molecular function: binding (GO:0005488);; molecular function: catalytic activity (GO:0003824);; biological process: metabolic process (GO:0008152);; cellular component: cell (GO:0005623);; cellular component: organelle (GO:0043226);; cellular component: cell part (GO:0044464)	K10356|0|tru:101071598|unconventional myosin-Ie-like; K10356 myosin I (A)	--
c32914.graph_c0	--	--	--	0.000880776	1.90207	up	0.480118	0.598015	normal	gi|470297311|ref|XP_004345586.1|	vacuolar protein sorting factor 4B [Capsaspora owczarzaki ATCC 30864]	Vacuolar protein sorting-associated protein 4 GN=vps4 OS=Dictyostelium discoideum (Slime mold) PE=3 SV=1	Posttranslational modification, protein turnover, chaperones	Molecular Function: nucleotide binding (GO:0000166);; Molecular Function: nucleoside-triphosphatase activity (GO:0017111);;	molecular function: binding (GO:0005488);; molecular function: catalytic activity (GO:0003824);; biological process: metabolic process (GO:0008152)	K12196|4.92454e-175|tsp:Tsp_05353|vacuolar protein sorting-associating protein 4A; K12196 vacuolar protein-sorting-associated protein 4 (A)	Endocytosis (ko04144)
c47709.graph_c0	0.292574	-0.818077	normal	0.0375443	1.00145	normal	0.00143846	1.82292	up	gi|678320296|emb|CDW84308.1|	fidgetin-like protein 1-like [Stylonychia lemnae]	Fidgetin-like protein 1 GN=figl-1 OS=Caenorhabditis briggsae PE=3 SV=1	Posttranslational modification, protein turnover, chaperones	Molecular Function: nucleotide binding (GO:0000166);; Molecular Function: nucleoside-triphosphatase activity (GO:0017111);;	molecular function: binding (GO:0005488);; molecular function: catalytic activity (GO:0003824);; biological process: metabolic process (GO:0008152)	--	--
c35850.graph_c0	0.0072685	-0.739337	normal	6.52432e-11	-1.40386	down	0.012441	-0.660413	normal	gi|678323252|emb|CDW82792.1|	pyruvate kinase [Stylonychia lemnae]	Pyruvate kinase GN=PYK OS=Eimeria tenella (Coccidian parasite) PE=2 SV=1	Carbohydrate transport and metabolism	Molecular Function: nucleotide binding (GO:0000166);; Molecular Function: kinase activity (GO:0016301);; Biological Process: cellular metabolic process (GO:0044237);; Molecular Function: metal ion binding (GO:0046872);;	molecular function: binding (GO:0005488);; molecular function: catalytic activity (GO:0003824);; biological process: metabolic process (GO:0008152);; biological process: cellular process (GO:0009987)	K00873|4.16121e-141|cbr:CBG05956|Hypothetical protein CBG05956; K00873 pyruvate kinase [EC:2.7.1.40] (A)	Glycolysis / Gluconeogenesis (ko00010);; Purine metabolism (ko00230);; Pyruvate metabolism (ko00620);; Carbon metabolism (ko01200);; Biosynthesis of amino acids (ko01230)
c25375.graph_c0	0.475483	-0.381082	normal	0.00320269	-1.16939	down	0.165938	-0.777693	normal	gi|586739039|gb|EAR94493.2|	GTP-binding protein, putative [Tetrahymena thermophila SB210]	--	General function prediction only	Molecular Function: nucleotide binding (GO:0000166);; Molecular Function: isomerase activity (GO:0016853);;	molecular function: binding (GO:0005488);; molecular function: catalytic activity (GO:0003824);; biological process: metabolic process (GO:0008152)	--	--
c48225.graph_c0	0.571022	0.249832	normal	2.366e-05	1.12748	up	0.00312688	0.880237	normal	gi|403333343|gb|EJY65761.1|	ATPases of the AAA+ class [Oxytricha trifallax]	Vesicle-fusing ATPase GN=nsfA OS=Dictyostelium discoideum (Slime mold) PE=1 SV=1	Posttranslational modification, protein turnover, chaperones	Molecular Function: nucleotide binding (GO:0000166);; Molecular Function: hydrolase activity (GO:0016787);;	molecular function: binding (GO:0005488);; molecular function: catalytic activity (GO:0003824);; biological process: metabolic process (GO:0008152)	K06027|3.16869e-161|mze:101470525|vesicle-fusing ATPase-like; K06027 vesicle-fusing ATPase [EC:3.6.4.6] (A)	--
c19918.graph_c0	0.0100121	1.7877	normal	0.00158678	1.55545	up	0.805576	-0.224932	normal	gi|470391148|ref|XP_004334642.1|	Ras family GTPase [Acanthamoeba castellanii str. Neff]	Rho-related protein rac1A (Precursor) GN=rac1A OS=Dictyostelium discoideum (Slime mold) PE=1 SV=2	General function prediction only	Molecular Function: nucleotide binding (GO:0000166);; Molecular Function: hydrolase activity (GO:0016787);;	molecular function: binding (GO:0005488);; molecular function: catalytic activity (GO:0003824);; biological process: metabolic process (GO:0008152)	K07860|1.22792e-60|fab:101808708|RAC2; ras-related C3 botulinum toxin substrate 2 (rho family, small GTP binding protein Rac2); K07860 Ras-related C3 botulinum toxin substrate 2 (A)	MAPK signaling pathway (ko04010);; Wnt signaling pathway (ko04310);; VEGF signaling pathway (ko04370);; Focal adhesion (ko04510);; Adherens junction (ko04520);; Regulation of actin cytoskeleton (ko04810)
c44552.graph_c0	--	--	--	0.000280368	1.67492	up	0.0579439	1.13798	normal	gi|676444441|ref|XP_009050430.1|	hypothetical protein LOTGIDRAFT_213568 [Lottia gigantea]	ATP-dependent RNA helicase bel OS=Drosophila melanogaster (Fruit fly) PE=1 SV=1	RNA processing and modification	Molecular Function: nucleotide binding (GO:0000166);; Molecular Function: helicase activity (GO:0004386);;	molecular function: binding (GO:0005488);; molecular function: catalytic activity (GO:0003824);; biological process: metabolic process (GO:0008152)	--	--
c45076.graph_c0	--	--	--	0.000371698	1.9414	up	0.0769708	1.28793	normal	gi|470508904|ref|XP_004349647.1|	ATPdependent RNA helicase dbp2, putative [Acanthamoeba castellanii str. Neff]	Probable ATP-dependent RNA helicase ddx17 GN=ddx17 OS=Dictyostelium discoideum (Slime mold) PE=3 SV=1	RNA processing and modification	Molecular Function: nucleotide binding (GO:0000166);; Molecular Function: helicase activity (GO:0004386);;	molecular function: binding (GO:0005488);; molecular function: catalytic activity (GO:0003824);; biological process: metabolic process (GO:0008152)	K13178|0|ola:101171584|probable ATP-dependent RNA helicase DDX17-like; K13178 ATP-dependent RNA helicase DDX17 [EC:3.6.4.13] (A)	--
c46080.graph_c0	0.243914	0.755276	normal	0.00372147	1.19653	up	0.482326	0.451671	normal	gi|470530868|ref|XP_004368323.1|	dynamin domain containing protein [Acanthamoeba castellanii str. Neff]	Dynamin-A GN=dymA OS=Dictyostelium discoideum (Slime mold) PE=1 SV=2	--	Molecular Function: nucleotide binding (GO:0000166);; Molecular Function: guanyl-nucleotide exchange factor activity (GO:0005085);; Biological Process: intracellular signal transduction (GO:0035556);; Molecular Function: anion binding (GO:0043168);;	molecular function: binding (GO:0005488);; molecular function: guanyl-nucleotide exchange factor activity (GO:0005085);; biological process: biological regulation (GO:0065007);; biological process: cellular process (GO:0009987);; biological process: signaling (GO:0023052);; biological process: single-organism process (GO:0044699);; biological process: response to stimulus (GO:0050896)	K17065|4.64144e-173|pbi:103052507|dynamin-1-like protein-like; K17065 dynamin 1-like protein [EC:3.6.5.5] (A)	--
c37521.graph_c0	0.380574	-0.381153	normal	0.000198402	0.925599	normal	2.00948e-05	1.31026	up	gi|70888341|gb|AAZ13769.1|	Rab protein [Euplotes octocarinatus]	Ras-related protein Rab-1A GN=RAB1A OS=Lymnaea stagnalis (Great pond snail) PE=2 SV=1	--	Molecular Function: nucleotide binding (GO:0000166);; Molecular Function: GTPase activity (GO:0003924);; Cellular Component: lipid particle (GO:0005811);; Biological Process: ER to Golgi vesicle-mediated transport (GO:0006888);; Biological Process: actin filament organization (GO:0007015);; Biological Process: cell adhesion (GO:0007155);; Biological Process: regulation of cell shape (GO:0008360);…	molecular function: binding (GO:0005488);; molecular function: catalytic activity (GO:0003824);; biological process: metabolic process (GO:0008152);; biological process: cellular process (GO:0009987);; biological process: single-organism process (GO:0044699);; cellular component: cell (GO:0005623);; cellular component: organelle (GO:0043226);; cellular component: cell part (GO:0044464);; biologic…	K07874|4.25313e-63|dvi:Dvir_GJ14443|GJ14443 gene product from transcript GJ14443-RA; K07874 Ras-related protein Rab-1A (A)	--
c49496.graph_c0	0.153831	0.872112	normal	4.51168e-05	1.45736	up	0.268604	0.591279	normal	gi|470518690|ref|XP_004353366.1|	valine-tRNA ligase [Acanthamoeba castellanii str. Neff]	Probable valine--tRNA ligase, cytoplasmic GN=valS1 OS=Dictyostelium discoideum (Slime mold) PE=3 SV=1	Translation, ribosomal structure and biogenesis	Molecular Function: nucleotide binding (GO:0000166);; Molecular Function: glutamate-tRNA ligase activity (GO:0004818);; Molecular Function: valine-tRNA ligase activity (GO:0004832);; Biological Process: valyl-tRNA aminoacylation (GO:0006438);; Biological Process: neurogenesis (GO:0022008);;	molecular function: binding (GO:0005488);; molecular function: catalytic activity (GO:0003824);; biological process: metabolic process (GO:0008152);; biological process: cellular process (GO:0009987);; biological process: single-organism process (GO:0044699);; biological process: multicellular organismal process (GO:0032501);; biological process: developmental process (GO:0032502)	K01873|0|dan:Dana_GF11945|GF11945 gene product from transcript GF11945-RA; K01873 valyl-tRNA synthetase [EC:6.1.1.9] (A)	Aminoacyl-tRNA biosynthesis (ko00970)
c19579.graph_c0	0.0675379	-1.10846	normal	1.8365e-08	1.76441	up	5.06927e-13	2.88625	up	gi|403356083|gb|EJY77631.1|	hypothetical protein OXYTRI_00735 [Oxytricha trifallax]	DNA repair protein Rad51 homolog GN=spn-A OS=Drosophila melanogaster (Fruit fly) PE=2 SV=1	Replication, recombination and repair	Molecular Function: nucleotide binding (GO:0000166);; Molecular Function: DNA binding (GO:0003677);; Biological Process: DNA metabolic process (GO:0006259);; Molecular Function: nucleoside-triphosphatase activity (GO:0017111);; Biological Process: single-organism cellular process (GO:0044763);;	molecular function: binding (GO:0005488);; biological process: metabolic process (GO:0008152);; biological process: cellular process (GO:0009987);; molecular function: catalytic activity (GO:0003824);; biological process: single-organism process (GO:0044699)	K04482|3.78857e-119|tca:662986|Rad51, spn-A; spindle A-like protein; K04482 DNA repair protein RAD51 (A)	Homologous recombination (ko03440);; Fanconi anemia pathway (ko03460)
c23879.graph_c0	--	--	--	0.000708566	1.64961	up	0.24972	0.937709	normal	gi|470465198|ref|XP_004341591.1|	Ras family protein [Acanthamoeba castellanii str. Neff]	Ras-related protein Rab-24 GN=rab24 OS=Dictyostelium discoideum (Slime mold) PE=3 SV=1	General function prediction only	Molecular Function: nucleotide binding (GO:0000166);; Molecular Function: catalytic activity (GO:0003824);; Biological Process: signal transduction (GO:0007165);; Molecular Function: ion binding (GO:0043167);;	molecular function: binding (GO:0005488);; molecular function: catalytic activity (GO:0003824);; biological process: metabolic process (GO:0008152);; biological process: cellular process (GO:0009987);; biological process: signaling (GO:0023052);; biological process: single-organism process (GO:0044699);; biological process: response to stimulus (GO:0050896);; biological process: biological regula…	K07912|7.09382e-59|amj:102564983|RAB24; RAB24, member RAS oncogene family; K07912 Ras-related protein Rab-24 (A)	--
c51358.graph_c0	0.76705	-0.17695	normal	0.000866485	-1.2826	down	0.00177878	-1.10516	down	gi|403373989|gb|EJY86927.1|	Zinc carboxypeptidase, putative [Oxytricha trifallax]	Cytosolic carboxypeptidase NnaD GN=NnaD OS=Drosophila melanogaster (Fruit fly) PE=2 SV=2	Amino acid transport and metabolism	Molecular Function: nucleotide binding (GO:0000166);; Molecular Function: carboxypeptidase activity (GO:0004180);; Molecular Function: protein kinase activity (GO:0004672);; Molecular Function: nucleotidyltransferase activity (GO:0016779);; Biological Process: protein metabolic process (GO:0019538);; Molecular Function: ion binding (GO:0043167);; Biological Process: cellular macromolecule metabol…	molecular function: binding (GO:0005488);; molecular function: catalytic activity (GO:0003824);; biological process: metabolic process (GO:0008152);; biological process: cellular process (GO:0009987)	--	--
c48982.graph_c1	--	--	--	0.00387736	1.46495	up	0.237182	1.20366	normal	gi|470410141|ref|XP_004336240.1|	protein serine/threonine kinase [Acanthamoeba castellanii str. Neff]	Myosin light chain kinase A GN=mlkA OS=Dictyostelium discoideum (Slime mold) PE=1 SV=2	Signal transduction mechanisms	Molecular Function: nucleotide binding (GO:0000166);; Molecular Function: calmodulin-dependent protein kinase activity (GO:0004683);; Molecular Function: calmodulin binding (GO:0005516);; Cellular Component: cytosol (GO:0005829);; Cellular Component: calcium- and calmodulin-dependent protein kinase complex (GO:0005954);; Biological Process: protein phosphorylation (GO:0006468);;	molecular function: binding (GO:0005488);; molecular function: catalytic activity (GO:0003824);; biological process: metabolic process (GO:0008152);; biological process: cellular process (GO:0009987);; cellular component: cell (GO:0005623);; cellular component: cell part (GO:0044464);; cellular component: macromolecular complex (GO:0032991)	K08794|1.26449e-96|aqu:100635387|calcium/calmodulin-dependent protein kinase type 1D-like; K08794 calcium/calmodulin-dependent protein kinase I [EC:2.7.11.17] (A)	--
c37995.graph_c0	--	--	--	0.0457777	1.10213	normal	0.00745399	1.68385	up	gi|470264870|ref|XP_004361333.1|	myosin light chain kinase [Dictyostelium fasciculatum]	Myosin light chain kinase A GN=mlkA OS=Dictyostelium discoideum (Slime mold) PE=1 SV=2	Signal transduction mechanisms	Molecular Function: nucleotide binding (GO:0000166);; Molecular Function: calmodulin-dependent protein kinase activity (GO:0004683);; Molecular Function: calmodulin binding (GO:0005516);; Cellular Component: cytosol (GO:0005829);; Biological Process: protein phosphorylation (GO:0006468);;	molecular function: binding (GO:0005488);; molecular function: catalytic activity (GO:0003824);; biological process: metabolic process (GO:0008152);; biological process: cellular process (GO:0009987);; cellular component: cell (GO:0005623);; cellular component: cell part (GO:0044464)	K08794|2.92644e-94|tca:656309|calcium/calmodulin-dependent protein kinase type 1; K08794 calcium/calmodulin-dependent protein kinase I [EC:2.7.11.17] (A)	--
c24307.graph_c0	0.533891	0.494708	normal	0.00566033	1.24342	up	0.263943	0.76088	normal	gi|330791323|ref|XP_003283743.1|	prolyl-tRNA synthetase [Dictyostelium purpureum]	Proline--tRNA ligase GN=proRS OS=Plasmodium falciparum (isolate 3D7) PE=1 SV=1	Translation, ribosomal structure and biogenesis	Molecular Function: nucleotide binding (GO:0000166);; Molecular Function: aminoacyl-tRNA ligase activity (GO:0004812);; Biological Process: tRNA aminoacylation for protein translation (GO:0006418);;	molecular function: binding (GO:0005488);; molecular function: catalytic activity (GO:0003824);; biological process: metabolic process (GO:0008152);; biological process: cellular process (GO:0009987);; biological process: single-organism process (GO:0044699)	K01881|2.6435e-174|xla:100158287|uncharacterized LOC100158287; K01881 prolyl-tRNA synthetase [EC:6.1.1.15] (A)	Aminoacyl-tRNA biosynthesis (ko00970)
c44863.graph_c0	0.968429	0.0222144	normal	1.91236e-17	1.81282	up	4.25647e-13	1.79331	up	gi|678340798|emb|CDW73765.1|	prolyl-trna [Stylonychia lemnae]	Proline--tRNA ligase GN=proRS OS=Plasmodium falciparum (isolate 3D7) PE=1 SV=1	Translation, ribosomal structure and biogenesis	Molecular Function: nucleotide binding (GO:0000166);; Molecular Function: aminoacyl-tRNA ligase activity (GO:0004812);; Biological Process: tRNA aminoacylation for protein translation (GO:0006418);;	molecular function: binding (GO:0005488);; molecular function: catalytic activity (GO:0003824);; biological process: metabolic process (GO:0008152);; biological process: cellular process (GO:0009987);; biological process: single-organism process (GO:0044699)	K01881|0|cbr:CBG24153|Cbr-prs-1; C. briggsae CBR-PRS-1 protein; K01881 prolyl-tRNA synthetase [EC:6.1.1.15] (A)	Aminoacyl-tRNA biosynthesis (ko00970)
c45103.graph_c0	0.271693	0.537289	normal	5.02209e-23	3.20864	up	3.2217e-14	2.67743	up	gi|281201813|gb|EFA76021.1|	prolyl-tRNA synthetase [Polysphondylium pallidum PN500]	Proline--tRNA ligase GN=proRS OS=Plasmodium falciparum (isolate 3D7) PE=1 SV=1	Translation, ribosomal structure and biogenesis	Molecular Function: nucleotide binding (GO:0000166);; Molecular Function: aminoacyl-tRNA ligase activity (GO:0004812);; Biological Process: tRNA aminoacylation for protein translation (GO:0006418);;	molecular function: binding (GO:0005488);; molecular function: catalytic activity (GO:0003824);; biological process: metabolic process (GO:0008152);; biological process: cellular process (GO:0009987);; biological process: single-organism process (GO:0044699)	K14163|6.21547e-178|oaa:100080762|EPRS; bifunctional glutamate/proline--tRNA ligase; K14163 bifunctional glutamyl/prolyl-tRNA synthetase [EC:6.1.1.17 6.1.1.15] (A)	Porphyrin and chlorophyll metabolism (ko00860);; Aminoacyl-tRNA biosynthesis (ko00970)
c49008.graph_c0	0.980639	0.0158036	normal	1.51865e-14	1.89644	up	1.25644e-11	1.88352	up	gi|403369456|gb|EJY84572.1|	Isoleucine--tRNA ligase [Oxytricha trifallax]	Isoleucine--tRNA ligase GN=ILSA OS=Tetrahymena thermophila PE=3 SV=1	Translation, ribosomal structure and biogenesis	Molecular Function: nucleotide binding (GO:0000166);; Molecular Function: aminoacyl-tRNA ligase activity (GO:0004812);; Biological Process: tRNA aminoacylation for protein translation (GO:0006418);;	molecular function: binding (GO:0005488);; molecular function: catalytic activity (GO:0003824);; biological process: metabolic process (GO:0008152);; biological process: cellular process (GO:0009987);; biological process: single-organism process (GO:0044699)	K01870|0|xma:102231490|isoleucine--tRNA ligase, cytoplasmic-like; K01870 isoleucyl-tRNA synthetase [EC:6.1.1.5] (A)	Aminoacyl-tRNA biosynthesis (ko00970)
c45364.graph_c0	0.347173	0.370755	normal	4.03911e-06	1.12459	up	0.0161298	0.755558	normal	gi|403373131|gb|EJY86479.1|	Alanyl-tRNA synthetase, putative [Oxytricha trifallax]	Alanine--tRNA ligase, mitochondrial {ECO:0000255|HAMAP-Rule:MF_03133} GN=malaS OS=Dictyostelium discoideum (Slime mold) PE=3 SV=1	Translation, ribosomal structure and biogenesis	Molecular Function: nucleotide binding (GO:0000166);; Molecular Function: aminoacyl-tRNA ligase activity (GO:0004812);; Biological Process: tRNA aminoacylation (GO:0043039);;	molecular function: binding (GO:0005488);; molecular function: catalytic activity (GO:0003824);; biological process: metabolic process (GO:0008152);; biological process: cellular process (GO:0009987);; biological process: single-organism process (GO:0044699)	--	--
c32788.graph_c0	1.08324e-05	-1.30872	down	5.52323e-12	-1.80559	down	0.211421	-0.497306	normal	gi|403376764|gb|EJY88363.1|	nucleolar GTP-binding protein 1 [Oxytricha trifallax]	Probable nucleolar GTP-binding protein 1 GN=CG8801 OS=Drosophila melanogaster (Fruit fly) PE=2 SV=1	General function prediction only	Molecular Function: nucleotide binding (GO:0000166);; Cellular Component: nucleus (GO:0005634);;	molecular function: binding (GO:0005488);; cellular component: cell (GO:0005623);; cellular component: organelle (GO:0043226);; cellular component: cell part (GO:0044464)	K06943|6.82995e-174|tca:664391|probable nucleolar GTP-binding protein 1; K06943 nucleolar GTP-binding protein (A)	Ribosome biogenesis in eukaryotes (ko03008)
c49609.graph_c0	0.318269	-0.359089	normal	1.39996e-07	-1.33833	down	0.00335731	-0.975937	normal	gi|678311314|emb|CDW88930.1|	probable global transcription activator snf2l1 isoform 2 [Stylonychia lemnae]	Chromatin-remodeling complex ATPase chain Iswi GN=Iswi OS=Drosophila melanogaster (Fruit fly) PE=1 SV=1	Transcription	Molecular Function: nucleotide binding (GO:0000166);; Cellular Component: nuclear chromatin (GO:0000790);; Molecular Function: DNA helicase activity (GO:0003678);; Cellular Component: transcription factor complex (GO:0005667);; Cellular Component: polytene chromosome (GO:0005700);; Biological Process: nucleosome assembly (GO:0006334);; Biological Process: muscle organ development (GO:0007517);; M…	molecular function: binding (GO:0005488);; cellular component: cell (GO:0005623);; cellular component: membrane-enclosed lumen (GO:0031974);; cellular component: macromolecular complex (GO:0032991);; cellular component: organelle (GO:0043226);; cellular component: organelle part (GO:0044422);; cellular component: cell part (GO:0044464);; molecular function: catalytic activity (GO:0003824);; biolo…	K11654|2.55664e-175|api:100162928|chromatin-remodeling complex ATPase chain Iswi-like; K11654 SWI/SNF-related matrix-associated actin-dependent regulator of chromatin subfamily A member 5 [EC:3.6.4.-] (A)	--
c43028.graph_c0	--	--	--	5.11106e-06	2.77228	up	0.0598969	1.52713	normal	gi|514694391|ref|XP_004994767.1|	GTP-binding protein yptV1 [Salpingoeca rosetta]	Ras-related protein Rab-2 GN=RAB2 OS=Lymnaea stagnalis (Great pond snail) PE=2 SV=1	Intracellular trafficking, secretion, and vesicular transport	Molecular Function: nucleotide binding (GO:0000166);; Cellular Component: neuronal cell body (GO:0043025);;	molecular function: binding (GO:0005488);; cellular component: cell (GO:0005623);; cellular component: cell part (GO:0044464)	K07877|2.32153e-59|lcm:102367697|RAB2A; RAB2A, member RAS oncogene family; K07877 Ras-related protein Rab-2A (A)	--
c39912.graph_c0	0.0678754	1.21736	normal	0.000450842	1.6062	up	0.578524	0.400535	normal	gi|281209719|gb|EFA83887.1|	chaperonin 60 [Polysphondylium pallidum PN500]	60 kDa heat shock protein, mitochondrial (Precursor) GN=hspA OS=Dictyostelium discoideum (Slime mold) PE=2 SV=1	Posttranslational modification, protein turnover, chaperones	Molecular Function: nucleotide binding (GO:0000166);; Cellular Component: mitochondrion (GO:0005739);; Biological Process: protein folding (GO:0006457);; Biological Process: protein targeting to mitochondrion (GO:0006626);; Biological Process: response to unfolded protein (GO:0006986);; Molecular Function: ATPase activity, coupled (GO:0042623);;	molecular function: binding (GO:0005488);; cellular component: cell (GO:0005623);; cellular component: organelle (GO:0043226);; cellular component: cell part (GO:0044464);; biological process: metabolic process (GO:0008152);; biological process: cellular process (GO:0009987);; biological process: single-organism process (GO:0044699);; biological process: localization (GO:0051179);; biological pro…	--	--
c19929.graph_c0	0.00936023	-0.846208	normal	2.95228e-08	-1.3864	down	0.0879208	-0.53947	normal	gi|678311556|emb|CDW88816.1|	kinesin motor domain containing protein [Stylonychia lemnae]	Kinesin-related protein 10 GN=kif10 OS=Dictyostelium discoideum (Slime mold) PE=3 SV=1	Cytoskeleton	Molecular Function: nucleotide binding (GO:0000166);; Cellular Component: microtubule cytoskeleton (GO:0015630);; Molecular Function: lyase activity (GO:0016829);; Cellular Component: protein complex (GO:0043234);; Cellular Component: cytoskeletal part (GO:0044430);;	molecular function: binding (GO:0005488);; cellular component: cell (GO:0005623);; cellular component: organelle (GO:0043226);; cellular component: cell part (GO:0044464);; molecular function: catalytic activity (GO:0003824);; biological process: metabolic process (GO:0008152);; cellular component: macromolecular complex (GO:0032991);; cellular component: organelle part (GO:0044422)	K10401|8.16732e-122|nve:NEMVE_v1g114717|hypothetical protein; K10401 kinesin family member 18/19 (A)	--
c26863.graph_c0	0.317993	-0.656107	normal	0.000598115	-1.80954	down	--	--	--	gi|678332279|emb|CDW78179.1|	kinesin heavy chain [Stylonychia lemnae]	Kinesin-related protein 3 GN=kif3 OS=Dictyostelium discoideum (Slime mold) PE=1 SV=1	Cytoskeleton	Molecular Function: nucleotide binding (GO:0000166);; Cellular Component: microtubule cytoskeleton (GO:0015630);; Cellular Component: protein complex (GO:0043234);; Cellular Component: cytoskeletal part (GO:0044430);;	molecular function: binding (GO:0005488);; cellular component: cell (GO:0005623);; cellular component: organelle (GO:0043226);; cellular component: cell part (GO:0044464);; cellular component: macromolecular complex (GO:0032991);; cellular component: organelle part (GO:0044422)	K10396|5.90478e-110|bacu:103004045|KIF5C; kinesin family member 5C; K10396 kinesin family member 5 (A)	Dopaminergic synapse (ko04728)
c46702.graph_c0	0.00778228	-0.803802	normal	1.71473e-10	-1.44513	down	0.0219757	-0.63926	normal	gi|403359108|gb|EJY79211.1|	Kinesin motor domain containing protein [Oxytricha trifallax]	Osmotic avoidance abnormal protein 3 GN=osm-3 OS=Caenorhabditis elegans PE=2 SV=4	Cytoskeleton	Molecular Function: nucleotide binding (GO:0000166);; Cellular Component: microtubule cytoskeleton (GO:0015630);; Cellular Component: protein complex (GO:0043234);; Cellular Component: cytoskeletal part (GO:0044430);;	molecular function: binding (GO:0005488);; cellular component: cell (GO:0005623);; cellular component: organelle (GO:0043226);; cellular component: cell part (GO:0044464);; cellular component: macromolecular complex (GO:0032991);; cellular component: organelle part (GO:0044422)	K10394|1.82472e-116|nve:NEMVE_v1g230104|hypothetical protein; K10394 kinesin family member 3/17 (A)	--
c50809.graph_c0	0.00196178	1.12177	up	0.623141	0.19985	normal	0.0162362	-0.923504	normal	gi|678325909|emb|CDW81442.1|	UNKNOWN [Stylonychia lemnae]	Kinesin-related protein 3 GN=kif3 OS=Dictyostelium discoideum (Slime mold) PE=1 SV=1	Cytoskeleton	Molecular Function: nucleotide binding (GO:0000166);; Cellular Component: microtubule cytoskeleton (GO:0015630);; Cellular Component: protein complex (GO:0043234);; Cellular Component: cytoskeletal part (GO:0044430);;	molecular function: binding (GO:0005488);; cellular component: cell (GO:0005623);; cellular component: organelle (GO:0043226);; cellular component: cell part (GO:0044464);; cellular component: macromolecular complex (GO:0032991);; cellular component: organelle part (GO:0044422)	K10396|1.82072e-103|tad:TRIADDRAFT_54045|hypothetical protein; K10396 kinesin family member 5 (A)	--
c51205.graph_c0	0.994783	-0.0108701	normal	6.66655e-06	1.68565	up	1.71199e-05	1.69397	up	gi|403344906|gb|EJY71807.1|	hypothetical protein OXYTRI_07201 [Oxytricha trifallax]	Kinesin-like protein KIF15 GN=KIF15 OS=Strongylocentrotus purpuratus (Purple sea urchin) PE=1 SV=1	Cytoskeleton	Molecular Function: nucleotide binding (GO:0000166);; Cellular Component: microtubule cytoskeleton (GO:0015630);; Cellular Component: protein complex (GO:0043234);; Cellular Component: cytoskeletal part (GO:0044430);;	molecular function: binding (GO:0005488);; cellular component: cell (GO:0005623);; cellular component: organelle (GO:0043226);; cellular component: cell part (GO:0044464);; cellular component: macromolecular complex (GO:0032991);; cellular component: organelle part (GO:0044422)	K10400|3.92066e-107|fab:101807751|kinesin-like protein KIF15-like; K10400 kinesin family member 15 (A)	--
c32743.graph_c0	0.58835	0.505289	normal	0.00541552	1.19556	up	0.341339	0.699422	normal	gi|11466508|ref|NP_044757.1|	elongation factor Tu (mitochondrion) [Reclinomonas americana]	Elongation factor Tu, mitochondrial GN=TUFA OS=Reclinomonas americana PE=3 SV=1	Translation, ribosomal structure and biogenesis	Molecular Function: nucleotide binding (GO:0000166);; Cellular Component: intracellular (GO:0005622);; Biological Process: translation (GO:0006412);; Molecular Function: transferase activity (GO:0016740);;	molecular function: binding (GO:0005488);; cellular component: cell (GO:0005623);; cellular component: cell part (GO:0044464);; biological process: metabolic process (GO:0008152);; biological process: cellular process (GO:0009987);; molecular function: catalytic activity (GO:0003824)	--	--
c37618.graph_c0	0.0913207	0.624807	normal	1.14805e-10	1.59094	up	0.000909566	0.970222	normal	gi|443692874|gb|ELT94379.1|	hypothetical protein CAPTEDRAFT_193005 [Capitella teleta]	Ras-related protein Rab-11C GN=rab11C OS=Dictyostelium discoideum (Slime mold) PE=1 SV=1	General function prediction only	Molecular Function: nucleotide binding (GO:0000166);; Biological Process: transport (GO:0006810);; Biological Process: single-organism cellular process (GO:0044763);; Cellular Component: synapse (GO:0045202);; Biological Process: regulation of cellular process (GO:0050794);;	molecular function: binding (GO:0005488);; biological process: localization (GO:0051179);; biological process: cellular process (GO:0009987);; biological process: single-organism process (GO:0044699);; cellular component: synapse (GO:0045202);; biological process: biological regulation (GO:0065007)	K07914|6.65332e-49|dre:550410|zgc:112183; K07914 Ras-related protein Rab-37 (A)	--
c19326.graph_c0	0.0045721	1.26965	up	0.530028	0.242686	normal	0.0336986	-1.01817	normal	gi|403363764|gb|EJY81633.1|	ABC transporter [Oxytricha trifallax]	ABC transporter B family member 6 GN=abcB6 OS=Dictyostelium discoideum (Slime mold) PE=3 SV=1	Intracellular trafficking, secretion, and vesicular transport	Molecular Function: nucleotide binding (GO:0000166);; Biological Process: transport (GO:0006810);; Biological Process: cellular process (GO:0009987);; Molecular Function: ATPase activity, coupled to transmembrane movement of substances (GO:0042626);;	molecular function: binding (GO:0005488);; biological process: localization (GO:0051179);; biological process: cellular process (GO:0009987);; molecular function: catalytic activity (GO:0003824);; molecular function: transporter activity (GO:0005215);; biological process: metabolic process (GO:0008152);; biological process: single-organism process (GO:0044699)	K05662|3.55016e-29|dsi:Dsim_GD13632|GD13632 gene product from transcript GD13632-RA; K05662 ATP-binding cassette, subfamily B (MDR/TAP), member 7 (A)	ABC transporters (ko02010)
c46533.graph_c0	0.562314	0.440701	normal	0.0029404	1.21924	up	0.179486	0.789139	normal	gi|290992156|ref|XP_002678700.1|	predicted protein [Naegleria gruberi]	Eukaryotic translation initiation factor 5B GN=eif5b OS=Dictyostelium discoideum (Slime mold) PE=3 SV=1	Translation, ribosomal structure and biogenesis	Molecular Function: nucleotide binding (GO:0000166);; Biological Process: translation (GO:0006412);; Molecular Function: translation factor activity, nucleic acid binding (GO:0008135);; Molecular Function: transferase activity (GO:0016740);; Biological Process: single-organism metabolic process (GO:0044710);;	molecular function: binding (GO:0005488);; biological process: metabolic process (GO:0008152);; biological process: cellular process (GO:0009987);; molecular function: catalytic activity (GO:0003824);; biological process: single-organism process (GO:0044699)	K03243|0|hmg:100198796|eukaryotic translation initiation factor 5B-like; K03243 translation initiation factor 5B (A)	RNA transport (ko03013)
c24245.graph_c0	--	--	--	0.000128766	2.12096	up	0.126148	1.01733	normal	gi|443702871|gb|ELU00694.1|	hypothetical protein CAPTEDRAFT_4023 [Capitella teleta]	ADP-ribosylation factor 1-like 2 GN=arf-1.2 OS=Caenorhabditis briggsae PE=3 SV=3	Intracellular trafficking, secretion, and vesicular transport	Molecular Function: nucleotide binding (GO:0000166);; Biological Process: signal transduction (GO:0007165);;	molecular function: binding (GO:0005488);; biological process: cellular process (GO:0009987);; biological process: signaling (GO:0023052);; biological process: single-organism process (GO:0044699);; biological process: response to stimulus (GO:0050896);; biological process: biological regulation (GO:0065007)	K07937|1.51939e-66|smm:Smp_032180|ADP-ribosylation factor arf; K07937 ADP-ribosylation factor 1 (A)	Endocytosis (ko04144)
c31272.graph_c0	--	--	--	3.21453e-06	2.12204	up	0.207258	0.995068	normal	gi|514698496|ref|XP_004996817.1|	ADP-ribosylation factor 5 [Salpingoeca rosetta]	ADP-ribosylation factor 1-like 2 GN=arf-1.2 OS=Caenorhabditis briggsae PE=3 SV=3	Intracellular trafficking, secretion, and vesicular transport	Molecular Function: nucleotide binding (GO:0000166);; Biological Process: signal transduction (GO:0007165);;	molecular function: binding (GO:0005488);; biological process: cellular process (GO:0009987);; biological process: signaling (GO:0023052);; biological process: single-organism process (GO:0044699);; biological process: response to stimulus (GO:0050896);; biological process: biological regulation (GO:0065007)	K07937|9.81704e-67|lcm:102350579|ADP-ribosylation factor 1-like; K07937 ADP-ribosylation factor 1 (A)	Endocytosis (ko04144)
c55360.graph_c0	0.42839	0.425186	normal	0.000351738	1.14675	up	0.0740261	0.724706	normal	gi|403372762|gb|EJY86287.1|	Rab family GTPase [Oxytricha trifallax]	Ras-related protein Rab-1B (Precursor) GN=rab1B OS=Dictyostelium discoideum (Slime mold) PE=2 SV=2	--	Molecular Function: nucleotide binding (GO:0000166);; Biological Process: signal transduction (GO:0007165);;	molecular function: binding (GO:0005488);; biological process: cellular process (GO:0009987);; biological process: signaling (GO:0023052);; biological process: single-organism process (GO:0044699);; biological process: response to stimulus (GO:0050896);; biological process: biological regulation (GO:0065007)	K06109|7.45912e-63|hgl:101706031|Rab13; RAB13, member RAS oncogene family; K06109 Ras-related protein Rab-13 (A)	Tight junction (ko04530)
c35715.graph_c0	0.47099	0.65132	normal	0.00271562	1.39498	up	0.288836	0.753602	normal	gi|588316967|emb|CCW63933.1|	unnamed protein product [Phytomonas sp. isolate EM1]	Inosine-5&apos;-monophosphate dehydrogenase {ECO:0000255|HAMAP-Rule:MF_03156} GN=impdh OS=Dictyostelium discoideum (Slime mold) PE=1 SV=1	Nucleotide transport and metabolism	Molecular Function: nucleotide binding (GO:0000166);; Biological Process: purine nucleotide biosynthetic process (GO:0006164);; Molecular Function: oxidoreductase activity (GO:0016491);;	molecular function: binding (GO:0005488);; biological process: metabolic process (GO:0008152);; biological process: cellular process (GO:0009987);; biological process: single-organism process (GO:0044699);; molecular function: catalytic activity (GO:0003824)	--	--
c52308.graph_c0	0.0615558	-0.616379	normal	0.000310342	0.947662	normal	1.33022e-09	1.5703	up	gi|50787725|emb|CAH04414.1|	peptidyl-prolyl cis-trans isomerase [Euplotes vannus]	Peptidyl-prolyl cis-trans isomerase GN=CYP-1 OS=Echinococcus granulosus (Hydatid tapeworm) PE=2 SV=2	Posttranslational modification, protein turnover, chaperones	Molecular Function: nucleotide binding (GO:0000166);; Biological Process: protein peptidyl-prolyl isomerization (GO:0000413);; Molecular Function: RNA binding (GO:0003723);; Molecular Function: peptidyl-prolyl cis-trans isomerase activity (GO:0003755);; Biological Process: protein folding (GO:0006457);;	molecular function: binding (GO:0005488);; biological process: metabolic process (GO:0008152);; biological process: cellular process (GO:0009987);; biological process: single-organism process (GO:0044699);; molecular function: catalytic activity (GO:0003824)	--	--
c50218.graph_c0	0.373518	0.484146	normal	3.08113e-05	1.32307	up	0.096283	0.848785	normal	gi|656182840|emb|CDR93681.1|	heat shock protein 70, putative [Babesia bigemina]	Heat shock 70 kDa protein, mitochondrial (Precursor) GN=mhsp70 OS=Dictyostelium discoideum (Slime mold) PE=1 SV=1	Posttranslational modification, protein turnover, chaperones	Molecular Function: nucleotide binding (GO:0000166);; Biological Process: metabolic process (GO:0008152);; Molecular Function: oxidoreductase activity (GO:0016491);;	molecular function: binding (GO:0005488);; biological process: metabolic process (GO:0008152);; molecular function: catalytic activity (GO:0003824);; biological process: single-organism process (GO:0044699)	K04043|0|xma:102235937|stress-70 protein, mitochondrial-like; K04043 molecular chaperone DnaK (A)	RNA degradation (ko03018)
c26187.graph_c0	0.126515	0.932095	normal	0.0772402	-0.874637	normal	0.00254994	-1.8031	down	gi|67473822|ref|XP_652660.1|	Rho family GTPase [Entamoeba histolytica HM-1:IMSS]	Ras-related protein Rac2 (Precursor) GN=Rac2 OS=Drosophila melanogaster (Fruit fly) PE=1 SV=1	General function prediction only	Molecular Function: nucleotide binding (GO:0000166);; Biological Process: establishment of imaginal disc-derived wing hair orientation (GO:0001737);; Biological Process: cellular response to DNA damage stimulus (GO:0006974);; Biological Process: JNK cascade (GO:0007254);; Biological Process: germ-band shortening (GO:0007390);; Biological Process: dorsal closure, elongation of leading edge cells (…	molecular function: binding (GO:0005488);; biological process: cellular process (GO:0009987);; biological process: multicellular organismal process (GO:0032501);; biological process: developmental process (GO:0032502);; biological process: single-organism process (GO:0044699);; biological process: cellular component organization or biogenesis (GO:0071840);; biological process: response to stimulu…	K04392|4.38664e-25|dsi:Dsim_GD21343|GD21343 gene product from transcript GD21343-RA; K04392 Ras-related C3 botulinum toxin substrate 1 (A)	Phagosome (ko04145);; Wnt signaling pathway (ko04310)
c19773.graph_c0	0.46261	0.360819	normal	3.46677e-26	3.11418	up	1.18232e-15	2.75474	up	gi|403359496|gb|EJY79411.1|	MCM2/3/5 family protein [Oxytricha trifallax]	DNA replication licensing factor Mcm2 GN=Mcm2 OS=Drosophila melanogaster (Fruit fly) PE=1 SV=1	Replication, recombination and repair	Molecular Function: nucleotide binding (GO:0000166);; Biological Process: DNA replication (GO:0006260);;	molecular function: binding (GO:0005488);; biological process: metabolic process (GO:0008152);; biological process: cellular process (GO:0009987)	K02540|0|spu:579797|DNA replication licensing factor mcm2-like; K02540 DNA replication licensing factor MCM2 [EC:3.6.4.12] (A)	DNA replication (ko03030)
c44681.graph_c0	0.23654	0.954837	normal	0.00667805	1.41381	up	0.547102	0.472308	normal	gi|470434800|ref|XP_004338718.1|	Tcomplex protein 1, theta subunit [Acanthamoeba castellanii str. Neff]	T-complex protein 1 subunit theta GN=cct8 OS=Dictyostelium discoideum (Slime mold) PE=3 SV=1	Posttranslational modification, protein turnover, chaperones	Molecular Function: nucleotide binding (GO:0000166);; Biological Process: cellular protein metabolic process (GO:0044267);;	molecular function: binding (GO:0005488);; biological process: metabolic process (GO:0008152);; biological process: cellular process (GO:0009987)	K09500|0|fpg:101914998|CCT8; chaperonin containing TCP1, subunit 8 (theta); K09500 T-complex protein 1 subunit theta (A)	--
c36982.graph_c1	0.574109	0.442631	normal	0.0940294	-0.901813	normal	0.00601721	-1.34611	down	gi|678338411|emb|CDW74983.1|	dynein heavy chain [Stylonychia lemnae]	Dynein beta chain, ciliary OS=Tripneustes gratilla (Hawaian sea urchin) PE=1 SV=1	Cytoskeleton	Molecular Function: nucleotide binding (GO:0000166);; Biological Process: cellular process (GO:0009987);; Molecular Function: nucleoside-triphosphatase activity (GO:0017111);;	molecular function: binding (GO:0005488);; biological process: cellular process (GO:0009987);; molecular function: catalytic activity (GO:0003824);; biological process: metabolic process (GO:0008152)	K10408|8.27078e-82|aag:AaeL_AAEL007225|dynein heavy chain; K10408 dynein heavy chain, axonemal (A)	--
c48240.graph_c2	--	--	--	1.09109e-05	1.86033	up	0.0537209	1.11931	normal	gi|281202848|gb|EFA77050.1|	cytoplasmic dynein heavy chain [Polysphondylium pallidum PN500]	Dynein heavy chain, cytoplasmic GN=dhcA OS=Dictyostelium discoideum (Slime mold) PE=1 SV=2	Cytoskeleton	Molecular Function: nucleotide binding (GO:0000166);; Biological Process: cellular process (GO:0009987);; Molecular Function: nucleoside-triphosphatase activity (GO:0017111);;	molecular function: binding (GO:0005488);; biological process: cellular process (GO:0009987);; molecular function: catalytic activity (GO:0003824);; biological process: metabolic process (GO:0008152)	K10413|0|aml:100467615|cytoplasmic dynein 1 heavy chain 1-like; K10413 dynein heavy chain 1, cytosolic (A)	Phagosome (ko04145);; Vasopressin-regulated water reabsorption (ko04962);; Salmonella infection (ko05132)
c50280.graph_c0	0.306973	-0.38606	normal	0.00125579	-1.01091	down	0.107796	-0.626785	normal	gi|403332276|gb|EJY65143.1|	Kinesin motor domain-containing protein [Oxytricha trifallax]	Kinesin-related protein 10 GN=kif10 OS=Dictyostelium discoideum (Slime mold) PE=3 SV=1	Cytoskeleton	Molecular Function: nucleotide binding (GO:0000166);; Biological Process: cellular process (GO:0009987);; Cellular Component: microtubule cytoskeleton (GO:0015630);; Molecular Function: transferase activity (GO:0016740);; Molecular Function: lyase activity (GO:0016829);; Cellular Component: protein complex (GO:0043234);; Cellular Component: cytoskeletal part (GO:0044430);;	molecular function: binding (GO:0005488);; biological process: cellular process (GO:0009987);; cellular component: cell (GO:0005623);; cellular component: organelle (GO:0043226);; cellular component: cell part (GO:0044464);; molecular function: catalytic activity (GO:0003824);; biological process: metabolic process (GO:0008152);; cellular component: macromolecular complex (GO:0032991);; cellular …	K10401|3.86575e-98|bfo:BRAFLDRAFT_133981|hypothetical protein; K10401 kinesin family member 18/19 (A)	--
c42594.graph_c0	0.0751171	1.42823	normal	4.14965e-05	1.80128	up	0.664592	0.385187	normal	gi|156403802|ref|XP_001640097.1|	predicted protein [Nematostella vectensis]	Eukaryotic peptide chain release factor GTP-binding subunit GN=erf3 OS=Dictyostelium discoideum (Slime mold) PE=2 SV=1	Translation, ribosomal structure and biogenesis	Molecular Function: nucleotide binding (GO:0000166);; Biological Process: cellular metabolic process (GO:0044237);; Biological Process: primary metabolic process (GO:0044238);; Biological Process: organic substance metabolic process (GO:0071704);;	molecular function: binding (GO:0005488);; biological process: metabolic process (GO:0008152);; biological process: cellular process (GO:0009987)	K03267|1.01276e-129|nve:NEMVE_v1g85083|hypothetical protein; K03267 peptide chain release factor subunit 3 (A)	mRNA surveillance pathway (ko03015)
c48163.graph_c0	0.110784	0.950397	normal	1.35619e-06	1.50443	up	0.358865	0.562945	normal	gi|16554296|gb|AAK27413.1|	elongation factor 1 alpha long form [Monosiga brevicollis]	Elongation factor 1-alpha OS=Onchocerca volvulus PE=2 SV=1	Translation, ribosomal structure and biogenesis	Molecular Function: nucleotide binding (GO:0000166);; Biological Process: cellular metabolic process (GO:0044237);; Biological Process: primary metabolic process (GO:0044238);; Biological Process: organic substance metabolic process (GO:0071704);;	molecular function: binding (GO:0005488);; biological process: metabolic process (GO:0008152);; biological process: cellular process (GO:0009987)	K03231|0|xla:100036877|uncharacterized LOC100036877; K03231 elongation factor 1-alpha (A)	RNA transport (ko03013)
c43258.graph_c0	0.0547815	0.992243	normal	0.726992	-0.166929	normal	5.17814e-05	-1.15885	down	gi|678324075|emb|CDW82367.1|	dynein heavy chain family protein [Stylonychia lemnae]	Dynein beta chain, ciliary OS=Tripneustes gratilla (Hawaian sea urchin) PE=1 SV=1	Cytoskeleton	Molecular Function: nucleotide binding (GO:0000166);; Biological Process: cellular component movement (GO:0006928);; Molecular Function: nucleoside-triphosphatase activity (GO:0017111);; Cellular Component: dynein complex (GO:0030286);; Molecular Function: ion binding (GO:0043167);;	molecular function: binding (GO:0005488);; biological process: cellular process (GO:0009987);; biological process: single-organism process (GO:0044699);; molecular function: catalytic activity (GO:0003824);; biological process: metabolic process (GO:0008152);; cellular component: cell (GO:0005623);; cellular component: macromolecular complex (GO:0032991);; cellular component: organelle (GO:004322…	K10408|0|cge:100752773|Dnah7; dynein, axonemal, heavy chain 7; K10408 dynein heavy chain, axonemal (A)	Huntington's disease (ko05016)
c19487.graph_c0	0.826731	0.222317	normal	0.00139203	1.23907	up	0.118287	1.02617	normal	gi|735857517|dbj|GAM20123.1|	hypothetical protein SAMD00019534_032980 [Acytostelium subglobosum LB1]	F-actin-capping protein subunit alpha GN=acpB OS=Dictyostelium discoideum (Slime mold) PE=1 SV=1	Cytoskeleton	Molecular Function: nucleotide binding (GO:0000166);; Biological Process: cell morphogenesis (GO:0000902);; Molecular Function: protein kinase activity (GO:0004672);; Cellular Component: microtubule associated complex (GO:0005875);; Biological Process: phosphate-containing compound metabolic process (GO:0006796);; Biological Process: phagocytosis (GO:0006909);; Biological Process: germarium-deriv…	molecular function: binding (GO:0005488);; biological process: cellular process (GO:0009987);; biological process: developmental process (GO:0032502);; biological process: single-organism process (GO:0044699);; biological process: cellular component organization or biogenesis (GO:0071840);; molecular function: catalytic activity (GO:0003824);; biological process: metabolic process (GO:0008152);; …	K10364|1.59964e-71|nve:NEMVE_v1g242138|hypothetical protein; K10364 capping protein (actin filament) muscle Z-line, alpha (A)	--
c53923.graph_c0	7.4275e-09	-1.46551	down	3.18277e-06	-1.11252	down	0.255117	0.356782	normal	gi|678310890|emb|CDW89135.1|	adenylosuccinate synthetase [Stylonychia lemnae]	Adenylosuccinate synthetase {ECO:0000255|HAMAP-Rule:MF_03125} GN=GSPATT00004603001 OS=Paramecium tetraurelia PE=3 SV=1	Nucleotide transport and metabolism	Molecular Function: nucleotide binding (GO:0000166);; Biological Process: AMP biosynthetic process (GO:0006167);; Molecular Function: ligase activity (GO:0016874);; Molecular Function: metal ion binding (GO:0046872);;	molecular function: binding (GO:0005488);; biological process: metabolic process (GO:0008152);; biological process: cellular process (GO:0009987);; biological process: single-organism process (GO:0044699);; molecular function: catalytic activity (GO:0003824)	K01939|1.54098e-128|nvi:100116750|adenylosuccinate synthetase; K01939 adenylosuccinate synthase [EC:6.3.4.4] (A)	Purine metabolism (ko00230);; Alanine, aspartate and glutamate metabolism (ko00250)
c55375.graph_c0	0.580027	-0.36367	normal	1.59444e-08	1.851	up	2.81755e-14	2.21577	up	gi|678311779|emb|CDW88699.1|	replication factor c subunit 5 [Stylonychia lemnae]	Probable replication factor C subunit 5 GN=rfc5 OS=Dictyostelium discoideum (Slime mold) PE=3 SV=1	Replication, recombination and repair	Molecular Function: nucleotide binding (GO:0000166);;	molecular function: binding (GO:0005488)	K10756|1.70635e-123|spu:764228|replication factor C subunit 5-like; K10756 replication factor C subunit 3/5 (A)	DNA replication (ko03030);; Nucleotide excision repair (ko03420);; Mismatch repair (ko03430)
c55329.graph_c0	0.00146981	0.889736	normal	1.4722e-05	1.02474	up	0.70831	0.137913	normal	gi|164612815|gb|ABY63656.1|	Rab GTPase 43 [Euplotes octocarinatus]	Ras-related protein Rab-8A GN=rab8A OS=Dictyostelium discoideum (Slime mold) PE=3 SV=1	Intracellular trafficking, secretion, and vesicular transport	Molecular Function: nucleotide binding (GO:0000166);;	molecular function: binding (GO:0005488)	K07887|1.86011e-40|asn:102388201|RAB5A; RAB5A, member RAS oncogene family; K07887 Ras-related protein Rab-5A (A)	Endocytosis (ko04144);; Phagosome (ko04145)
c32785.graph_c1	0.00491069	1.06596	up	0.473016	0.233983	normal	0.00523283	-0.830816	normal	gi|403367938|gb|EJY83796.1|	Dynein-1-alpha heavy chain, flagellar inner arm I1 complex, putative [Oxytricha trifallax]	Dynein beta chain, ciliary OS=Tripneustes gratilla (Hawaian sea urchin) PE=1 SV=1	Cytoskeleton	Molecular Function: nucleoside-triphosphatase activity (GO:0017111);; Cellular Component: intracellular organelle (GO:0043229);;	molecular function: catalytic activity (GO:0003824);; biological process: metabolic process (GO:0008152);; cellular component: cell (GO:0005623);; cellular component: organelle (GO:0043226);; cellular component: cell part (GO:0044464)	K10408|0|aga:AgaP_AGAP010435|AGAP010435-PA; K10408 dynein heavy chain, axonemal (A)	--
c30574.graph_c0	--	--	--	0.000835615	1.76798	up	0.000351805	2.28082	up	gi|470288877|ref|XP_004342702.1|	multidrug resistance-associated protein 3 [Capsaspora owczarzaki ATCC 30864]	ABC transporter C family member 3 GN=abcC3 OS=Dictyostelium discoideum (Slime mold) PE=3 SV=1	Secondary metabolites biosynthesis, transport and catabolism	Molecular Function: nucleoside-triphosphatase activity (GO:0017111);;	molecular function: catalytic activity (GO:0003824);; biological process: metabolic process (GO:0008152)	--	--
c50870.graph_c0	2.92849e-05	1.28308	up	0.471996	0.224241	normal	8.79501e-05	-1.05786	down	gi|403343239|gb|EJY70943.1|	ABC transporter family protein [Oxytricha trifallax]	ABC transporter A family member 5 GN=abcA5 OS=Dictyostelium discoideum (Slime mold) PE=3 SV=1	--	Molecular Function: nucleoside-triphosphatase activity (GO:0017111);;	molecular function: catalytic activity (GO:0003824);; biological process: metabolic process (GO:0008152)	K05643|8.71234e-164|cqu:CpipJ_CPIJ010067|ATP-binding cassette sub-family A member 3; K05643 ATP-binding cassette, subfamily A (ABC1), member 3 (A)	ABC transporters (ko02010)
c51764.graph_c0	1.41016e-06	-1.45141	down	8.29508e-10	-1.63405	down	0.690094	-0.178411	normal	gi|678335301|emb|CDW76601.1|	abc transporter family protein [Stylonychia lemnae]	ABC transporter A family member 2 GN=abcA2 OS=Dictyostelium discoideum (Slime mold) PE=3 SV=1	--	Molecular Function: nucleoside-triphosphatase activity (GO:0017111);;	molecular function: catalytic activity (GO:0003824);; biological process: metabolic process (GO:0008152)	K05643|0|aga:AgaP_AGAP012155|AGAP012155-PA; K05643 ATP-binding cassette, subfamily A (ABC1), member 3 (A)	ABC transporters (ko02010)
c35730.graph_c1	0.646422	-0.217358	normal	2.32029e-05	-1.63912	down	0.00238371	-1.41323	down	gi|403334291|gb|EJY66301.1|	ABC transporter family protein [Oxytricha trifallax]	ABC transporter A family member 5 GN=abcA5 OS=Dictyostelium discoideum (Slime mold) PE=3 SV=1	--	Molecular Function: nucleoside-triphosphatase activity (GO:0017111);;	molecular function: catalytic activity (GO:0003824);; biological process: metabolic process (GO:0008152)	K05648|1.82905e-16|aga:AgaP_AGAP010416|AGAP010416-PA; K05648 ATP-binding cassette, subfamily A (ABC1), member 5 (A)	ABC transporters (ko02010)
c36982.graph_c0	0.527601	0.563795	normal	0.175231	-0.864687	normal	0.00263847	-1.43262	down	gi|403330938|gb|EJY64384.1|	Dynein heavy chain family protein [Oxytricha trifallax]	Dynein beta chain, ciliary OS=Heliocidaris crassispina (Sea urchin) PE=1 SV=1	Cytoskeleton	Molecular Function: nucleoside-triphosphatase activity (GO:0017111);;	molecular function: catalytic activity (GO:0003824);; biological process: metabolic process (GO:0008152)	K10408|0|spu:590418|dynein heavy chain 5, axonemal-like; K10408 dynein heavy chain, axonemal (A)	--
c48079.graph_c0	--	--	--	0.00548074	1.39671	up	0.108221	0.97311	normal	gi|167537161|ref|XP_001750250.1|	hypothetical protein [Monosiga brevicollis MX1]	ABC transporter F family member 2 GN=abcF2 OS=Dictyostelium discoideum (Slime mold) PE=3 SV=1	--	Molecular Function: nucleoside-triphosphatase activity (GO:0017111);;	molecular function: catalytic activity (GO:0003824);; biological process: metabolic process (GO:0008152)	K06158|8.09291e-128|ola:101159646|ATP-binding cassette sub-family F member 3-like; K06158 ATP-binding cassette, subfamily F, member 3 (A)	--
c21283.graph_c0	0.115352	1.17307	normal	3.98916e-09	1.9572	up	0.278407	0.794842	normal	gi|281203980|gb|EFA78176.1|	nucleoside diphosphate kinase [Polysphondylium pallidum PN500]	Nucleoside diphosphate kinase, cytosolic GN=ndkC-2 OS=Dictyostelium discoideum (Slime mold) PE=1 SV=1	Nucleotide transport and metabolism	Molecular Function: nucleoside diphosphate kinase activity (GO:0004550);; Molecular Function: ATP binding (GO:0005524);; Biological Process: nucleoside diphosphate phosphorylation (GO:0006165);; Biological Process: GTP biosynthetic process (GO:0006183);; Biological Process: UTP biosynthetic process (GO:0006228);; Biological Process: CTP biosynthetic process (GO:0006241);;	molecular function: catalytic activity (GO:0003824);; biological process: metabolic process (GO:0008152);; biological process: cellular process (GO:0009987);; biological process: single-organism process (GO:0044699);; molecular function: binding (GO:0005488)	K00940|1.14982e-63|dwi:Dwil_GK10972|GK10972 gene product from transcript GK10972-RA; K00940 nucleoside-diphosphate kinase [EC:2.7.4.6] (A)	Purine metabolism (ko00230);; Pyrimidine metabolism (ko00240)
c53245.graph_c0	0.205625	1.04047	normal	1.58856e-05	1.68438	up	0.344038	0.651337	normal	gi|470419731|ref|XP_004337223.1|	nucleoside diphosphate kinase 1, putative [Acanthamoeba castellanii str. Neff]	Nucleoside diphosphate kinase, mitochondrial (Precursor) GN=ndkM OS=Dictyostelium discoideum (Slime mold) PE=1 SV=2	Nucleotide transport and metabolism	Molecular Function: nucleoside diphosphate kinase activity (GO:0004550);; Molecular Function: ATP binding (GO:0005524);; Biological Process: nucleoside diphosphate phosphorylation (GO:0006165);; Biological Process: GTP biosynthetic process (GO:0006183);; Biological Process: UTP biosynthetic process (GO:0006228);; Biological Process: CTP biosynthetic process (GO:0006241);;	molecular function: catalytic activity (GO:0003824);; biological process: metabolic process (GO:0008152);; biological process: cellular process (GO:0009987);; biological process: single-organism process (GO:0044699);; molecular function: binding (GO:0005488)	K00940|1.61354e-64|pbi:103059065|nucleoside diphosphate kinase-like; K00940 nucleoside-diphosphate kinase [EC:2.7.4.6] (A)	Purine metabolism (ko00230);; Pyrimidine metabolism (ko00240)
c51925.graph_c0	0.766106	0.299175	normal	3.76859e-12	2.2538	up	0.000123093	1.9536	up	gi|678343721|emb|CDW72303.1|	zinc finger protein 664 [Stylonychia lemnae]	Protein snail GN=sna OS=Drosophila melanogaster (Fruit fly) PE=1 SV=2	General function prediction only	Molecular Function: nucleic acid binding (GO:0003676);; Molecular Function: metal ion binding (GO:0046872);;	molecular function: binding (GO:0005488)	K09218|1.32416e-06|cin:445743|snail, Ci-snail, Zfp27; snail homolog; K09218 snail, invertebrate (A)	--
c45915.graph_c0	0.274795	0.37994	normal	1.56812e-09	1.46503	up	0.000115523	1.08966	up	gi|471226873|ref|XP_004032462.1|	zinc c2h2 type family protein, putative [Ichthyophthirius multifiliis]	--	--	Molecular Function: nucleic acid binding (GO:0003676);; Molecular Function: metal ion binding (GO:0046872);;	molecular function: binding (GO:0005488)	--	--
c43793.graph_c0	0.271693	0.986423	normal	0.00114809	1.53014	up	0.514199	0.558167	normal	gi|665810200|ref|XP_008553507.1|	PREDICTED: lysine--tRNA ligase isoform X2 [Microplitis demolitor]	Lysine--tRNA ligase GN=krs-1 OS=Caenorhabditis elegans PE=3 SV=1	Translation, ribosomal structure and biogenesis	Molecular Function: nucleic acid binding (GO:0003676);; Molecular Function: lysine-tRNA ligase activity (GO:0004824);; Molecular Function: ATP binding (GO:0005524);; Cellular Component: cytoplasm (GO:0005737);; Biological Process: lysyl-tRNA aminoacylation (GO:0006430);;	molecular function: binding (GO:0005488);; molecular function: catalytic activity (GO:0003824);; biological process: metabolic process (GO:0008152);; cellular component: cell (GO:0005623);; cellular component: cell part (GO:0044464);; biological process: cellular process (GO:0009987);; biological process: single-organism process (GO:0044699)	K04567|0|mde:101887280|lysine--tRNA ligase-like; K04567 lysyl-tRNA synthetase, class II [EC:6.1.1.6] (A)	Aminoacyl-tRNA biosynthesis (ko00970)
c53463.graph_c0	0.612608	-0.202651	normal	6.73132e-08	1.33301	up	6.98062e-10	1.54045	up	gi|403360539|gb|EJY79948.1|	Caltractin (Centrin), putative [Oxytricha trifallax]	Caltractin GN=CTN OS=Naegleria gruberi (Amoeba) PE=2 SV=1	--	Molecular Function: nucleic acid binding (GO:0003676);; Molecular Function: calcium ion binding (GO:0005509);; Molecular Function: ATP binding (GO:0005524);; Molecular Function: ATP-dependent helicase activity (GO:0008026);; Molecular Function: 2-alkenal reductase [NAD(P)] activity (GO:0032440);; Biological Process: oxidation-reduction process (GO:0055114);;	molecular function: binding (GO:0005488);; molecular function: catalytic activity (GO:0003824);; biological process: metabolic process (GO:0008152);; biological process: cellular process (GO:0009987);; biological process: single-organism process (GO:0044699)	K16465|1.10273e-77|dre:795310|cetn2, cb732; centrin, EF-hand protein, 2; K16465 centrin-1 (A)	--
c41866.graph_c0	0.00172437	-0.855105	normal	1.2904e-06	-1.04253	down	0.57088	-0.184856	normal	gi|50787704|emb|CAH04409.1|	hypothetical protein [Euplotes vannus]	Protein lin-54 GN=lin-54 OS=Caenorhabditis elegans PE=1 SV=1	Inorganic ion transport and metabolism	Molecular Function: nucleic acid binding (GO:0003676);; Cellular Component: chromosome (GO:0005694);; Cellular Component: nuclear lumen (GO:0031981);; Biological Process: single-organism developmental process (GO:0044767);; Biological Process: organ development (GO:0048513);; Biological Process: regulation of biological process (GO:0050789);;	molecular function: binding (GO:0005488);; cellular component: cell (GO:0005623);; cellular component: organelle (GO:0043226);; cellular component: cell part (GO:0044464);; cellular component: membrane-enclosed lumen (GO:0031974);; cellular component: organelle part (GO:0044422);; biological process: developmental process (GO:0032502);; biological process: single-organism process (GO:0044699);; b…	--	--
c18584.graph_c0	1.56997e-06	-1.32011	down	3.44584e-30	-2.93114	down	2.04249e-07	-1.6109	down	gi|403337850|gb|EJY68149.1|	La domain containing protein [Oxytricha trifallax]	La-related protein 1 GN=larp-1 OS=Caenorhabditis elegans PE=3 SV=2	--	Molecular Function: nucleic acid binding (GO:0003676);; Biological Process: nitrogen compound metabolic process (GO:0006807);; Cellular Component: intracellular part (GO:0044424);; Biological Process: organic substance metabolic process (GO:0071704);;	molecular function: binding (GO:0005488);; biological process: metabolic process (GO:0008152);; cellular component: cell (GO:0005623);; cellular component: cell part (GO:0044464)	--	--
c38098.graph_c0	0.0713835	-0.538215	normal	2.48178e-07	-1.21703	down	0.0260489	-0.675854	normal	gi|678334072|emb|CDW77247.1|	UNKNOWN [Stylonychia lemnae]	Adult enhancer factor 1 GN=Aef1 OS=Drosophila melanogaster (Fruit fly) PE=2 SV=1	General function prediction only	Molecular Function: nucleic acid binding (GO:0003676);; Biological Process: anatomical structure morphogenesis (GO:0009653);; Biological Process: tissue development (GO:0009888);; Biological Process: single-organism cellular process (GO:0044763);; Biological Process: single-organism developmental process (GO:0044767);; Biological Process: organ development (GO:0048513);; Biological Process: regul…	molecular function: binding (GO:0005488);; biological process: developmental process (GO:0032502);; biological process: cellular process (GO:0009987);; biological process: single-organism process (GO:0044699);; biological process: multicellular organismal process (GO:0032501);; biological process: biological regulation (GO:0065007)	--	--
c38047.graph_c0	0.563215	-0.276651	normal	3.69565e-09	1.57713	up	7.42865e-09	1.85505	up	gi|678327305|emb|CDW80730.1|	flap endonuclease 1-like [Stylonychia lemnae]	Flap endonuclease 1 {ECO:0000255|HAMAP-Rule:MF_03140} OS=Tetrahymena thermophila (strain SB210) PE=3 SV=1	Replication, recombination and repair	Molecular Function: nuclease activity (GO:0004518);; Molecular Function: binding (GO:0005488);; Cellular Component: nucleus (GO:0005634);; Biological Process: DNA metabolic process (GO:0006259);; Biological Process: cellular response to DNA damage stimulus (GO:0006974);;	molecular function: catalytic activity (GO:0003824);; biological process: metabolic process (GO:0008152);; biological process: cellular process (GO:0009987);; molecular function: binding (GO:0005488);; cellular component: cell (GO:0005623);; cellular component: organelle (GO:0043226);; cellular component: cell part (GO:0044464);; biological process: response to stimulus (GO:0050896)	K04799|6.05655e-95|aqu:100633028|flap endonuclease 1-like; K04799 flap endonuclease-1 [EC:3.-.-.-] (A)	DNA replication (ko03030);; Base excision repair (ko03410);; Non-homologous end-joining (ko03450)
c54047.graph_c0	0.916055	0.0754736	normal	6.55226e-07	1.48103	up	8.67e-06	1.40828	up	gi|471231312|ref|XP_004036838.1|	hypothetical protein IMG5_068750 [Ichthyophthirius multifiliis]	Flap endonuclease 1 {ECO:0000255|HAMAP-Rule:MF_03140} OS=Tetrahymena thermophila (strain SB210) PE=3 SV=1	Replication, recombination and repair	Molecular Function: nuclease activity (GO:0004518);; Biological Process: nucleic acid metabolic process (GO:0090304);;	molecular function: catalytic activity (GO:0003824);; biological process: metabolic process (GO:0008152);; biological process: cellular process (GO:0009987)	K04799|1.8818e-16|amj:102563990|FEN1; flap structure-specific endonuclease 1; K04799 flap endonuclease-1 [EC:3.-.-.-] (A)	DNA replication (ko03030);; Base excision repair (ko03410);; Non-homologous end-joining (ko03450)
c48324.graph_c0	0.155241	-0.91583	normal	0.141295	0.556905	normal	0.00532094	1.47384	up	gi|403366756|gb|EJY83183.1|	Exodeoxyribonuclease III family protein [Oxytricha trifallax]	DNA-(apurinic or apyrimidinic site) lyase GN=apeA OS=Dictyostelium discoideum (Slime mold) PE=2 SV=2	Replication, recombination and repair	Molecular Function: nuclease activity (GO:0004518);;	molecular function: catalytic activity (GO:0003824);; biological process: metabolic process (GO:0008152);; biological process: cellular process (GO:0009987)	K10771|1.85714e-36|xtr:394929|apex1; APEX nuclease (multifunctional DNA repair enzyme) 1; K10771 AP endonuclease 1 [EC:4.2.99.18] (A)	Base excision repair (ko03410)
c55088.graph_c0	0.052786	0.603494	normal	3.44427e-20	2.24803	up	1.84086e-10	1.64899	up	gi|403366756|gb|EJY83183.1|	Exodeoxyribonuclease III family protein [Oxytricha trifallax]	DNA-(apurinic or apyrimidinic site) lyase GN=apeA OS=Dictyostelium discoideum (Slime mold) PE=2 SV=2	Replication, recombination and repair	Molecular Function: nuclease activity (GO:0004518);;	molecular function: catalytic activity (GO:0003824);; biological process: metabolic process (GO:0008152);; biological process: cellular process (GO:0009987)	K10771|1.16728e-89|hro:HELRODRAFT_186002|hypothetical protein; K10771 AP endonuclease 1 [EC:4.2.99.18] (A)	Base excision repair (ko03410)
c19776.graph_c0	0.726759	-0.164388	normal	4.6604e-06	-1.25319	down	0.00044965	-1.08185	down	gi|51947519|gb|AAU14244.1|	hydrogenosomal NADH dehydrogenase 51 kDa subunit [Euplotes sp. BB-2004]	NADH dehydrogenase [ubiquinone] flavoprotein 1, mitochondrial (Precursor) GN=ndufv1 OS=Dictyostelium discoideum (Slime mold) PE=2 SV=1	Energy production and conversion	Molecular Function: NADH dehydrogenase (ubiquinone) activity (GO:0008137);; Molecular Function: FMN binding (GO:0010181);; Molecular Function: NAD binding (GO:0051287);; Molecular Function: 4 iron, 4 sulfur cluster binding (GO:0051539);; Biological Process: oxidation-reduction process (GO:0055114);;	molecular function: catalytic activity (GO:0003824);; biological process: metabolic process (GO:0008152);; biological process: single-organism process (GO:0044699);; molecular function: binding (GO:0005488)	K03942|0|mde:101897732|NADH dehydrogenase [ubiquinone] flavoprotein 1, mitochondrial-like; K03942 NADH dehydrogenase (ubiquinone) flavoprotein 1 [EC:1.6.5.3 1.6.99.3] (A)	Oxidative phosphorylation (ko00190)
c19192.graph_c0	--	--	--	5.05708e-05	2.14909	up	0.0289821	1.38524	normal	gi|125808884|ref|XP_001360907.1|	GA17346 [Drosophila pseudoobscura pseudoobscura]	Dopamine N-acetyltransferase {ECO:0000312|EMBL:AAF47172.1} GN=CG3318 OS=Drosophila melanogaster (Fruit fly) PE=1 SV=1	--	Molecular Function: N-acetyltransferase activity (GO:0008080);; Biological Process: phenol-containing compound metabolic process (GO:0018958);; Biological Process: single-multicellular organism process (GO:0044707);; Biological Process: organonitrogen compound metabolic process (GO:1901564);;	molecular function: catalytic activity (GO:0003824);; biological process: metabolic process (GO:0008152);; biological process: cellular process (GO:0009987);; biological process: multicellular organismal process (GO:0032501);; biological process: single-organism process (GO:0044699)	--	--
c36332.graph_c1	--	--	--	0.00924581	1.23946	up	0.224065	0.758452	normal	gi|290981403|ref|XP_002673420.1|	polyadenylate binding protein [Naegleria gruberi]	Polyadenylate-binding protein GN=pAbp OS=Drosophila melanogaster (Fruit fly) PE=1 SV=3	--	Molecular Function: mRNA binding (GO:0003729);; Cellular Component: spliceosomal complex (GO:0005681);; Cellular Component: cytoplasm (GO:0005737);; Biological Process: germ cell development (GO:0007281);; Biological Process: spermatogenesis (GO:0007283);; Biological Process: gene expression (GO:0010467);; Biological Process: neurogenesis (GO:0022008);; Biological Process: cell cycle process (GO:…	molecular function: binding (GO:0005488);; cellular component: cell (GO:0005623);; cellular component: macromolecular complex (GO:0032991);; cellular component: organelle (GO:0043226);; cellular component: organelle part (GO:0044422);; cellular component: cell part (GO:0044464);; biological process: reproduction (GO:0000003);; biological process: cellular process (GO:0009987);; biological process…	K13126|1.27787e-37|dsi:Dsim_GD11341|GD11341 gene product from transcript GD11341-RA; K13126 polyadenylate-binding protein (A)	RNA transport (ko03013);; mRNA surveillance pathway (ko03015);; RNA degradation (ko03018)
c33492.graph_c0	0.0638713	1.17446	normal	4.40415e-13	2.4674	up	0.00692826	1.30006	up	gi|330797249|ref|XP_003286674.1|	myosin IB [Dictyostelium purpureum]	Myosin IB heavy chain GN=myoB OS=Dictyostelium discoideum (Slime mold) PE=1 SV=2	Cytoskeleton	Molecular Function: motor activity (GO:0003774);; Molecular Function: ATP binding (GO:0005524);; Cellular Component: nucleus (GO:0005634);; Biological Process: DNA replication (GO:0006260);; Cellular Component: myosin complex (GO:0016459);;	molecular function: catalytic activity (GO:0003824);; biological process: metabolic process (GO:0008152);; molecular function: binding (GO:0005488);; cellular component: cell (GO:0005623);; cellular component: organelle (GO:0043226);; cellular component: cell part (GO:0044464);; biological process: cellular process (GO:0009987);; cellular component: macromolecular complex (GO:0032991);; cellular …	K10356|0|bfo:BRAFLDRAFT_219333|hypothetical protein; K10356 myosin I (A)	--
c44412.graph_c0	0.178292	1.22315	normal	6.96576e-05	1.86114	up	0.441665	0.650752	normal	gi|735853950|dbj|GAM23577.1|	hypothetical protein SAMD00019534_067520 [Acytostelium subglobosum LB1]	Myosin-K heavy chain GN=myoK OS=Dictyostelium discoideum (Slime mold) PE=2 SV=1	Cytoskeleton	Molecular Function: motor activity (GO:0003774);; Molecular Function: ATP binding (GO:0005524);; Cellular Component: myosin complex (GO:0016459);;	molecular function: catalytic activity (GO:0003824);; biological process: metabolic process (GO:0008152);; molecular function: binding (GO:0005488);; cellular component: cell (GO:0005623);; cellular component: macromolecular complex (GO:0032991);; cellular component: organelle (GO:0043226);; cellular component: organelle part (GO:0044422);; cellular component: cell part (GO:0044464)	K10356|7.2511e-44|hmg:100211911|unconventional myosin-Ie-like; K10356 myosin I (A)	--
c40383.graph_c0	1.18627e-05	1.30687	up	2.24304e-10	1.89548	up	0.107286	0.587124	normal	gi|313219894|emb|CBY30809.1|	unnamed protein product [Oikopleura dioica]	Kinesin-like protein Klp68D GN=Klp68D OS=Drosophila melanogaster (Fruit fly) PE=2 SV=2	Cytoskeleton	Molecular Function: motor activity (GO:0003774);; Biological Process: microtubule-based movement (GO:0007018);;	molecular function: catalytic activity (GO:0003824);; biological process: metabolic process (GO:0008152);; biological process: cellular process (GO:0009987);; biological process: single-organism process (GO:0044699)	K11498|1.41981e-49|ssc:100626792|CENPE; centromere protein E, 312kDa; K11498 centromeric protein E (A)	--
c44890.graph_c1	0.137763	0.744676	normal	0.00373929	1.13488	up	0.421465	0.390223	normal	gi|678317175|emb|CDW85935.1|	kinesin motor domain containing protein [Stylonychia lemnae]	Osmotic avoidance abnormal protein 3 GN=osm-3 OS=Caenorhabditis elegans PE=2 SV=4	Cytoskeleton	Molecular Function: microtubule motor activity (GO:0003777);; Molecular Function: serine-tRNA ligase activity (GO:0004828);; Molecular Function: ATP binding (GO:0005524);; Cellular Component: kinesin complex (GO:0005871);; Cellular Component: microtubule (GO:0005874);; Biological Process: microtubule-based movement (GO:0007018);; Molecular Function: microtubule binding (GO:0008017);;	molecular function: catalytic activity (GO:0003824);; biological process: metabolic process (GO:0008152);; molecular function: binding (GO:0005488);; cellular component: cell (GO:0005623);; cellular component: macromolecular complex (GO:0032991);; cellular component: organelle (GO:0043226);; cellular component: organelle part (GO:0044422);; cellular component: cell part (GO:0044464);; biological …	K10394|1.64908e-43|tru:101077918|kinesin-like protein KIF3C-like; K10394 kinesin family member 3/17 (A)	--
c42645.graph_c0	0.24444	-0.592386	normal	3.8453e-13	-2.27438	down	0.000130368	-1.68168	down	gi|678311556|emb|CDW88816.1|	kinesin motor domain containing protein [Stylonychia lemnae]	Kinesin-related protein 10 GN=kif10 OS=Dictyostelium discoideum (Slime mold) PE=3 SV=1	Cytoskeleton	Molecular Function: microtubule motor activity (GO:0003777);; Molecular Function: ATP binding (GO:0005524);; Cellular Component: kinesin complex (GO:0005871);; Cellular Component: microtubule (GO:0005874);; Biological Process: microtubule-based movement (GO:0007018);; Molecular Function: microtubule binding (GO:0008017);; Molecular Function: lyase activity (GO:0016829);;	molecular function: catalytic activity (GO:0003824);; biological process: metabolic process (GO:0008152);; molecular function: binding (GO:0005488);; cellular component: cell (GO:0005623);; cellular component: macromolecular complex (GO:0032991);; cellular component: organelle (GO:0043226);; cellular component: organelle part (GO:0044422);; cellular component: cell part (GO:0044464);; biological …	K10401|5.81387e-36|xla:373792|kif19, flj37300-a; kinesin family member 19; K10401 kinesin family member 18/19 (A)	--
[truncated: 6,994 more rows]
